# Supplementary material
Source: PubMed Central journal article supplement (PMC6648964)

# Radical Functionalization of Unsaturated Amino Acids: Synthesis of side-chain Fluorinated, Azido-substituted and Hydroxylated Amino Acids

Philip A. P. Reeve,<sup>a</sup> Urszula Grabowska,<sup>b</sup> Lourdes Salvador Oden,<sup>b</sup> Daniel Wikteliuś,<sup>b</sup> Fredrik Wångsell,<sup>b</sup> and Richard F. W. Jackson<sup>a\*</sup>

<sup>a</sup>Department of Chemistry, The University of Sheffield, Dainton Building, Sheffield, S3 7HF, UK; Fax: + 44 114 222 9303; Tel: + 44 114 222 9464; E-mail: r.f.w.jackson@sheffield.ac.uk

<sup>b</sup>Medivir AB, PO Box 1086, SE-141 22 Huddinge, Sweden.

e-mail: r.f.w.jackson@sheffield.ac.uk

## Electronic Supplementary Information

|                                                                                                                      |      |
|----------------------------------------------------------------------------------------------------------------------|------|
| Crystal Structure Determination for <b>2a</b>                                                                        | S2   |
| Crystal Structure Determination for <b>24</b>                                                                        | S4   |
| Crystal Structure Determination for <b>40</b>                                                                        | S6   |
| <sup>1</sup> H, <sup>13</sup> C for all compounds, and <sup>19</sup> F NMR spectra for compounds containing fluorine | S8   |
| Chiral HPLC Traces for <b>25</b> and <i>ent</i> - <b>25</b>                                                          | S124 |

**Methyl (2S)-2-[[*tert*-butoxy]carbonyl]amino]-3-(1-fluorocyclopentyl)propanoate (2a)**

|                                   |                                                                                                          |
|-----------------------------------|----------------------------------------------------------------------------------------------------------|
| Empirical formula                 | C <sub>14</sub> H <sub>24</sub> F N O <sub>4</sub>                                                       |
| Formula weight                    | 289.34                                                                                                   |
| Temperature                       | 100(2) K                                                                                                 |
| Wavelength                        | 1.54178 Å                                                                                                |
| Crystal system                    | Monoclinic                                                                                               |
| Space group                       | P2 <sub>1</sub>                                                                                          |
| Unit cell dimensions              | a = 16.1257(6) Å      a = 90°.<br>b = 5.0821(2) Å      b = 97.582(2)°.<br>c = 19.3075(6) Å      g = 90°. |
| Volume                            | 1568.46(10) Å <sup>3</sup>                                                                               |
| Z                                 | 4                                                                                                        |
| Density (calculated)              | 1.225 Mg/m <sup>3</sup>                                                                                  |
| Absorption coefficient            | 0.806 mm <sup>-1</sup>                                                                                   |
| F(000)                            | 624                                                                                                      |
| Crystal size                      | 0.320 x 0.120 x 0.120 mm <sup>3</sup>                                                                    |
| Theta range for data collection   | 2.308 to 66.651°.                                                                                        |
| Index ranges                      | -15 ≤ h ≤ 19, -6 ≤ k ≤ 6, -22 ≤ l ≤ 22                                                                   |
| Reflections collected             | 22527                                                                                                    |
| Independent reflections           | 5386 [R(int) = 0.1030]                                                                                   |
| Completeness to theta = 67.679°   | 97.2 %                                                                                                   |
| Absorption correction             | Semi-empirical from equivalents                                                                          |
| Max. and min. transmission        | 0.86 and 0.65                                                                                            |
| Refinement method                 | Full-matrix least-squares on F <sup>2</sup>                                                              |
| Data / restraints / parameters    | 5386 / 13 / 379                                                                                          |
| Goodness-of-fit on F <sup>2</sup> | 1.019                                                                                                    |
| Final R indices [I > 2σ(I)]       | R1 = 0.0571, wR2 = 0.1104                                                                                |
| R indices (all data)              | R1 = 0.1062, wR2 = 0.1295                                                                                |
| Absolute structure parameter      | 0.00(15)                                                                                                 |
| Extinction coefficient            | n/a                                                                                                      |
| Largest diff. peak and hole       | 0.352 and -0.324 e.Å <sup>-3</sup>                                                                       |

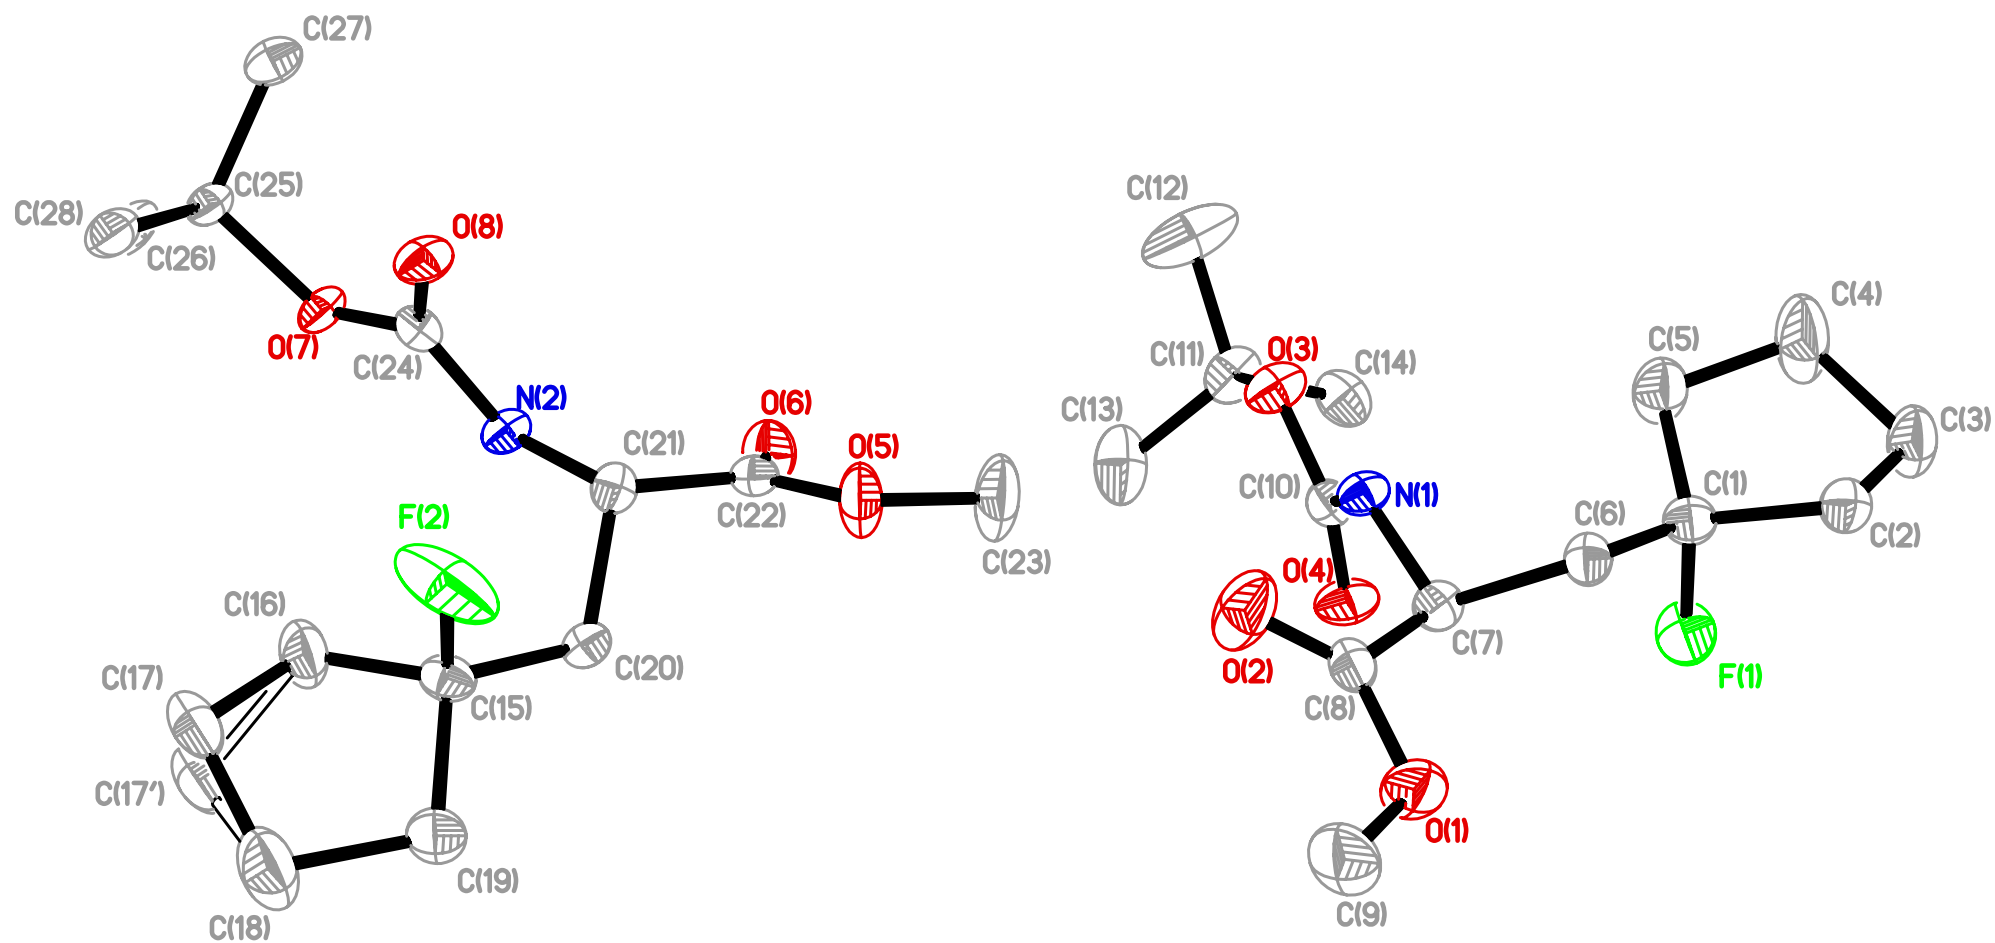

Figure S1. Thermal ellipsoid plot for **2a**, with ellipsoid contour probability at the 50% level.

**Methyl (2S)-2-[[*tert*-butoxy]carbonyl]amino]-3-(1,4,4-trifluorocyclohexyl)propanoate (24)**

|                                   |                                                                                                     |
|-----------------------------------|-----------------------------------------------------------------------------------------------------|
| Empirical formula                 | C <sub>15</sub> H <sub>24</sub> F <sub>3</sub> N O <sub>4</sub>                                     |
| Formula weight                    | 339.35                                                                                              |
| Temperature                       | 100(2) K                                                                                            |
| Wavelength                        | 1.54178 Å                                                                                           |
| Crystal system                    | Orthorhombic                                                                                        |
| Space group                       | P2 <sub>1</sub> 2 <sub>1</sub> 2 <sub>1</sub>                                                       |
| Unit cell dimensions              | a = 5.20190(10) Å      a = 90°.<br>b = 11.2334(3) Å      b = 90°.<br>c = 28.6154(6) Å      g = 90°. |
| Volume                            | 1672.14(7) Å <sup>3</sup>                                                                           |
| Z                                 | 4                                                                                                   |
| Density (calculated)              | 1.348 Mg/m <sup>3</sup>                                                                             |
| Absorption coefficient            | 1.016 mm <sup>-1</sup>                                                                              |
| F(000)                            | 720                                                                                                 |
| Crystal size                      | 0.400 x 0.130 x 0.100 mm <sup>3</sup>                                                               |
| Theta range for data collection   | 3.089 to 66.605°.                                                                                   |
| Index ranges                      | -6 ≤ h ≤ 5, -13 ≤ k ≤ 13, -34 ≤ l ≤ 34                                                              |
| Reflections collected             | 20183                                                                                               |
| Independent reflections           | 2951 [R(int) = 0.0271]                                                                              |
| Completeness to theta = 67.000°   | 99.1 %                                                                                              |
| Absorption correction             | Semi-empirical from equivalents                                                                     |
| Max. and min. transmission        | 0.87 and 0.54                                                                                       |
| Refinement method                 | Full-matrix least-squares on F <sup>2</sup>                                                         |
| Data / restraints / parameters    | 2951 / 0 / 212                                                                                      |
| Goodness-of-fit on F <sup>2</sup> | 1.092                                                                                               |
| Final R indices [I > 2σ(I)]       | R1 = 0.0260, wR2 = 0.0646                                                                           |
| R indices (all data)              | R1 = 0.0271, wR2 = 0.0656                                                                           |
| Absolute structure parameter      | 0.00(4)                                                                                             |
| Extinction coefficient            | n/a                                                                                                 |
| Largest diff. peak and hole       | 0.118 and -0.265 e.Å <sup>-3</sup>                                                                  |

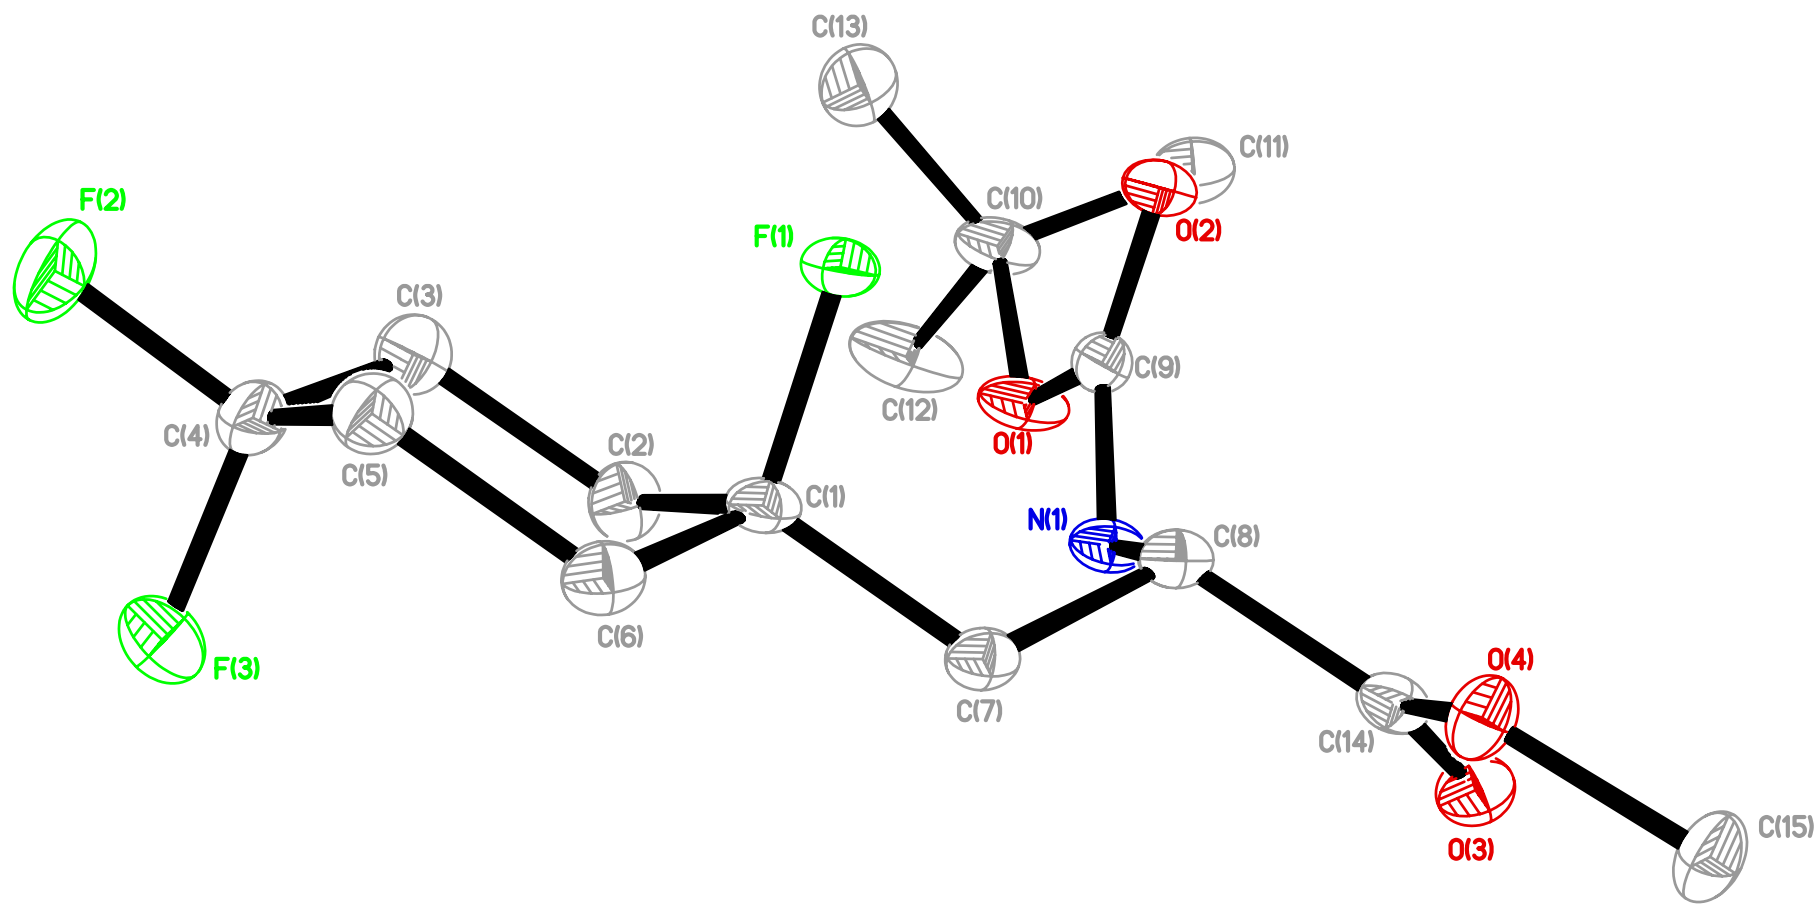

Figure S2. Thermal ellipsoid plot for **24**, with ellipsoid contour probability at the 50% level.

***Tert-butyl N-[(3S)-2-oxo-1-azaspiro[4.5]decan-3-yl]carbamate (40)***

|                                   |                                                                                                         |
|-----------------------------------|---------------------------------------------------------------------------------------------------------|
| Empirical formula                 | C <sub>14</sub> H <sub>24</sub> N <sub>2</sub> O <sub>3</sub>                                           |
| Formula weight                    | 268.35                                                                                                  |
| Temperature                       | 100(2) K                                                                                                |
| Wavelength                        | 1.54178 Å                                                                                               |
| Crystal system                    | Monoclinic                                                                                              |
| Space group                       | P2 <sub>1</sub>                                                                                         |
| Unit cell dimensions              | a = 5.8929(4) Å      a = 90°.<br>b = 9.6349(6) Å      b = 95.355(4)°.<br>c = 13.2171(9) Å      g = 90°. |
| Volume                            | 747.16(9) Å <sup>3</sup>                                                                                |
| Z                                 | 2                                                                                                       |
| Density (calculated)              | 1.193 Mg/m <sup>3</sup>                                                                                 |
| Absorption coefficient            | 0.678 mm <sup>-1</sup>                                                                                  |
| F(000)                            | 292                                                                                                     |
| Crystal size                      | 0.120 x 0.100 x 0.020 mm <sup>3</sup>                                                                   |
| Theta range for data collection   | 5.691 to 66.384°.                                                                                       |
| Index ranges                      | -7 ≤ h ≤ 6, -11 ≤ k ≤ 11, -15 ≤ l ≤ 15                                                                  |
| Reflections collected             | 9664                                                                                                    |
| Independent reflections           | 2594 [R(int) = 0.0559]                                                                                  |
| Completeness to theta = 66.384°   | 99.5 %                                                                                                  |
| Absorption correction             | Semi-empirical from equivalents                                                                         |
| Max. and min. transmission        | 0.7528 and 0.6631                                                                                       |
| Refinement method                 | Full-matrix least-squares on F <sup>2</sup>                                                             |
| Data / restraints / parameters    | 2594 / 1 / 176                                                                                          |
| Goodness-of-fit on F <sup>2</sup> | 1.046                                                                                                   |
| Final R indices [I > 2σ(I)]       | R1 = 0.0381, wR2 = 0.0788                                                                               |
| R indices (all data)              | R1 = 0.0489, wR2 = 0.0828                                                                               |
| Absolute structure parameter      | 0.02(16)                                                                                                |
| Extinction coefficient            | 0.012(2)                                                                                                |
| Largest diff. peak and hole       | 0.153 and -0.144 e.Å <sup>-3</sup>                                                                      |

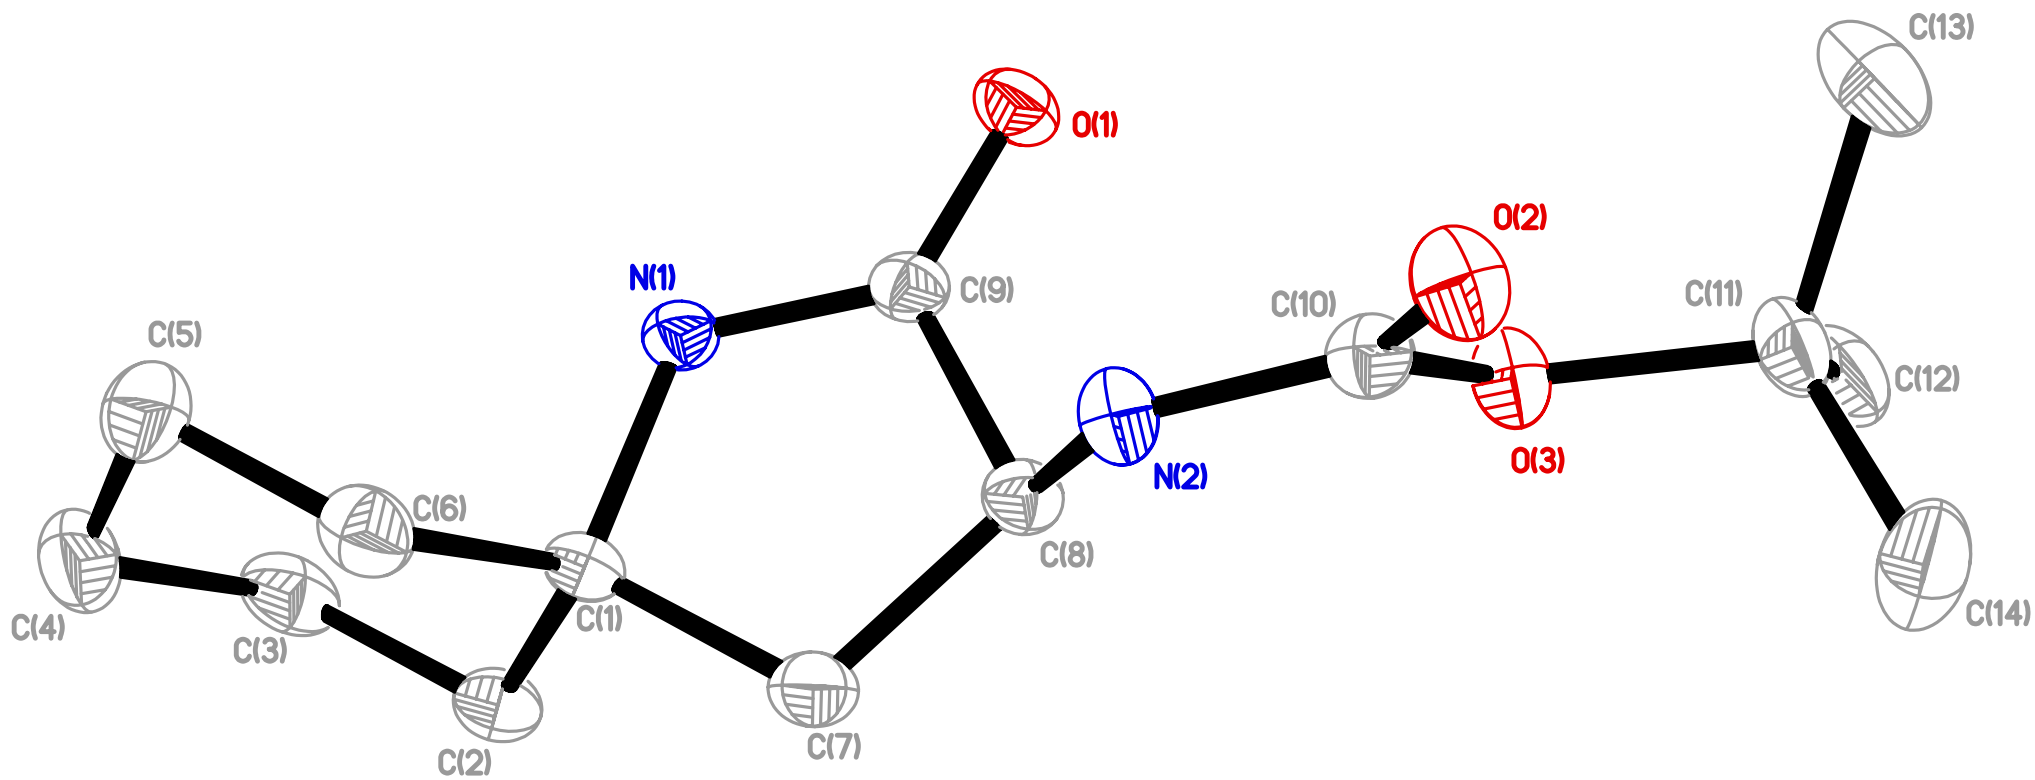

Figure S3. Thermal ellipsoid plot for **40**, with ellipsoid contour probability at the 50% level.

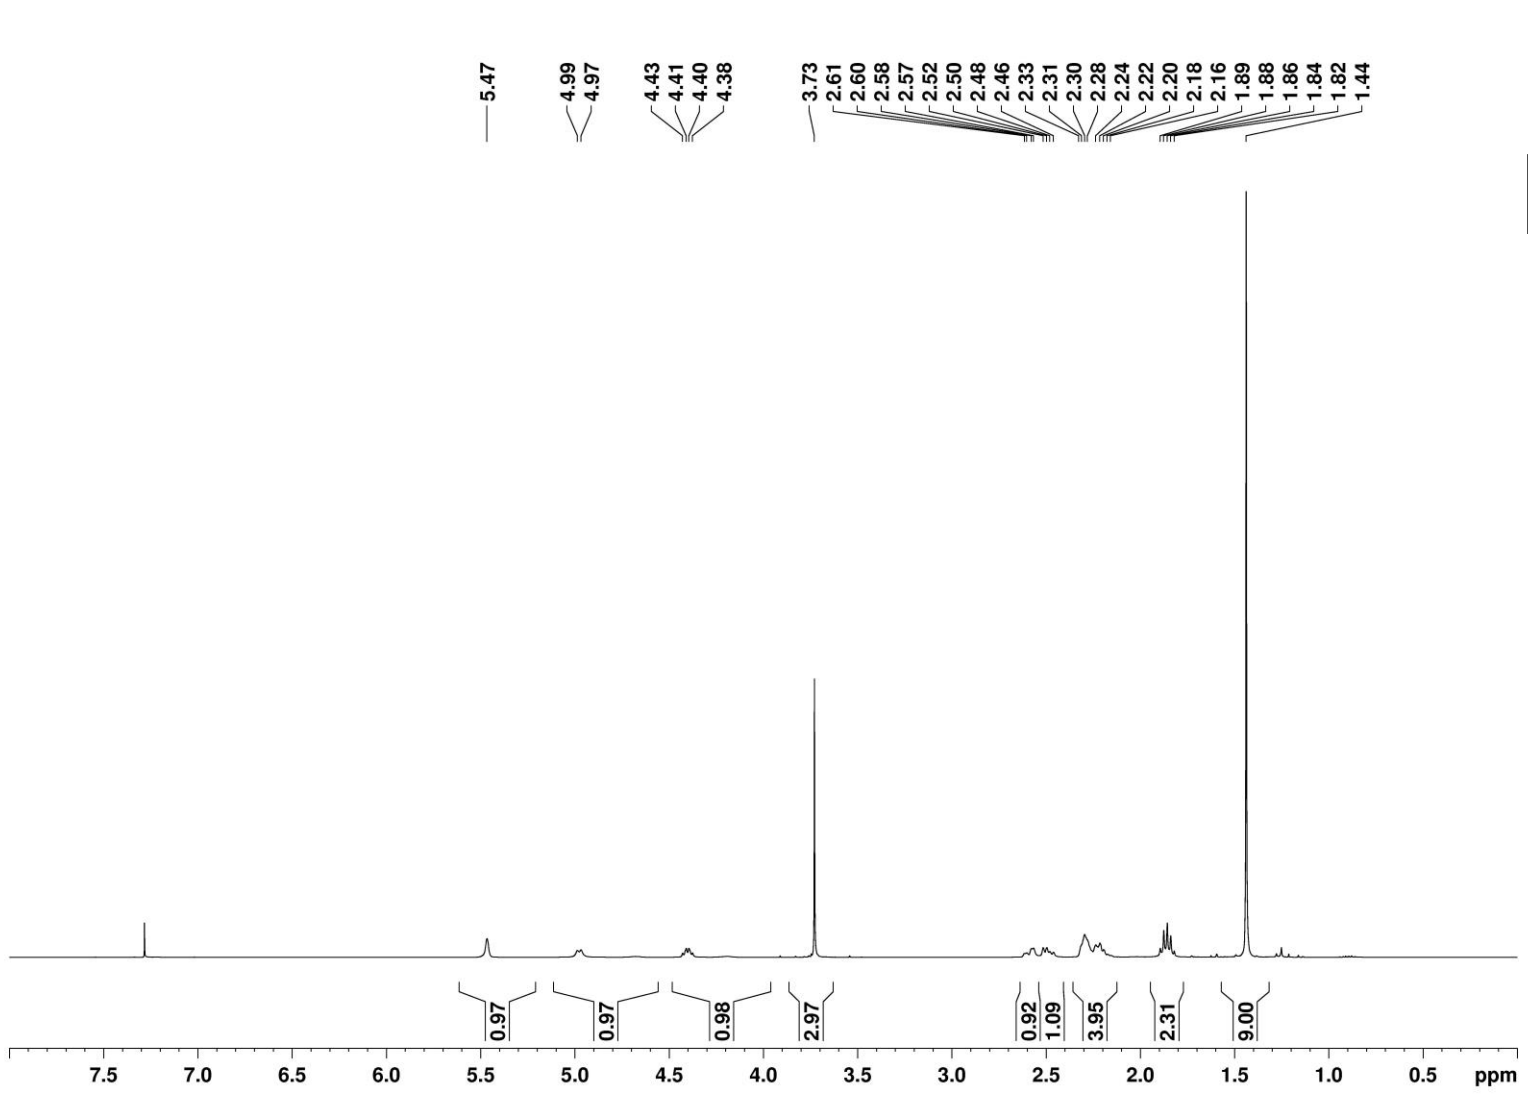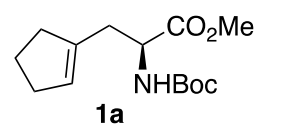

CDCl<sub>3</sub>, 400 MHz



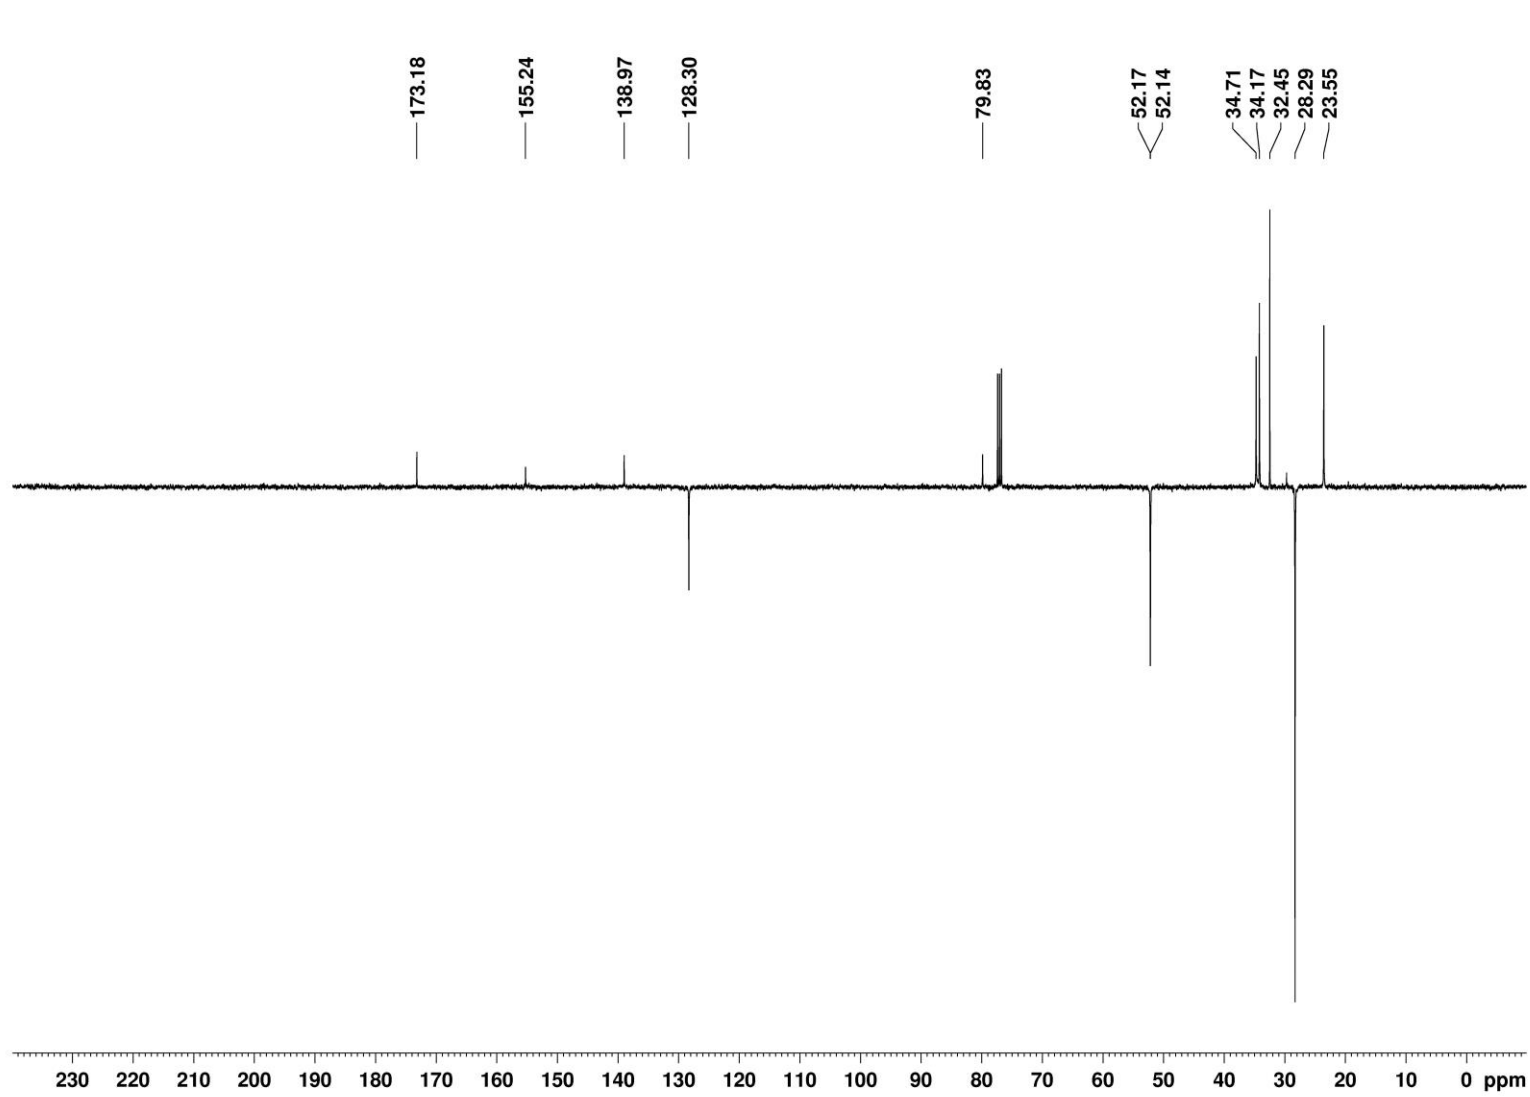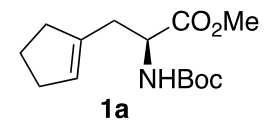

CDCl<sub>3</sub>, 100 MHz

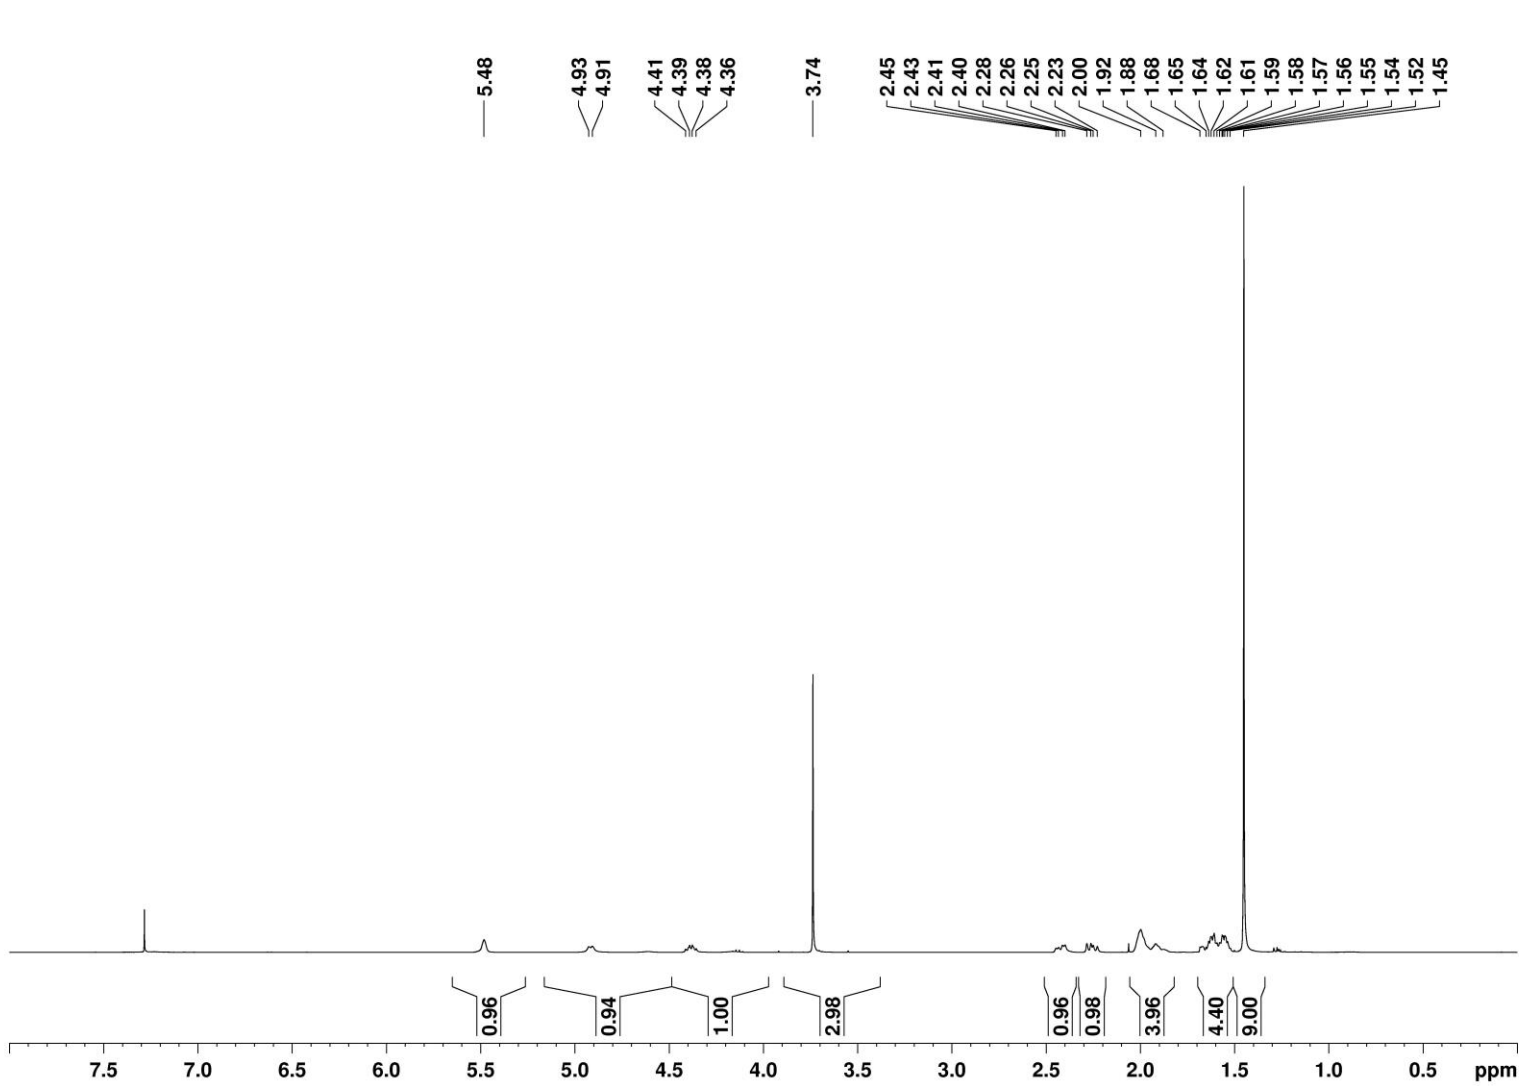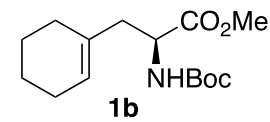

CDCl<sub>3</sub>, 400 MHz

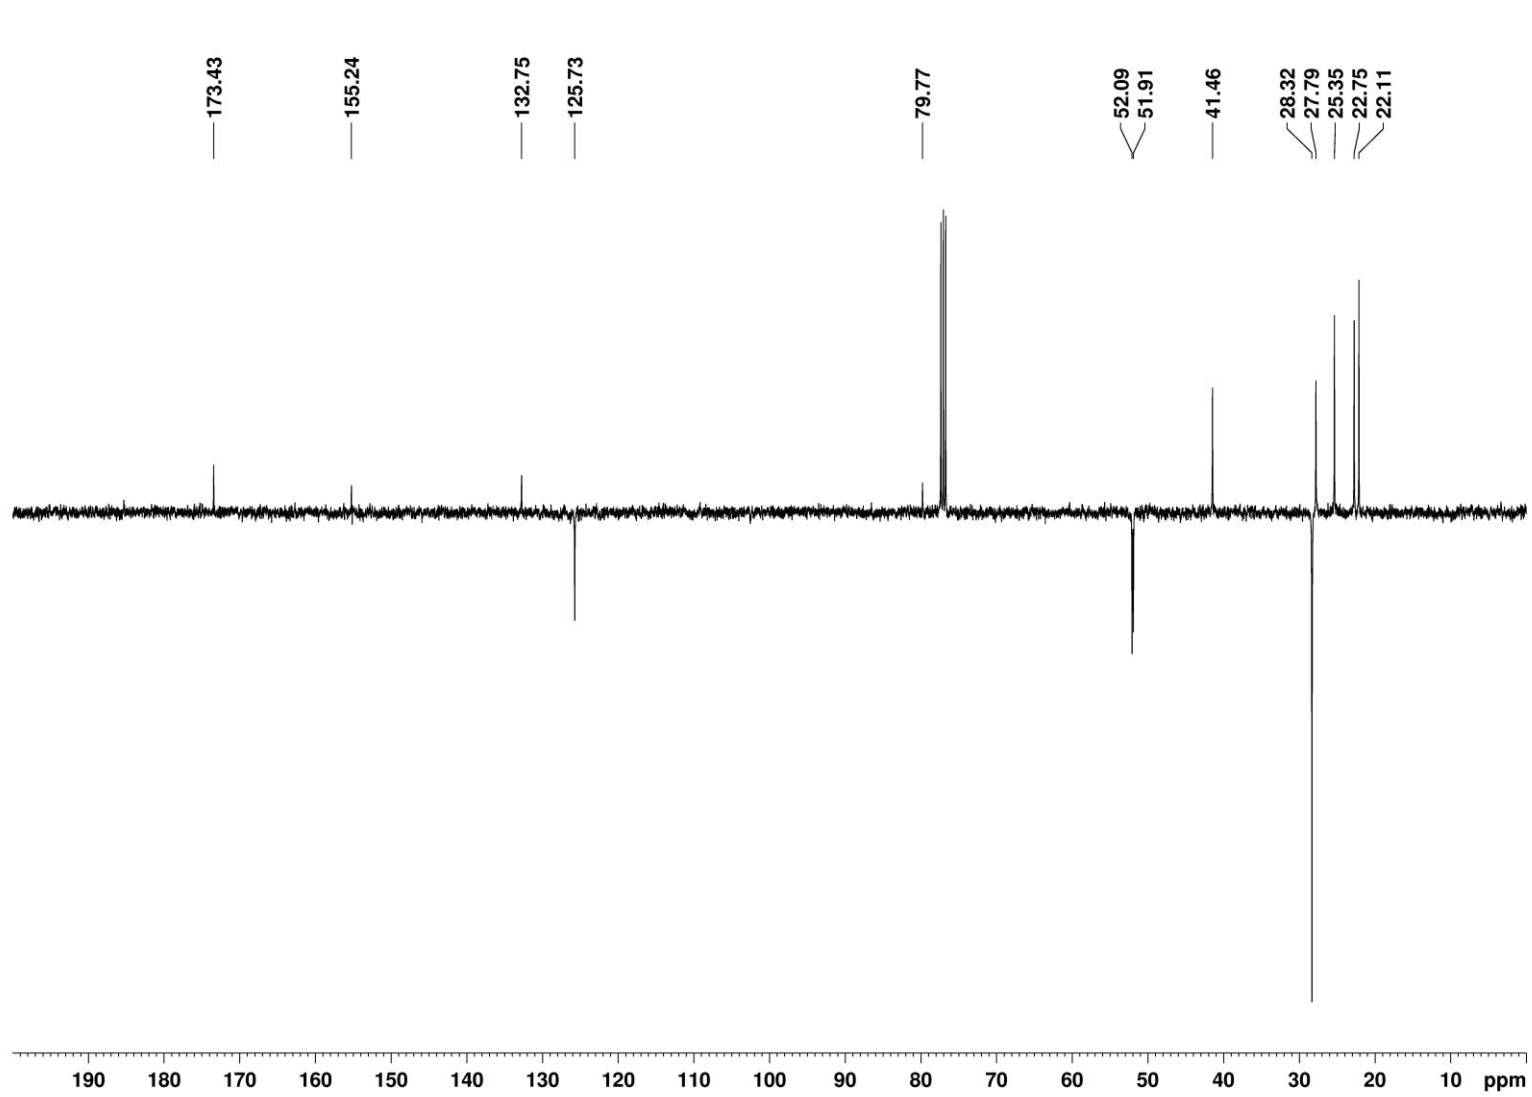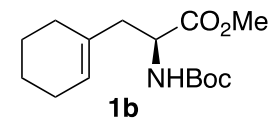

CDCl<sub>3</sub>, 100 MHz

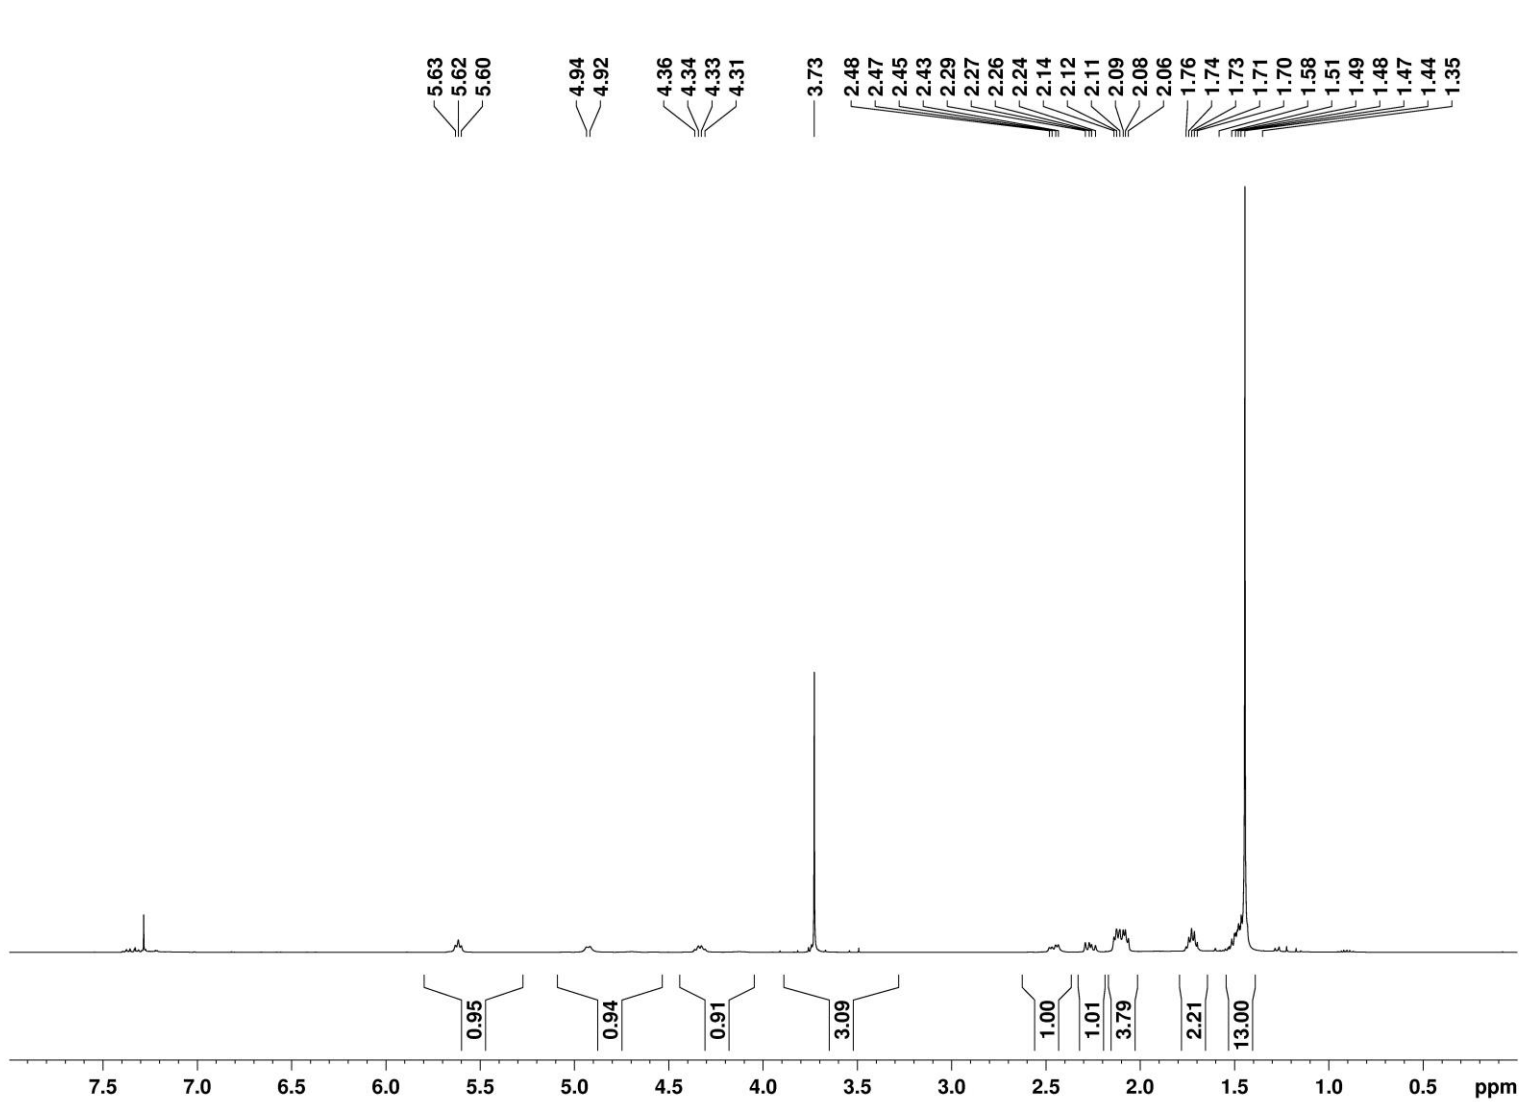

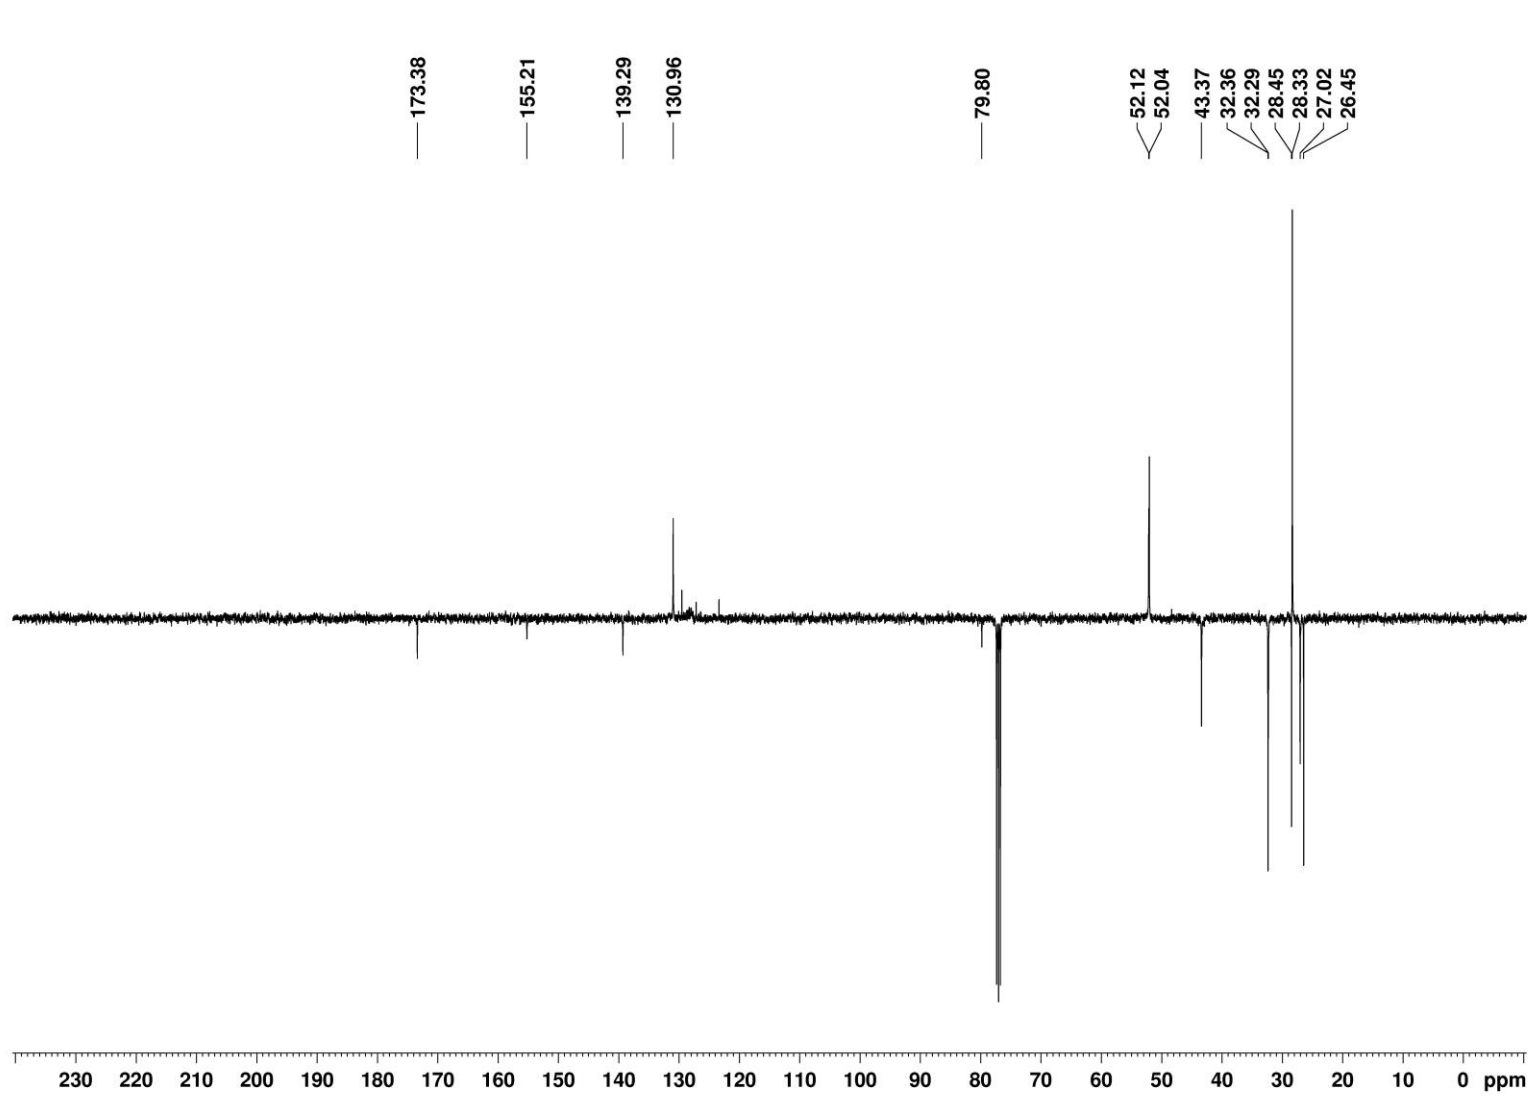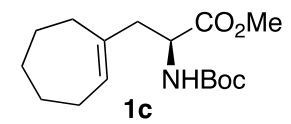

CDCl<sub>3</sub>, 100 MHz

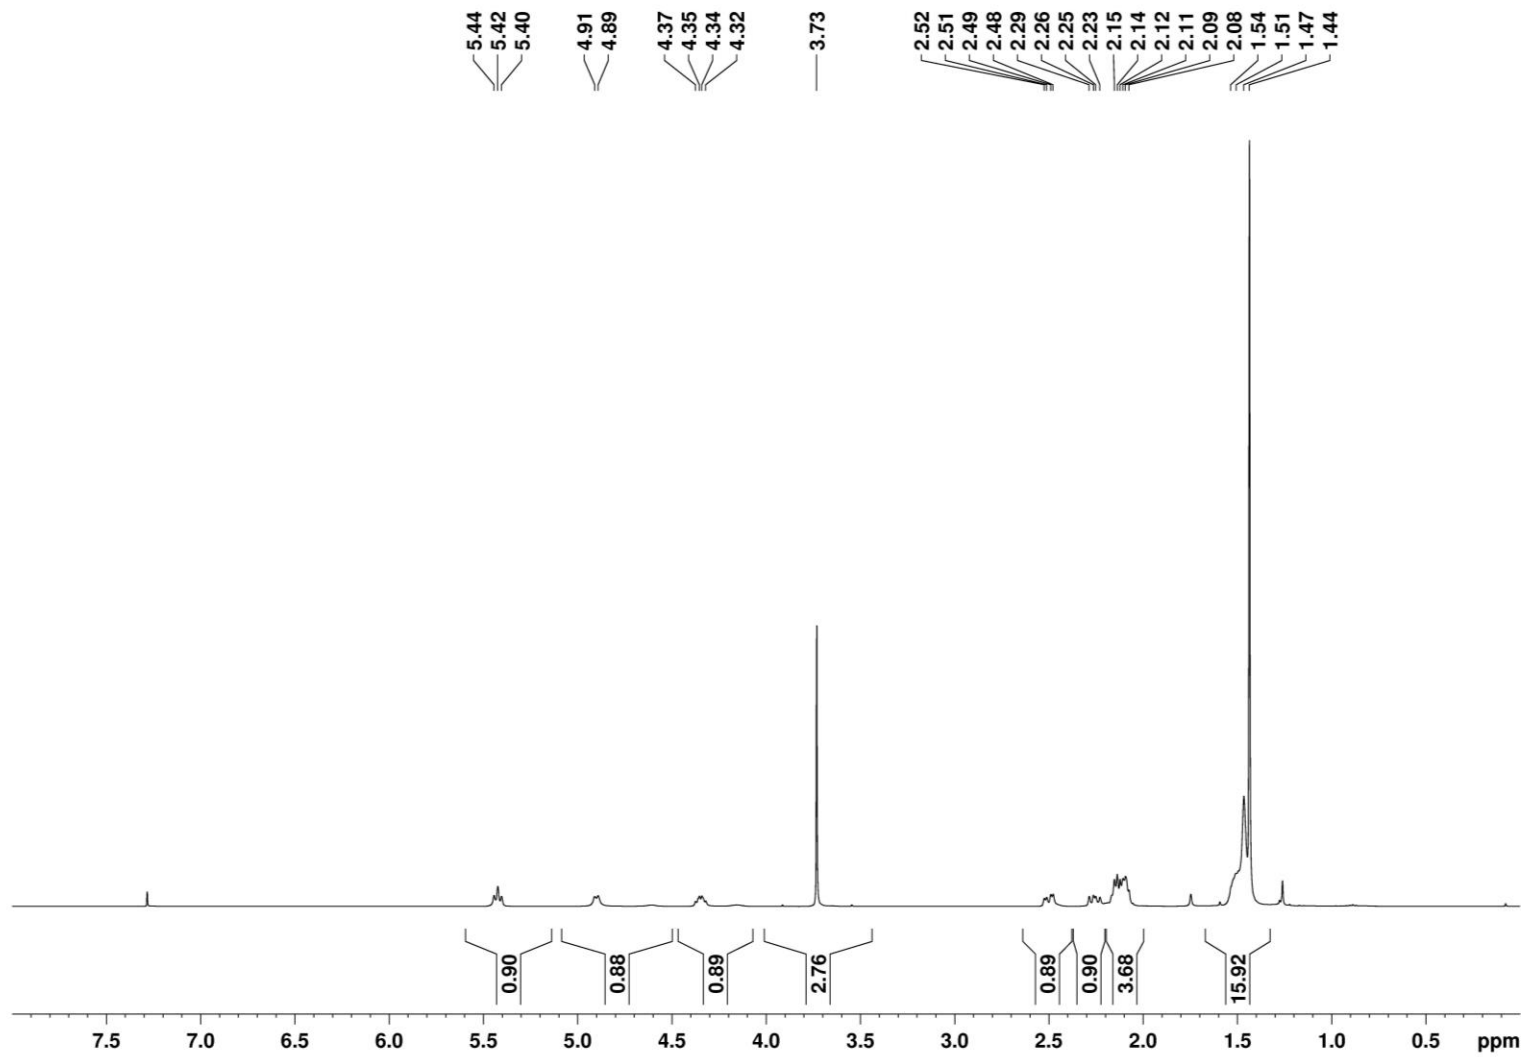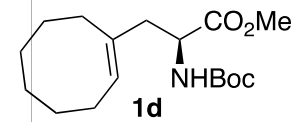

CDCl<sub>3</sub>, 400 MHz

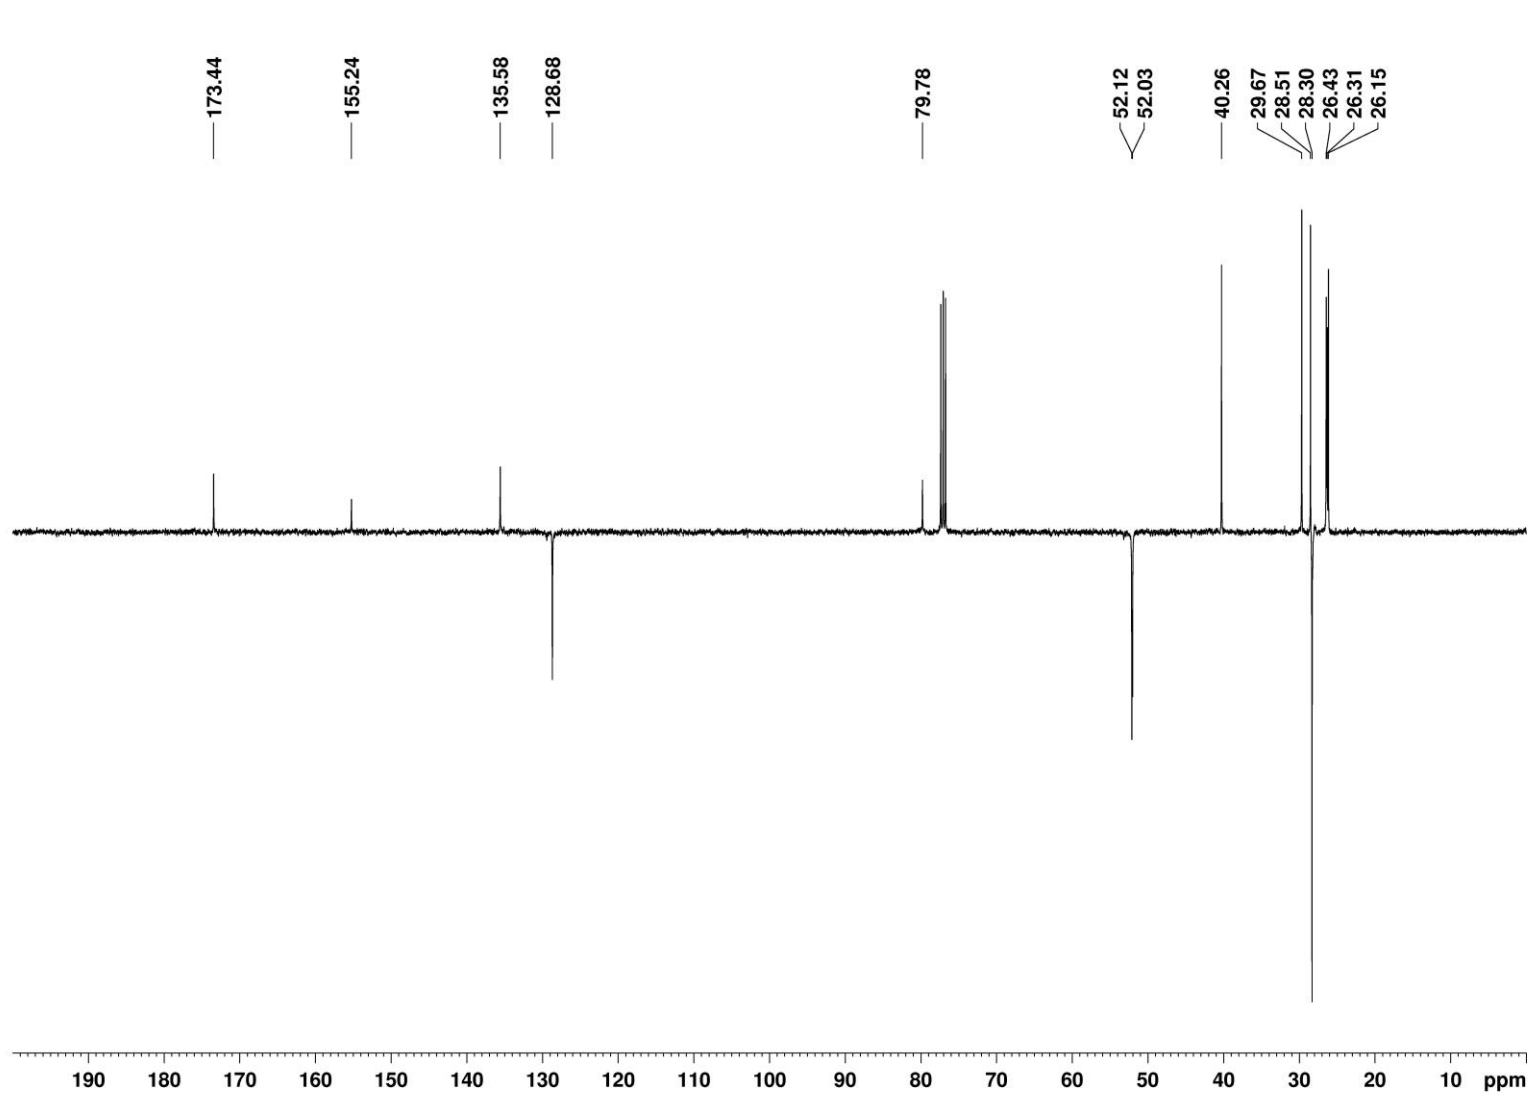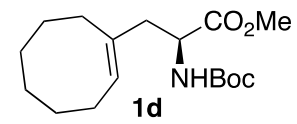

CDCl<sub>3</sub>, 100 MHz

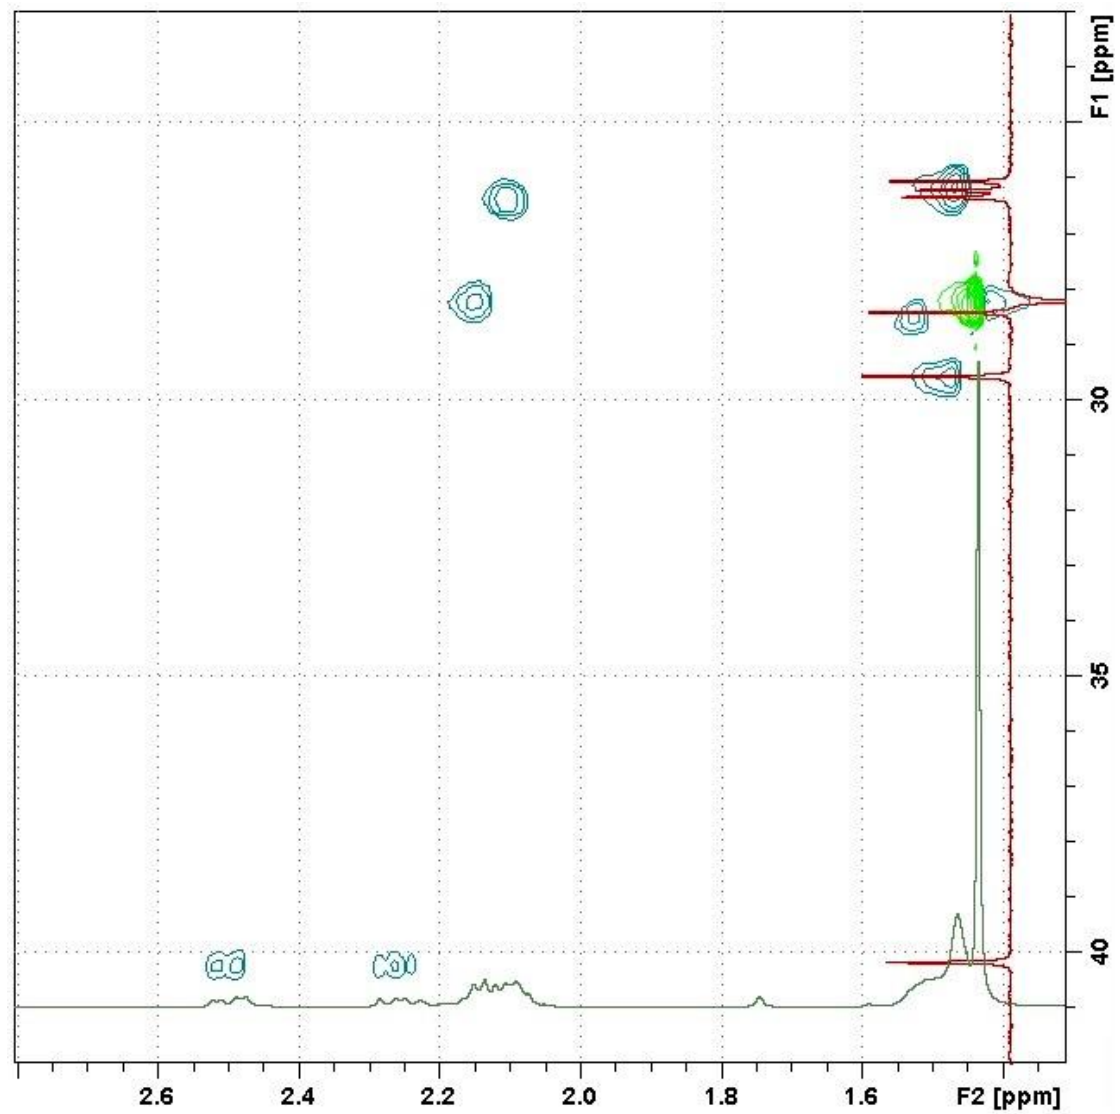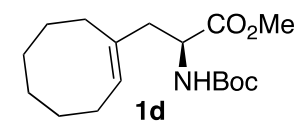

CDCl<sub>3</sub>, HSQC



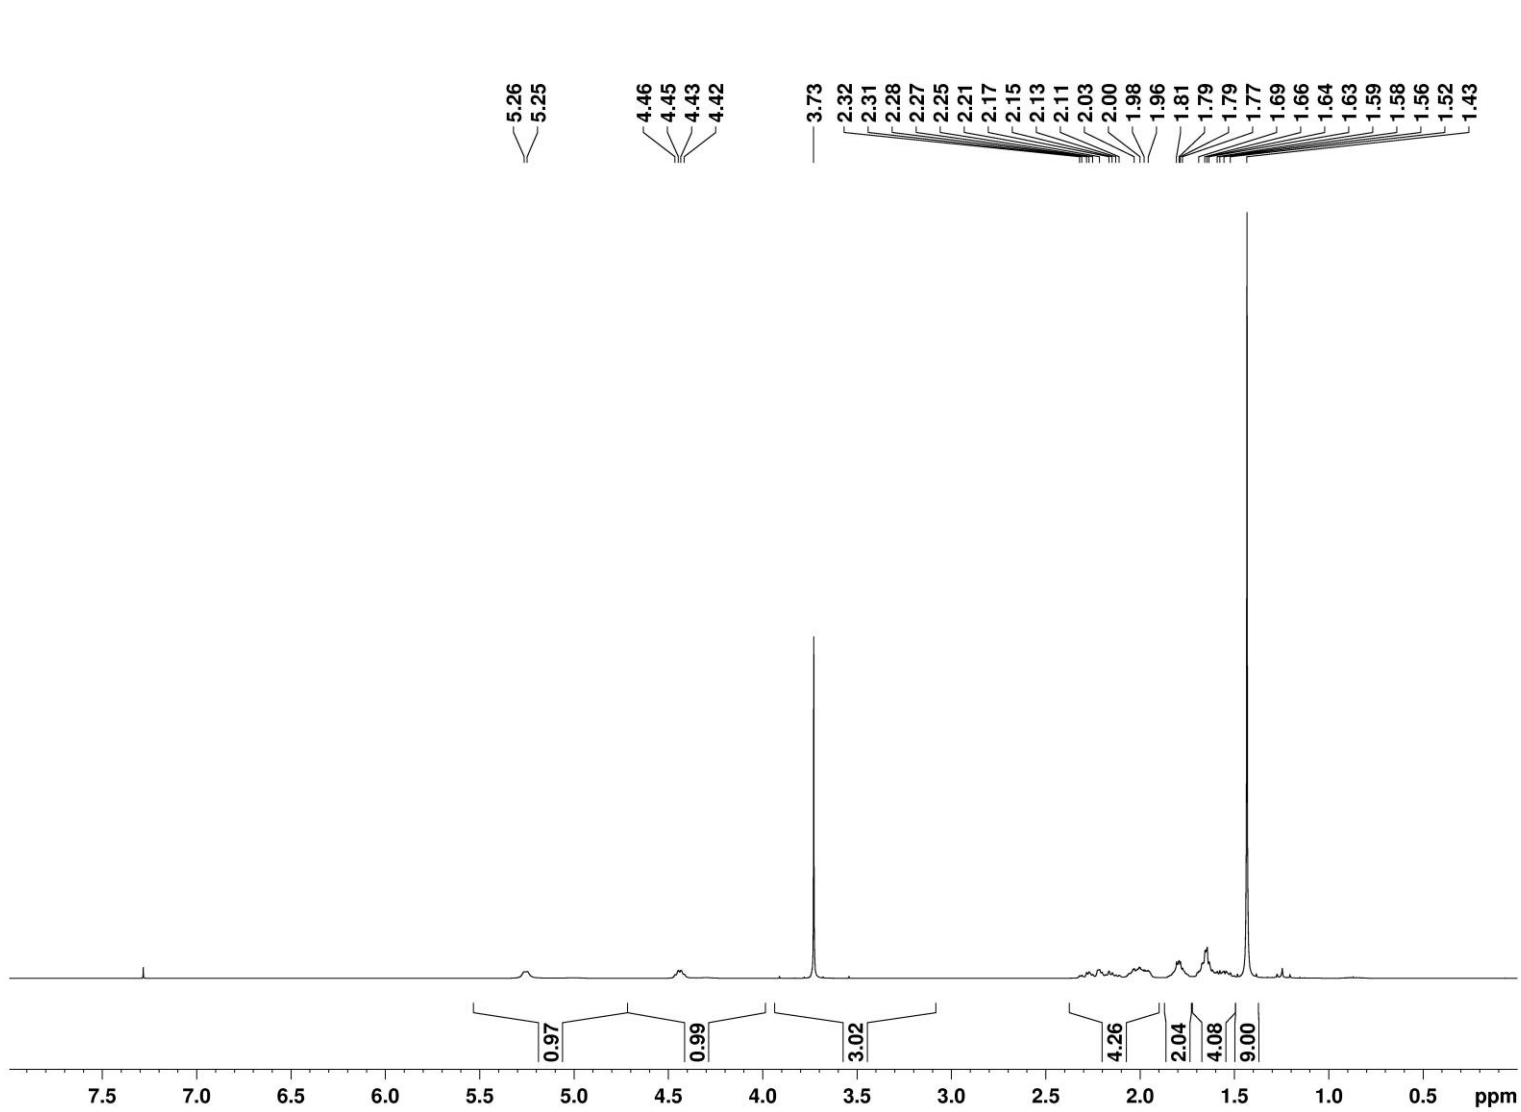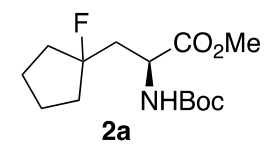

CDCl<sub>3</sub>, 400 MHz

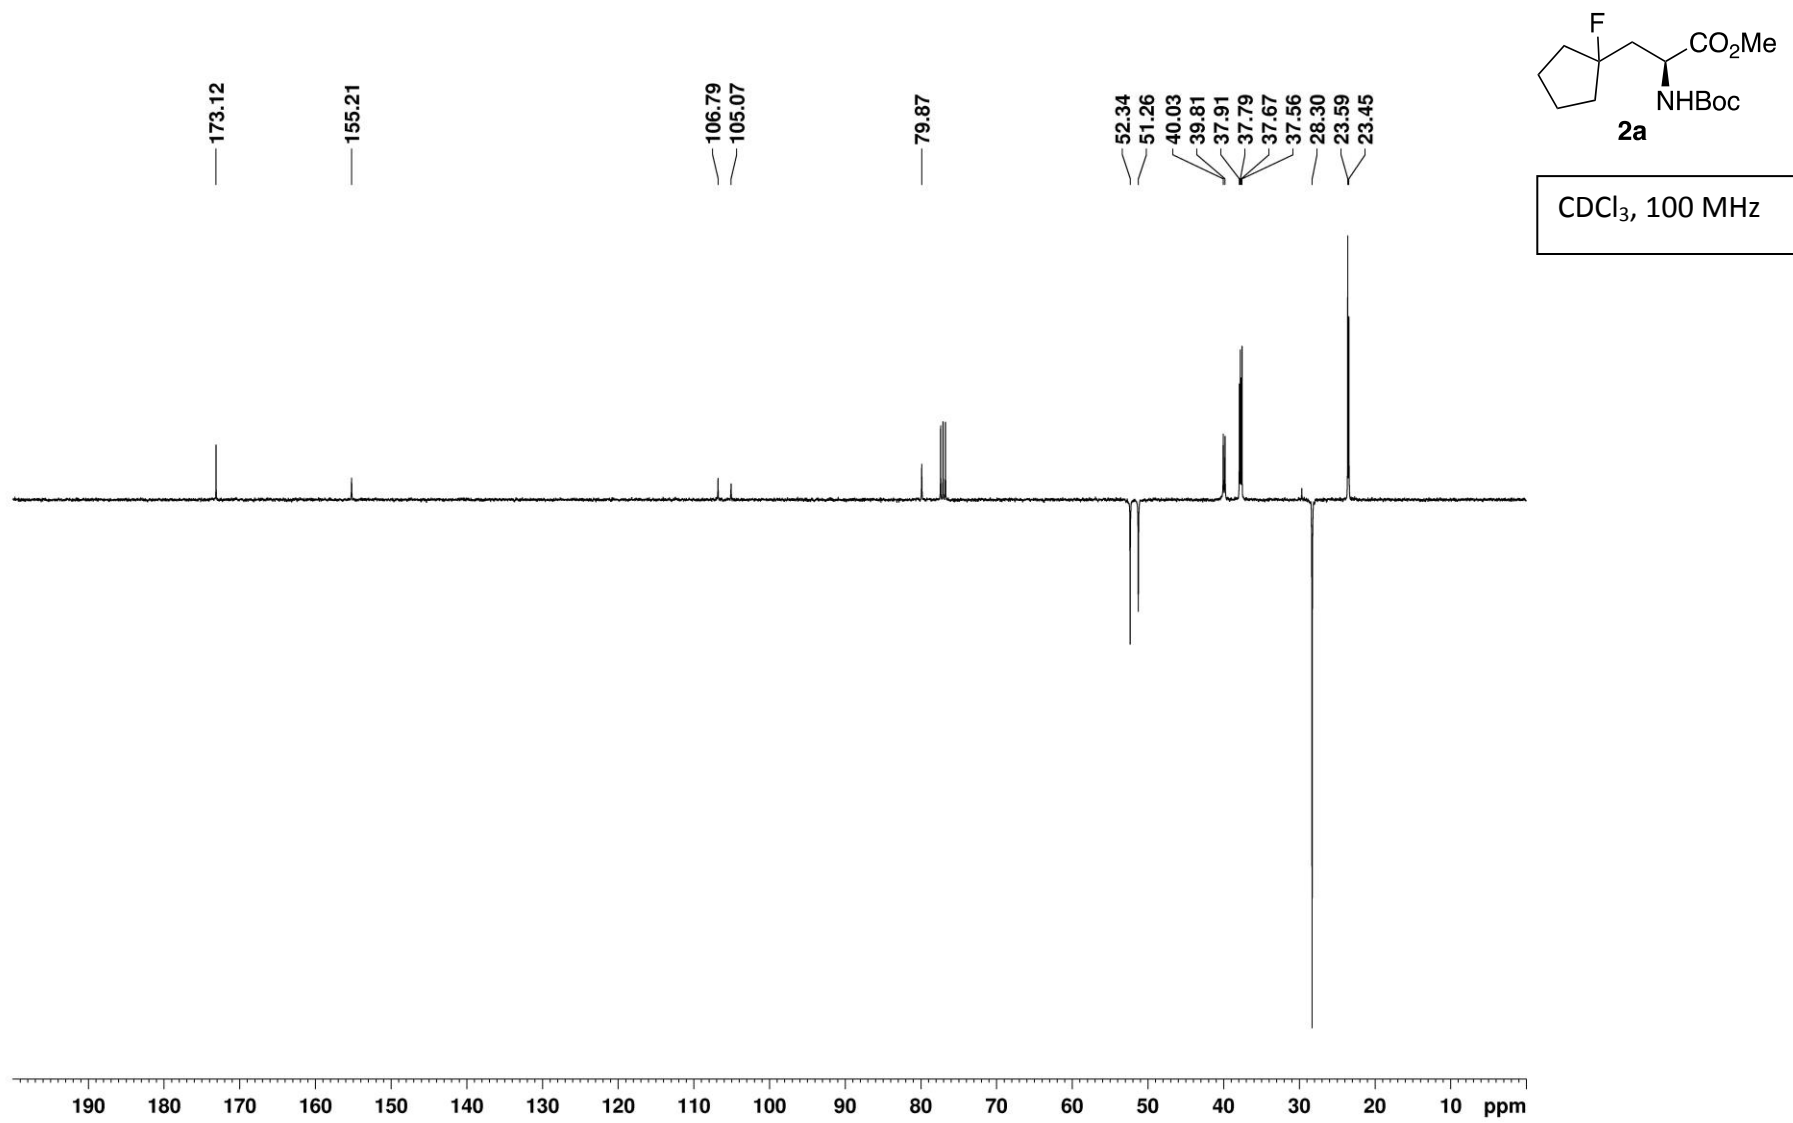

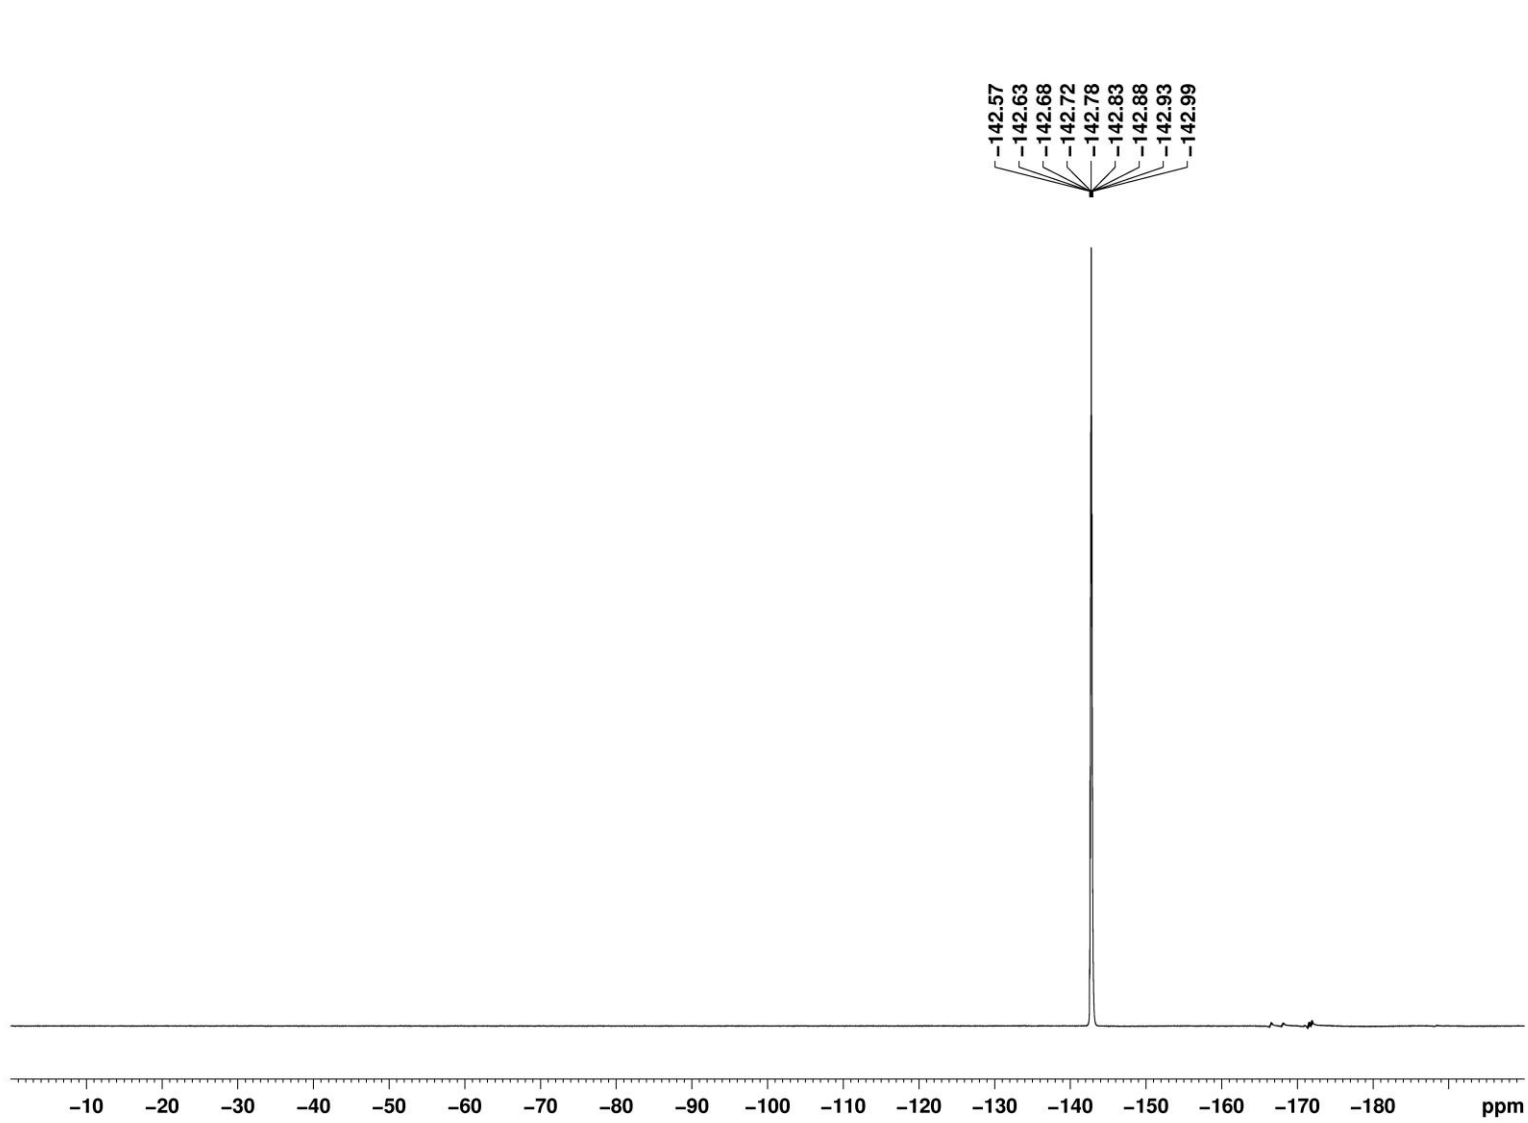

CDCl<sub>3</sub>, 377 MHz

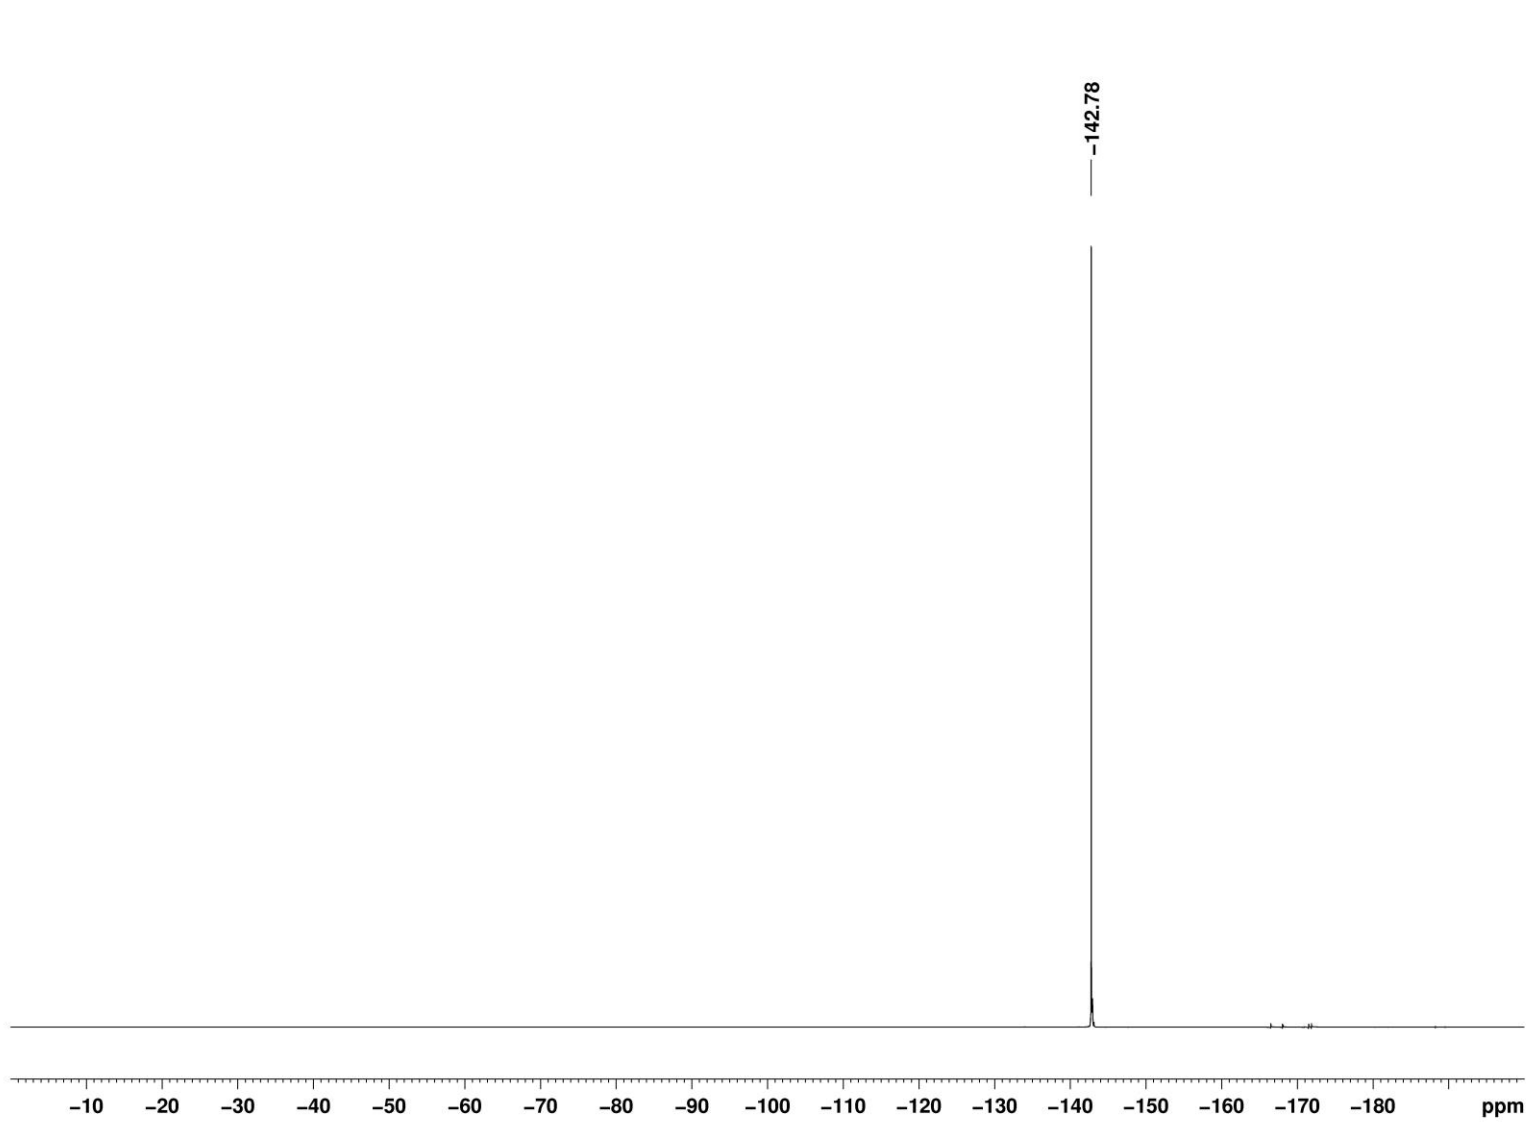

CDCl<sub>3</sub>, {<sup>1</sup>H}, 377 MHz

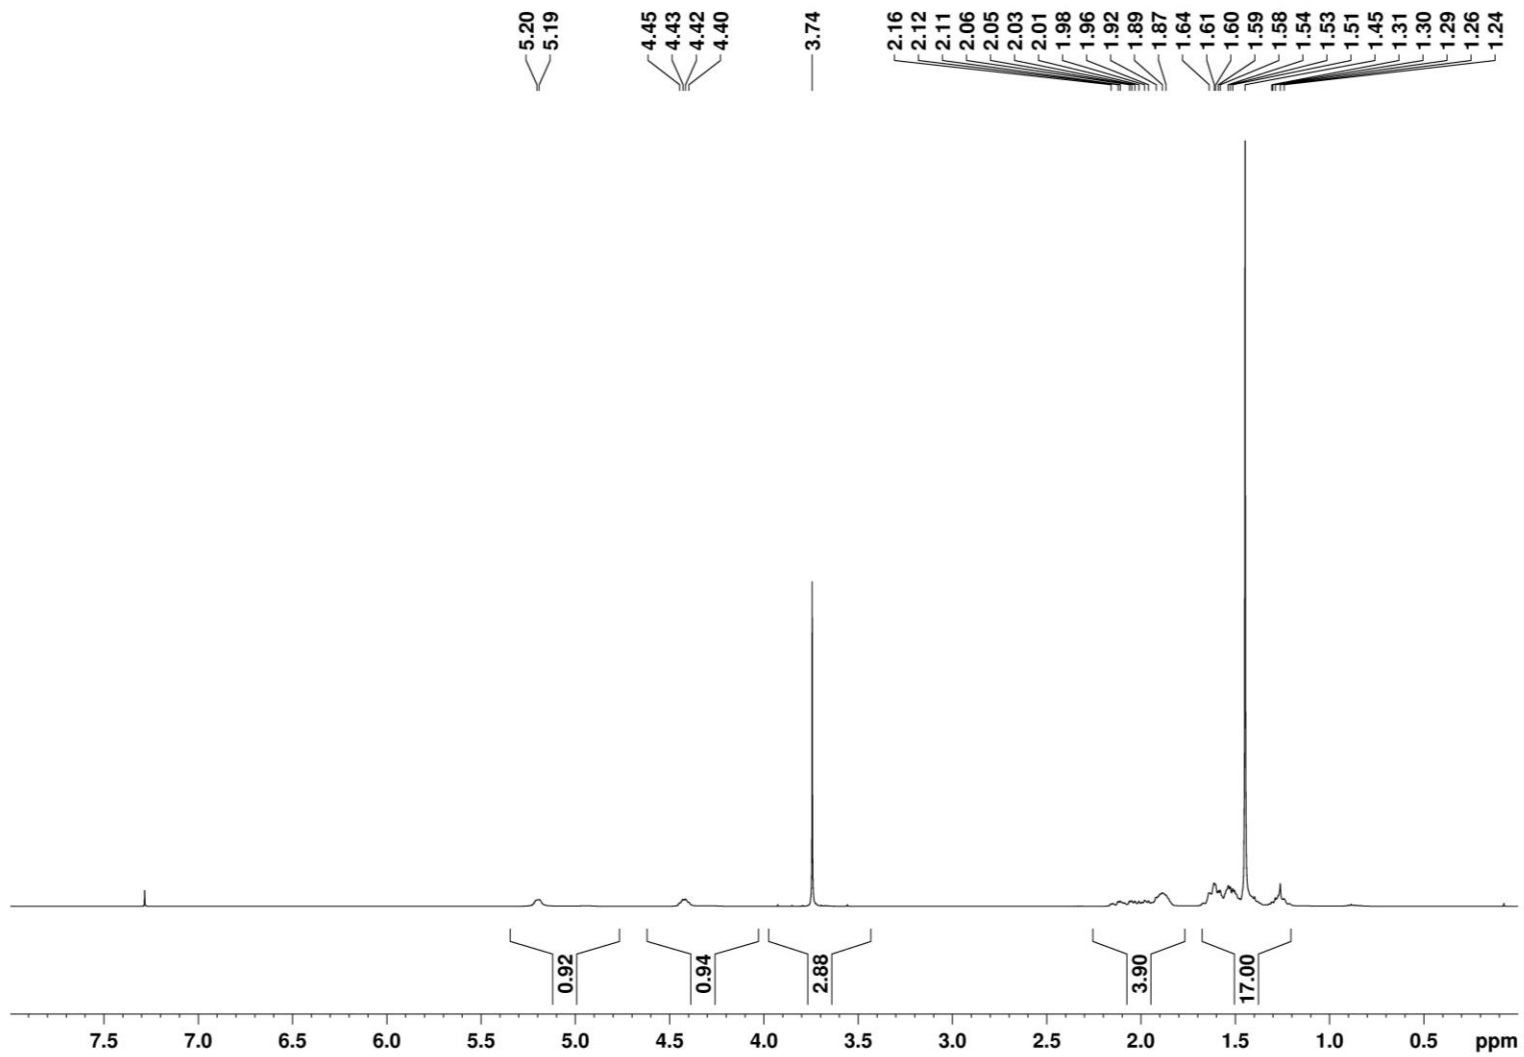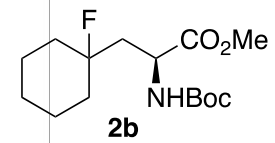

CDCl<sub>3</sub>, 400 MHz

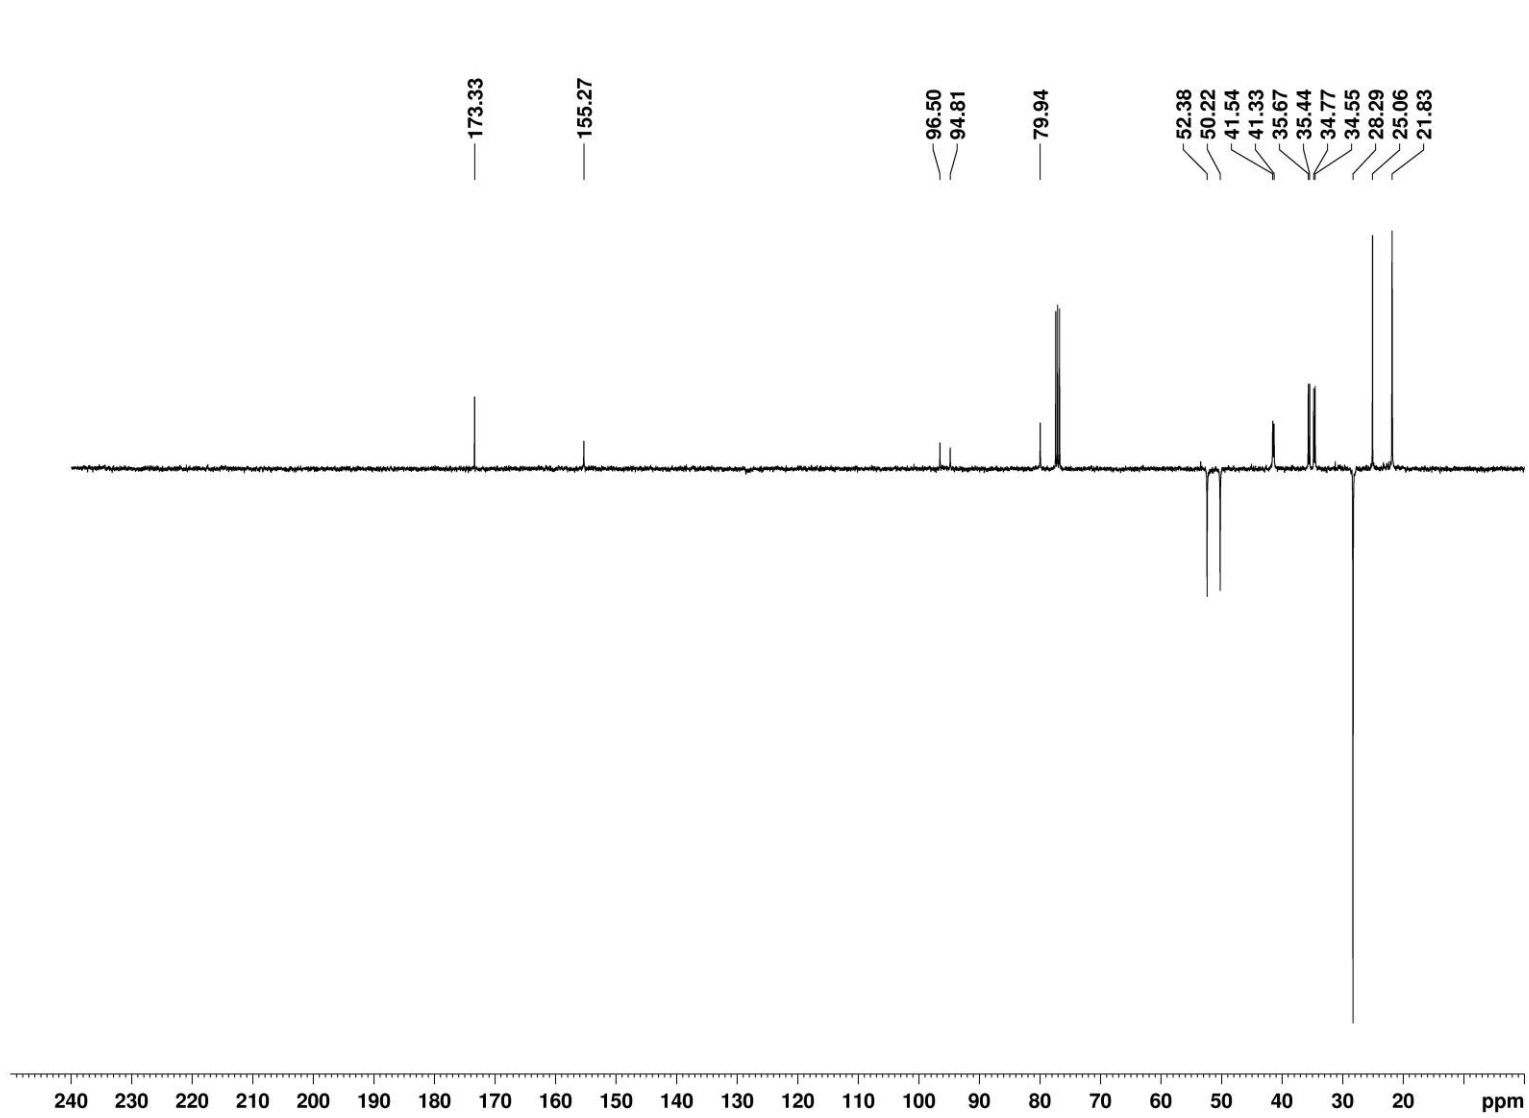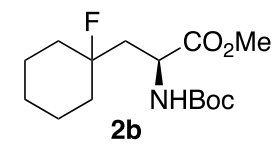

CDCl<sub>3</sub>, 100 MHz

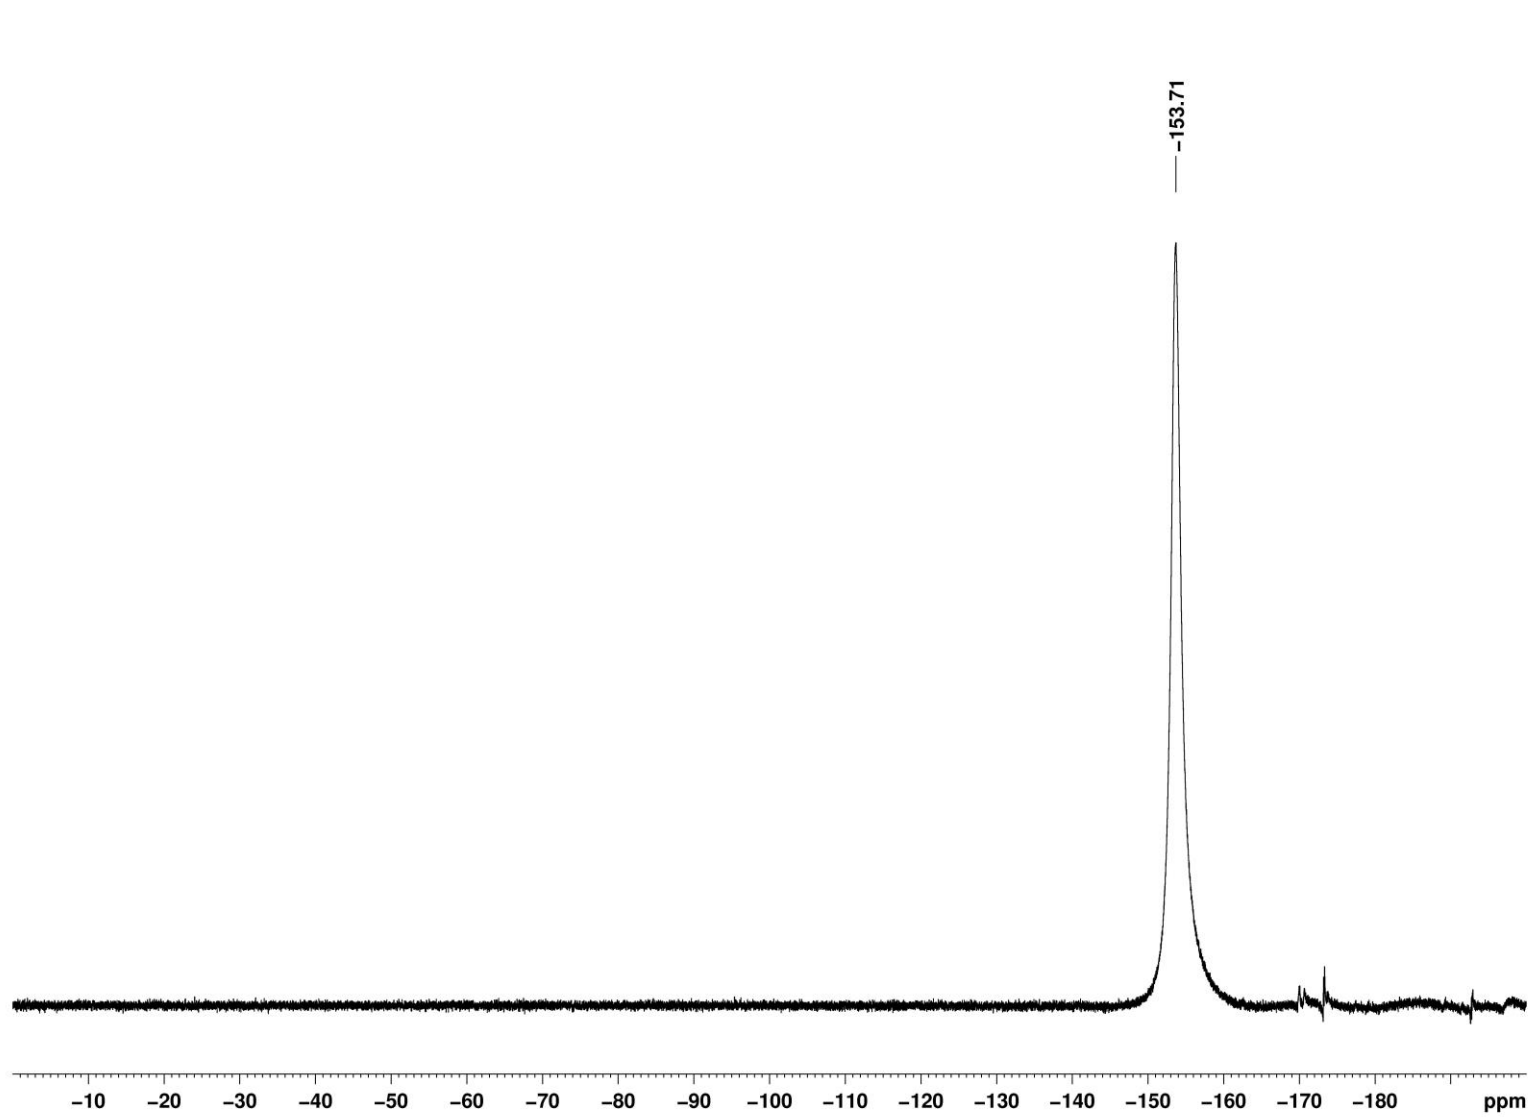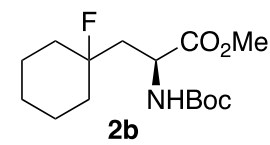

CDCl<sub>3</sub>, 377 MHz

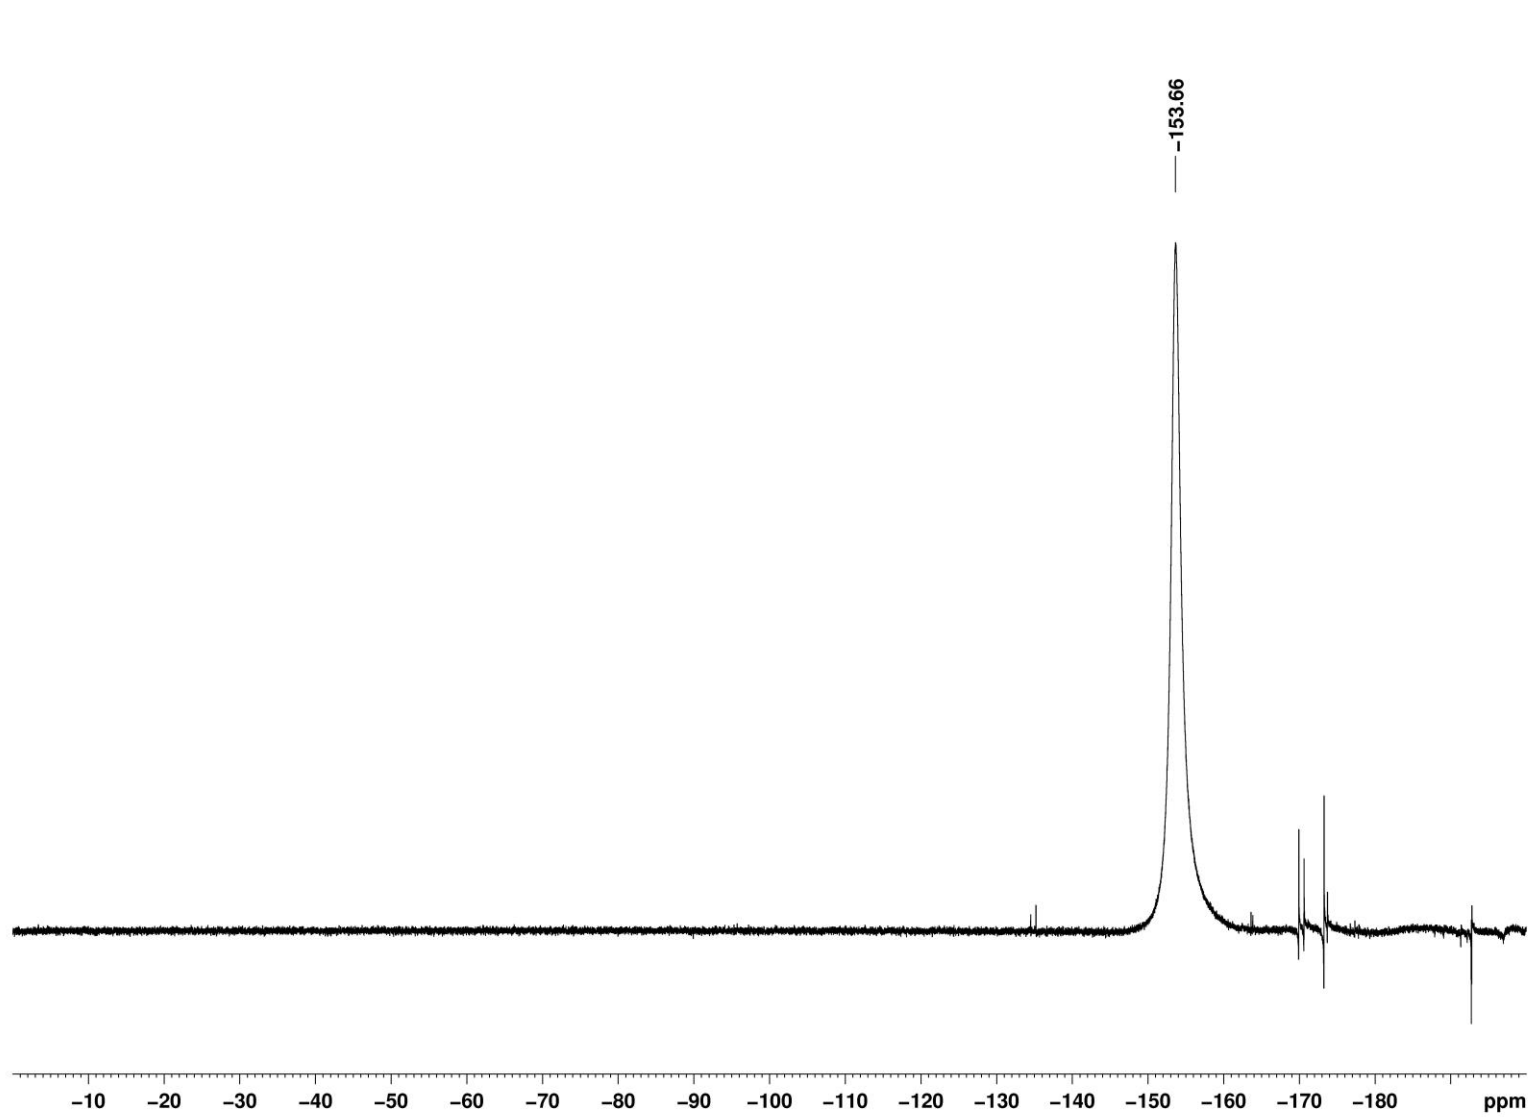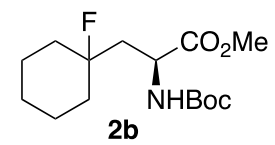

CDCl<sub>3</sub>, {<sup>1</sup>H} 377 MHz



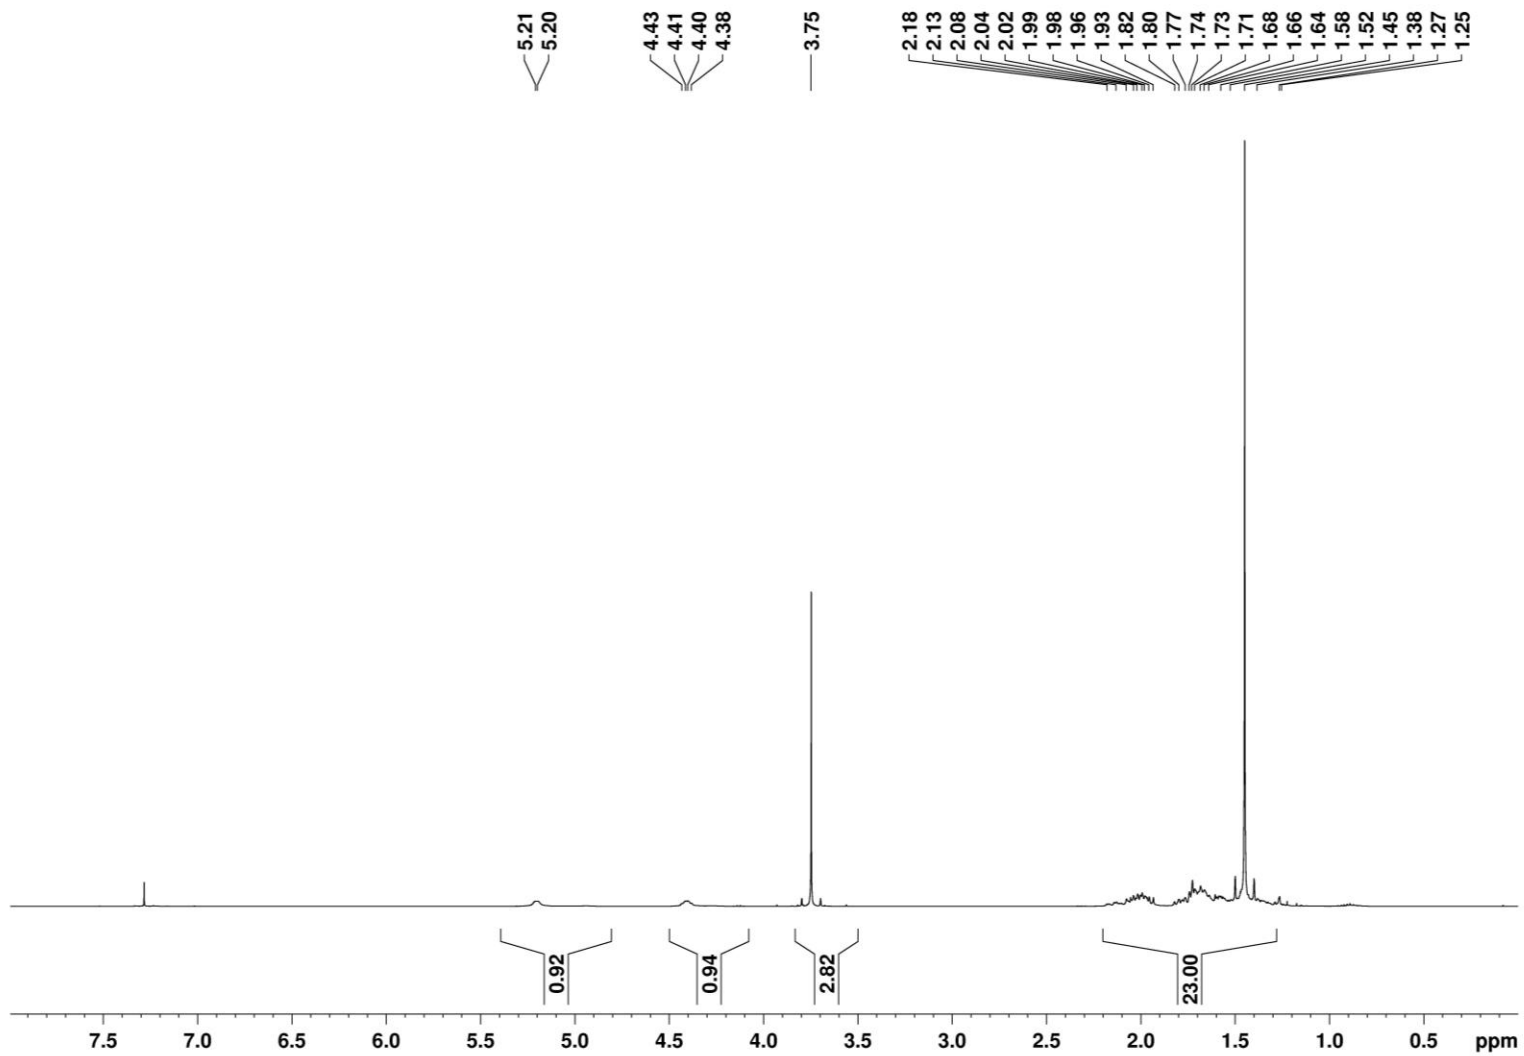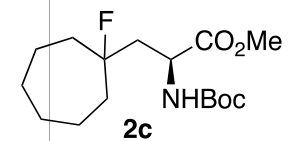

CDCl<sub>3</sub>, 400 MHz

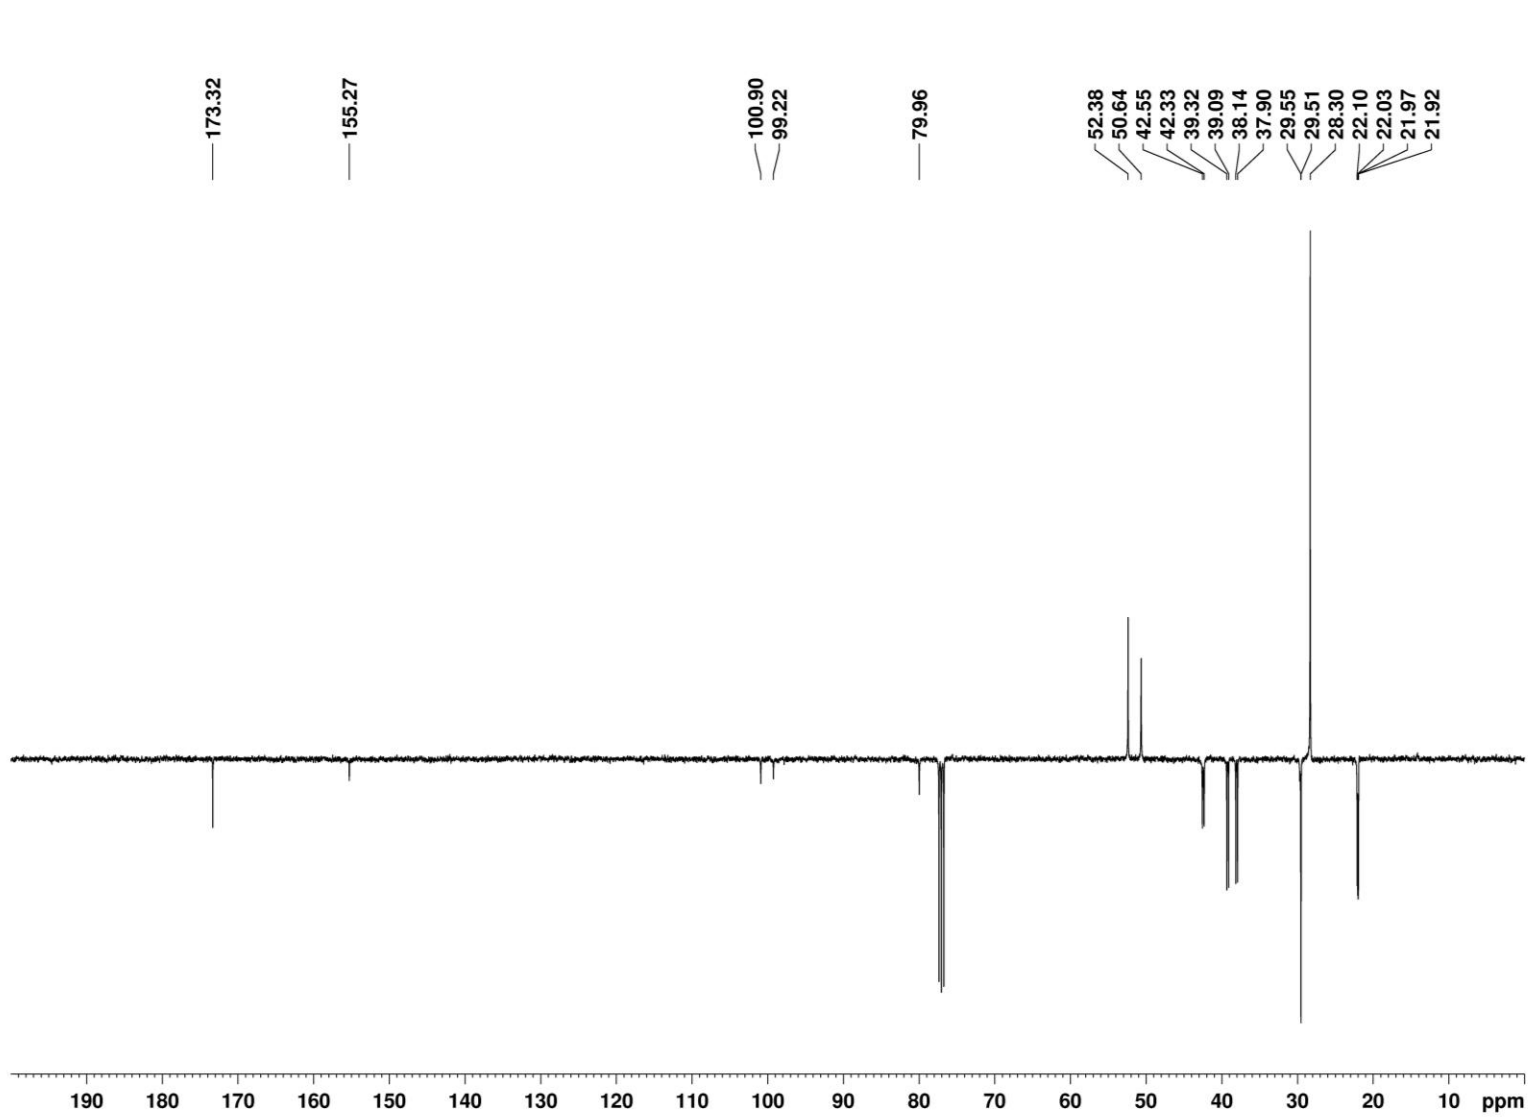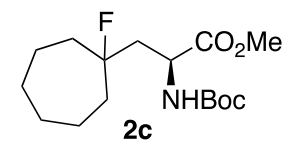

CDCl<sub>3</sub>, 100 MHz

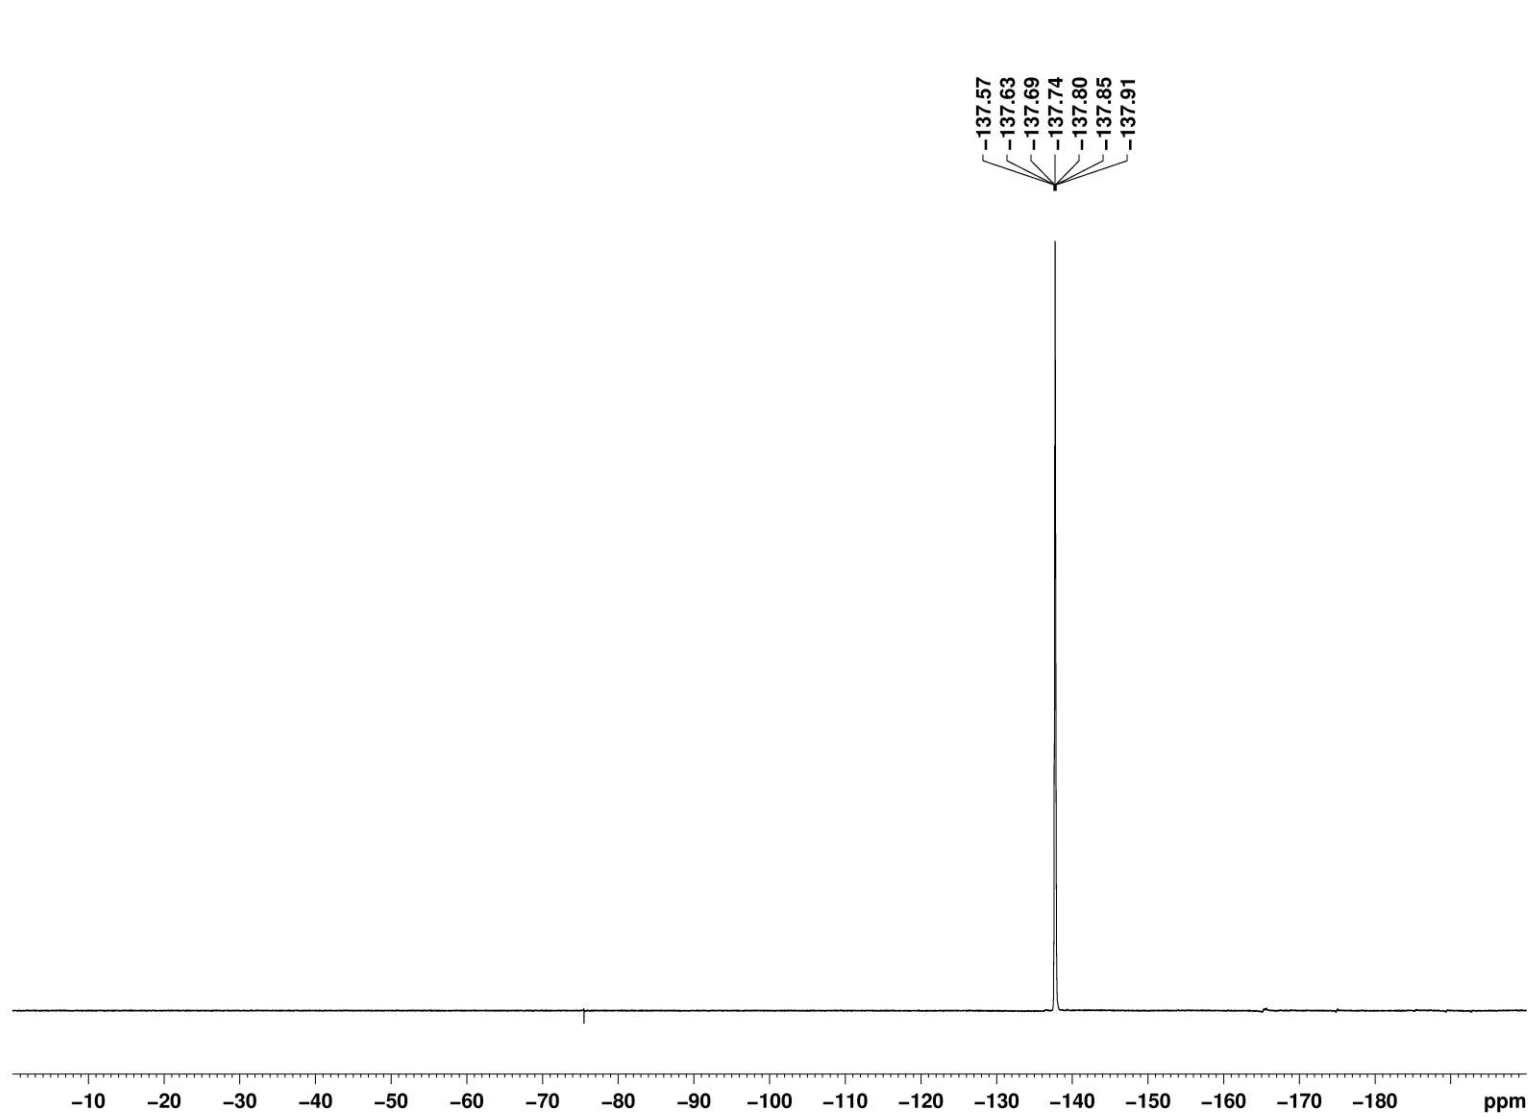

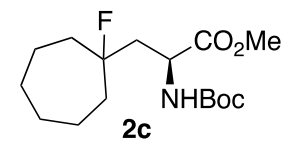

CDCl<sub>3</sub>, {<sup>1</sup>H} 377 MHz

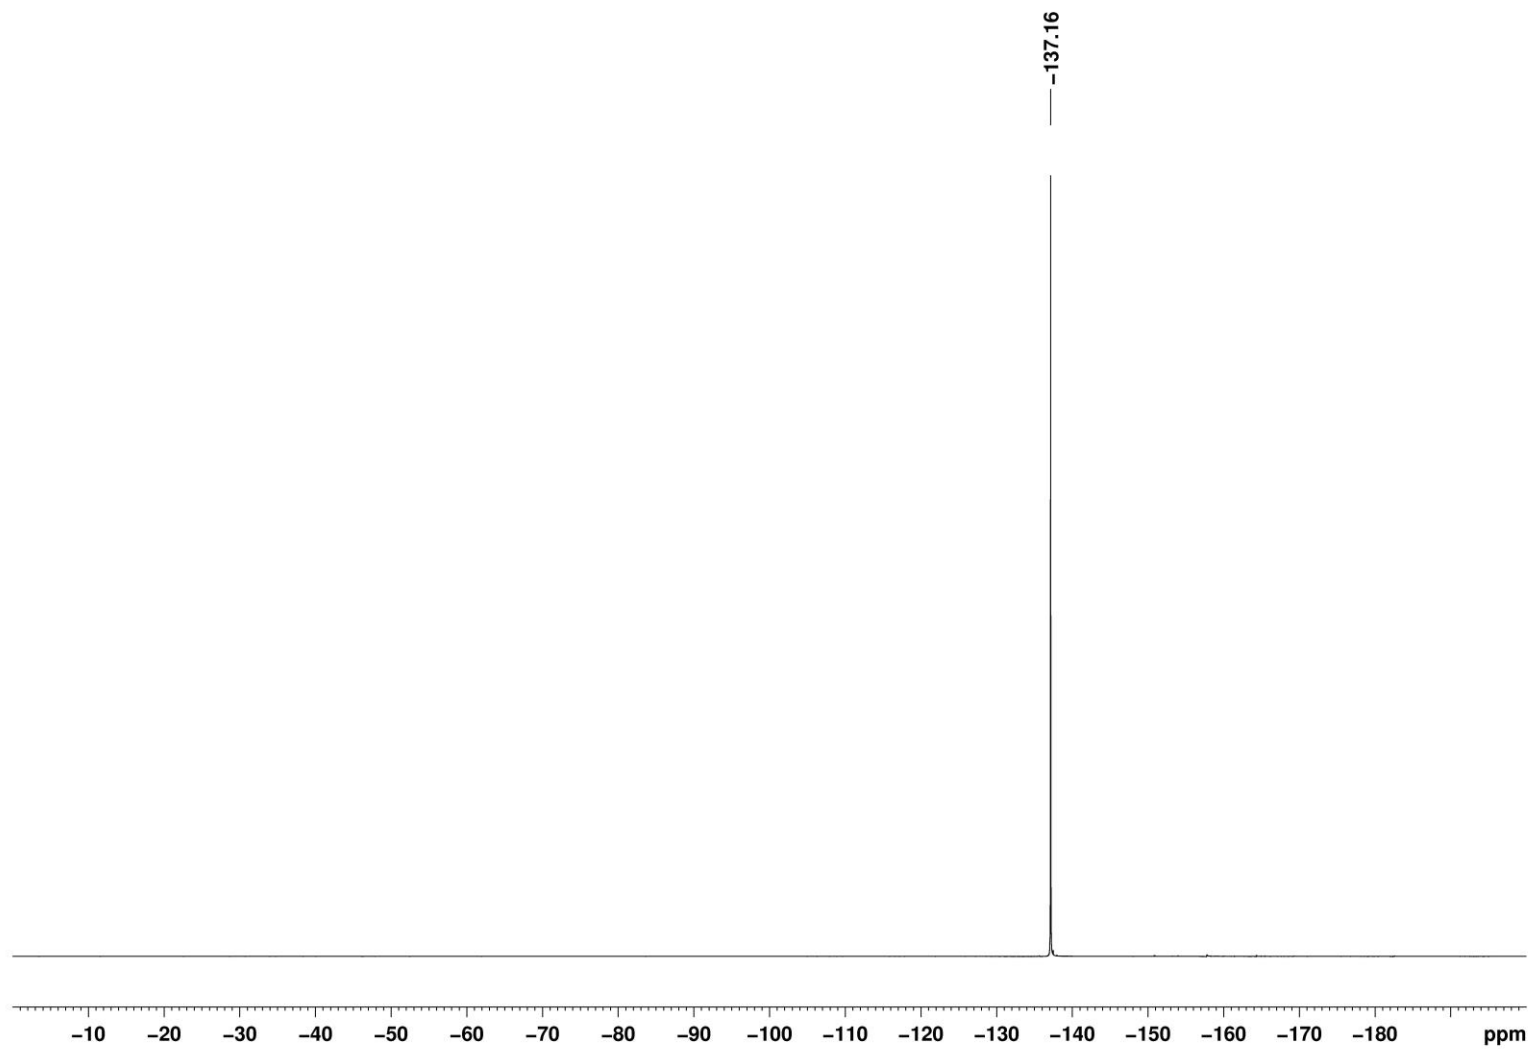

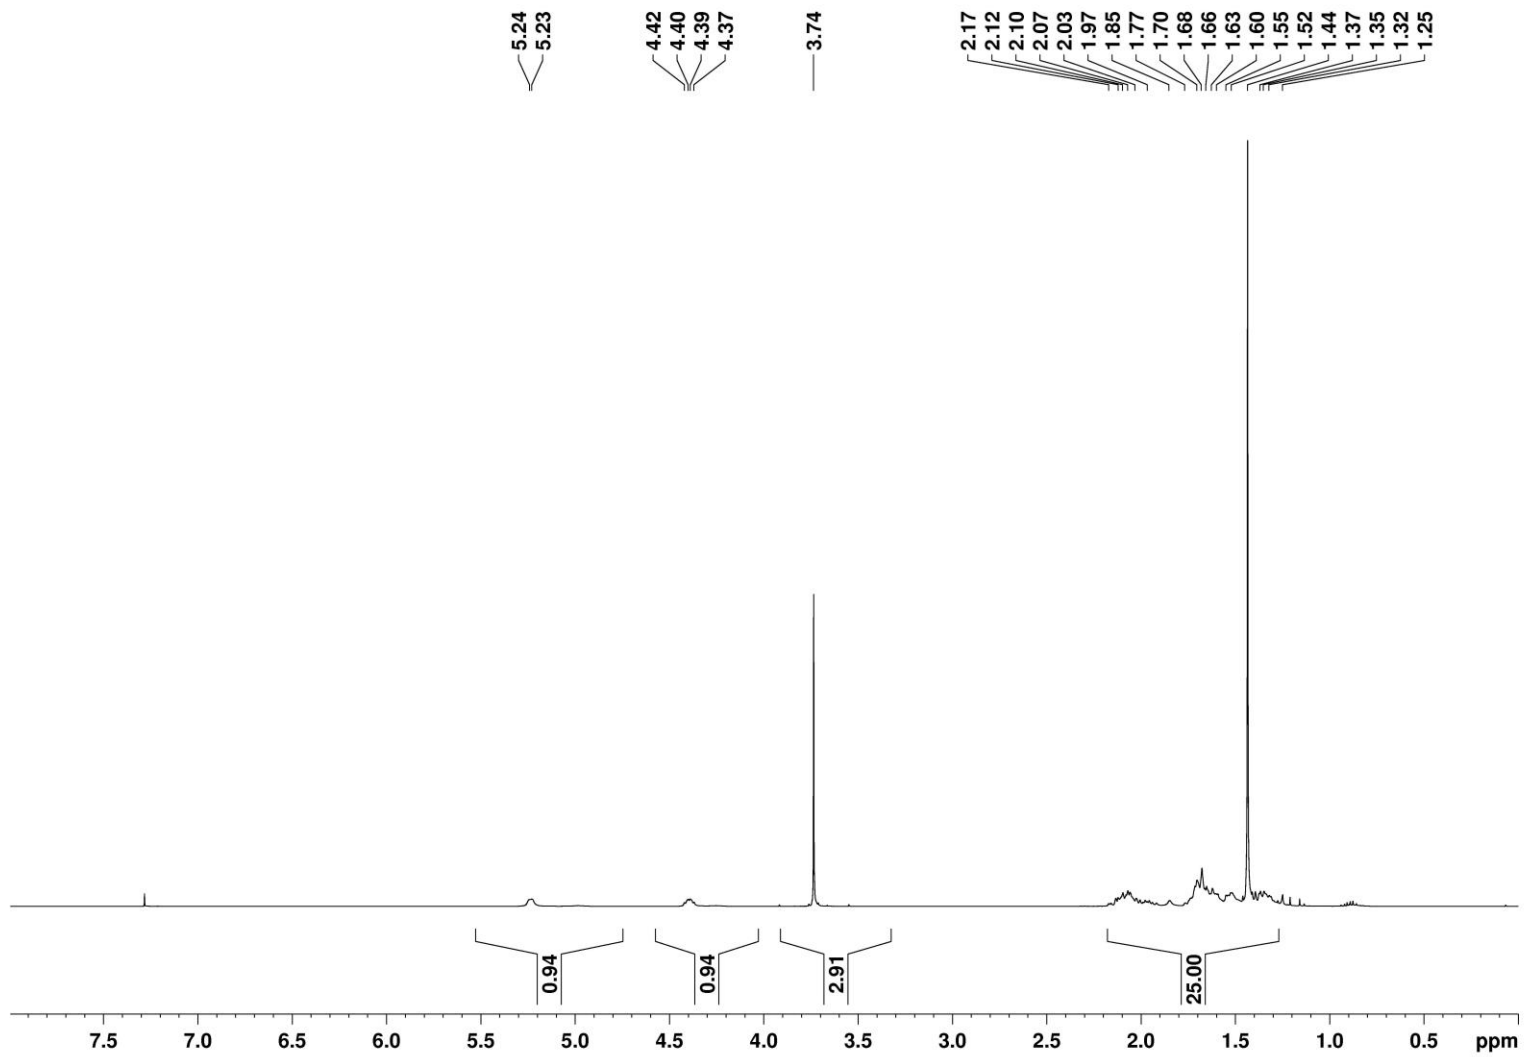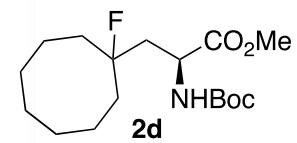

CDCl<sub>3</sub>, 400 MHz

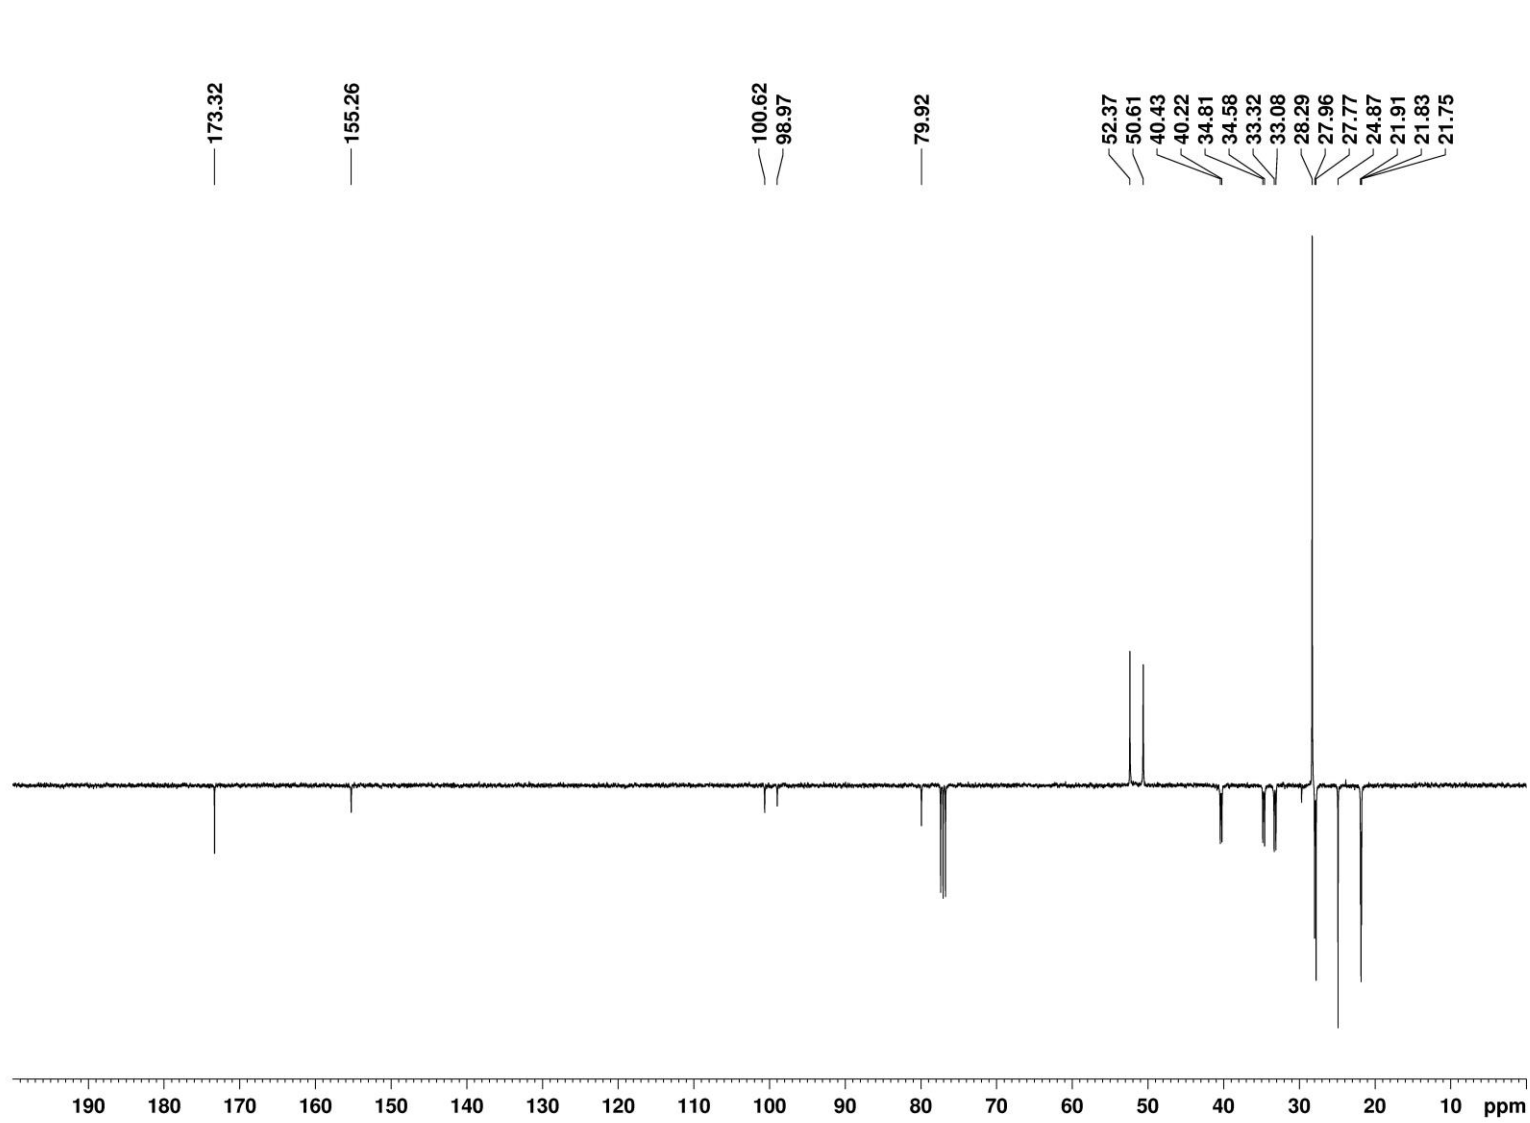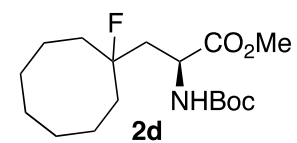

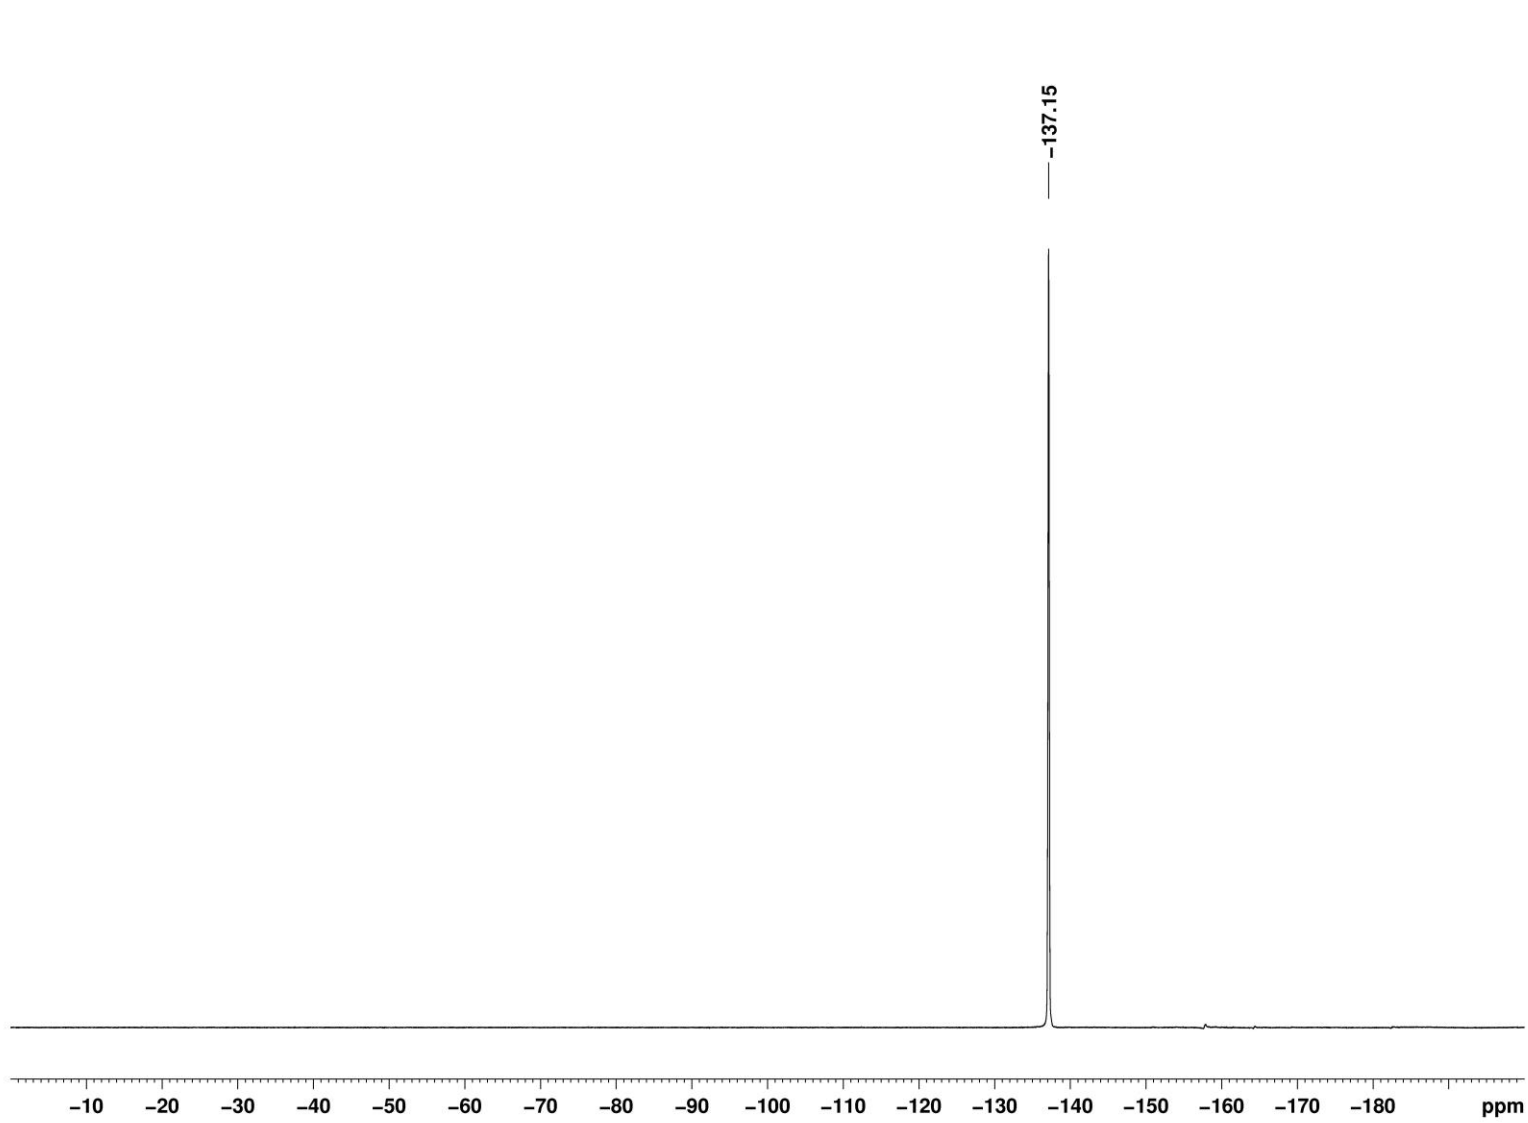

CDCl<sub>3</sub>, 377 MHz

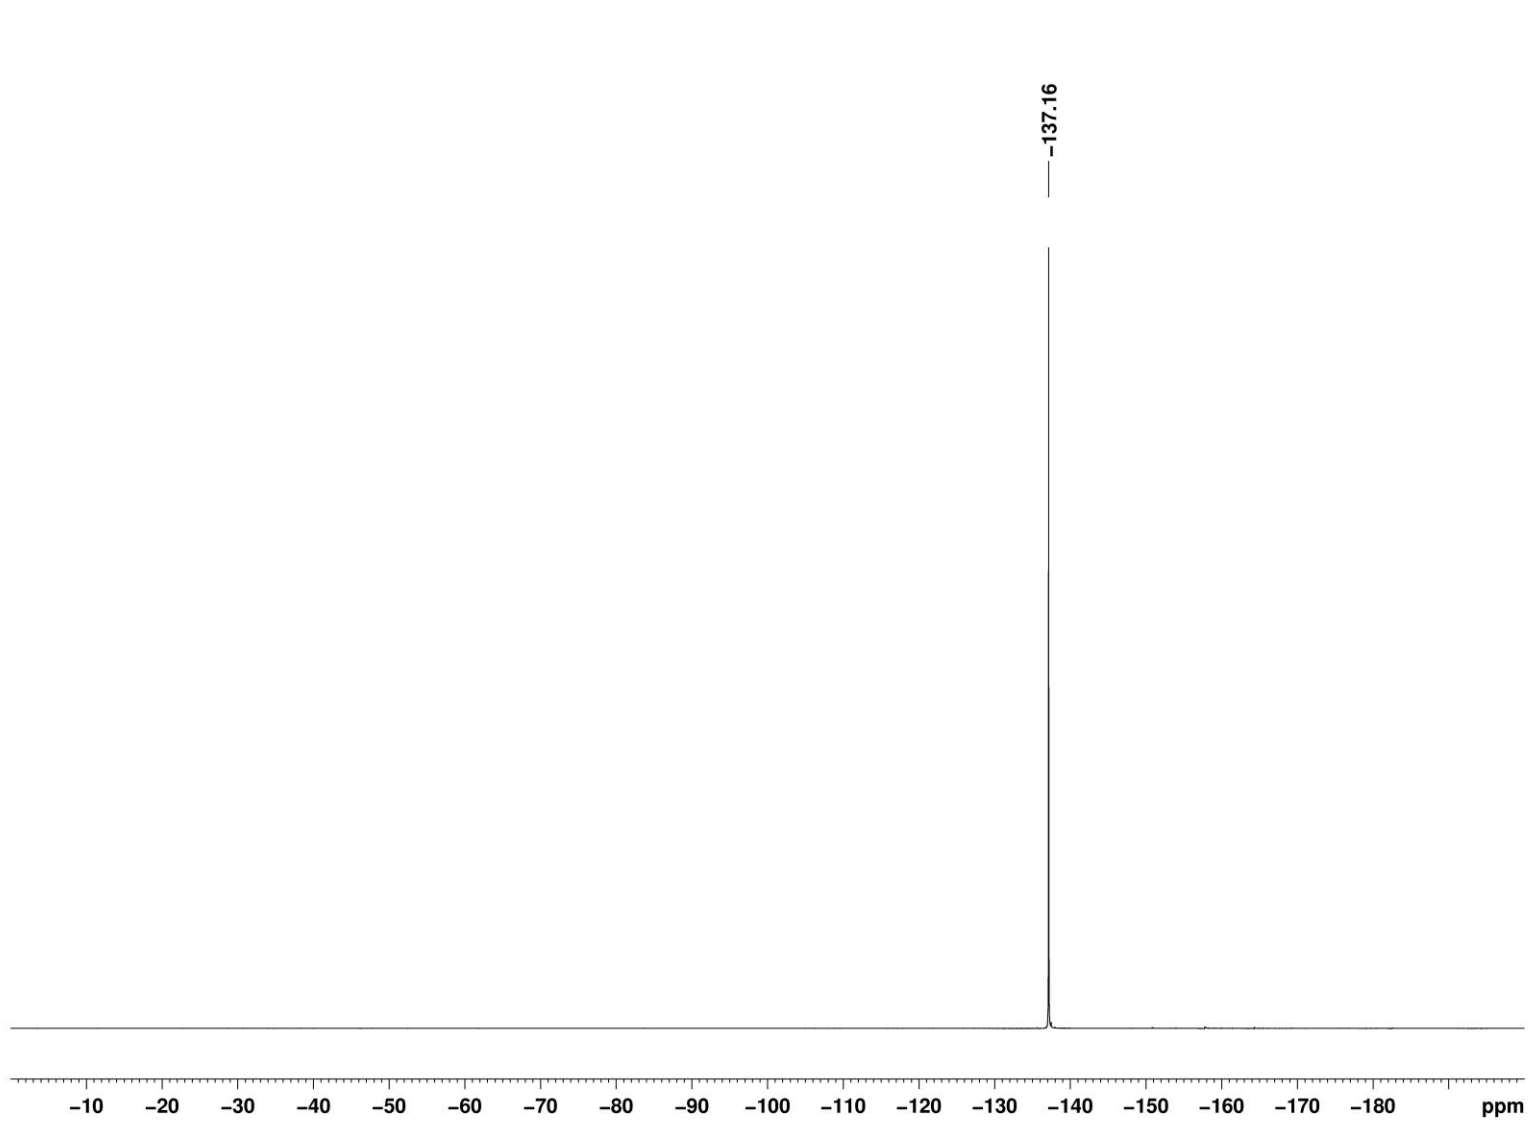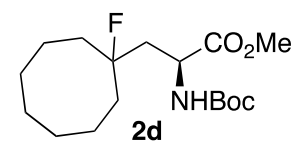

CDCl<sub>3</sub>, {<sup>1</sup>H} 377 MHz



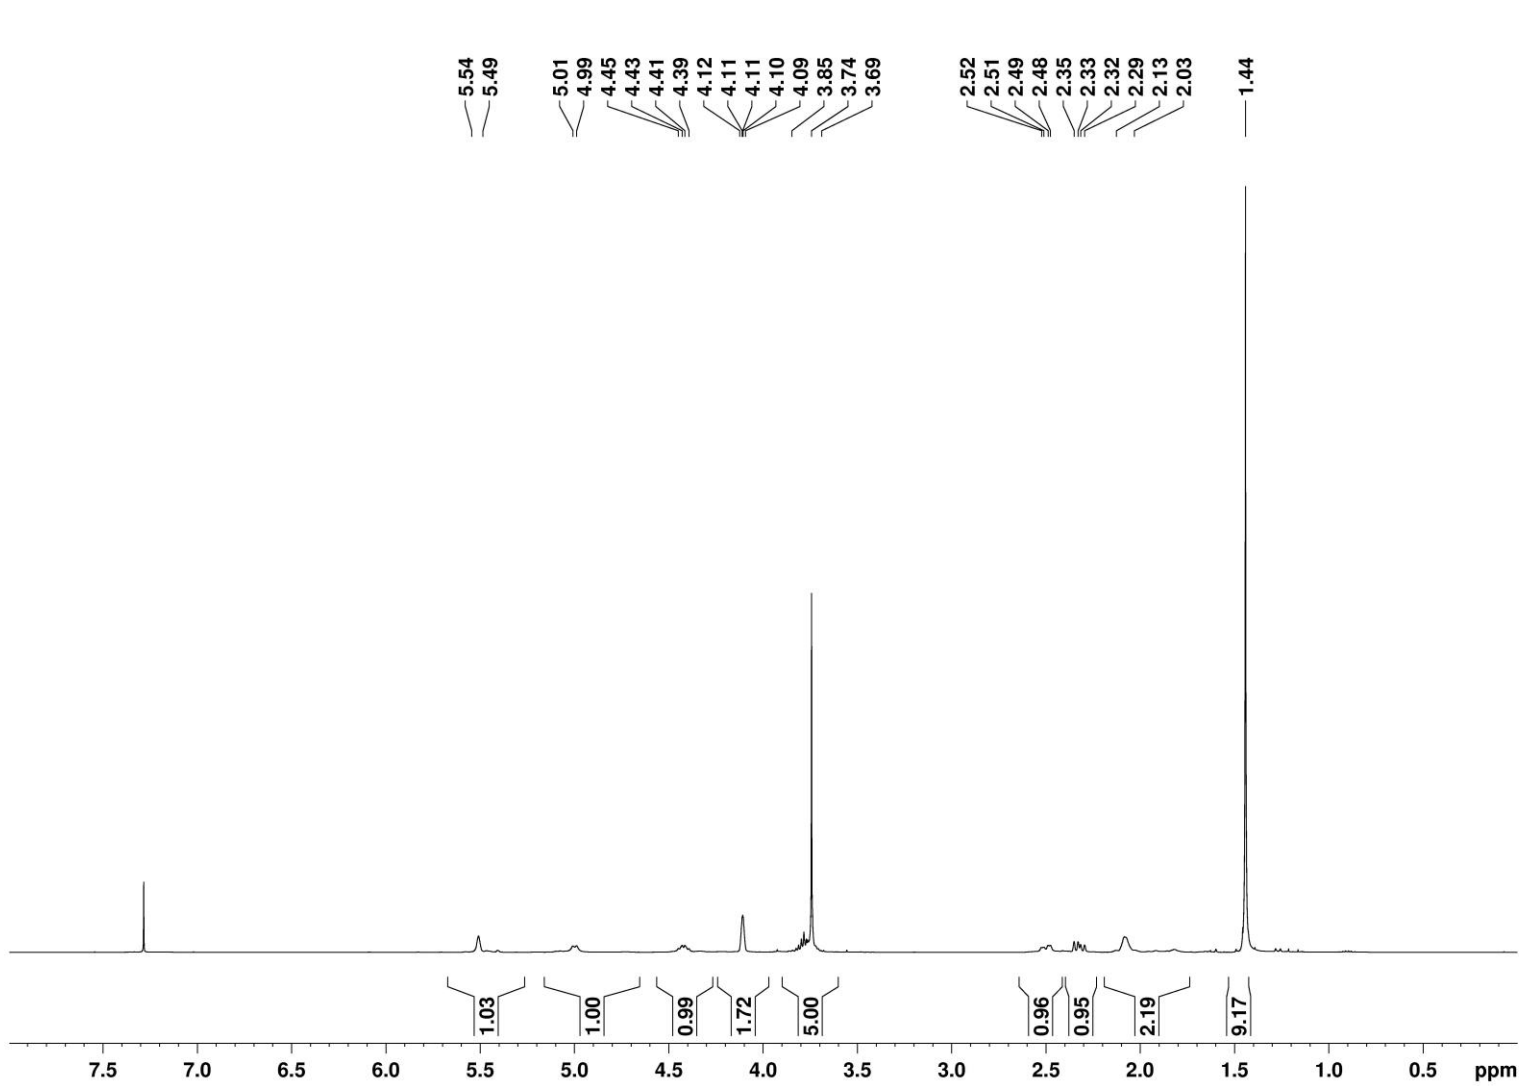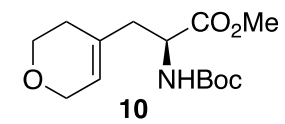

CDCl<sub>3</sub>, 400 MHz

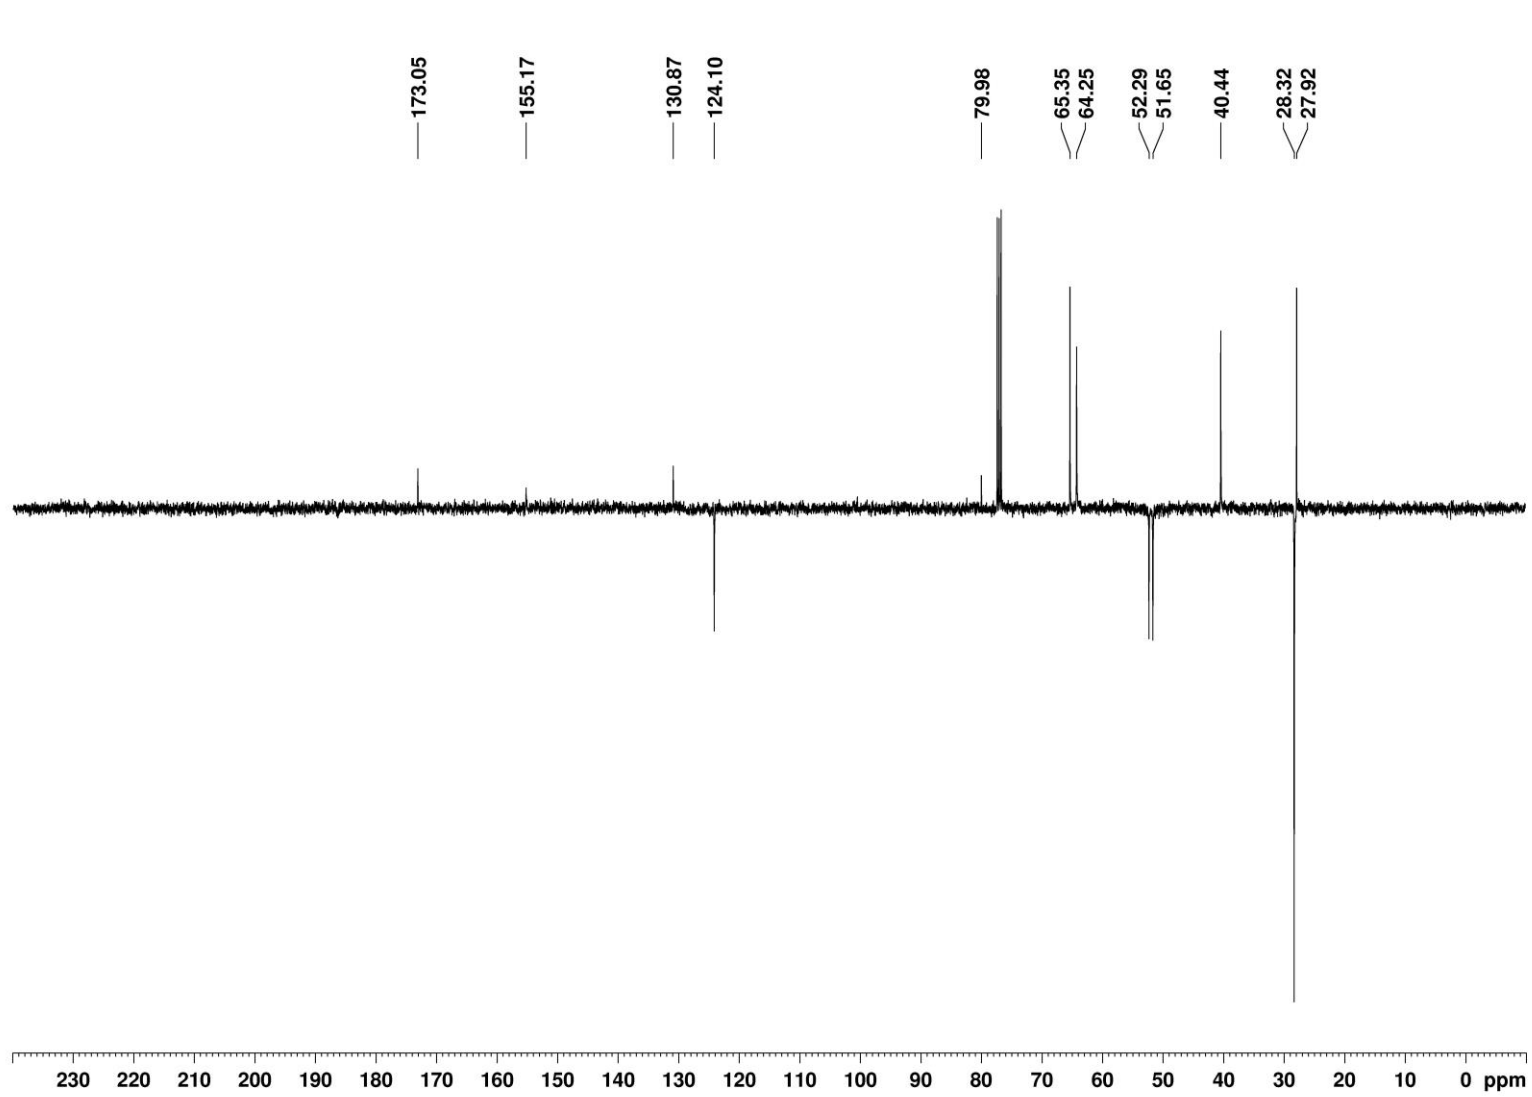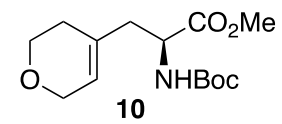

CDCl<sub>3</sub>, 100 MHz

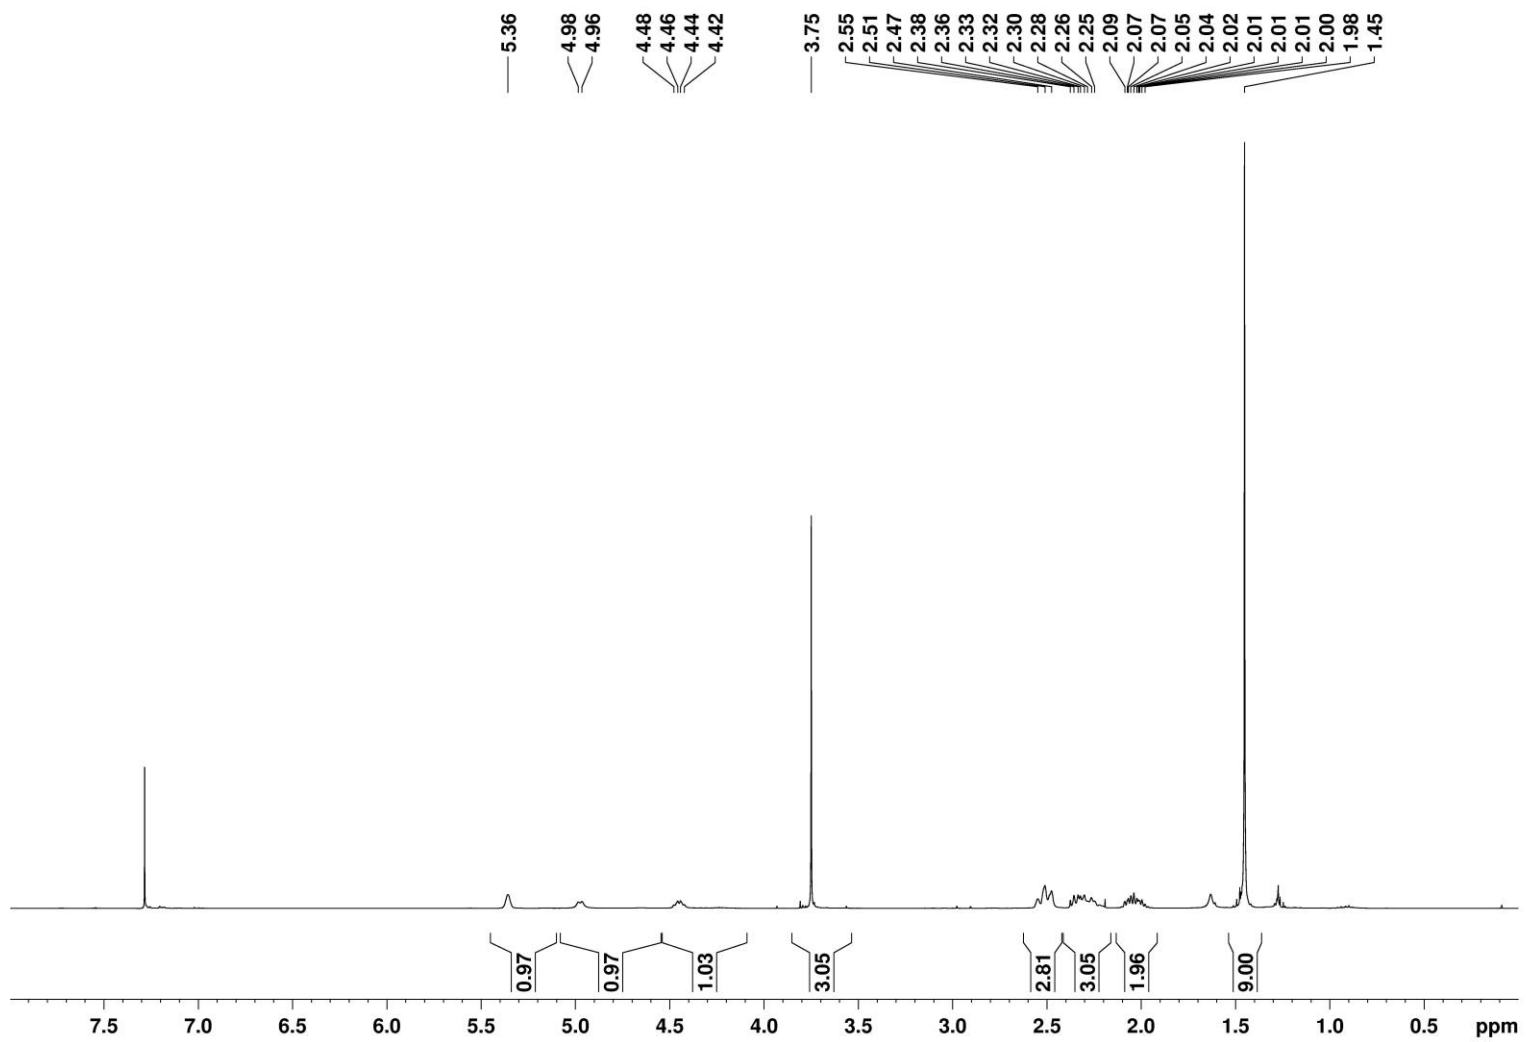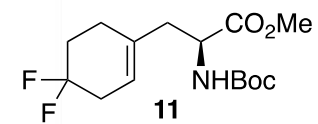

CDCl<sub>3</sub>, 400 MHz

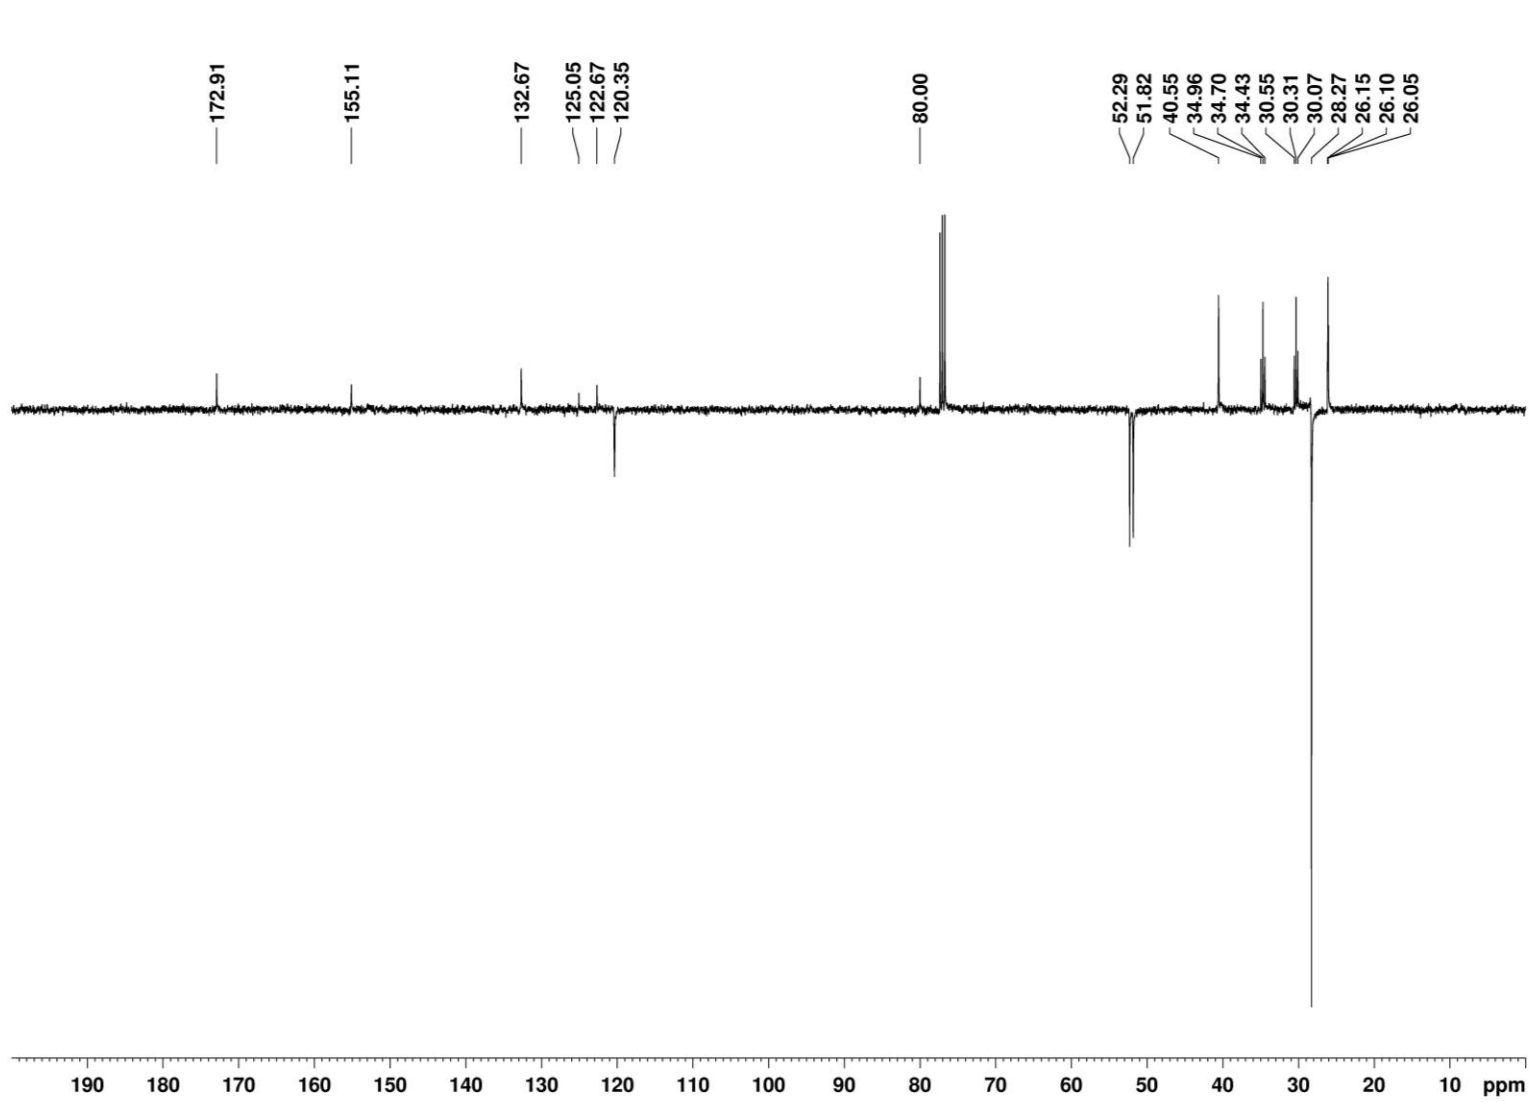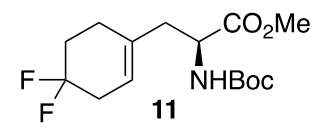

CDCl<sub>3</sub>, 100 MHz

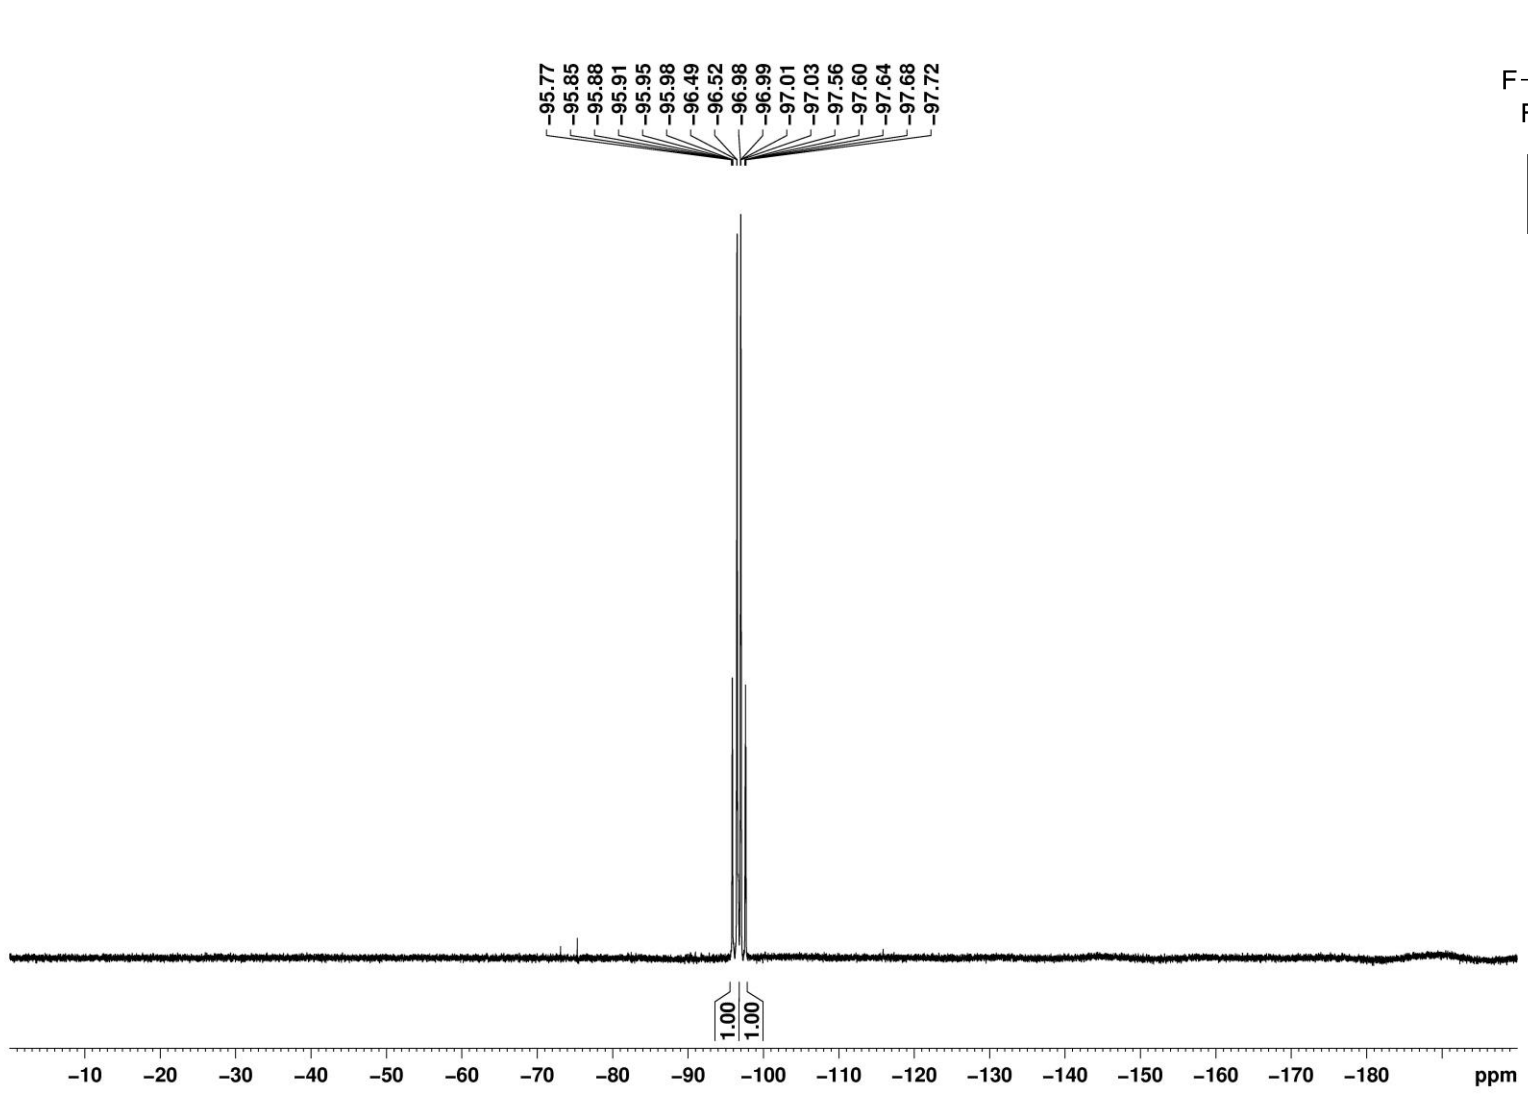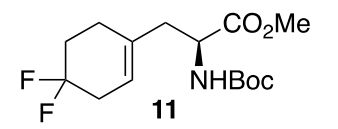

CDCl<sub>3</sub>, 377 MHz

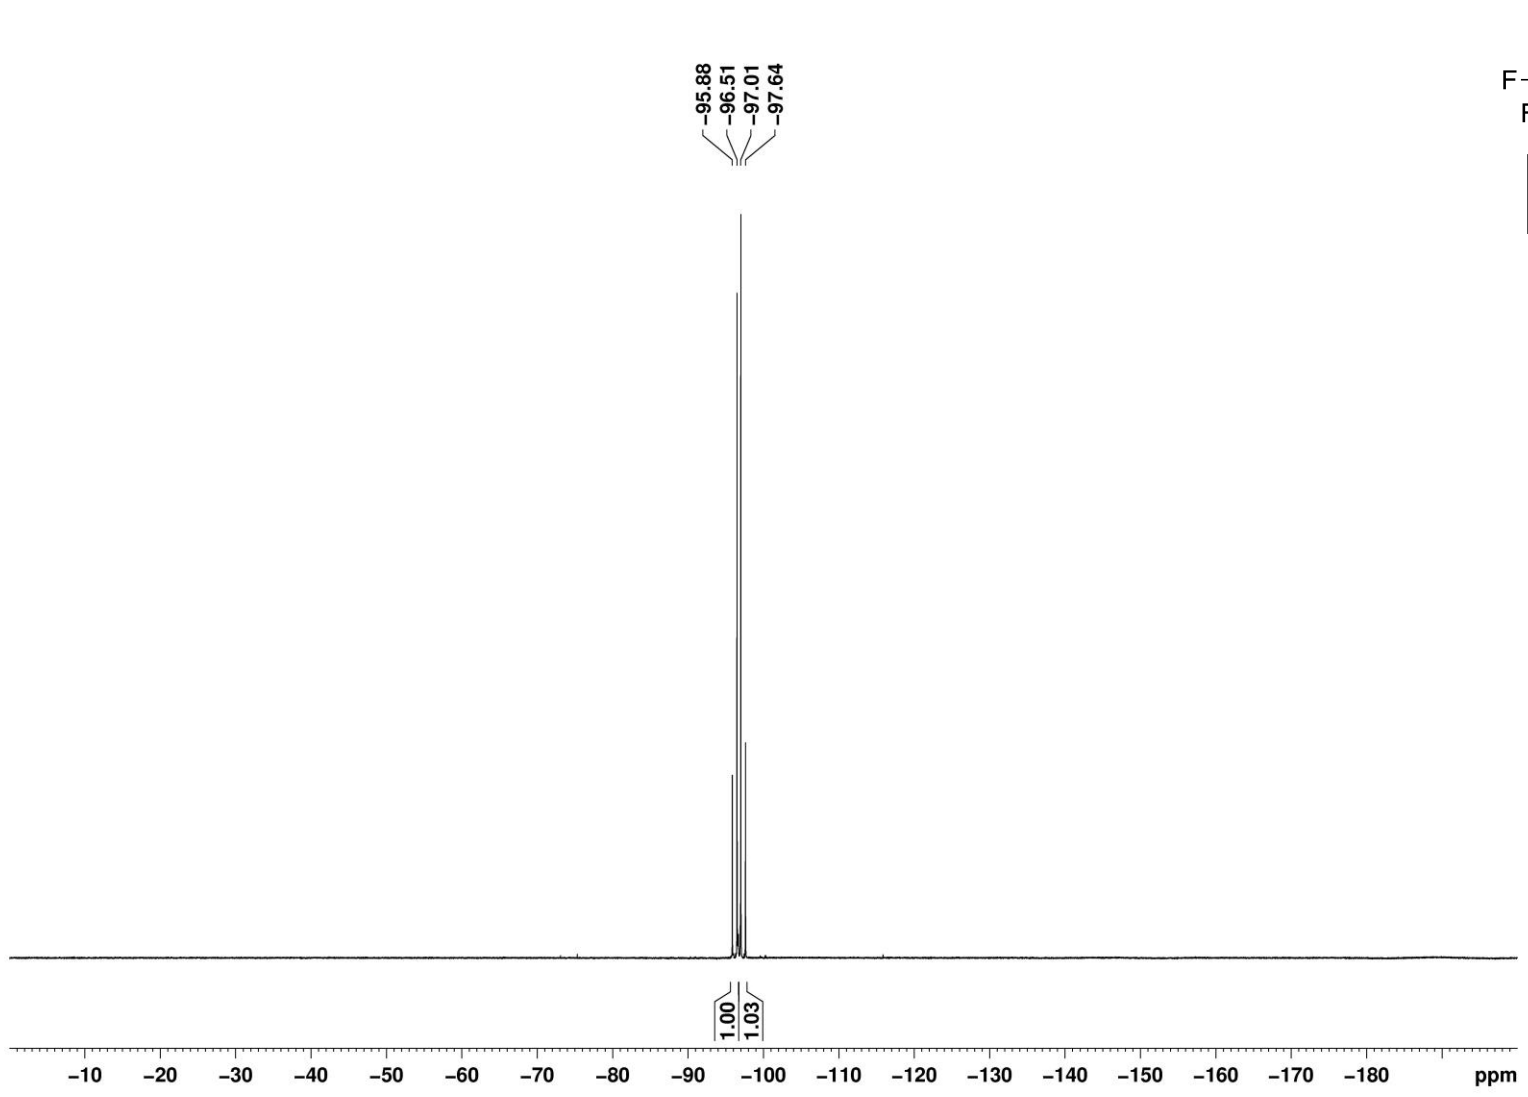

CDCl<sub>3</sub>, {<sup>1</sup>H} 377 MHz

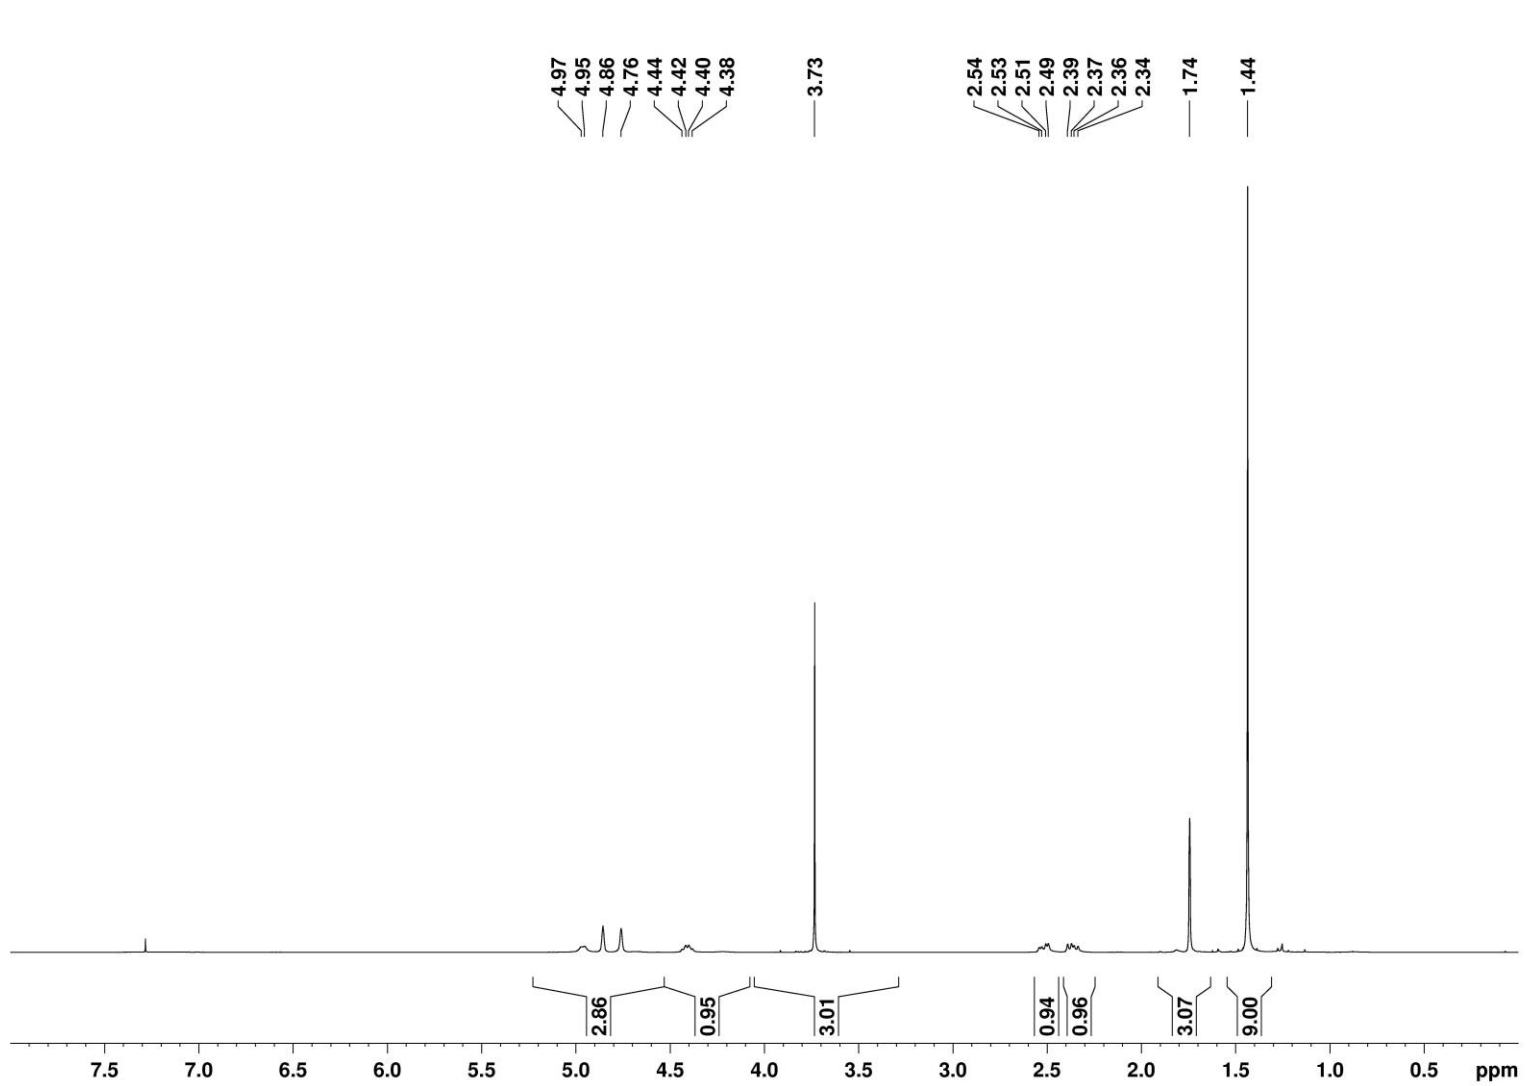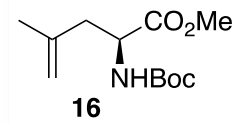

CDCl<sub>3</sub>, 400 MHz

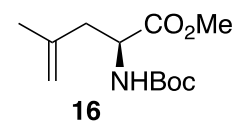

CDCl<sub>3</sub>, 100 MHz

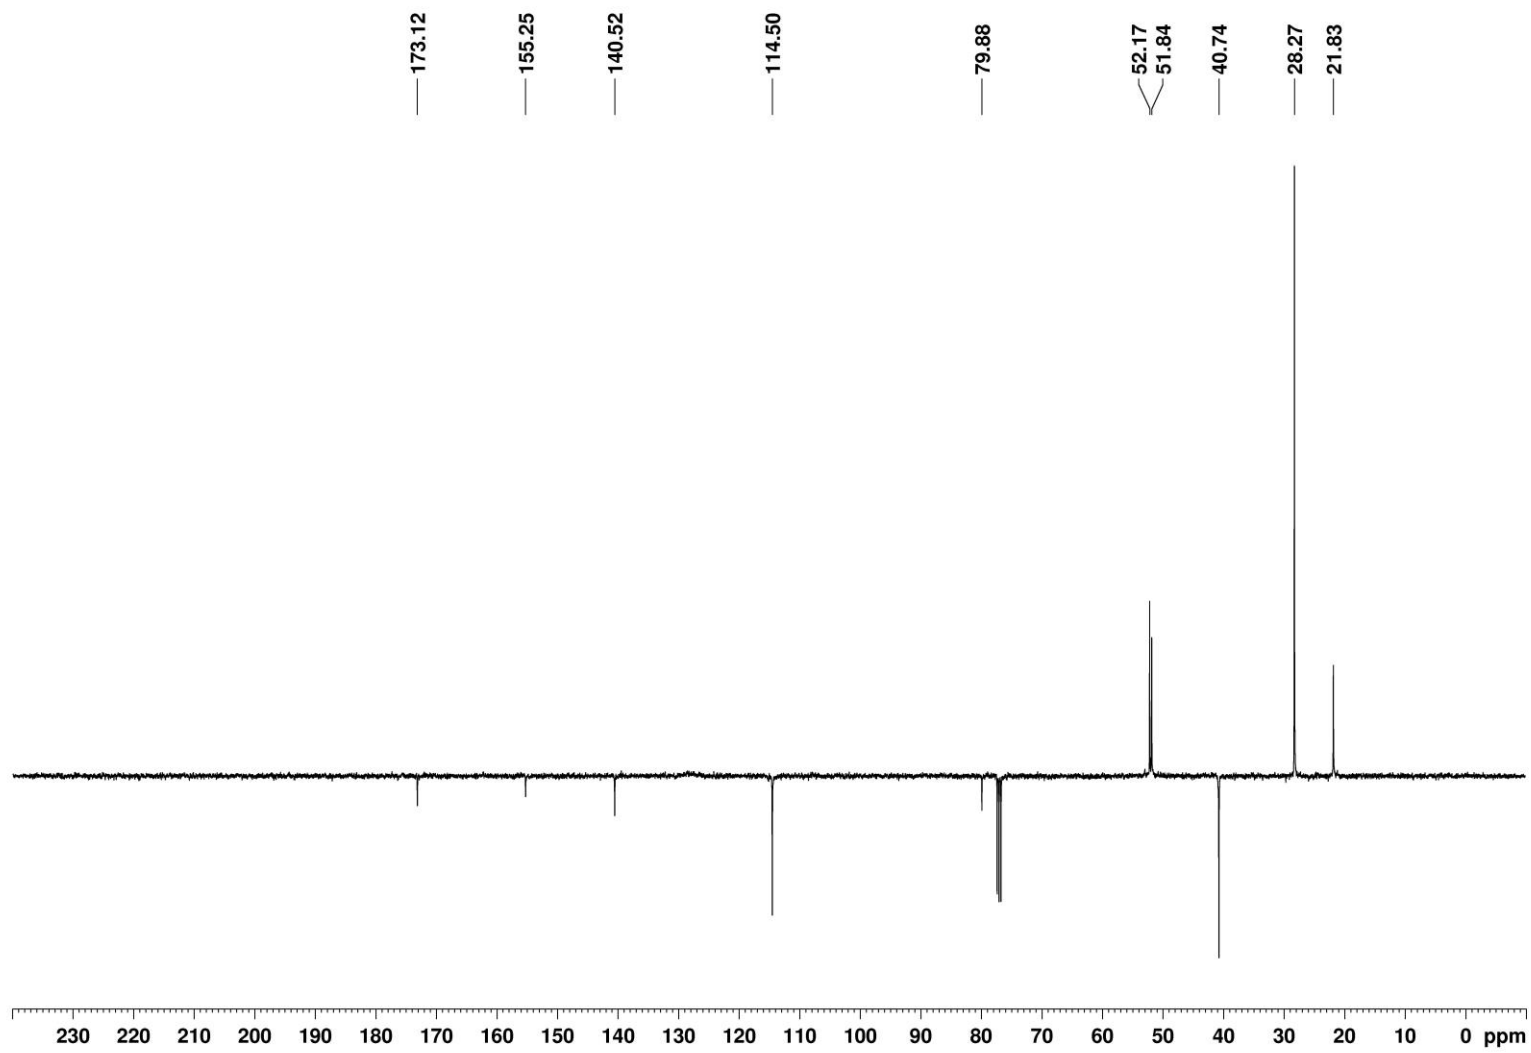



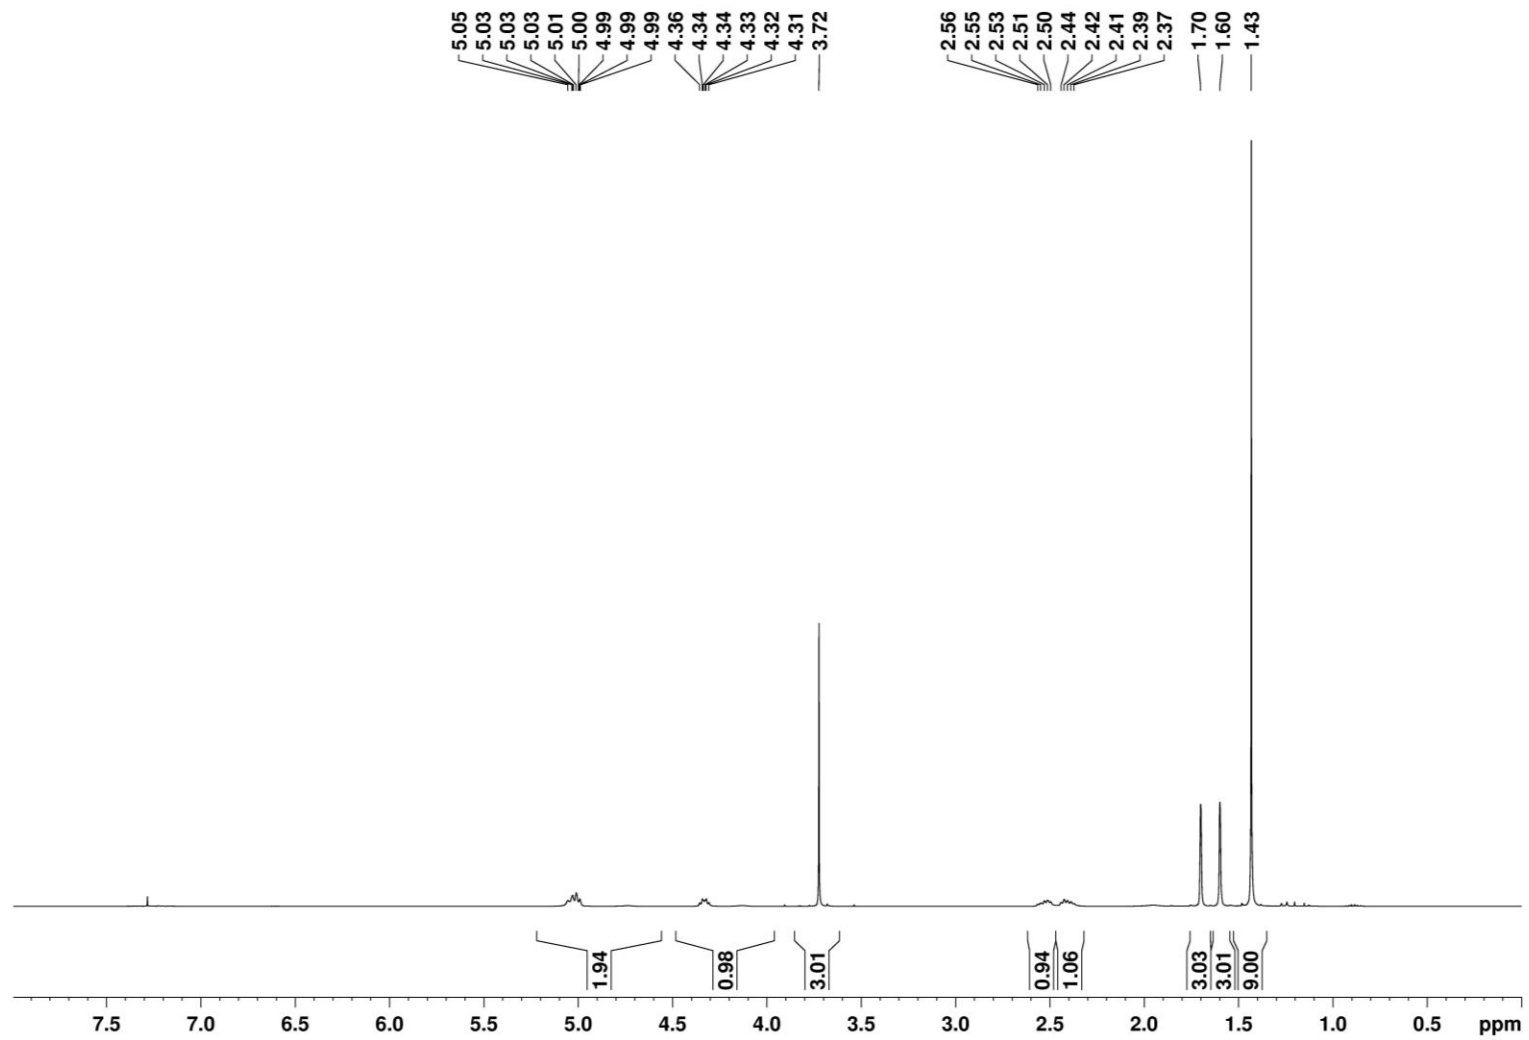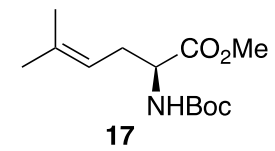

CDCl<sub>3</sub>, 400 MHz

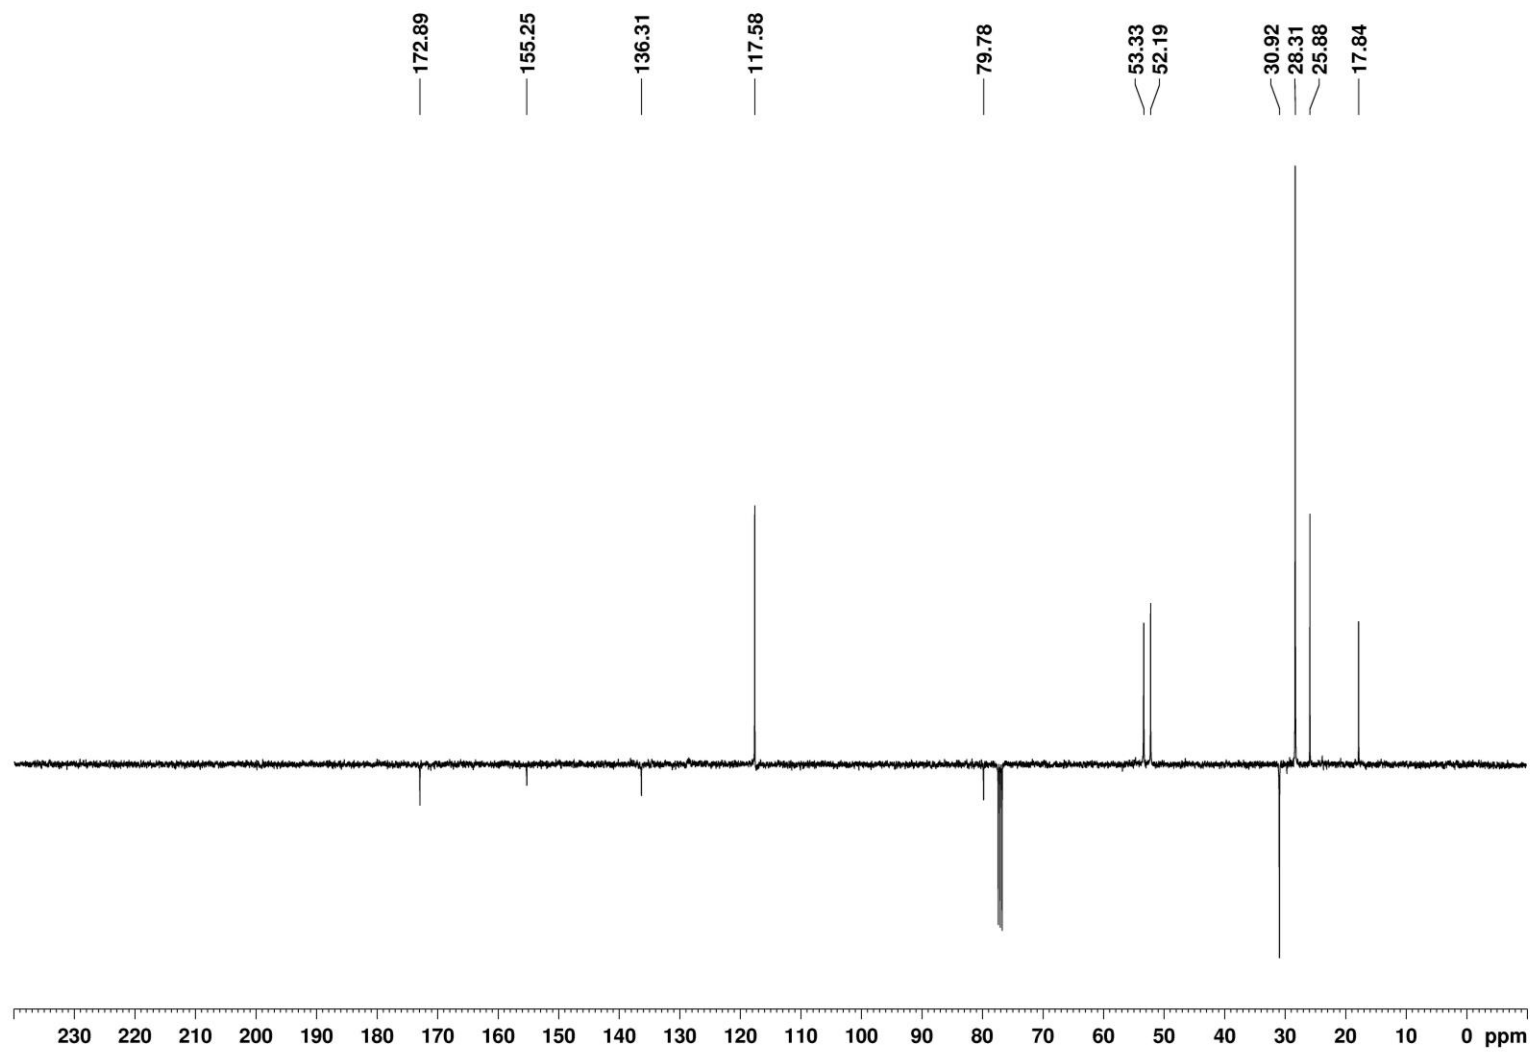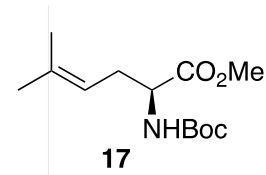

CDCl<sub>3</sub>, 100 MHz

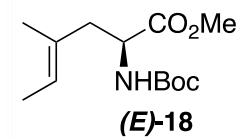

CDCl<sub>3</sub>, 400 MHz

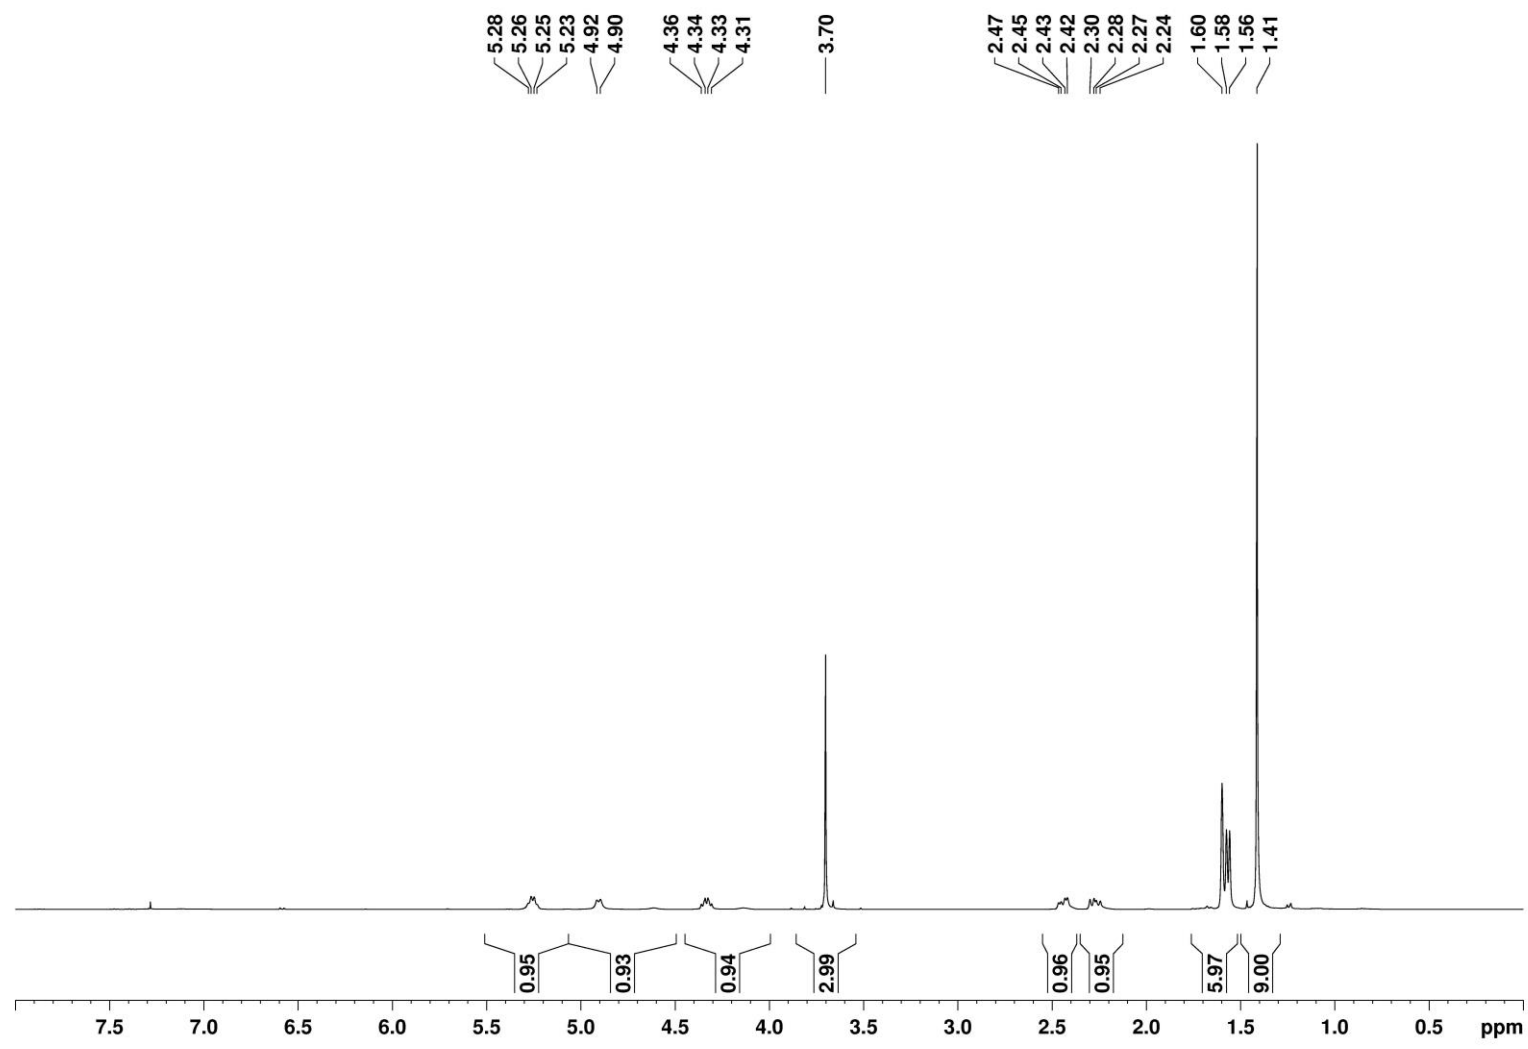

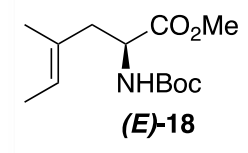

CDCl<sub>3</sub>, 100 MHz

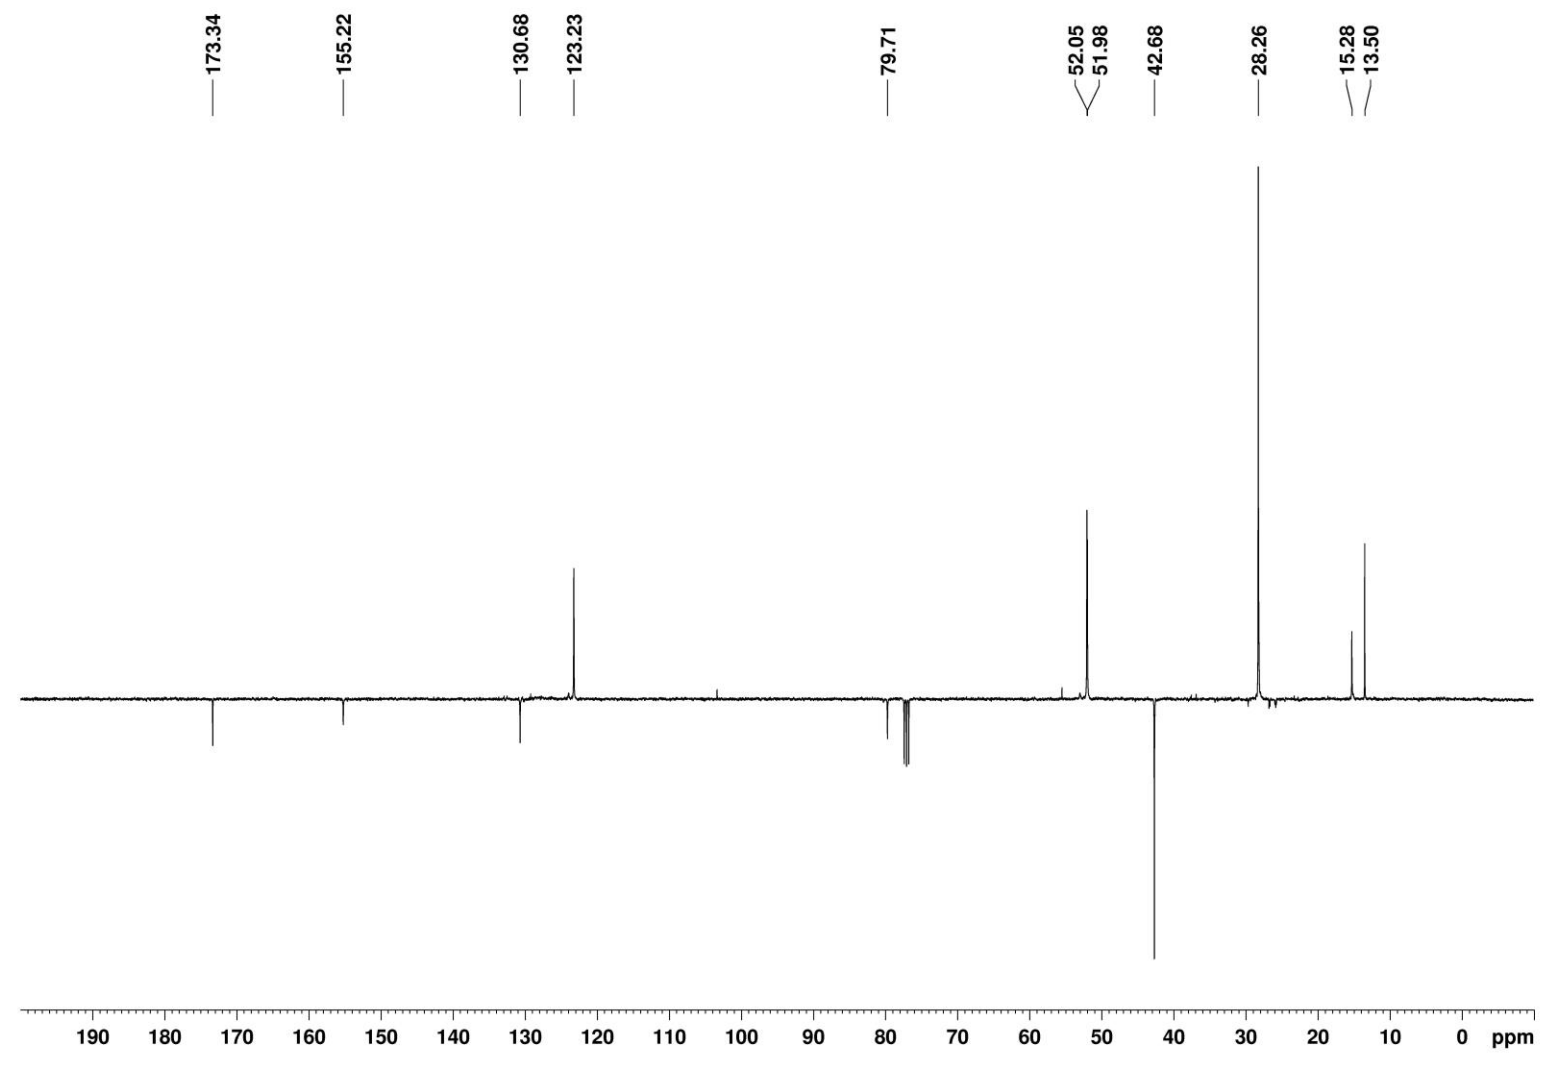

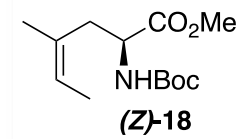

CDCl<sub>3</sub>, 400 MHz

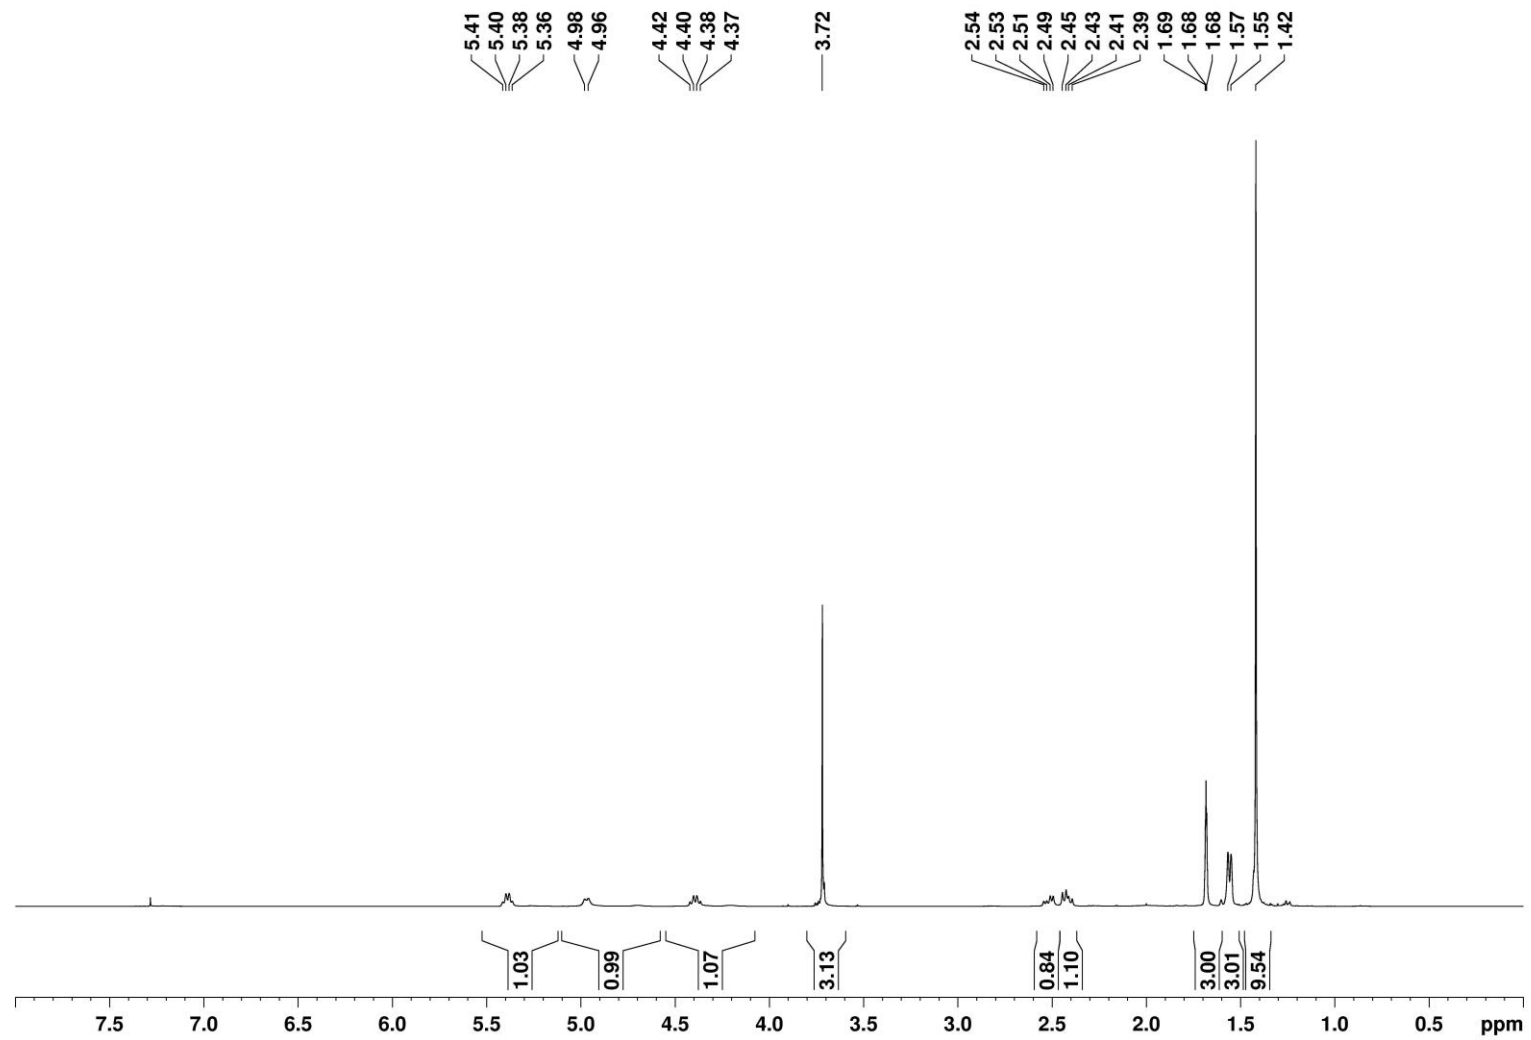

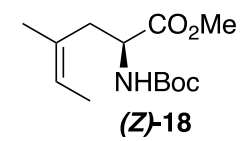

CDCl<sub>3</sub>, 100 MHz

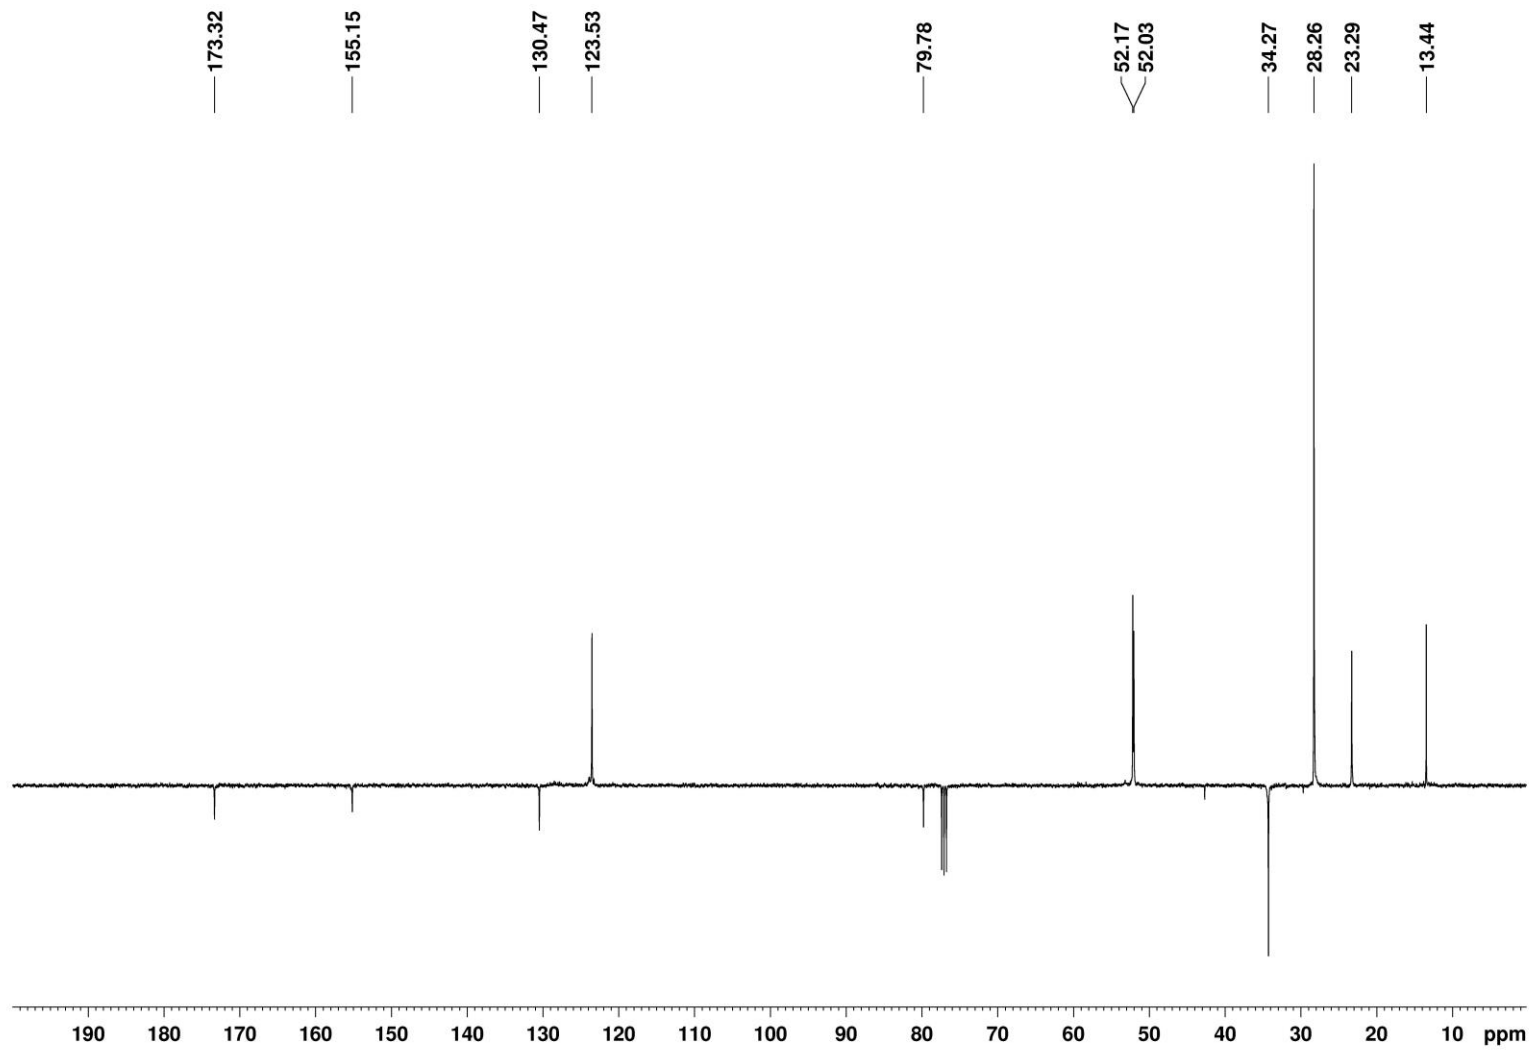

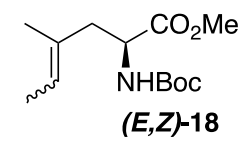

CDCl<sub>3</sub>, 400 MHz

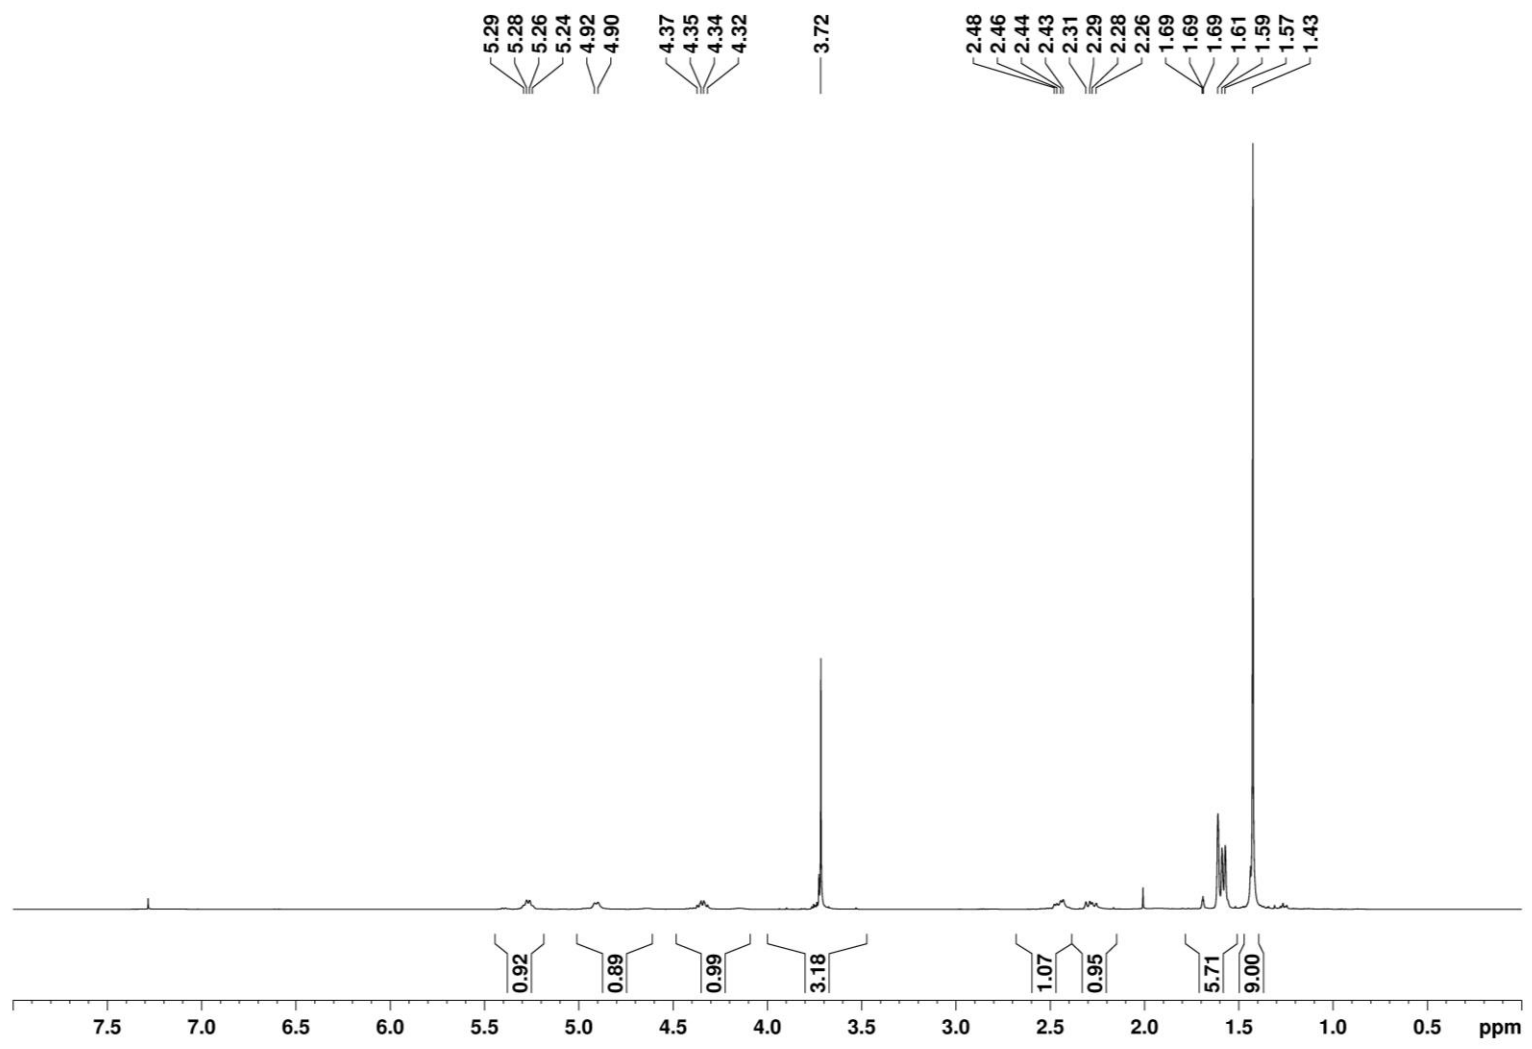

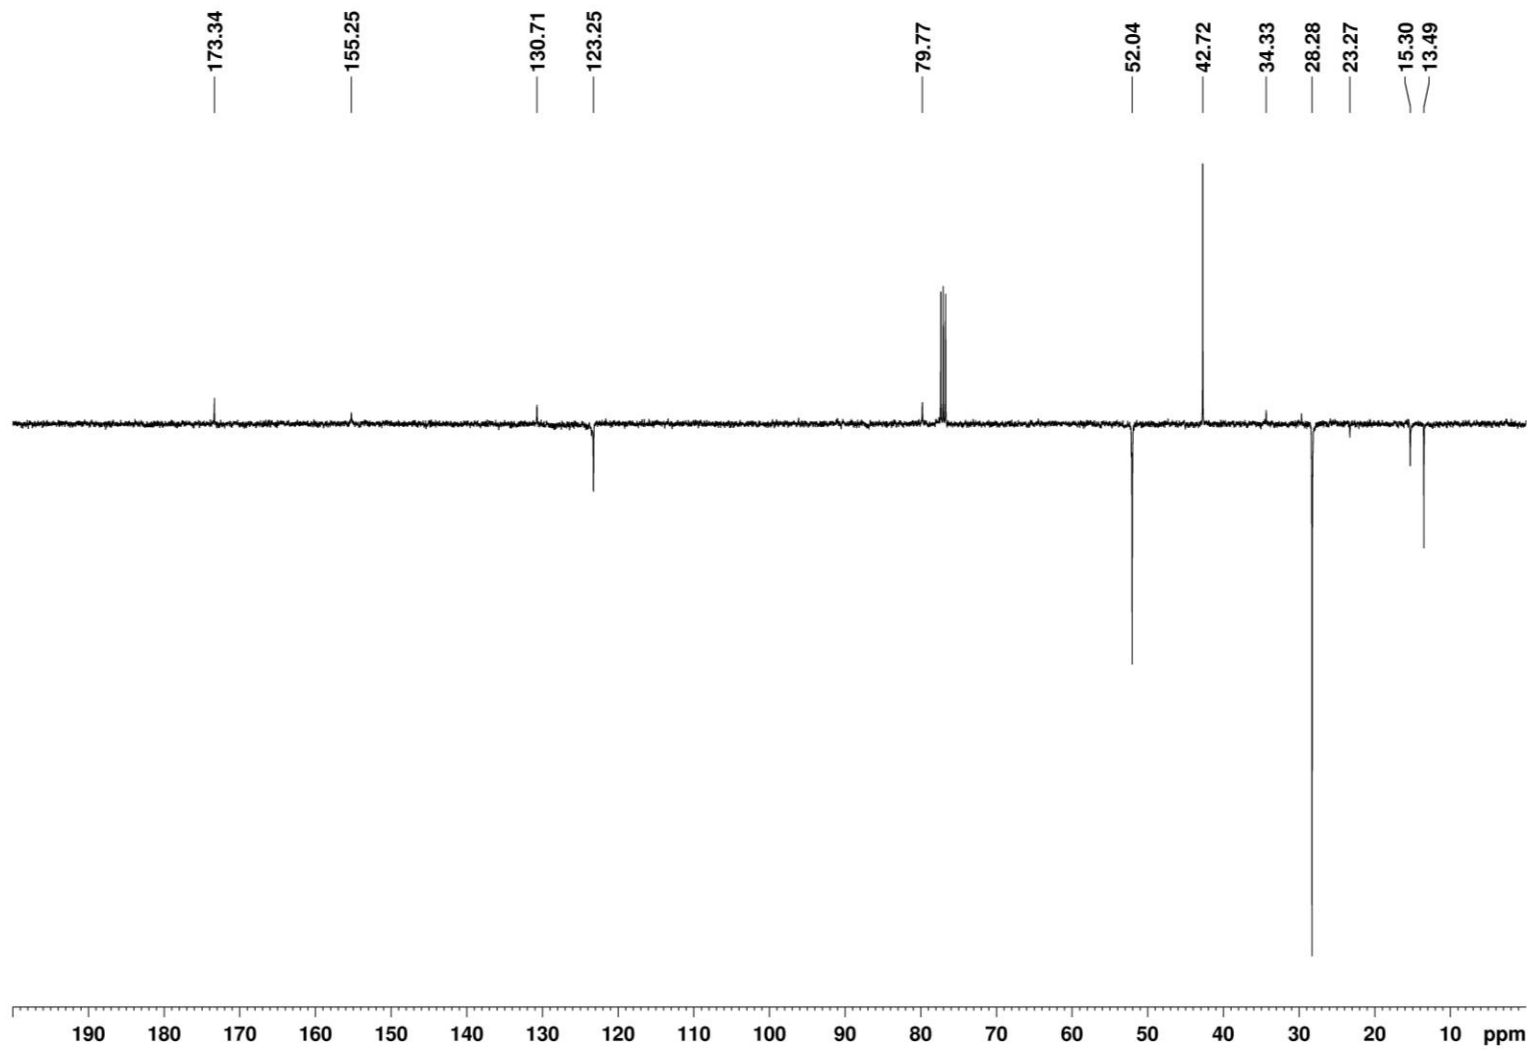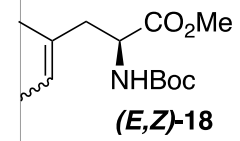

CDCl<sub>3</sub>, 100 MHz



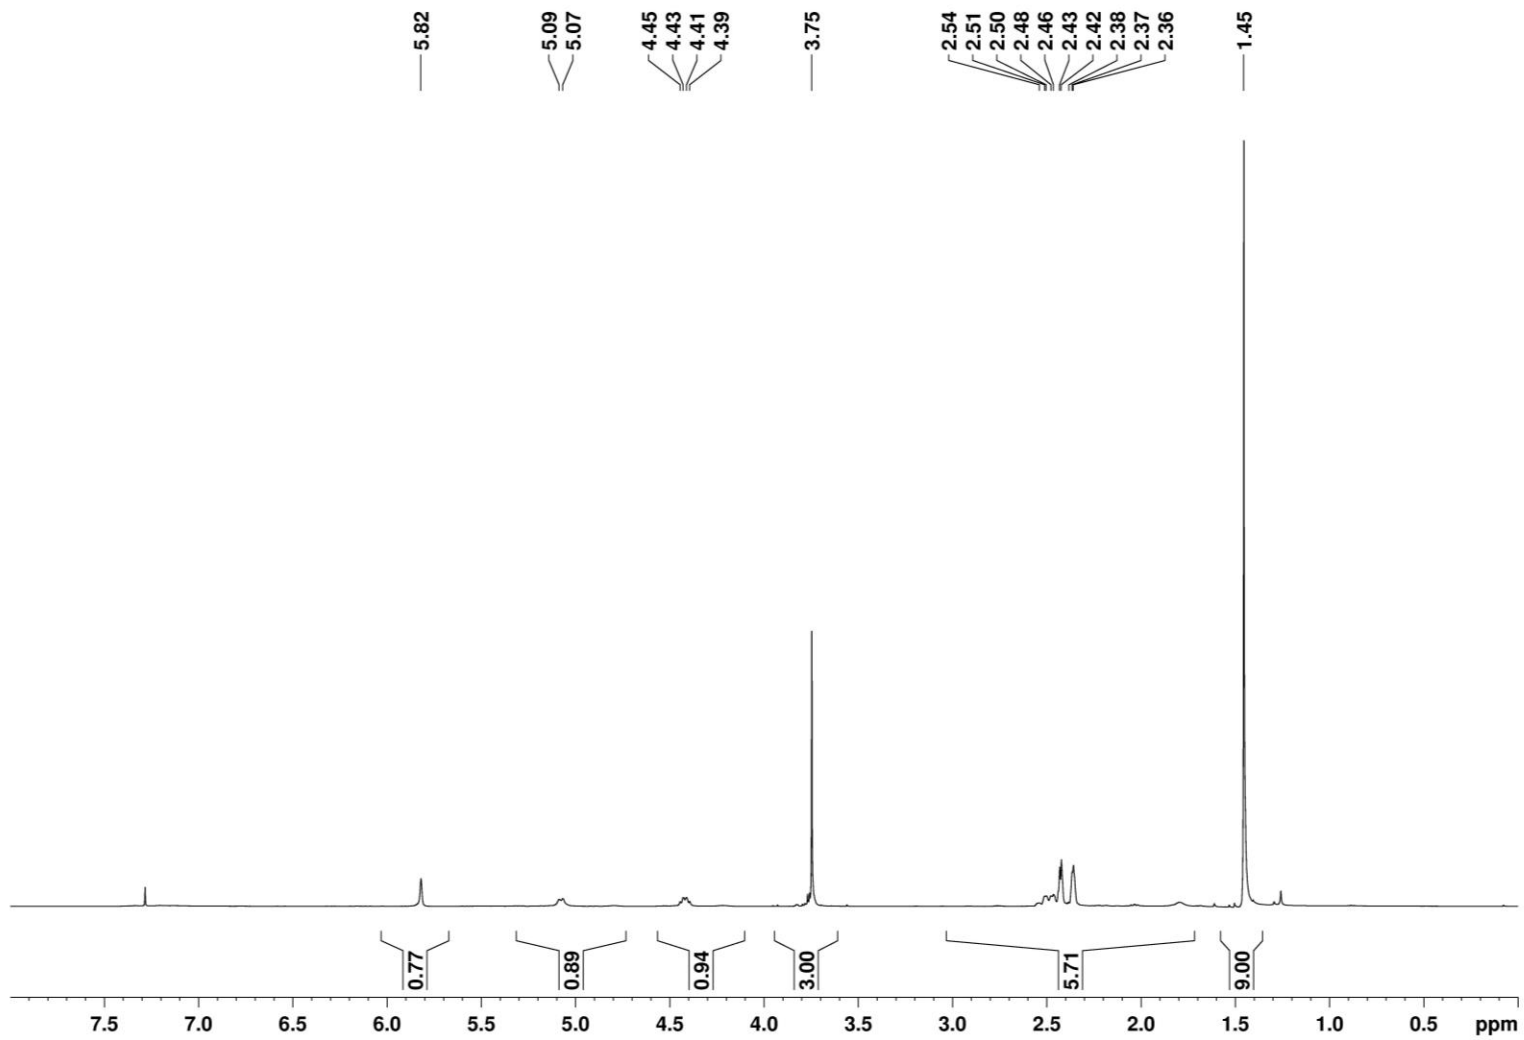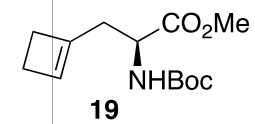

CDCl<sub>3</sub>, 400 MHz

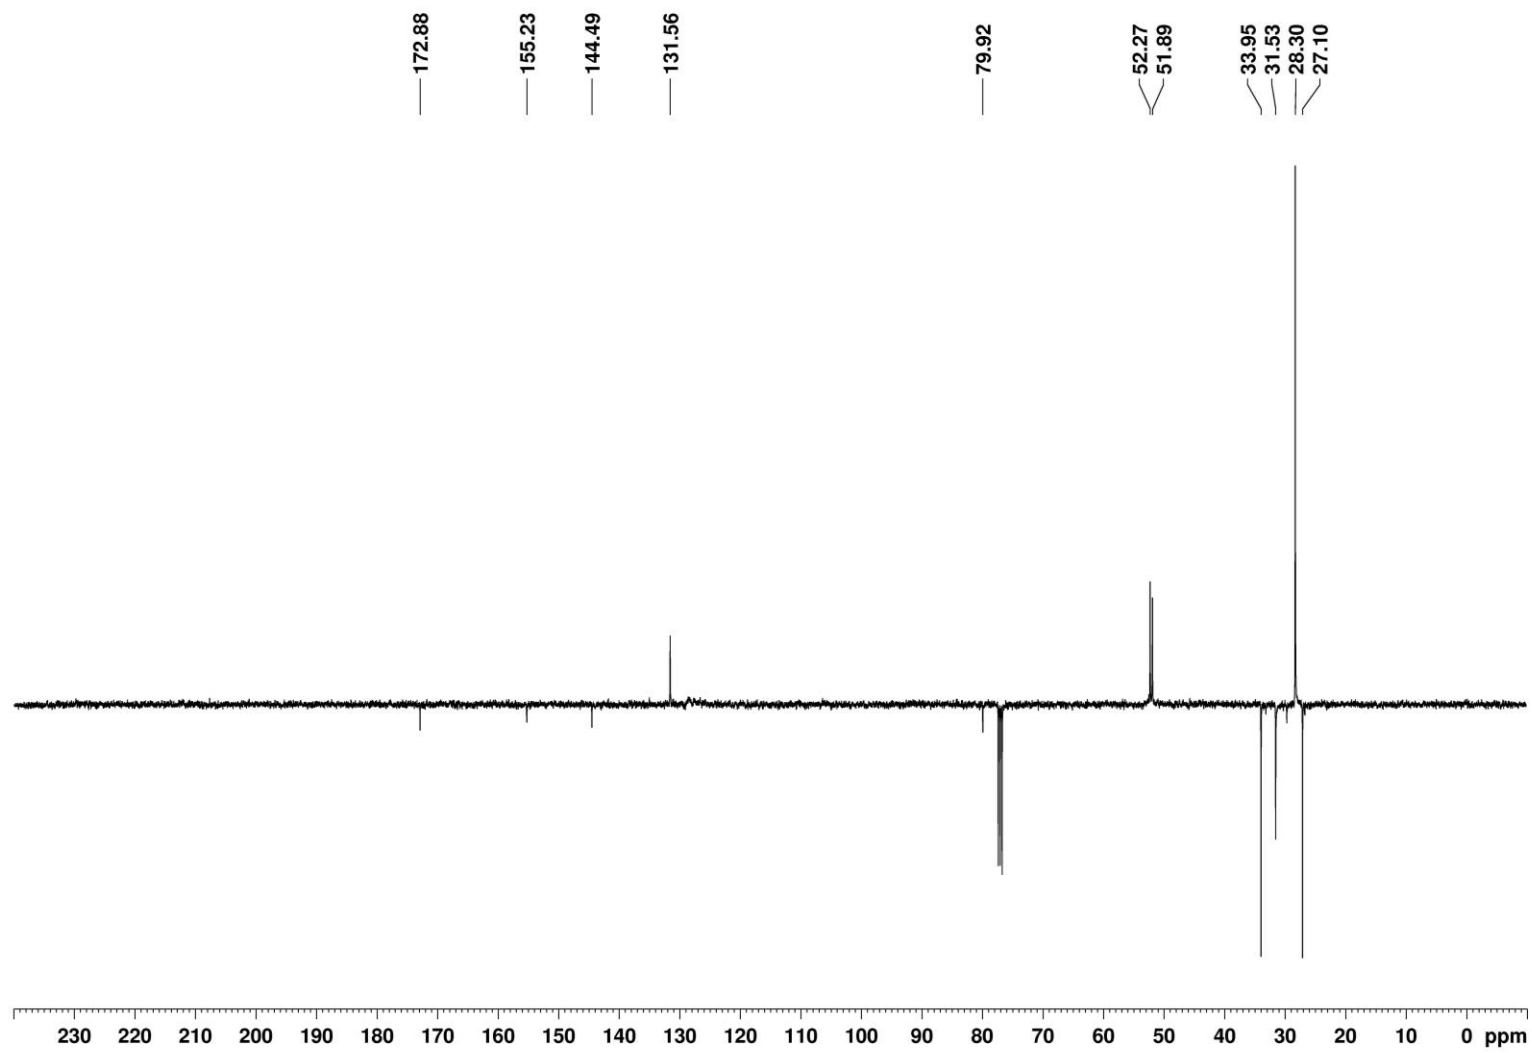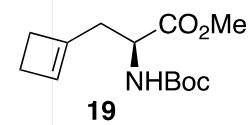

CDCl<sub>3</sub>, 100 MHz

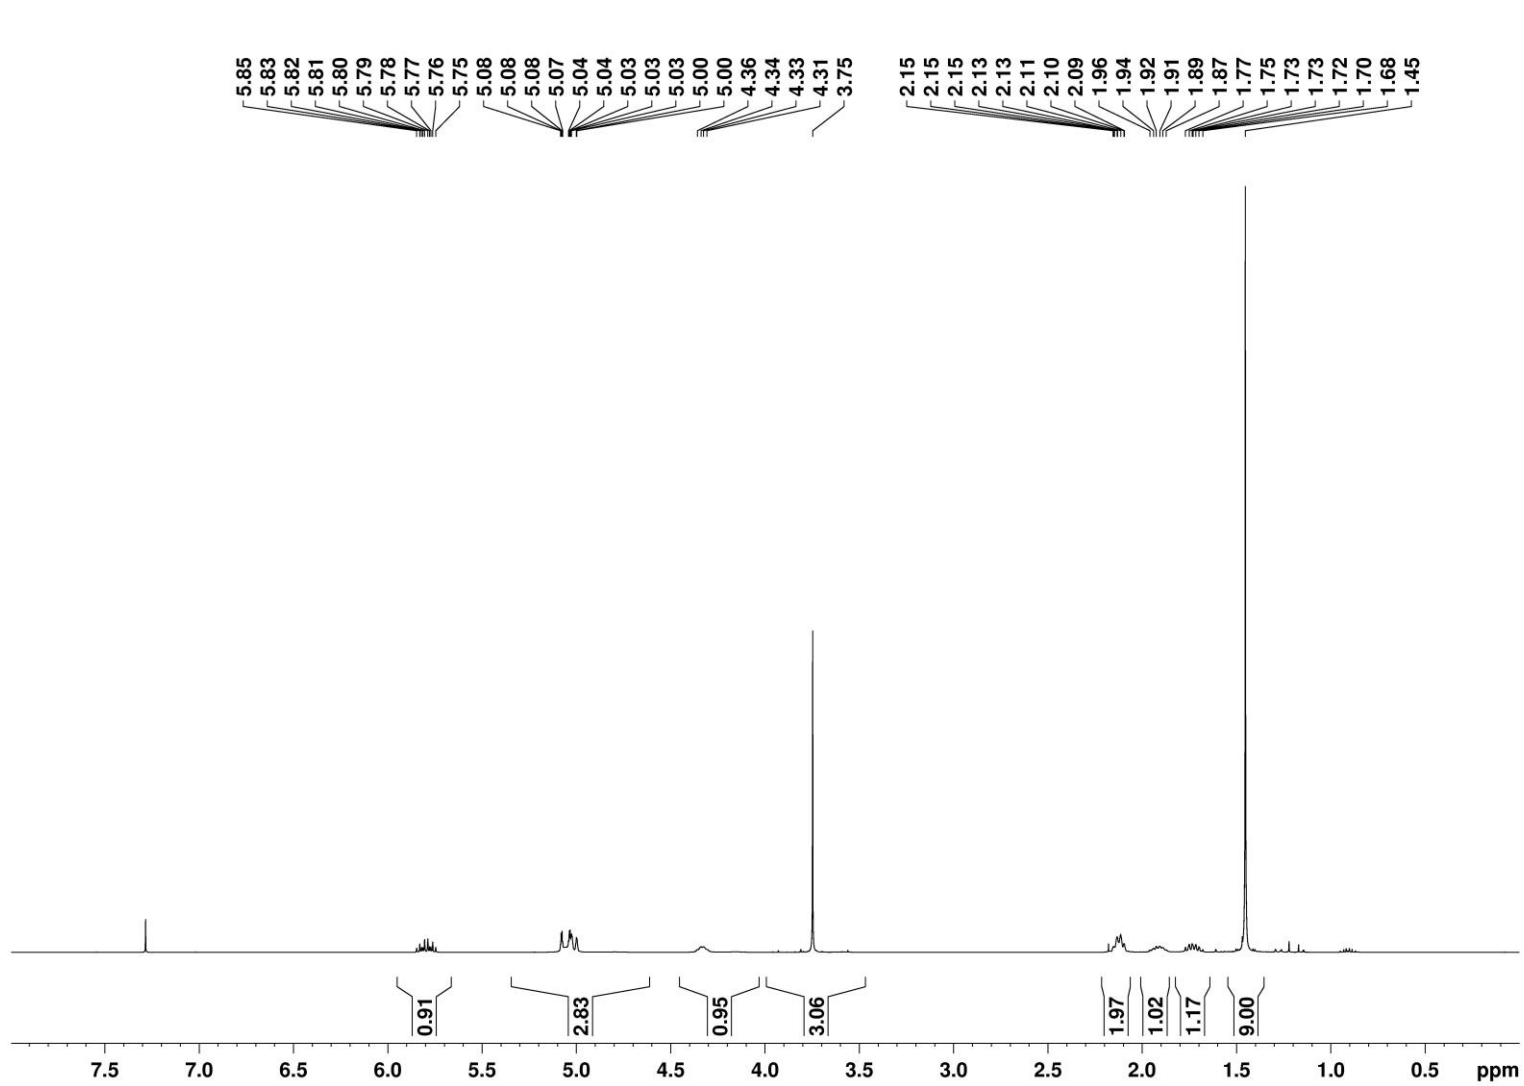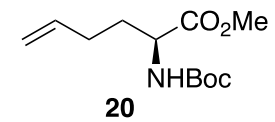

CDCl<sub>3</sub>, 400 MHz

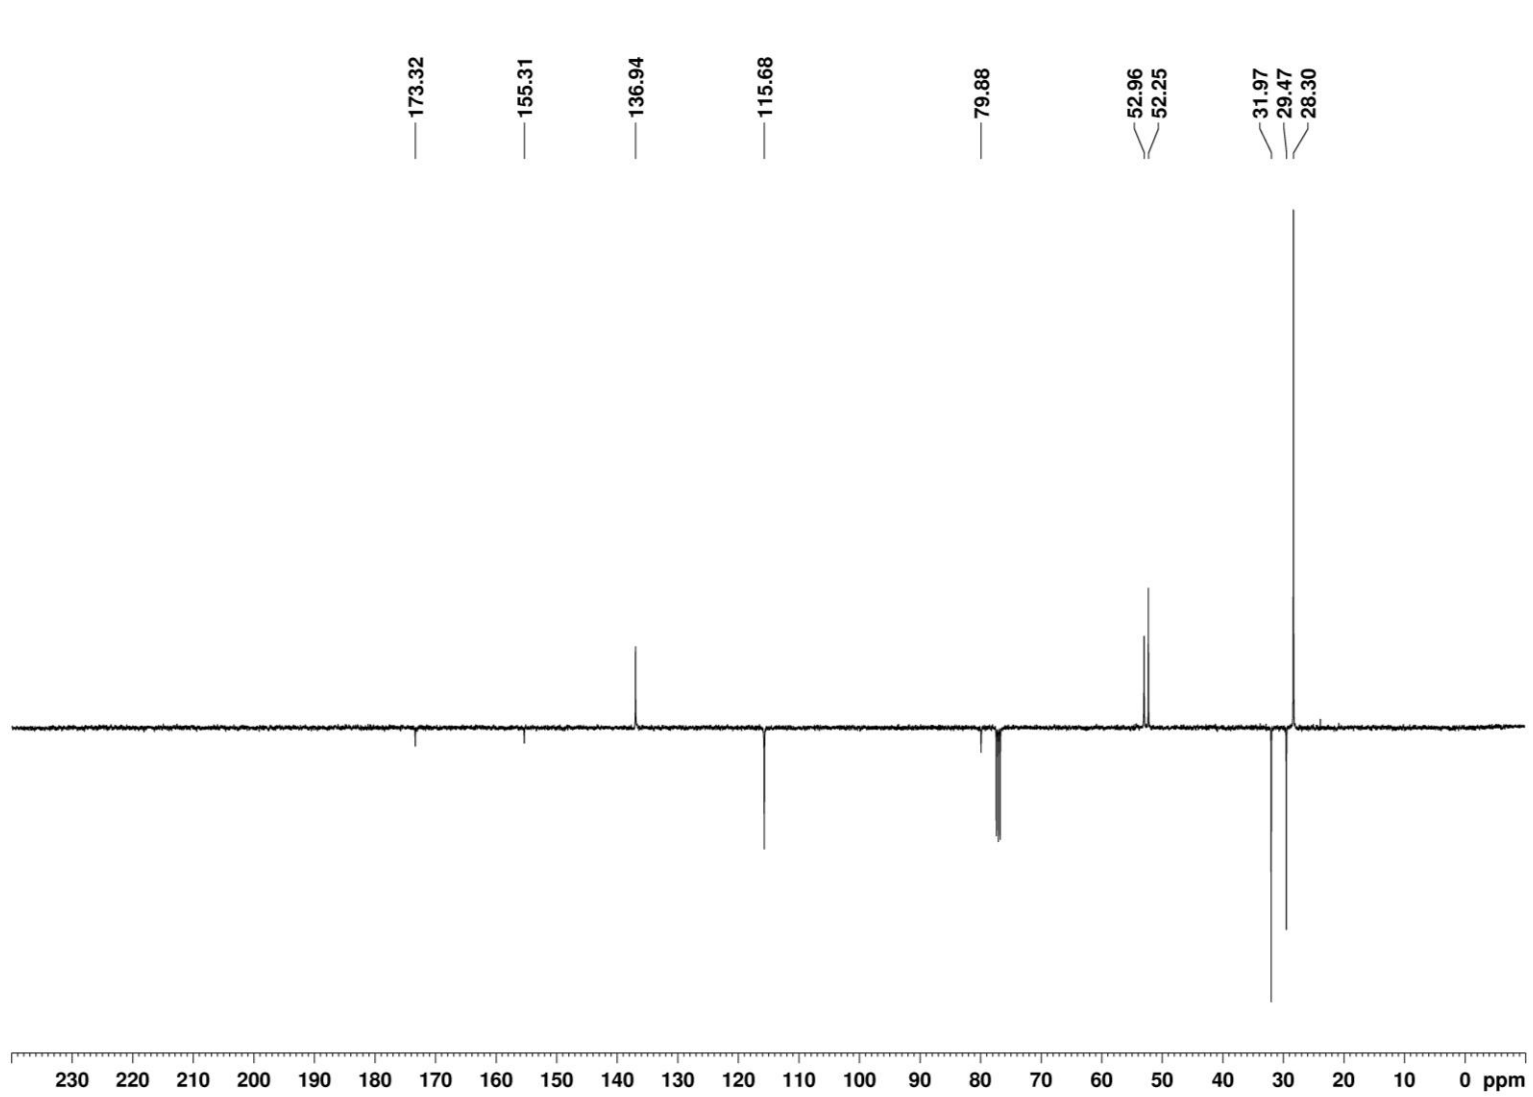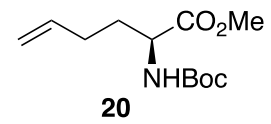

CDCl<sub>3</sub>, 100 MHz

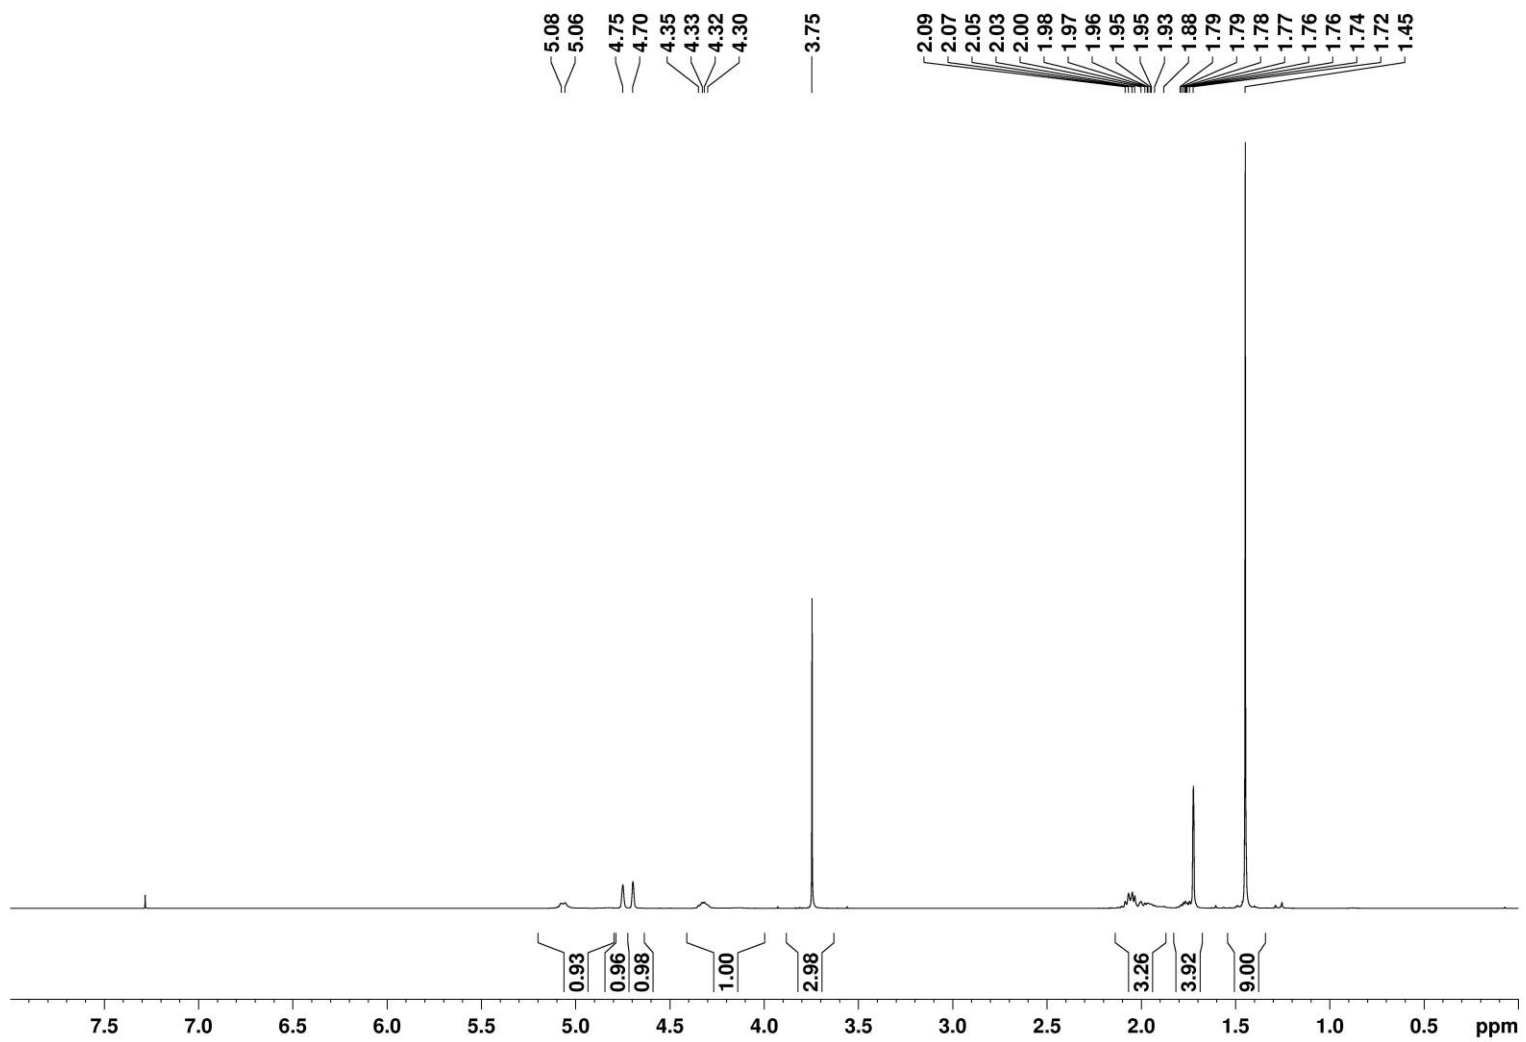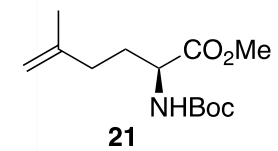

CDCl<sub>3</sub>, 400 MHz

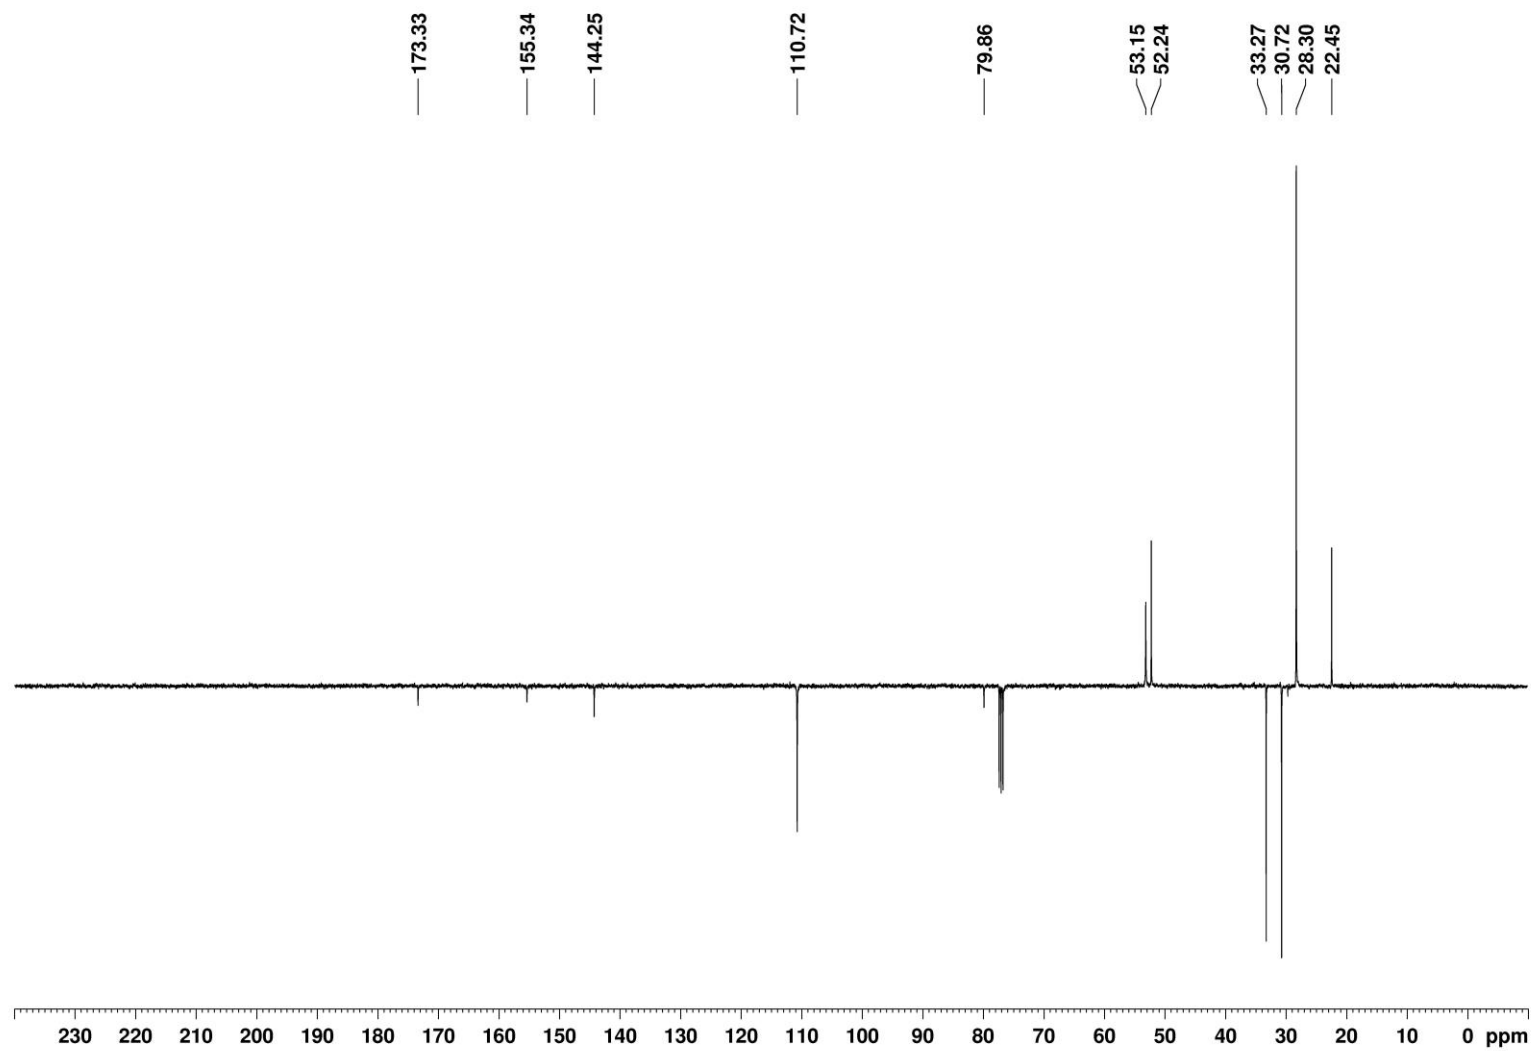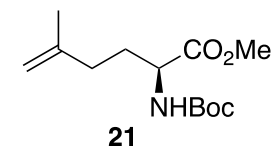

CDCl<sub>3</sub>, 100 MHz

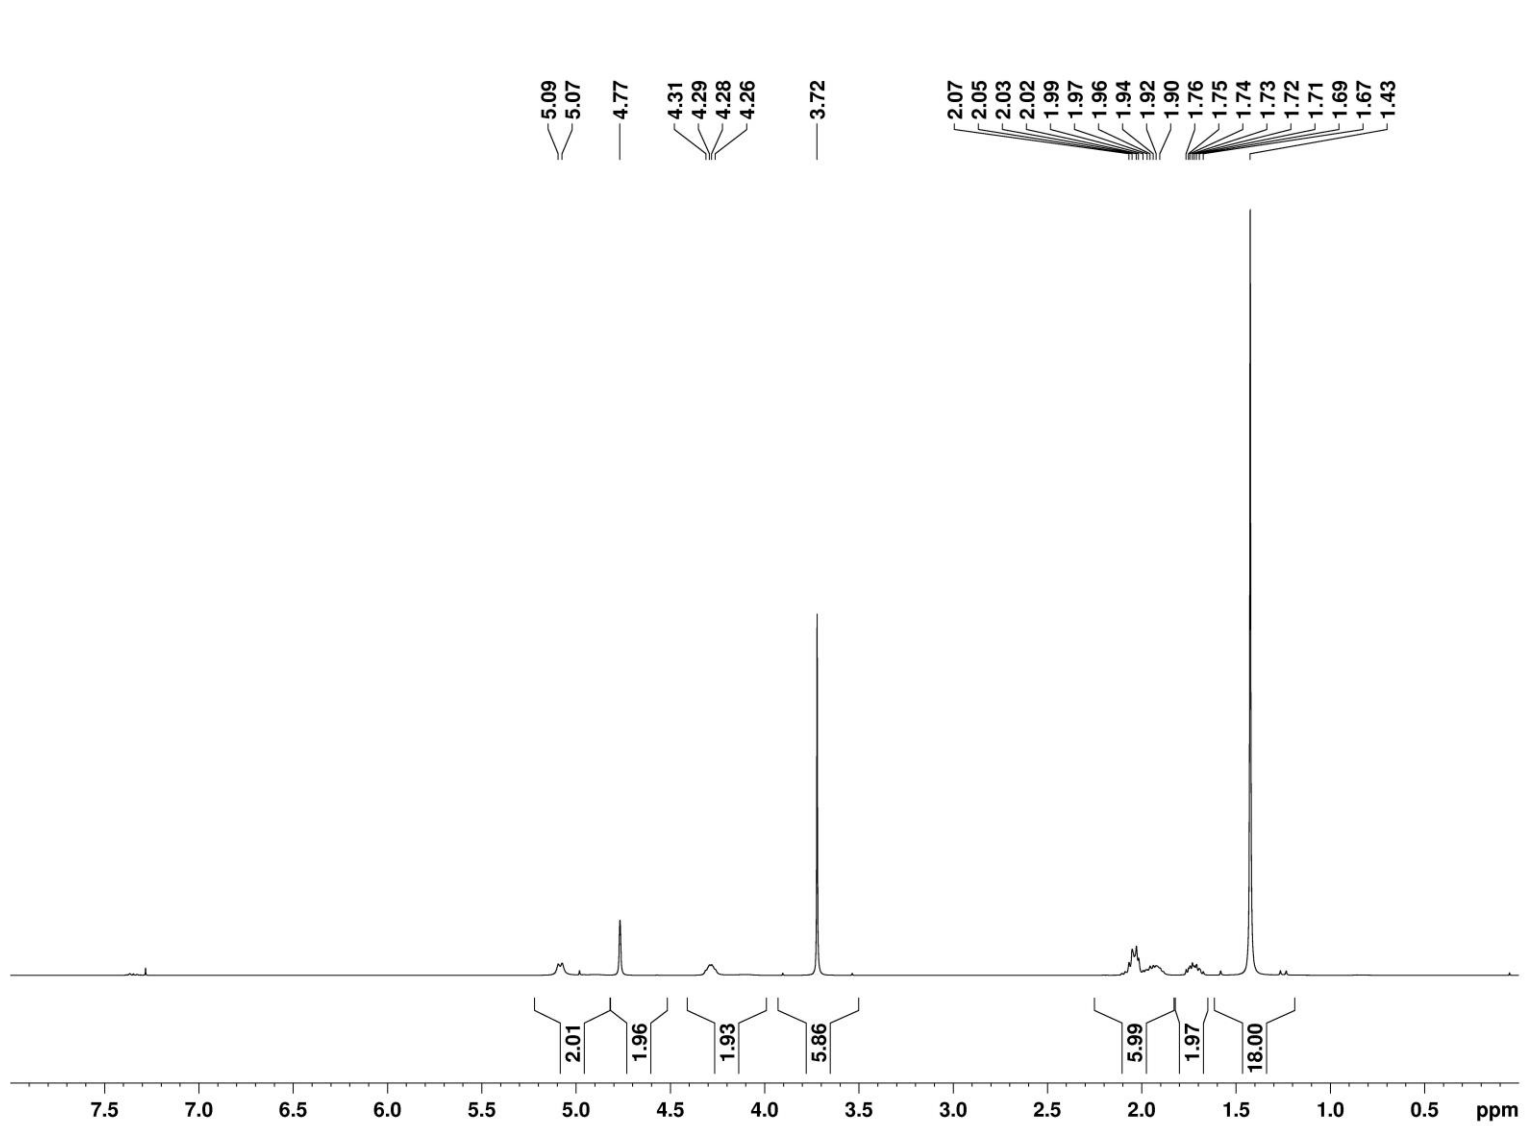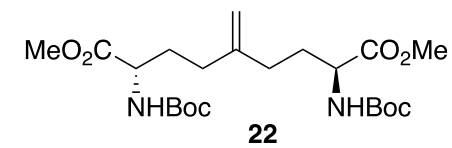

CDCl<sub>3</sub>, 400 MHz

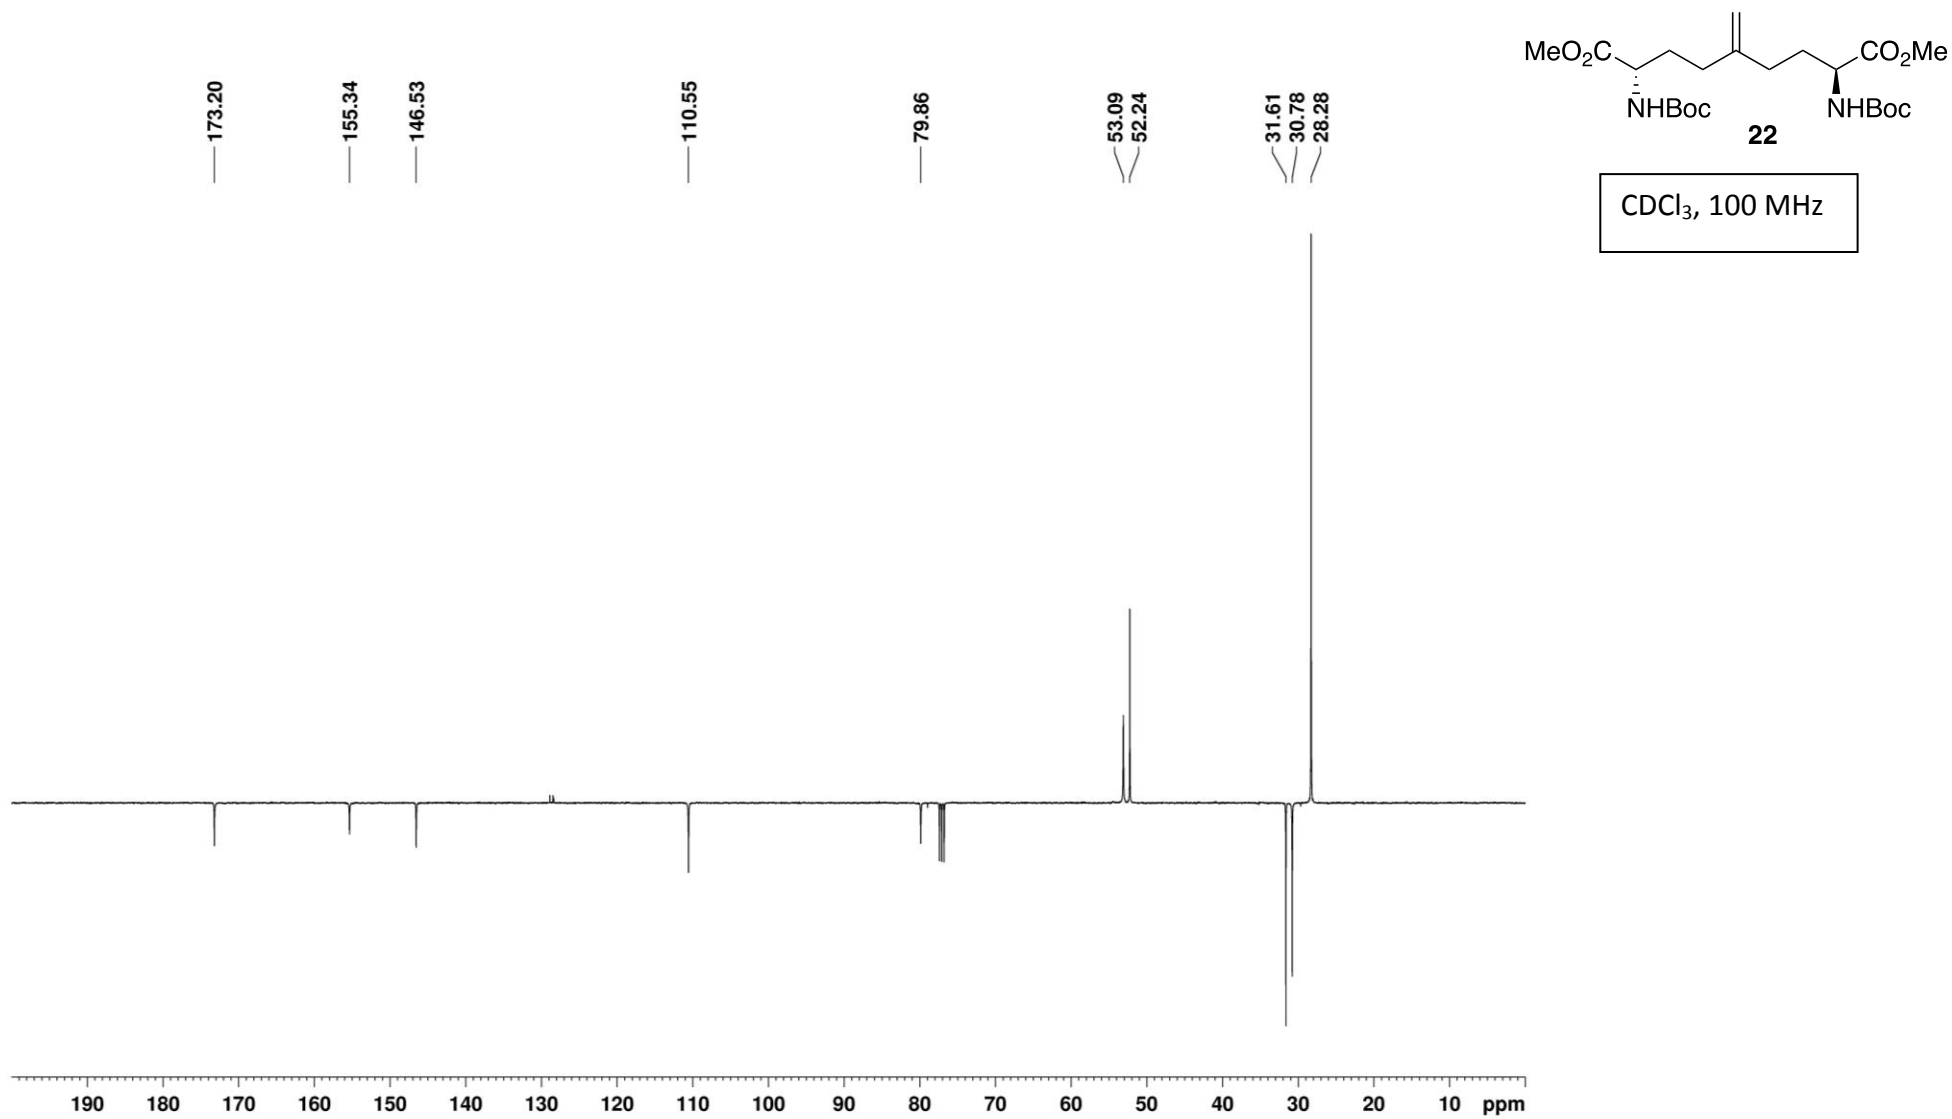



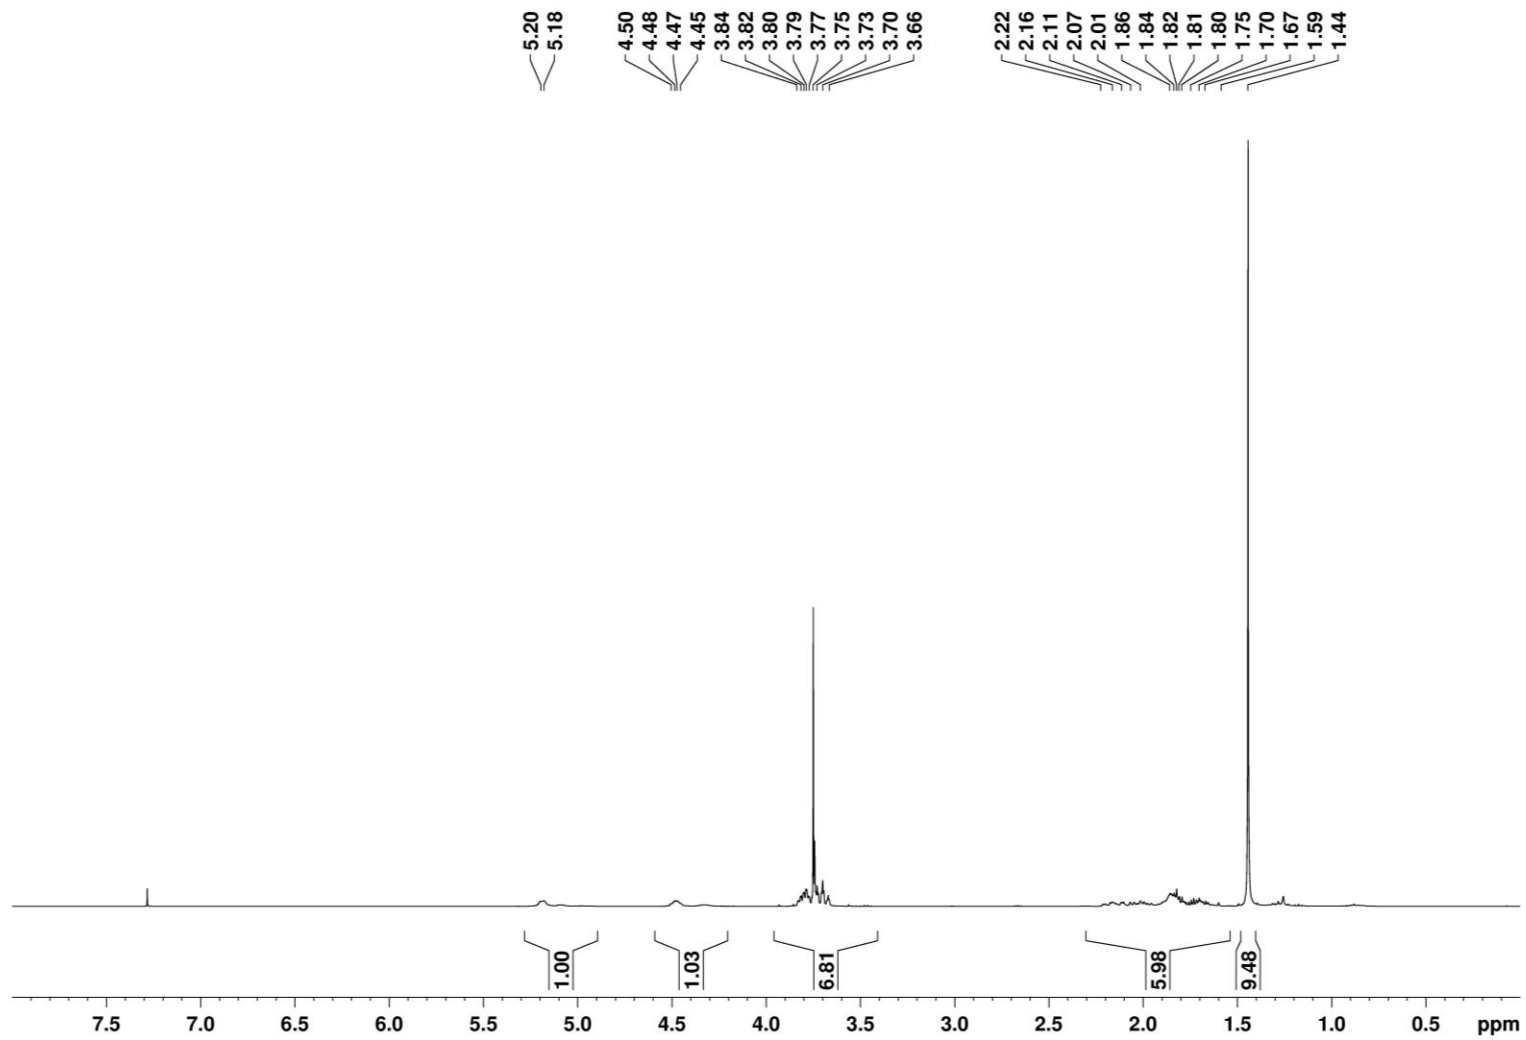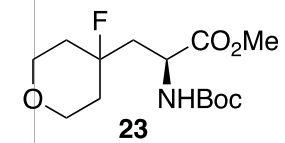

CDCl<sub>3</sub>, 400 MHz

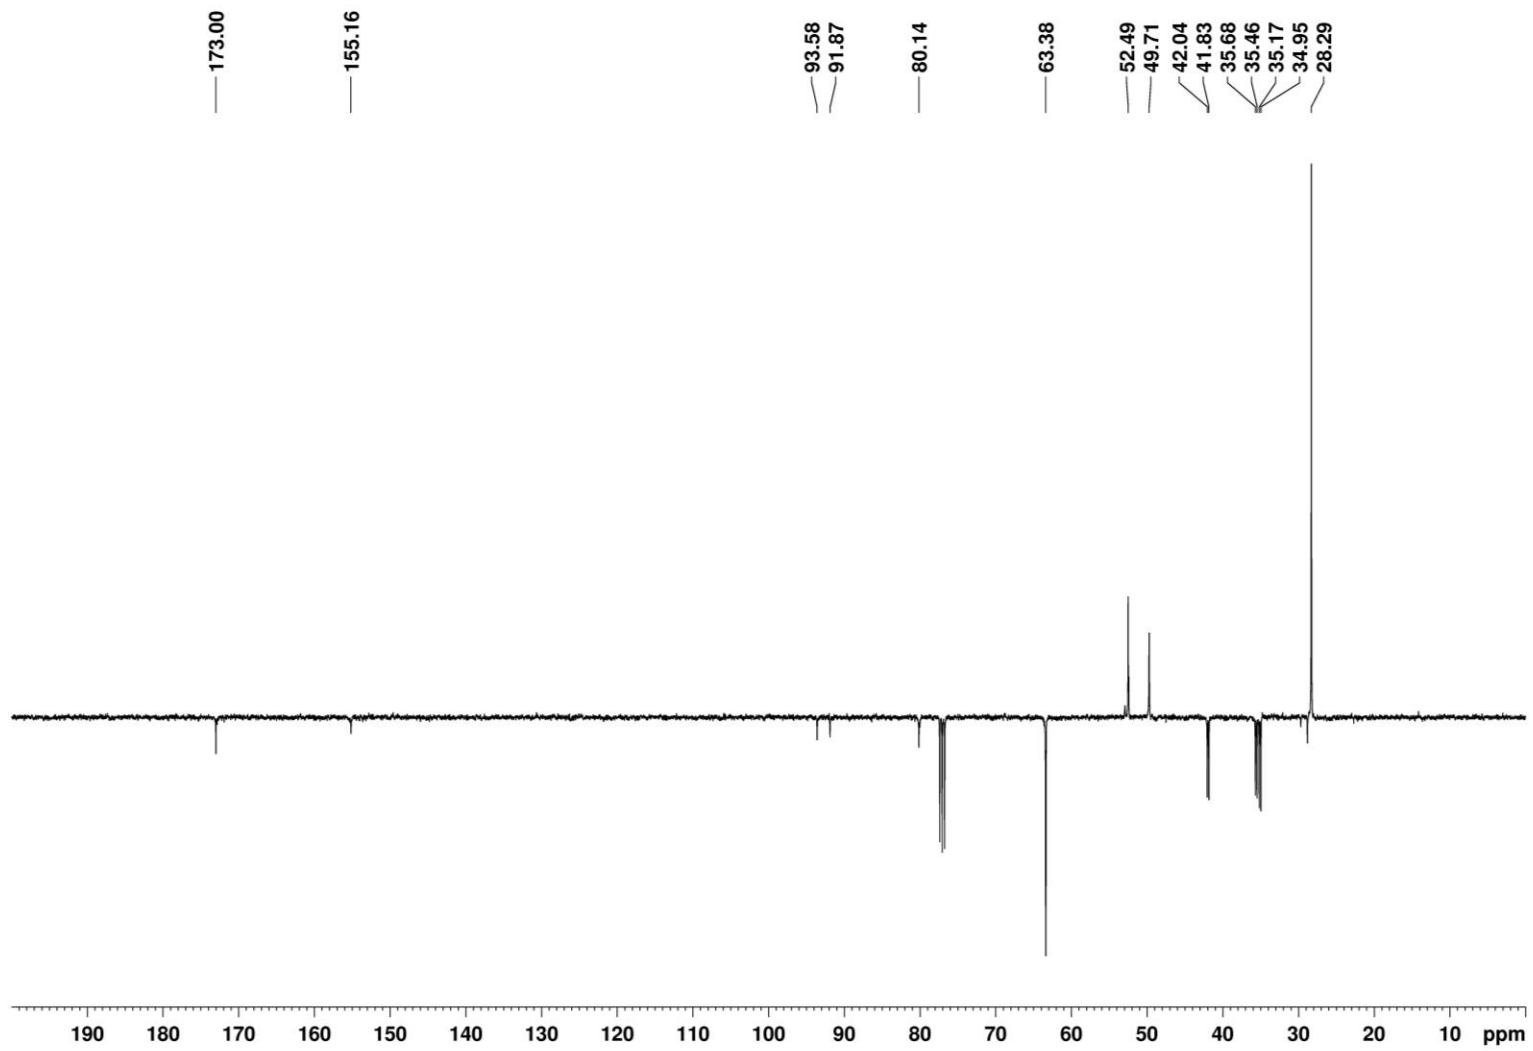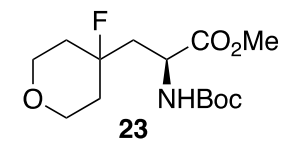

CDCl<sub>3</sub>, 100 MHz

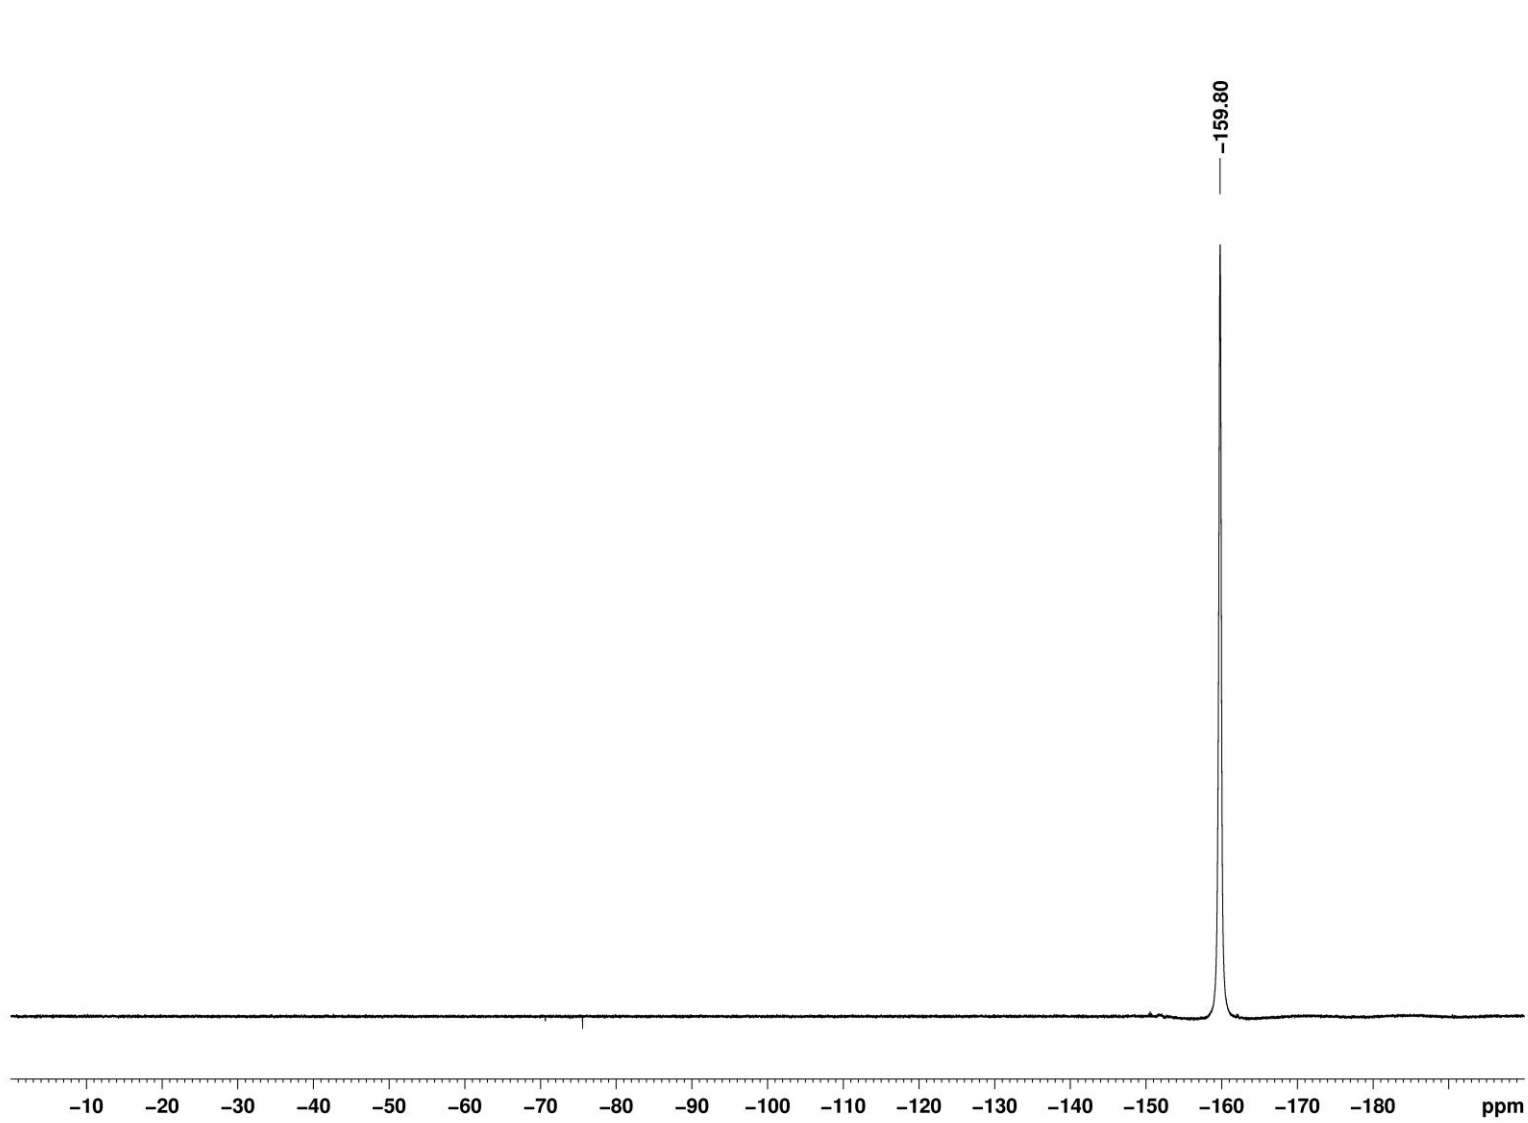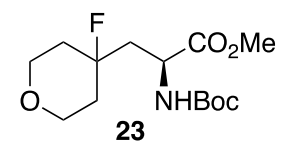

CDCl<sub>3</sub>, 377 MHz

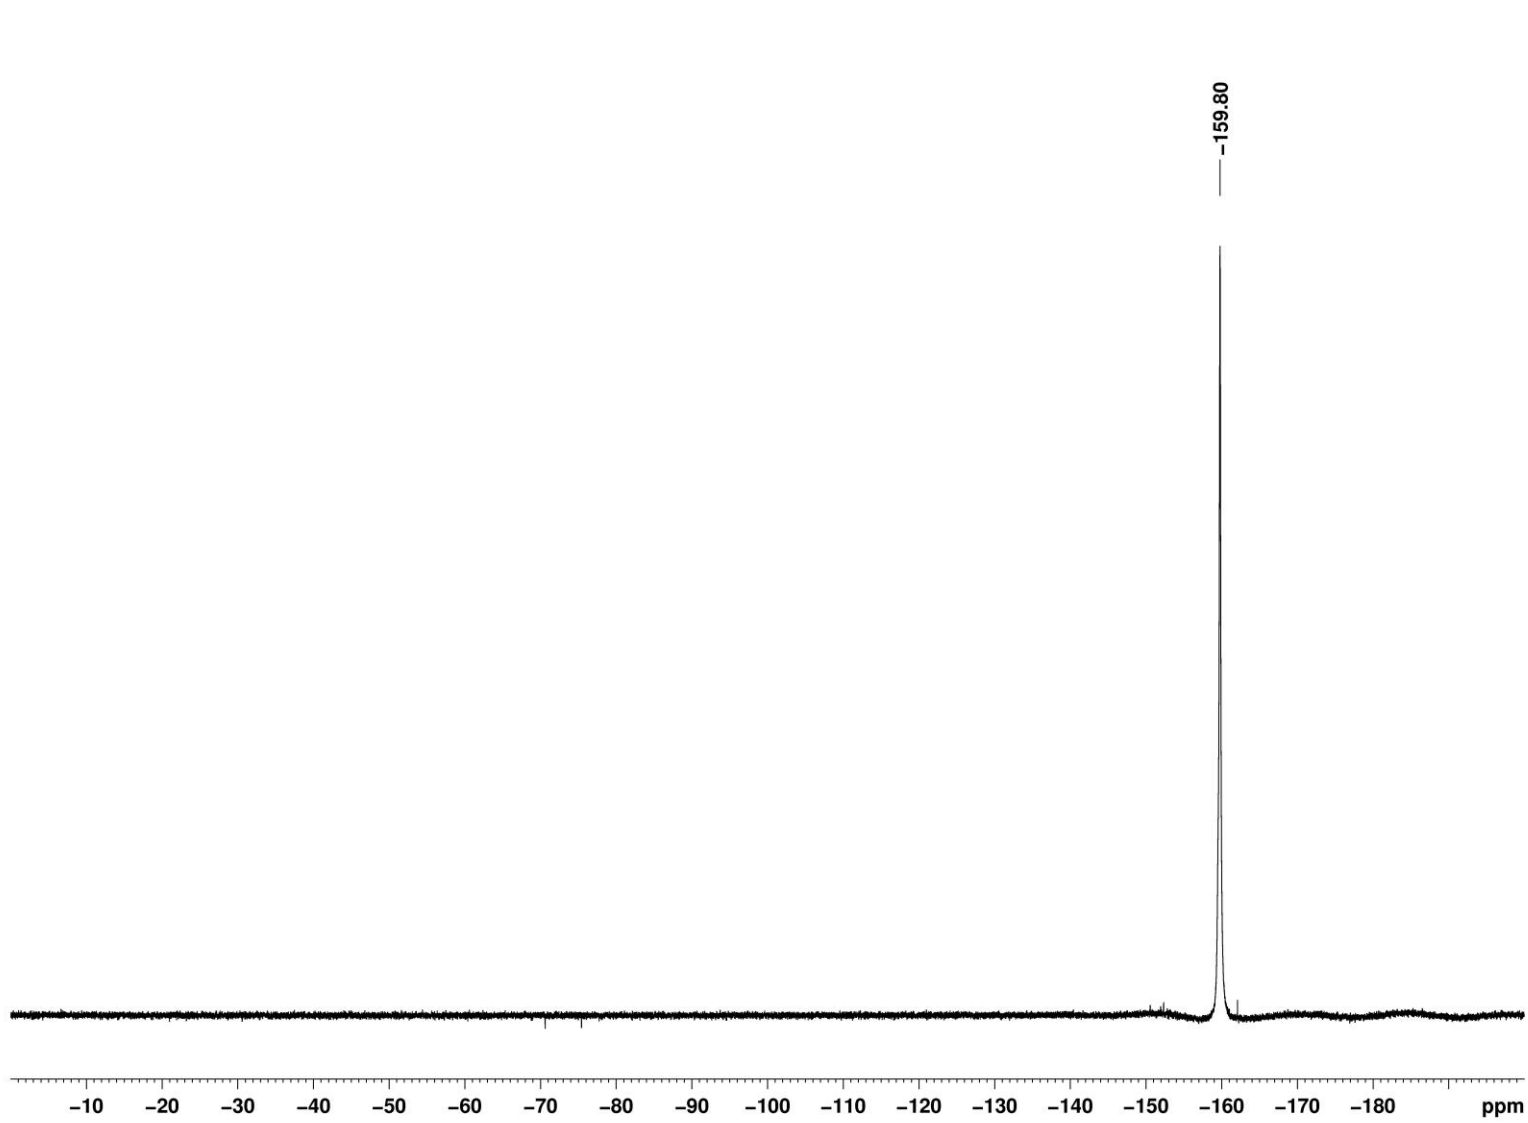

CDCl<sub>3</sub>, {<sup>1</sup>H} 377 MHz

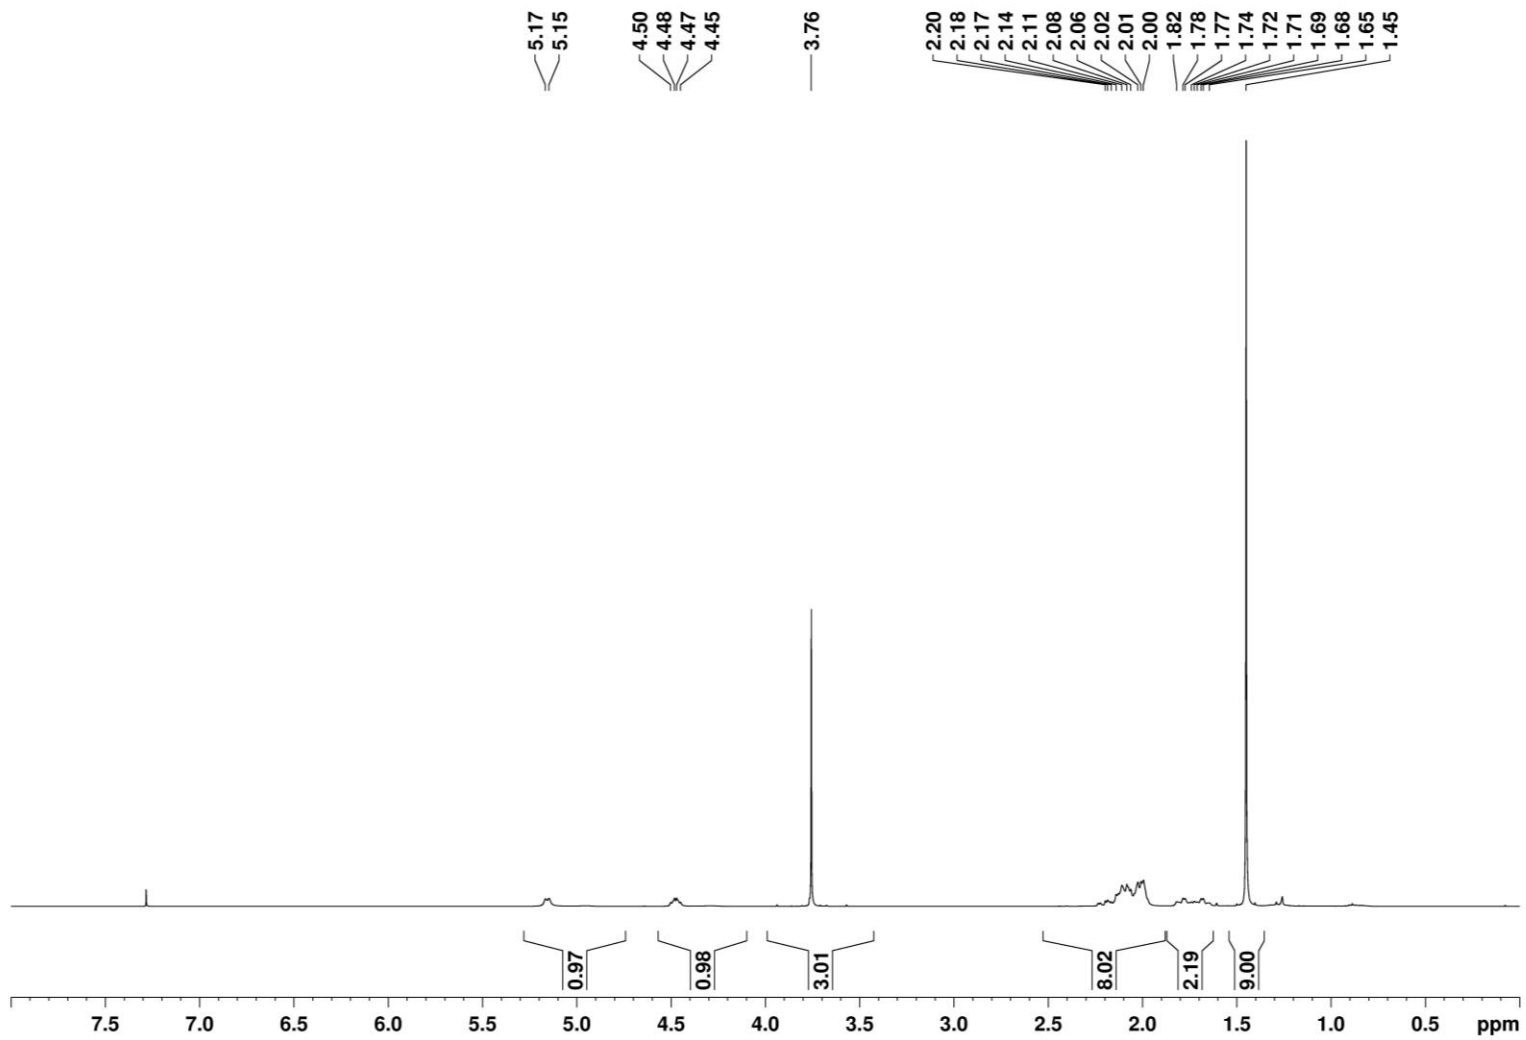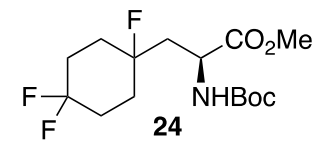

CDCl<sub>3</sub>, 400 MHz

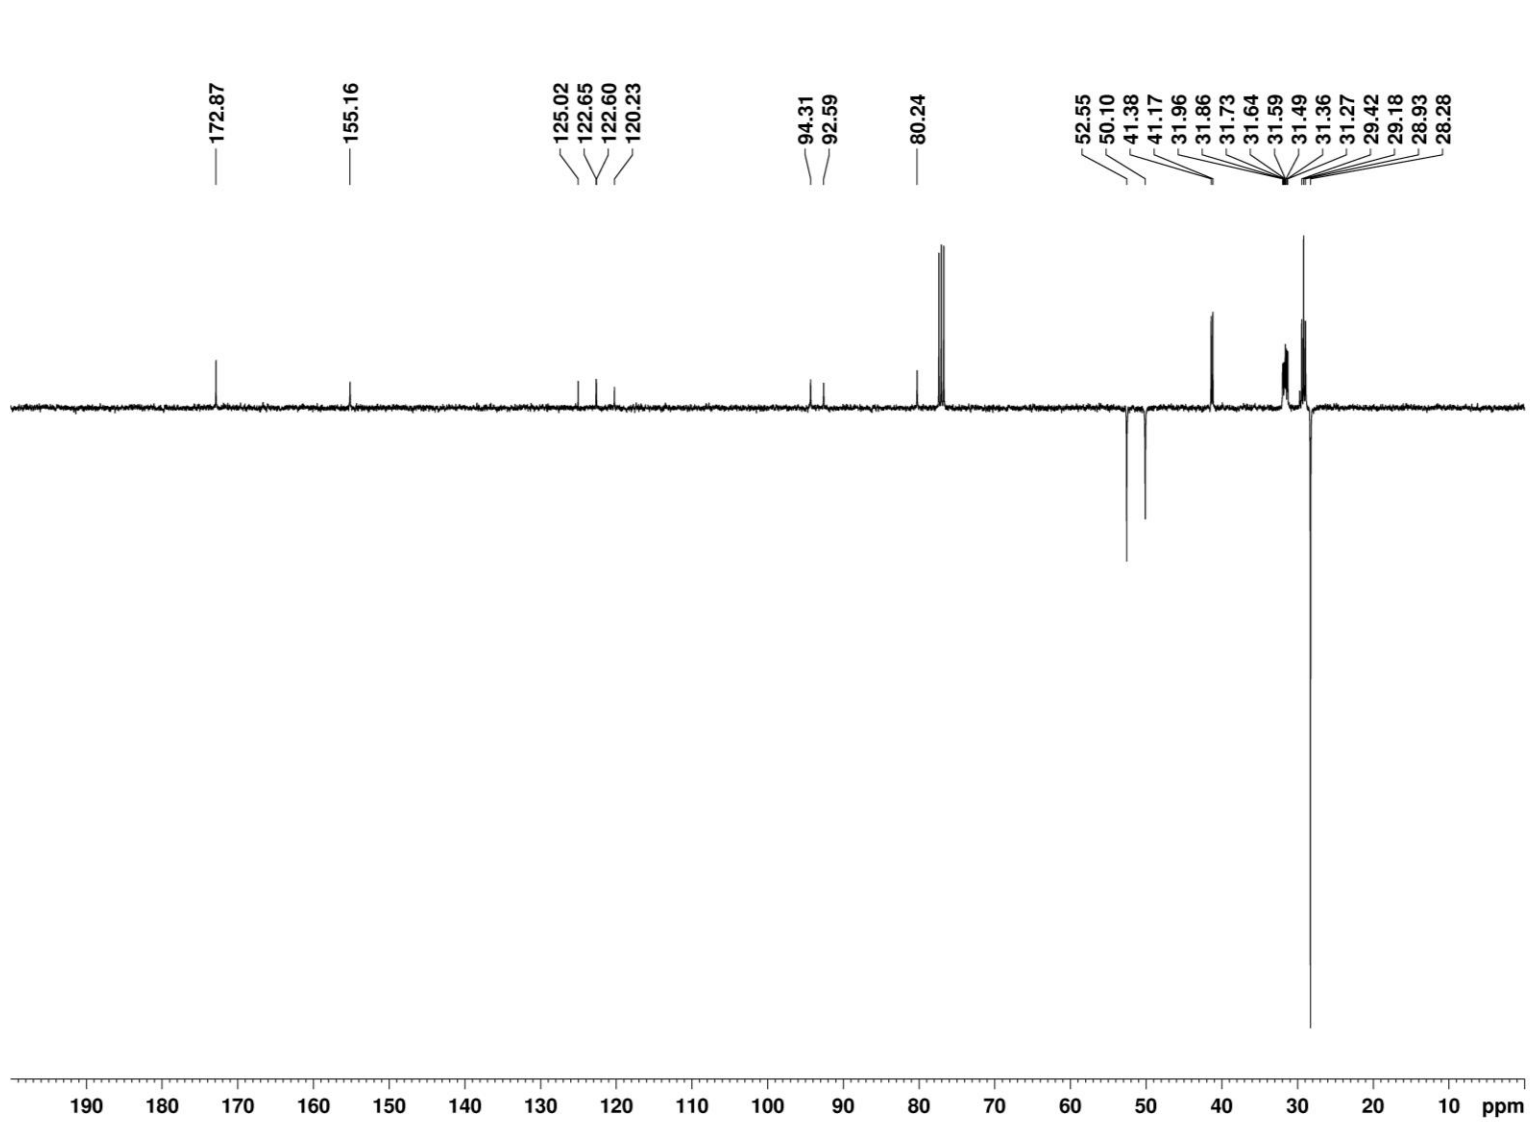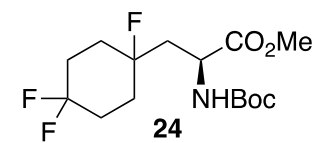

CDCl<sub>3</sub>, 100 MHz

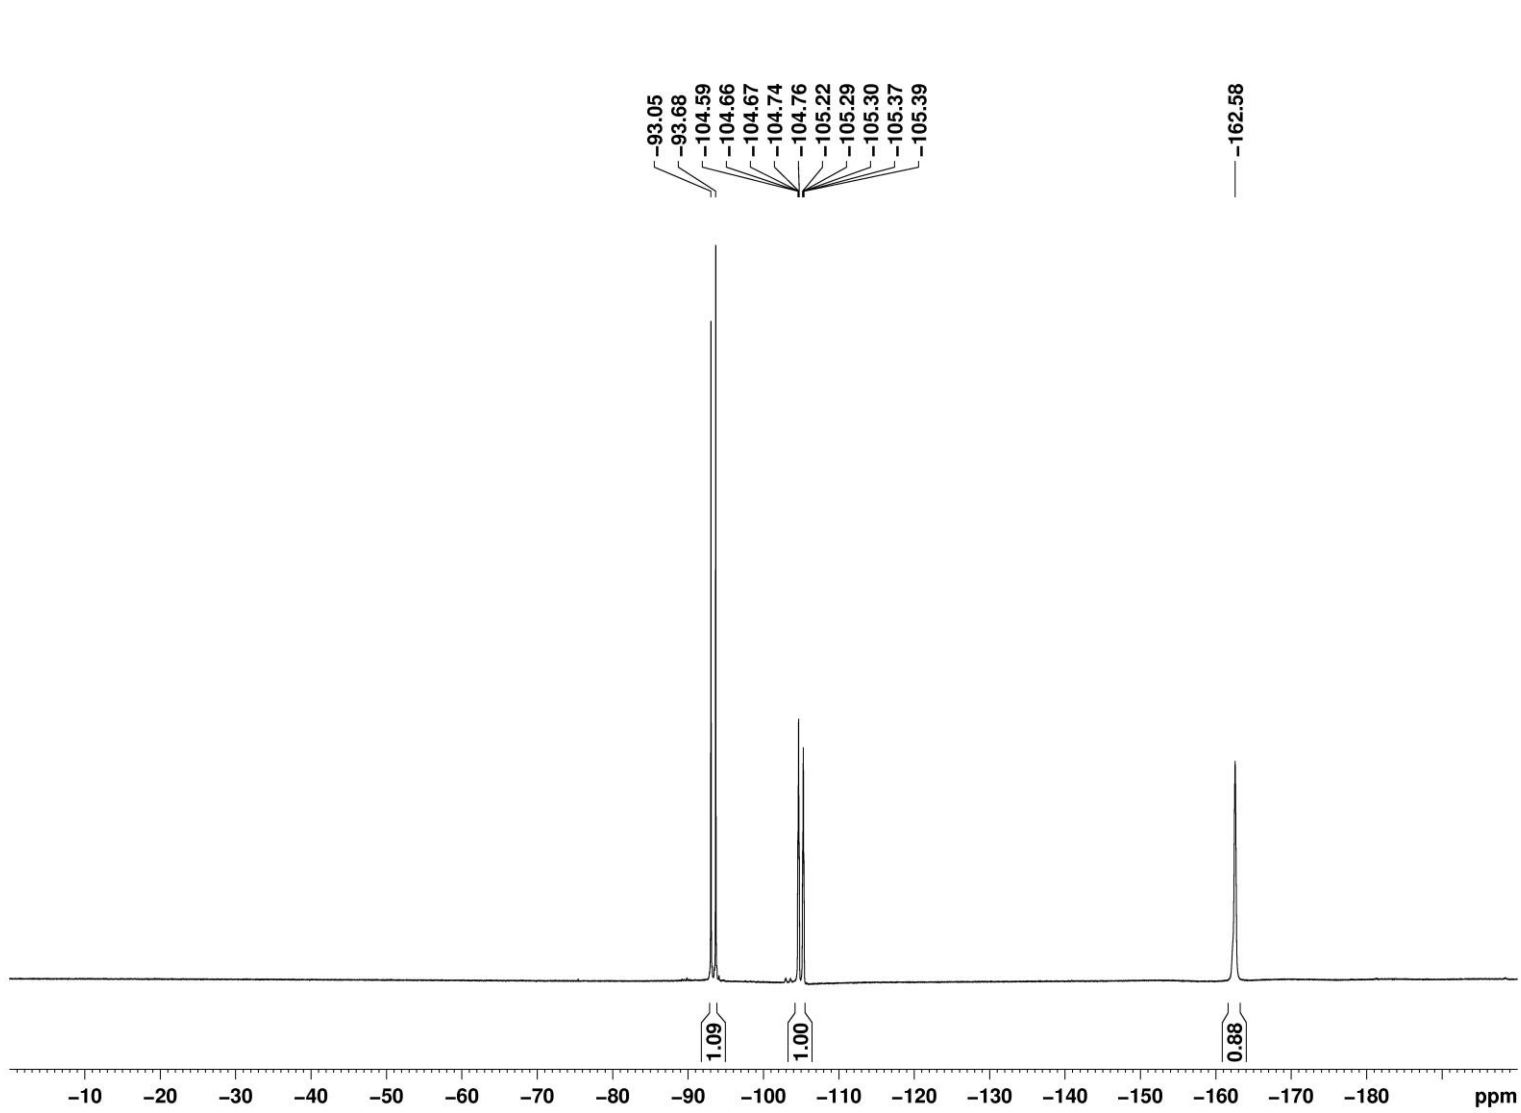

CDCl<sub>3</sub>, 377 MHz

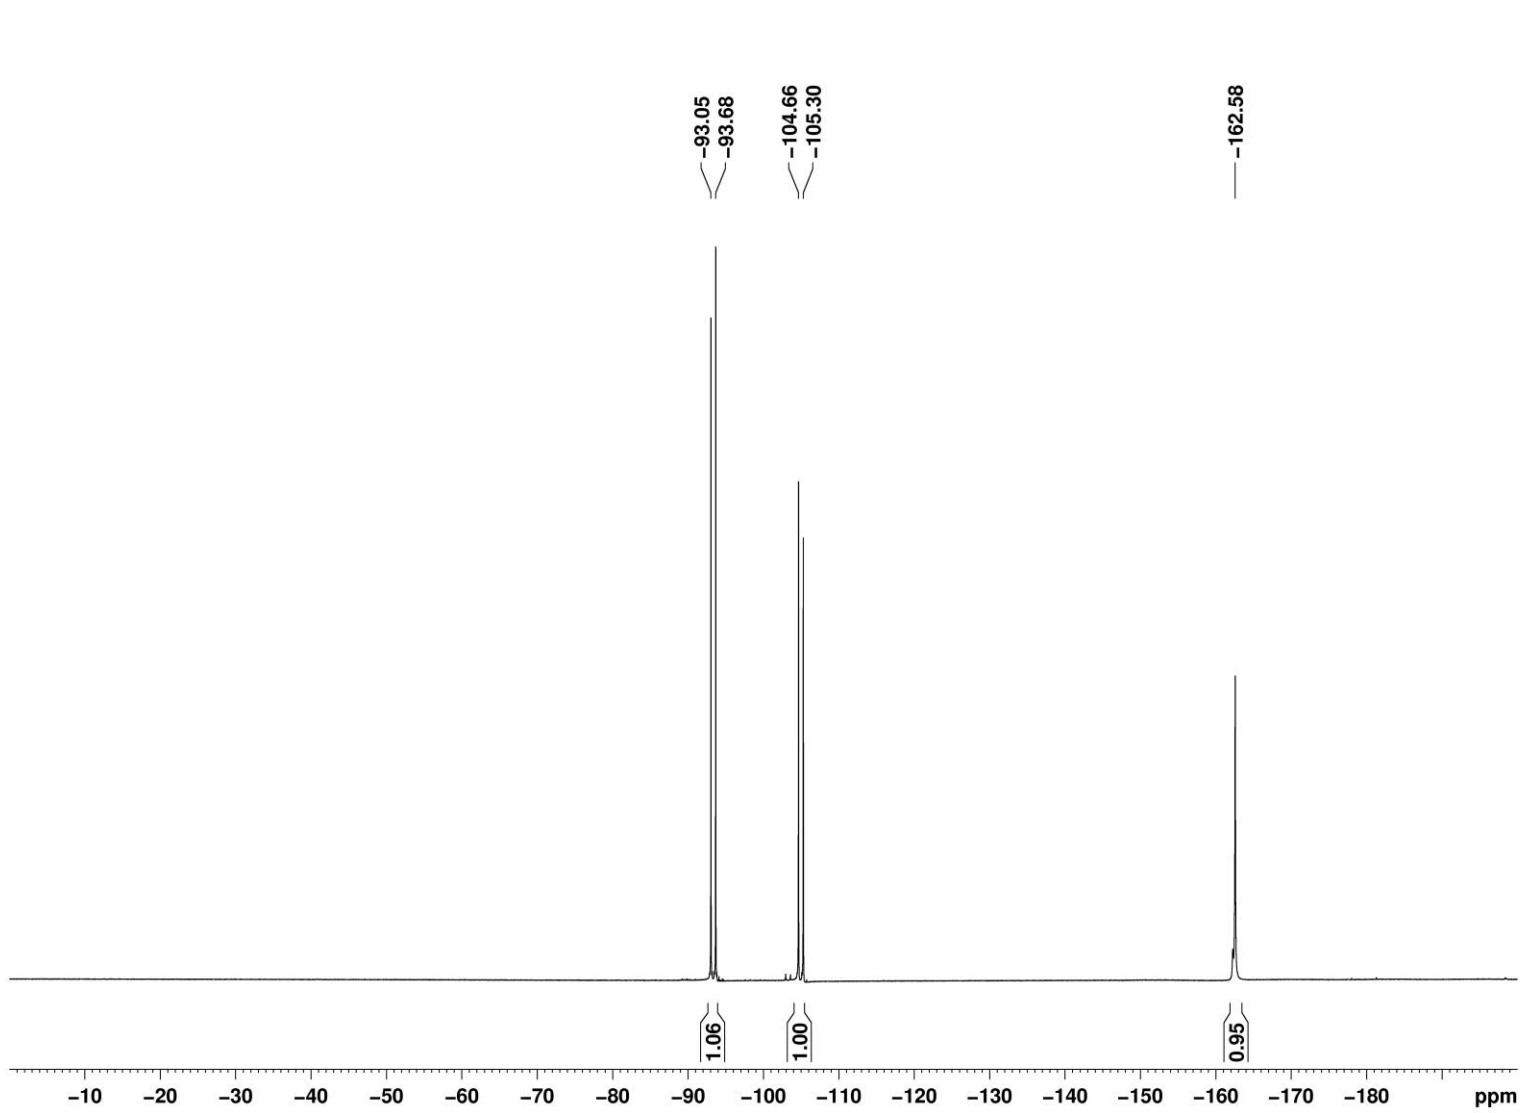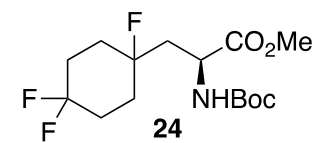

CDCl<sub>3</sub>, {<sup>1</sup>H} 377 MHz



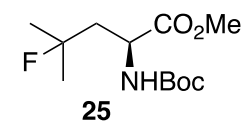

CDCl<sub>3</sub>, 400 MHz

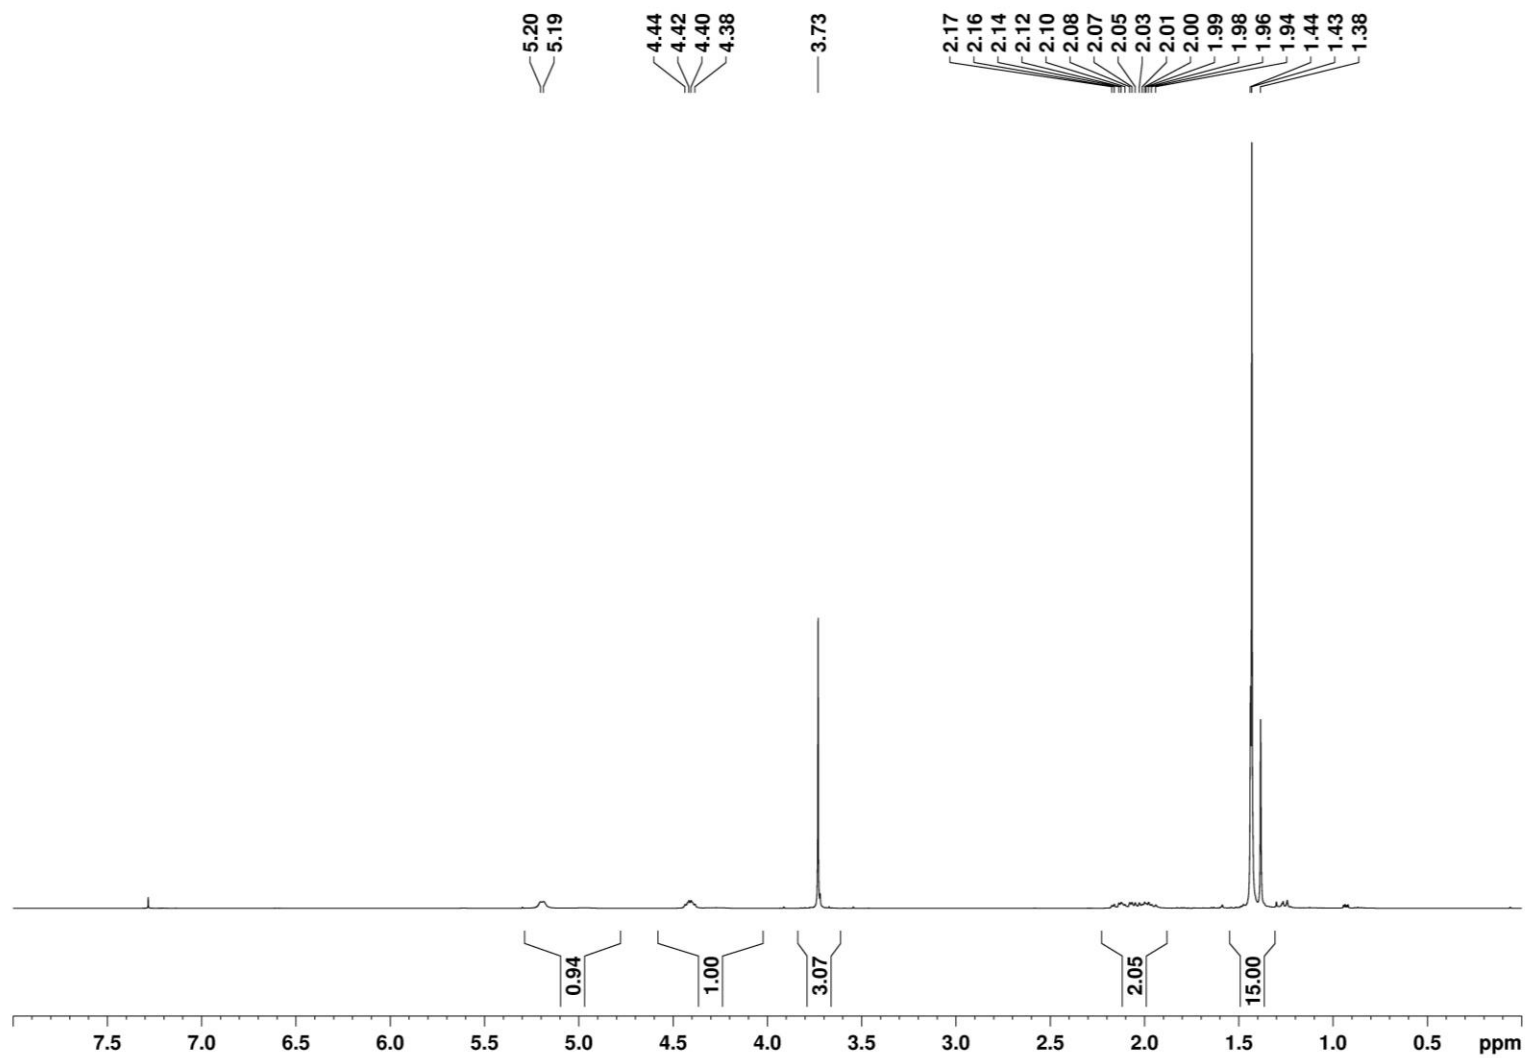

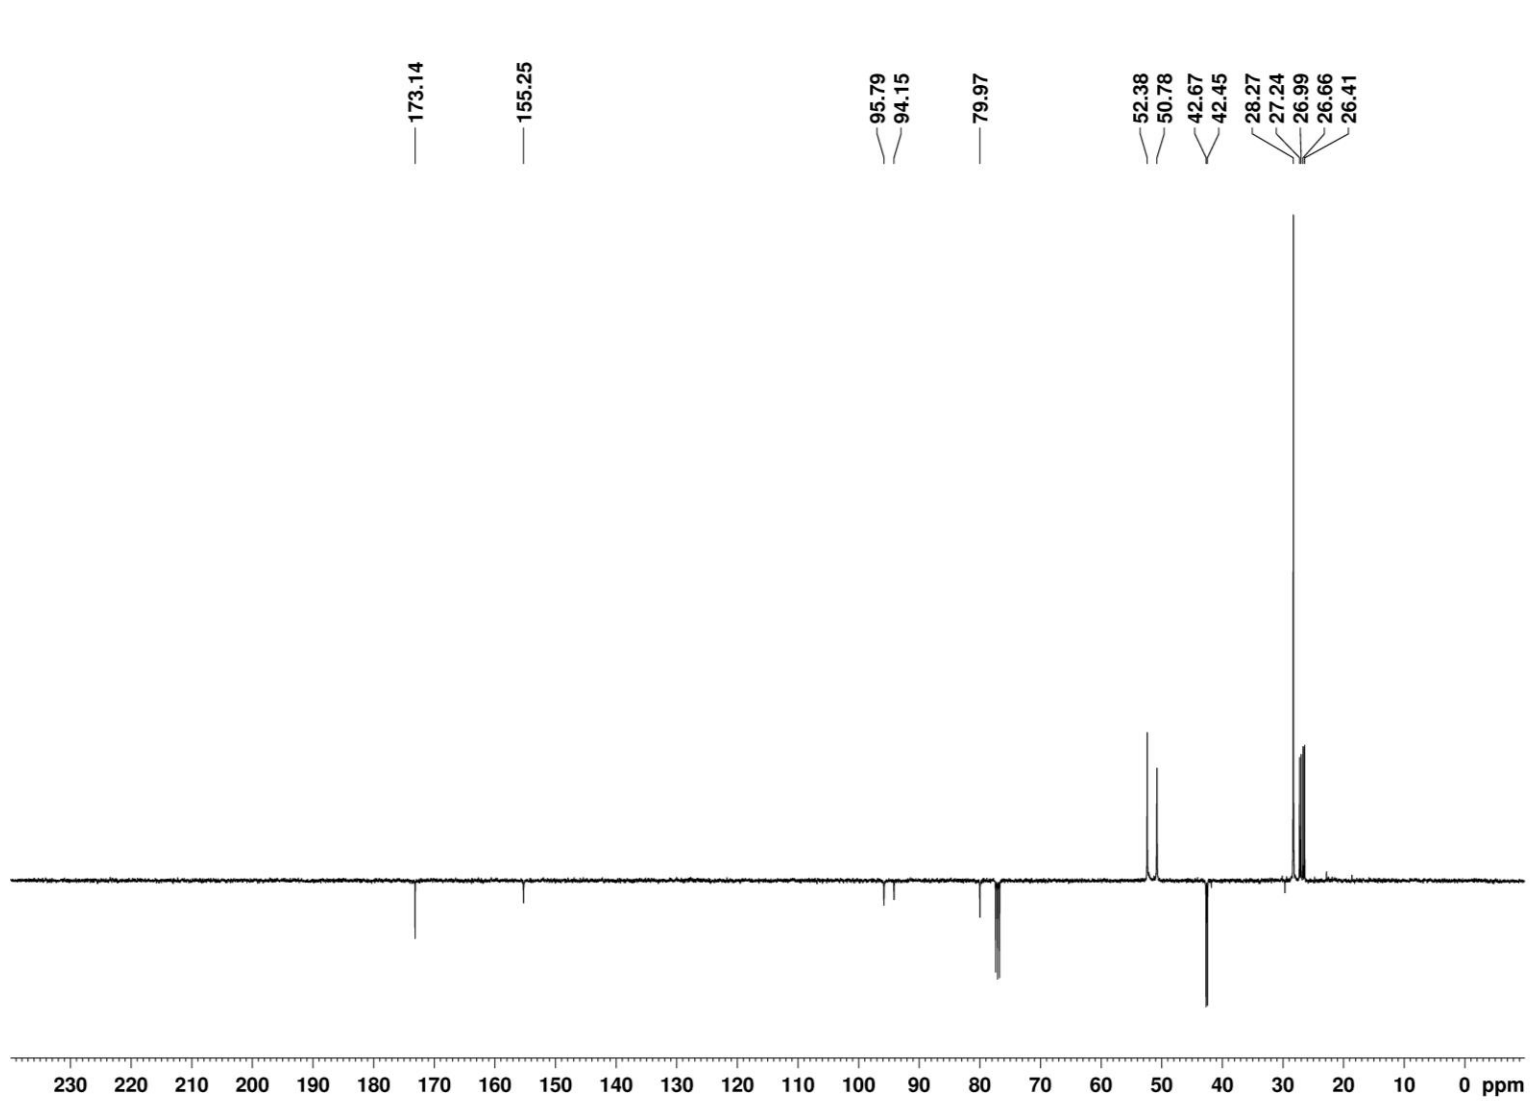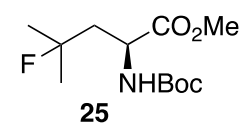

CDCl<sub>3</sub>, 100 MHz

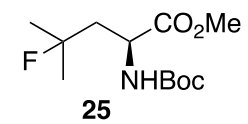

CDCl<sub>3</sub>, 377 MHz

-136.44  
-136.50  
-136.55  
-136.61  
-136.67  
-136.72  
-136.78  
-136.84  
-136.89  
-136.94

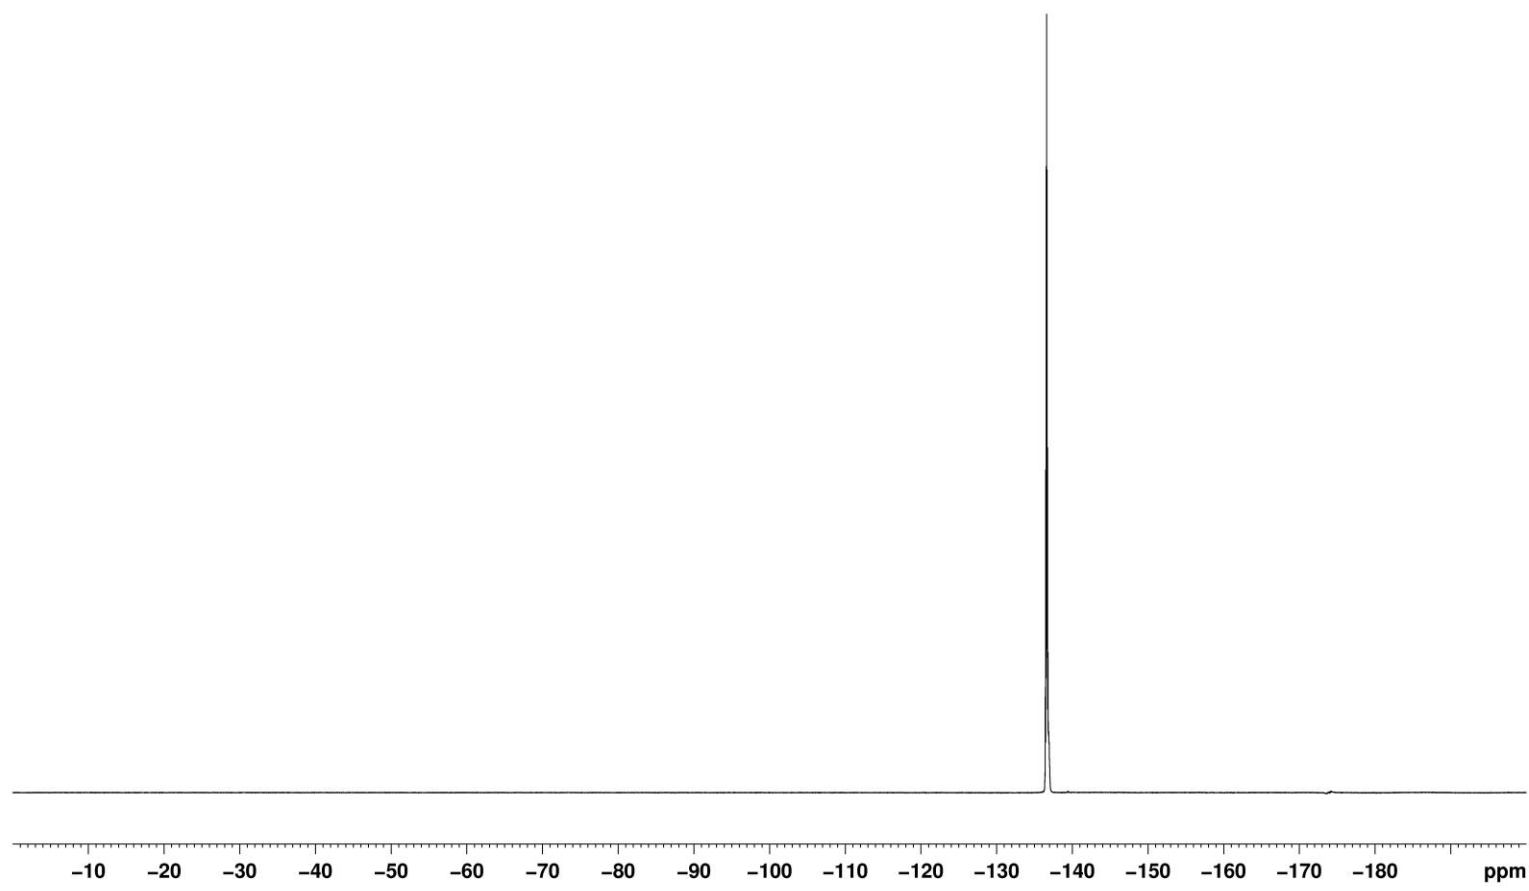

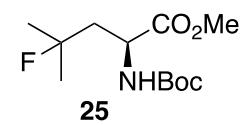

CDCl<sub>3</sub>, {<sup>1</sup>H} 377 MHz

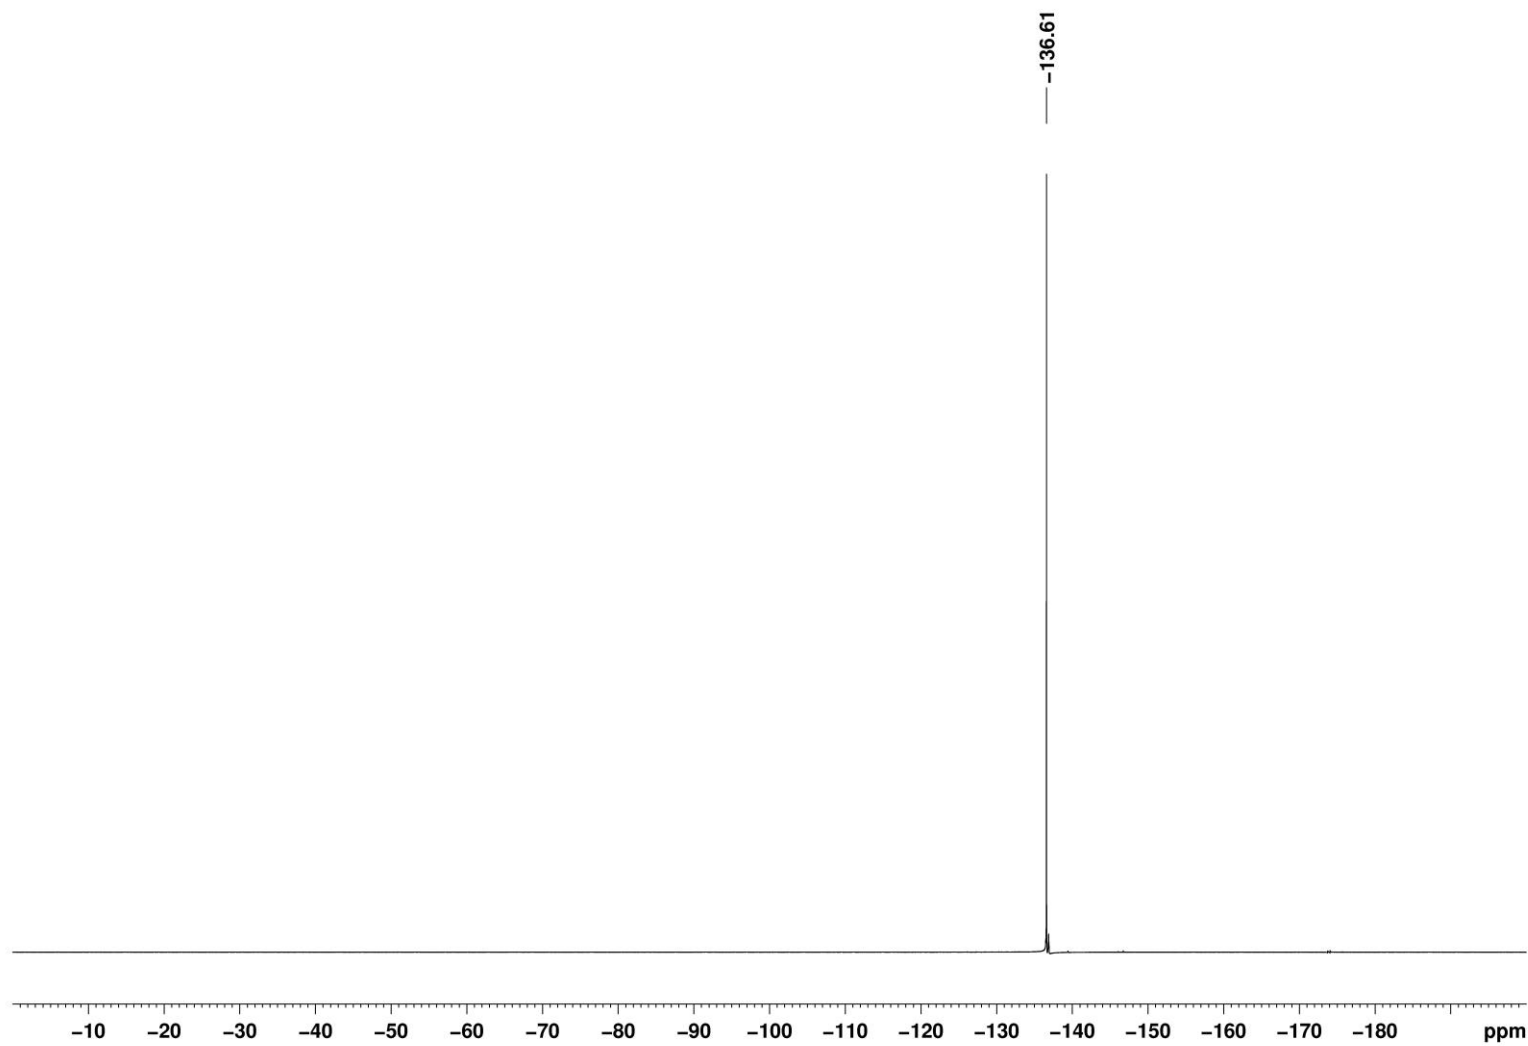

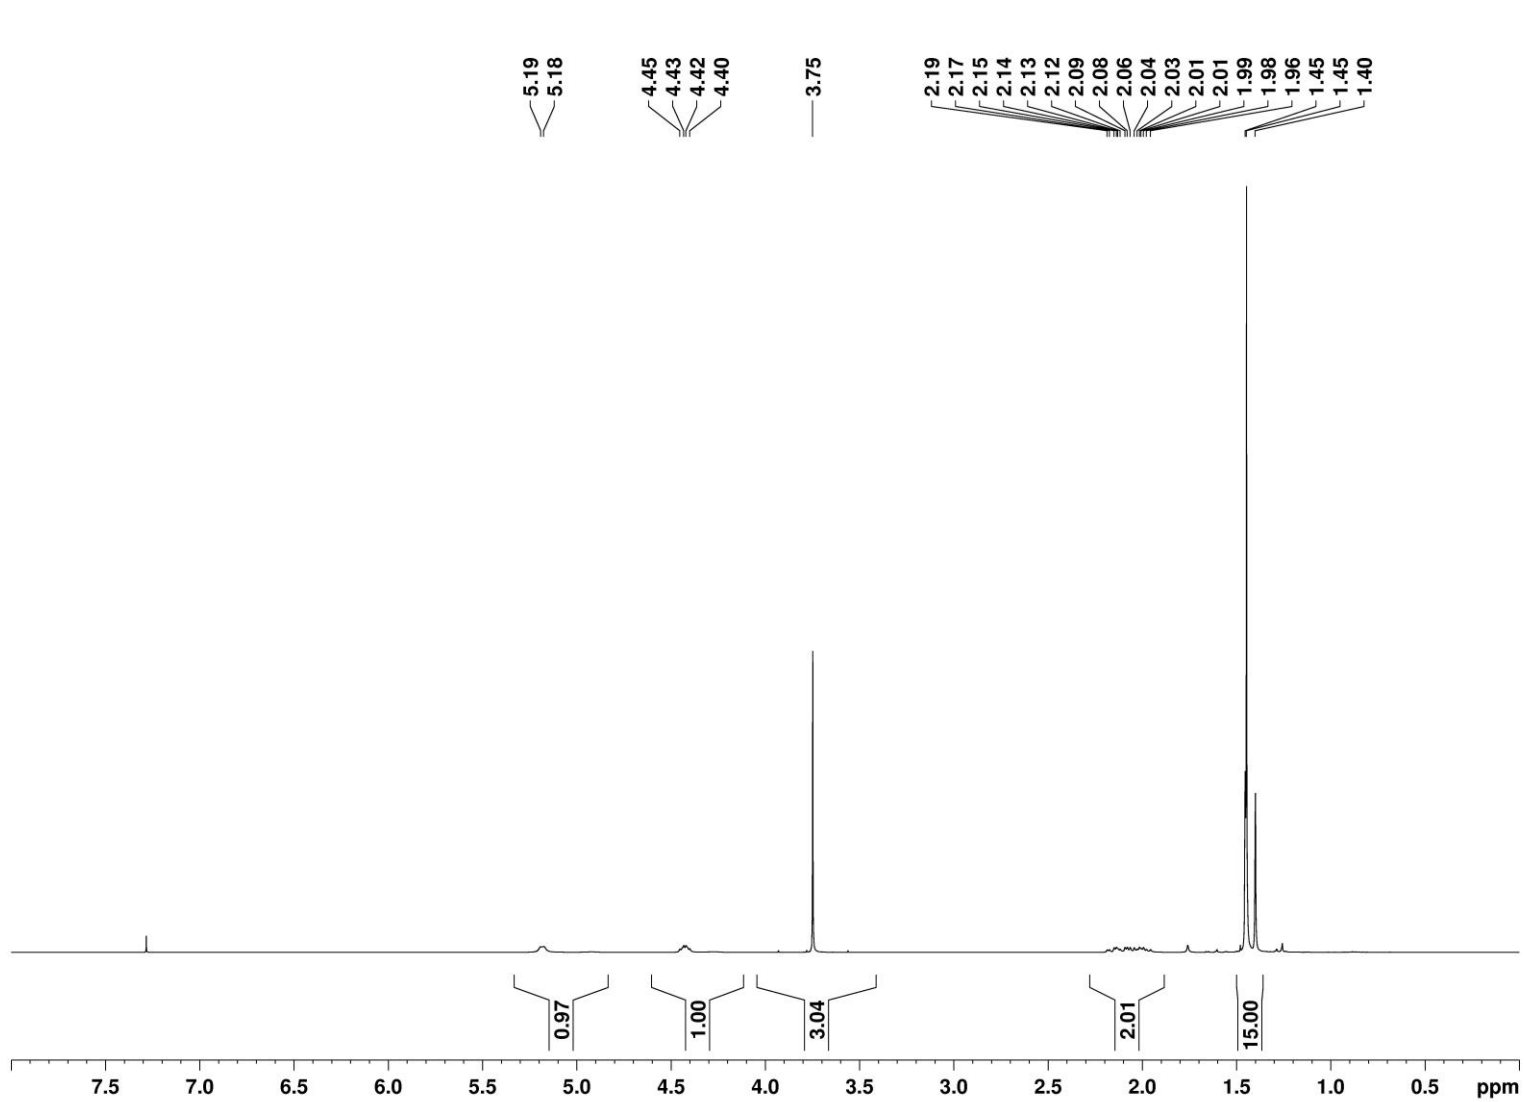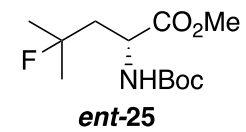

CDCl<sub>3</sub>, 400 MHz

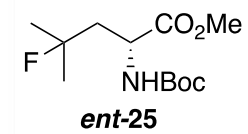

CDCl<sub>3</sub>, 100 MHz

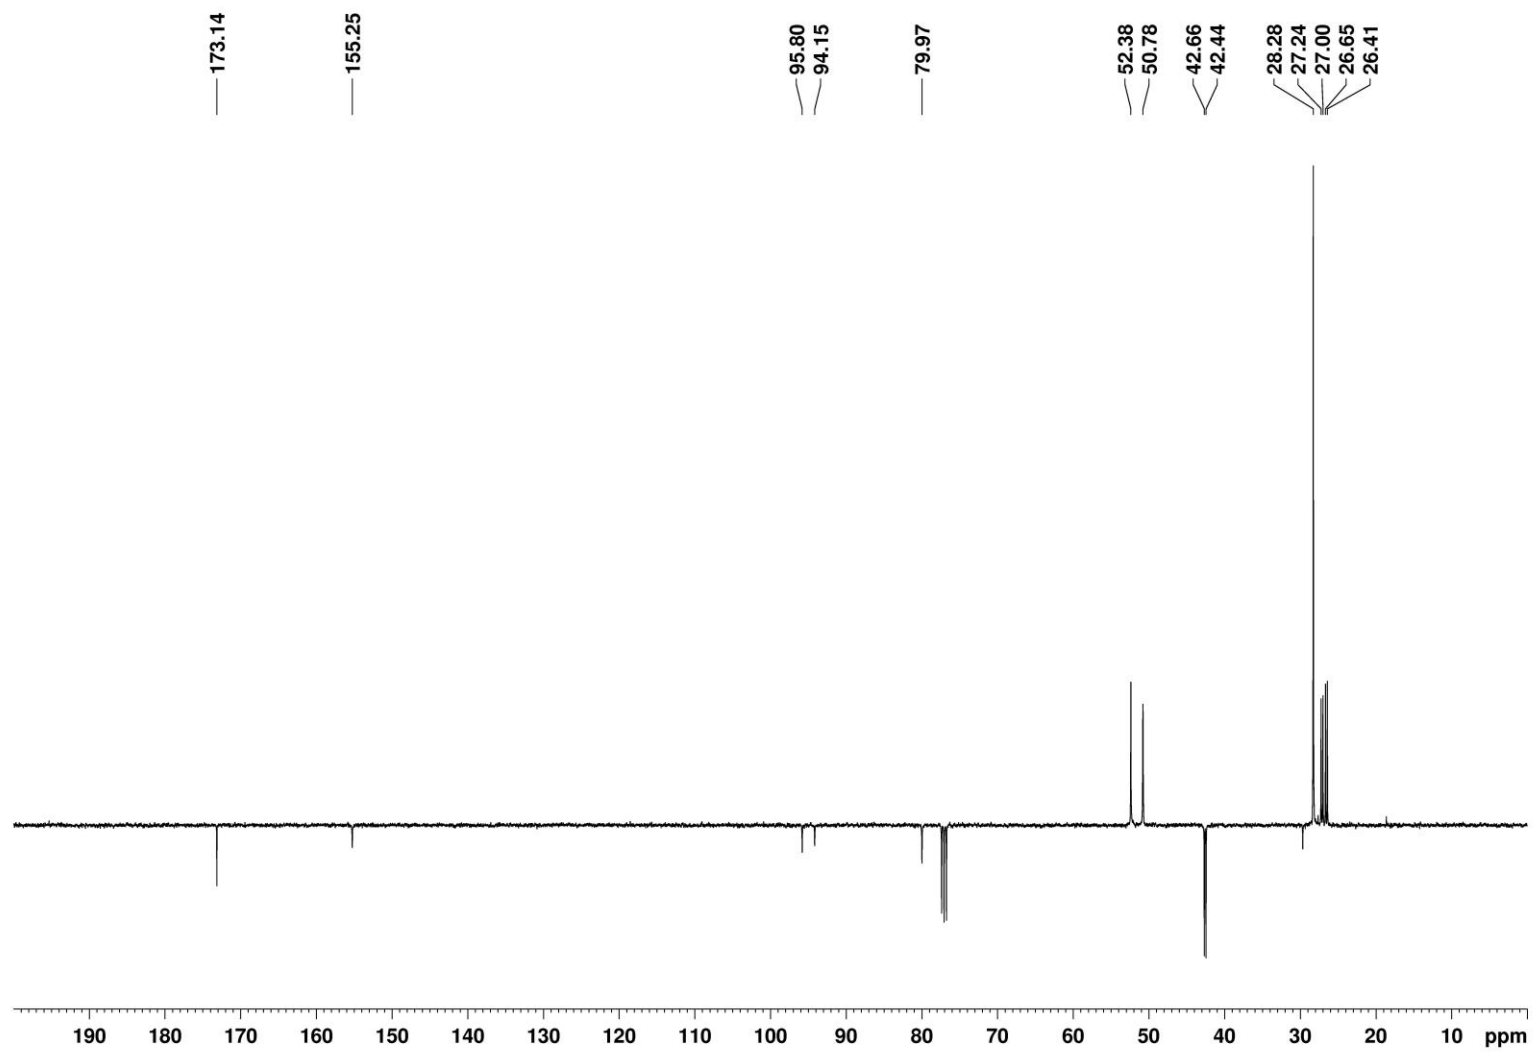

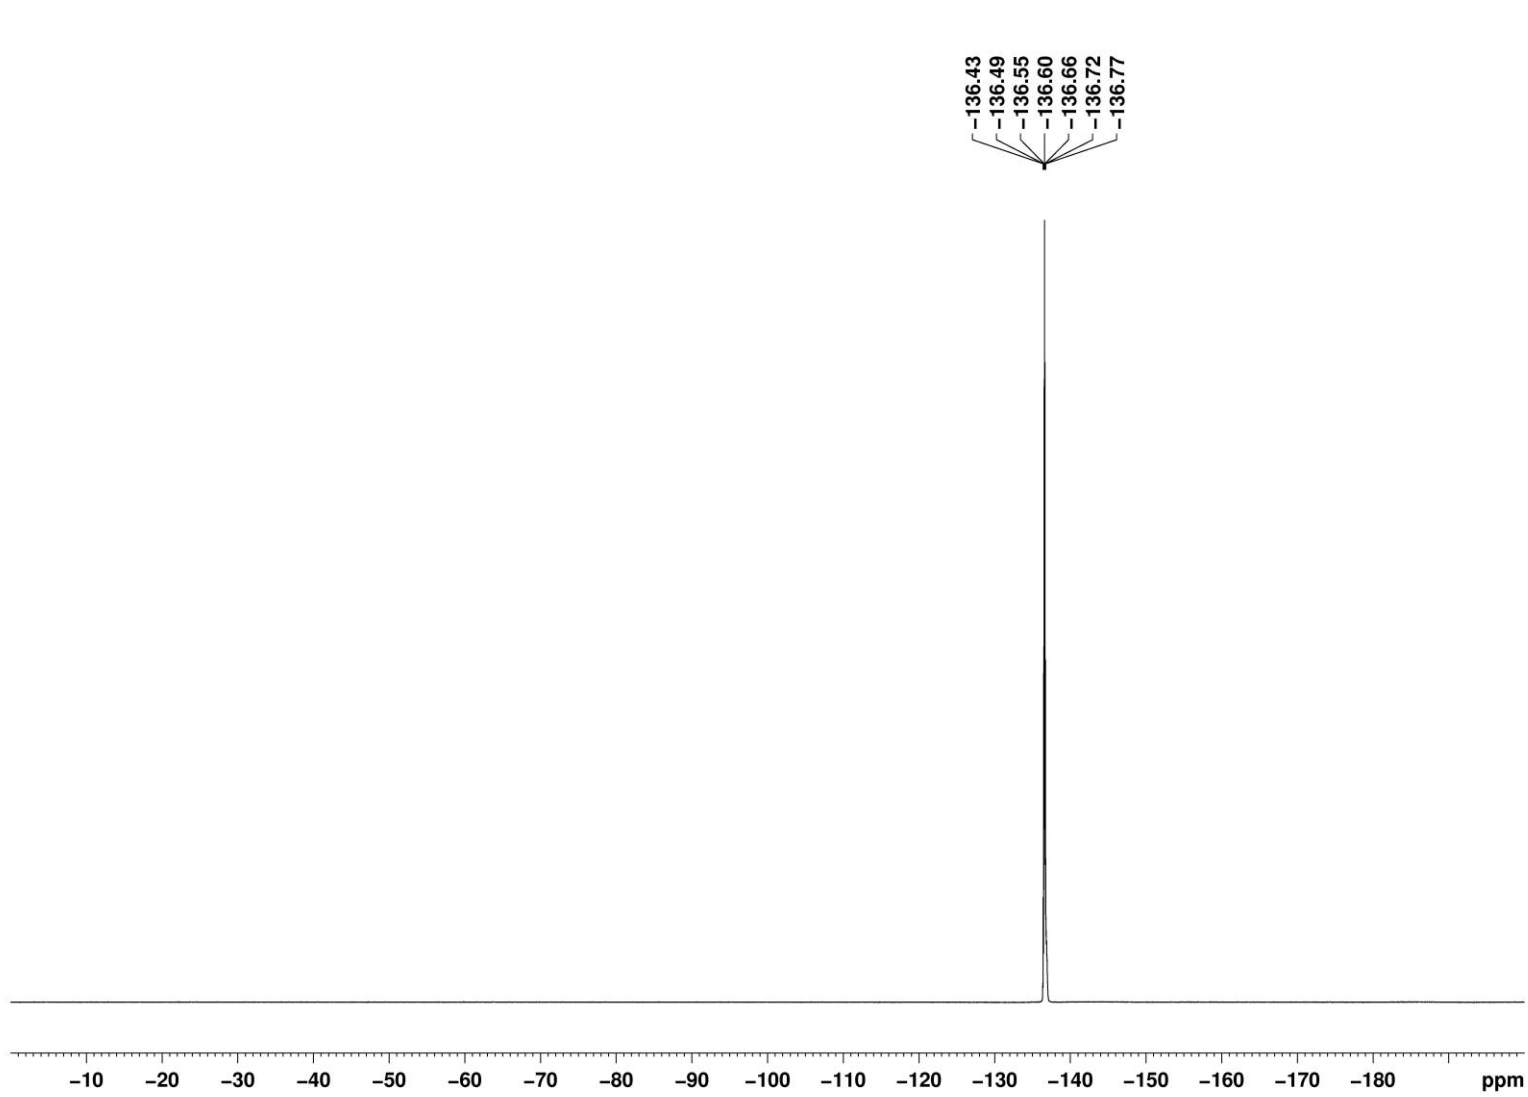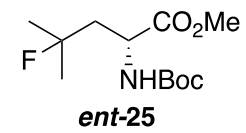

CDCl<sub>3</sub>, 377 MHz

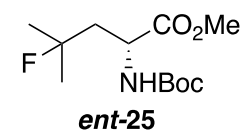

CDCl<sub>3</sub>, {<sup>1</sup>H} 377 MHz

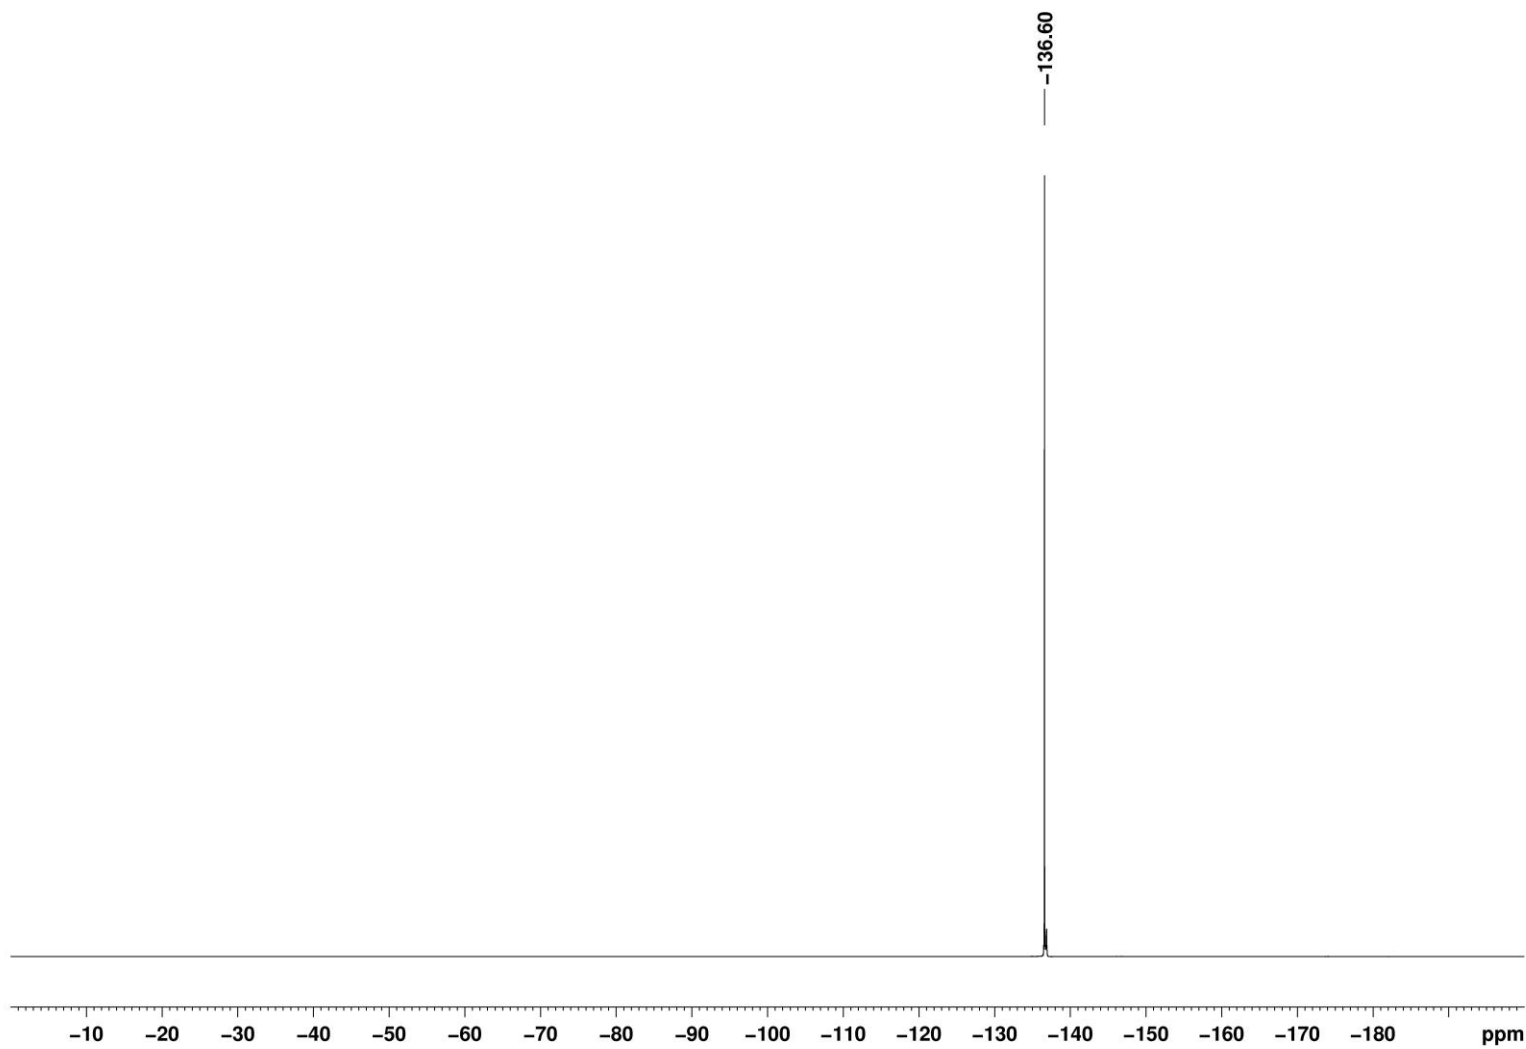



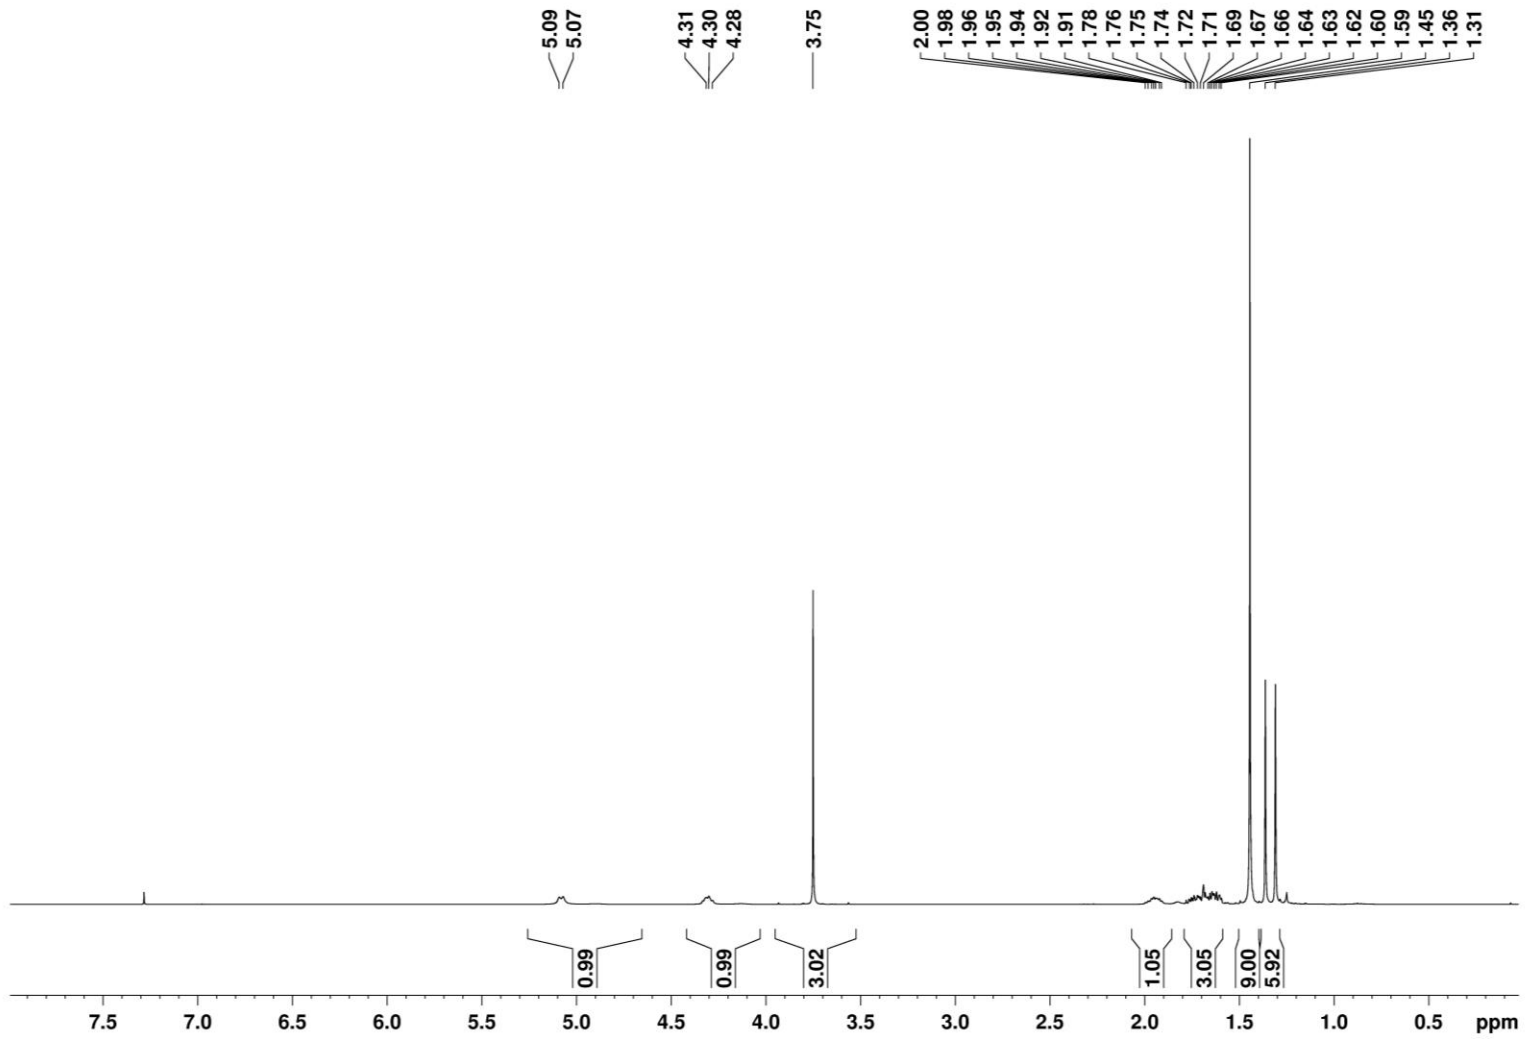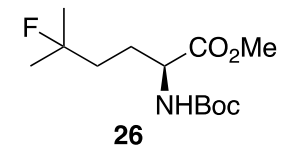

CDCl<sub>3</sub>, 400 MHz

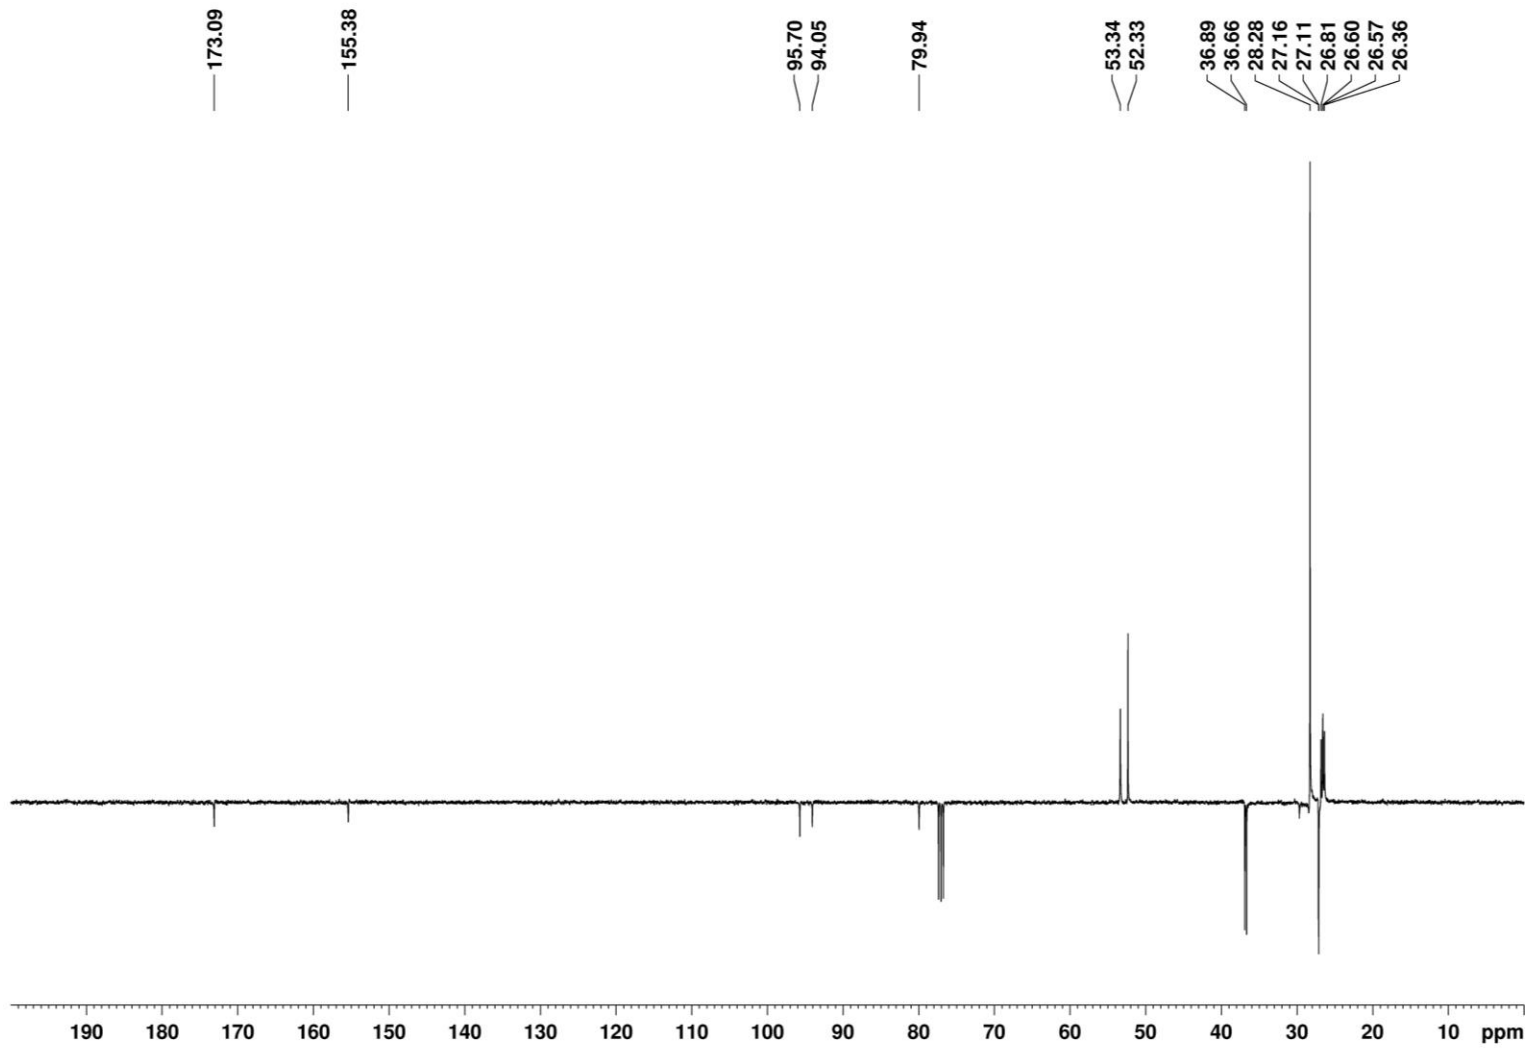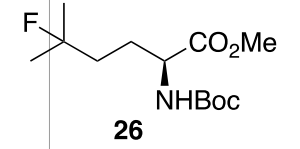

CDCl<sub>3</sub>, 100 MHz

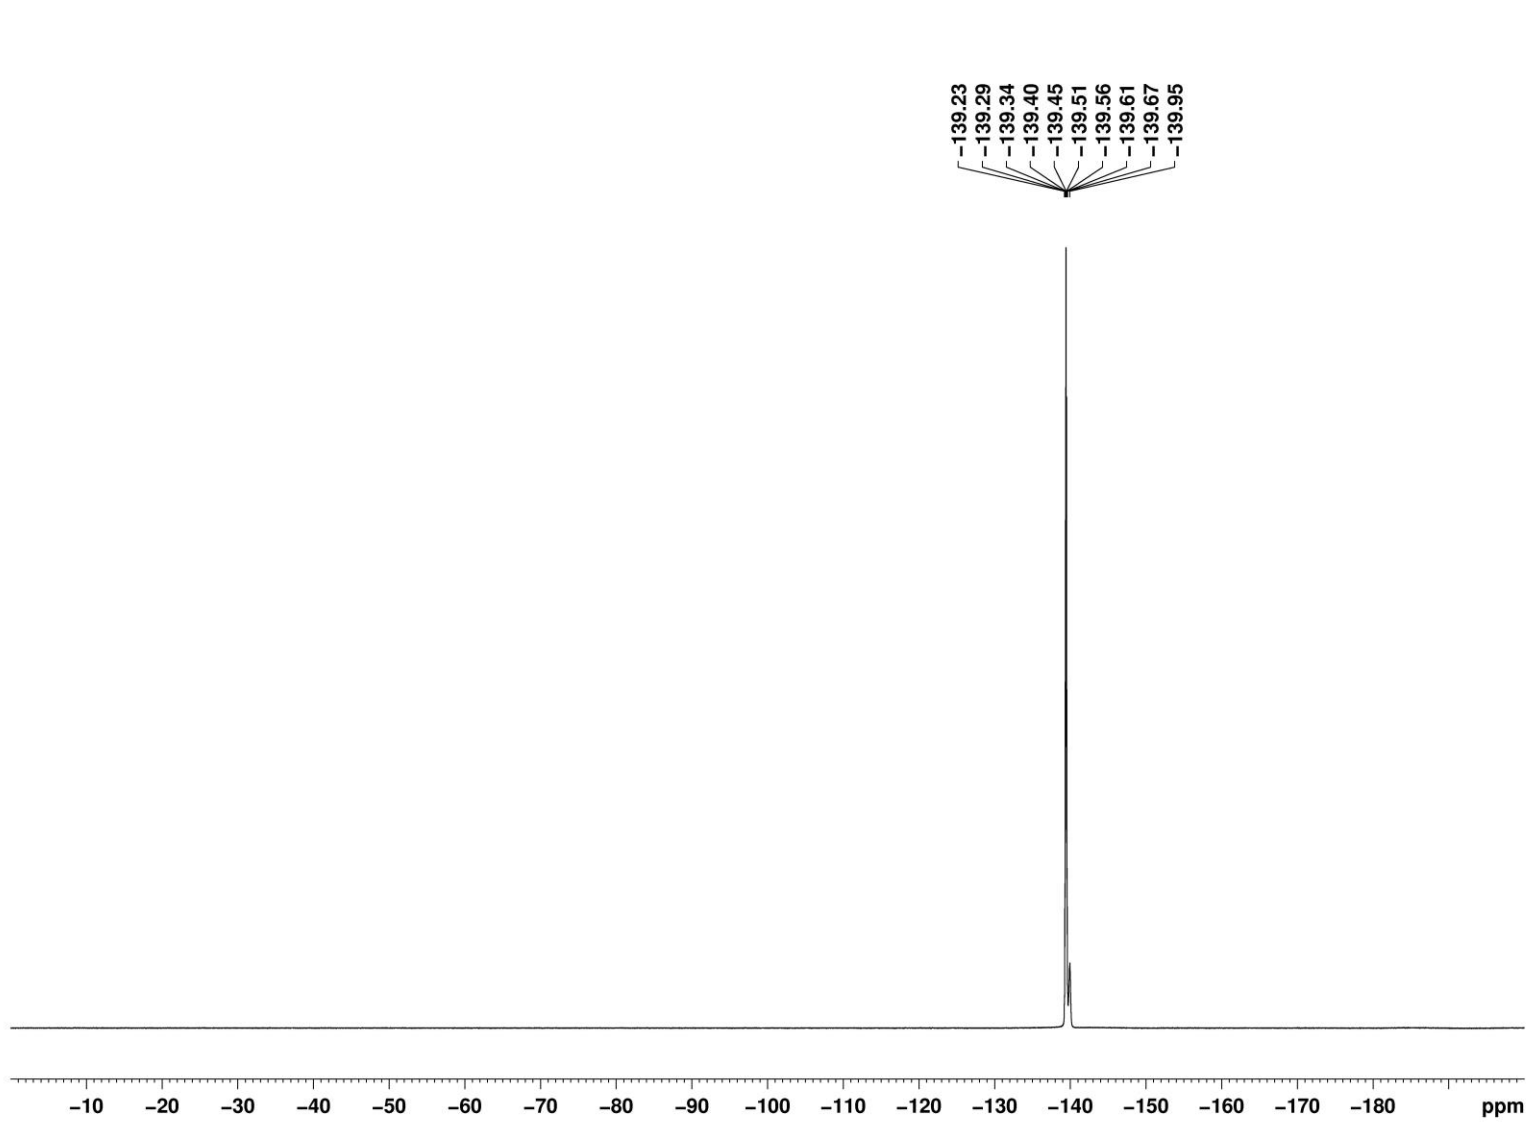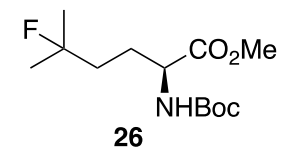

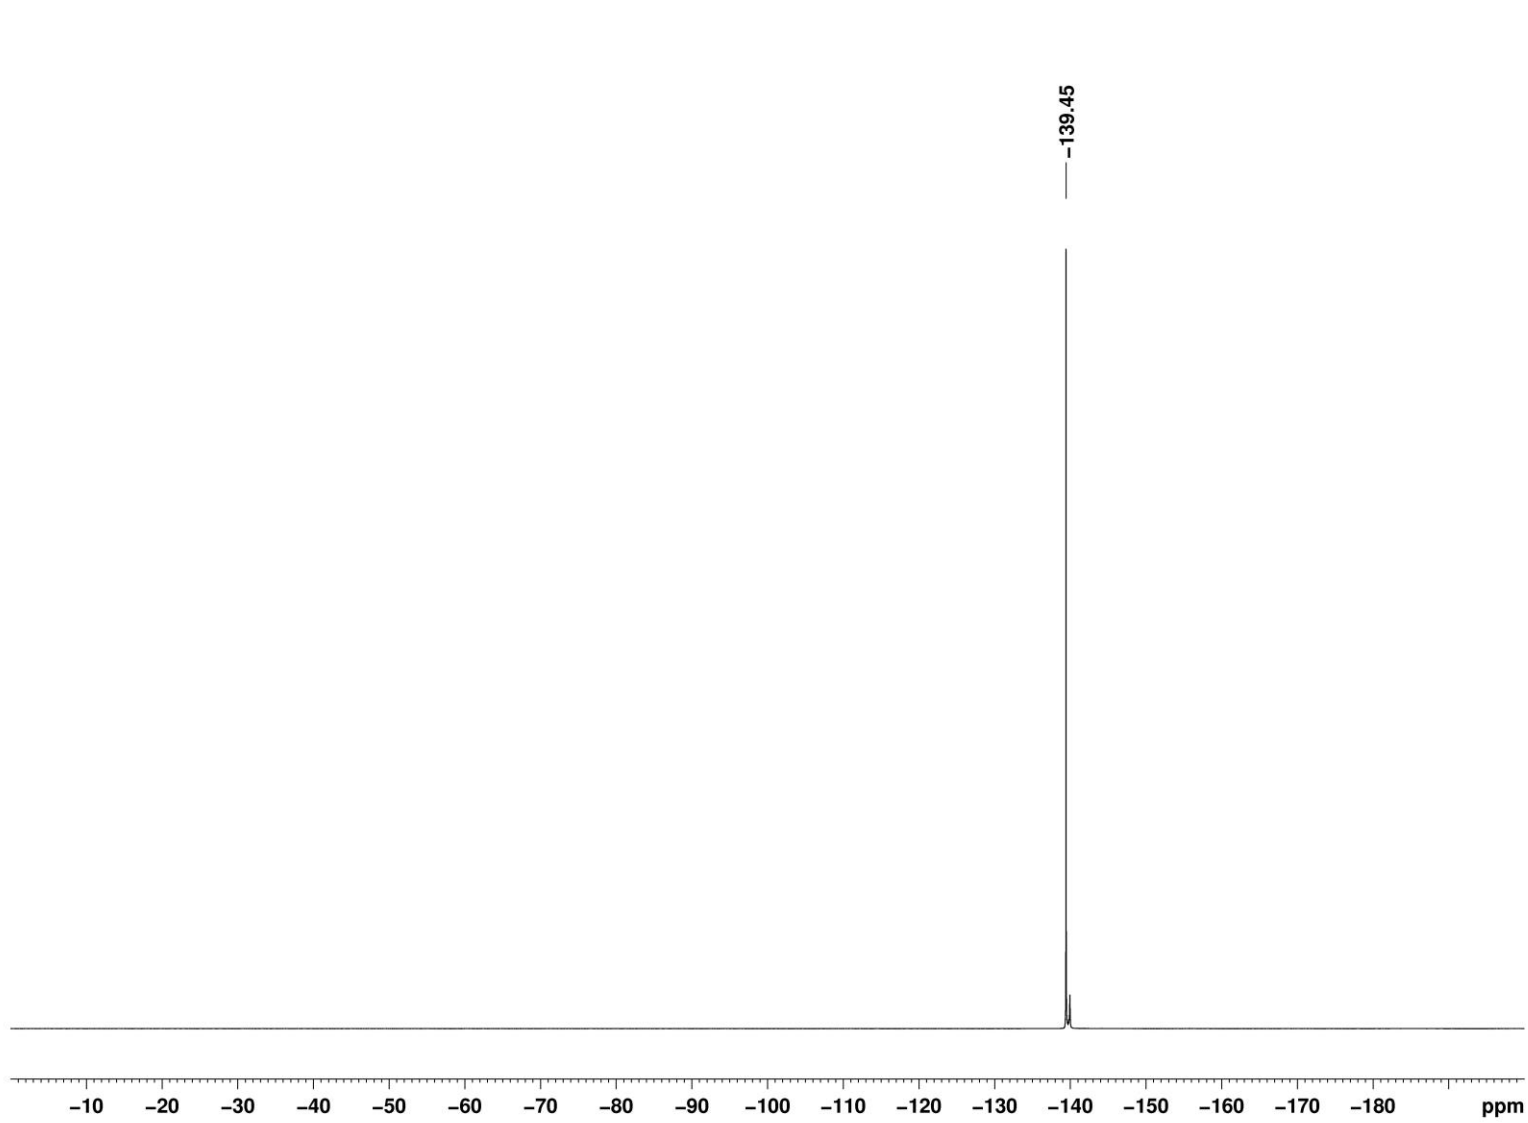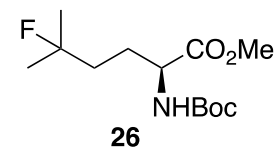

CDCl<sub>3</sub>, {<sup>1</sup>H} 377 MHz

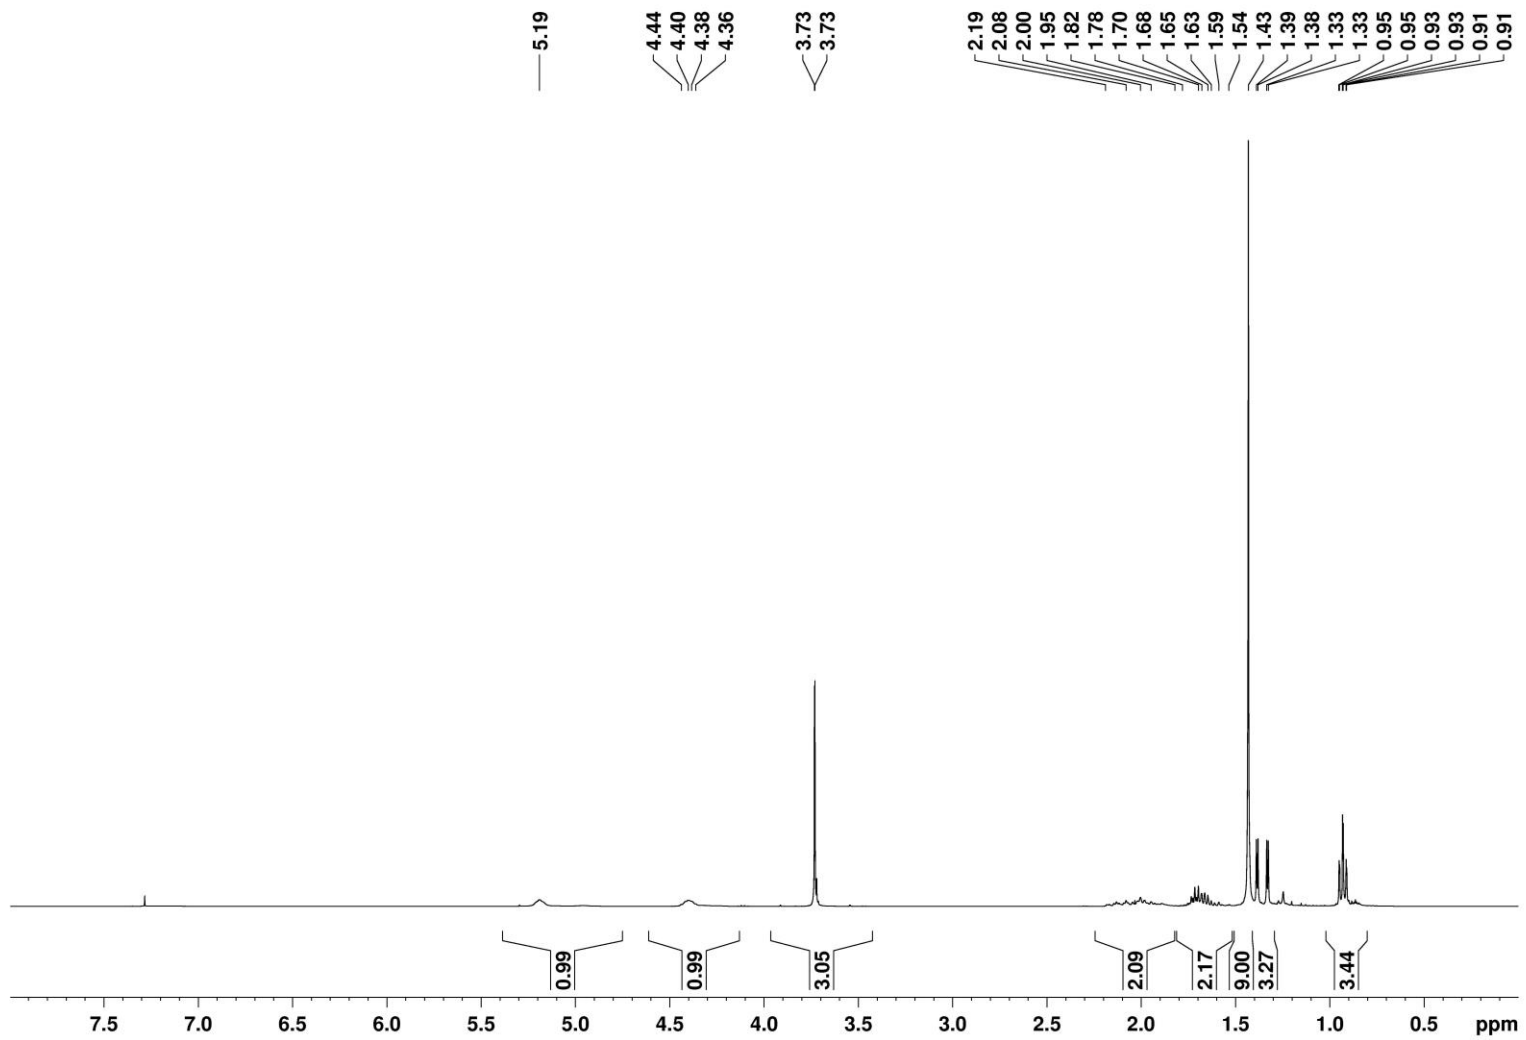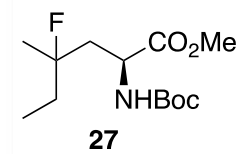

CDCl<sub>3</sub>, 400 MHz

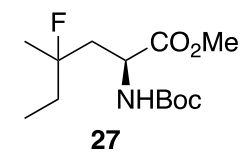

CDCl<sub>3</sub>, 100 MHz

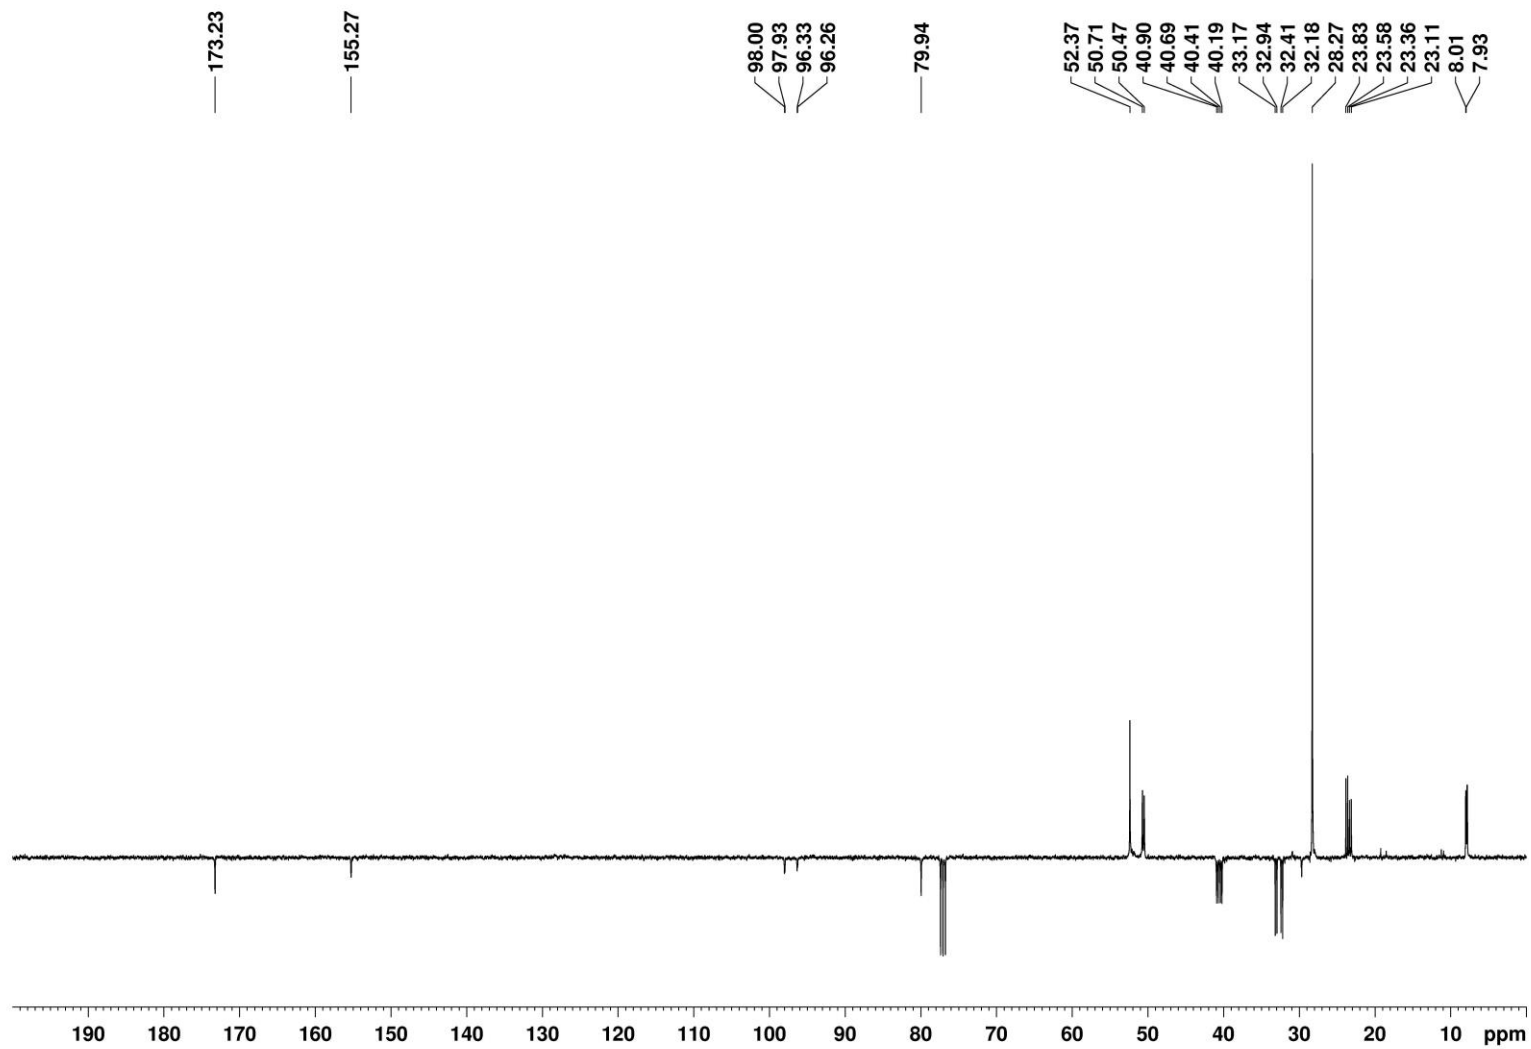

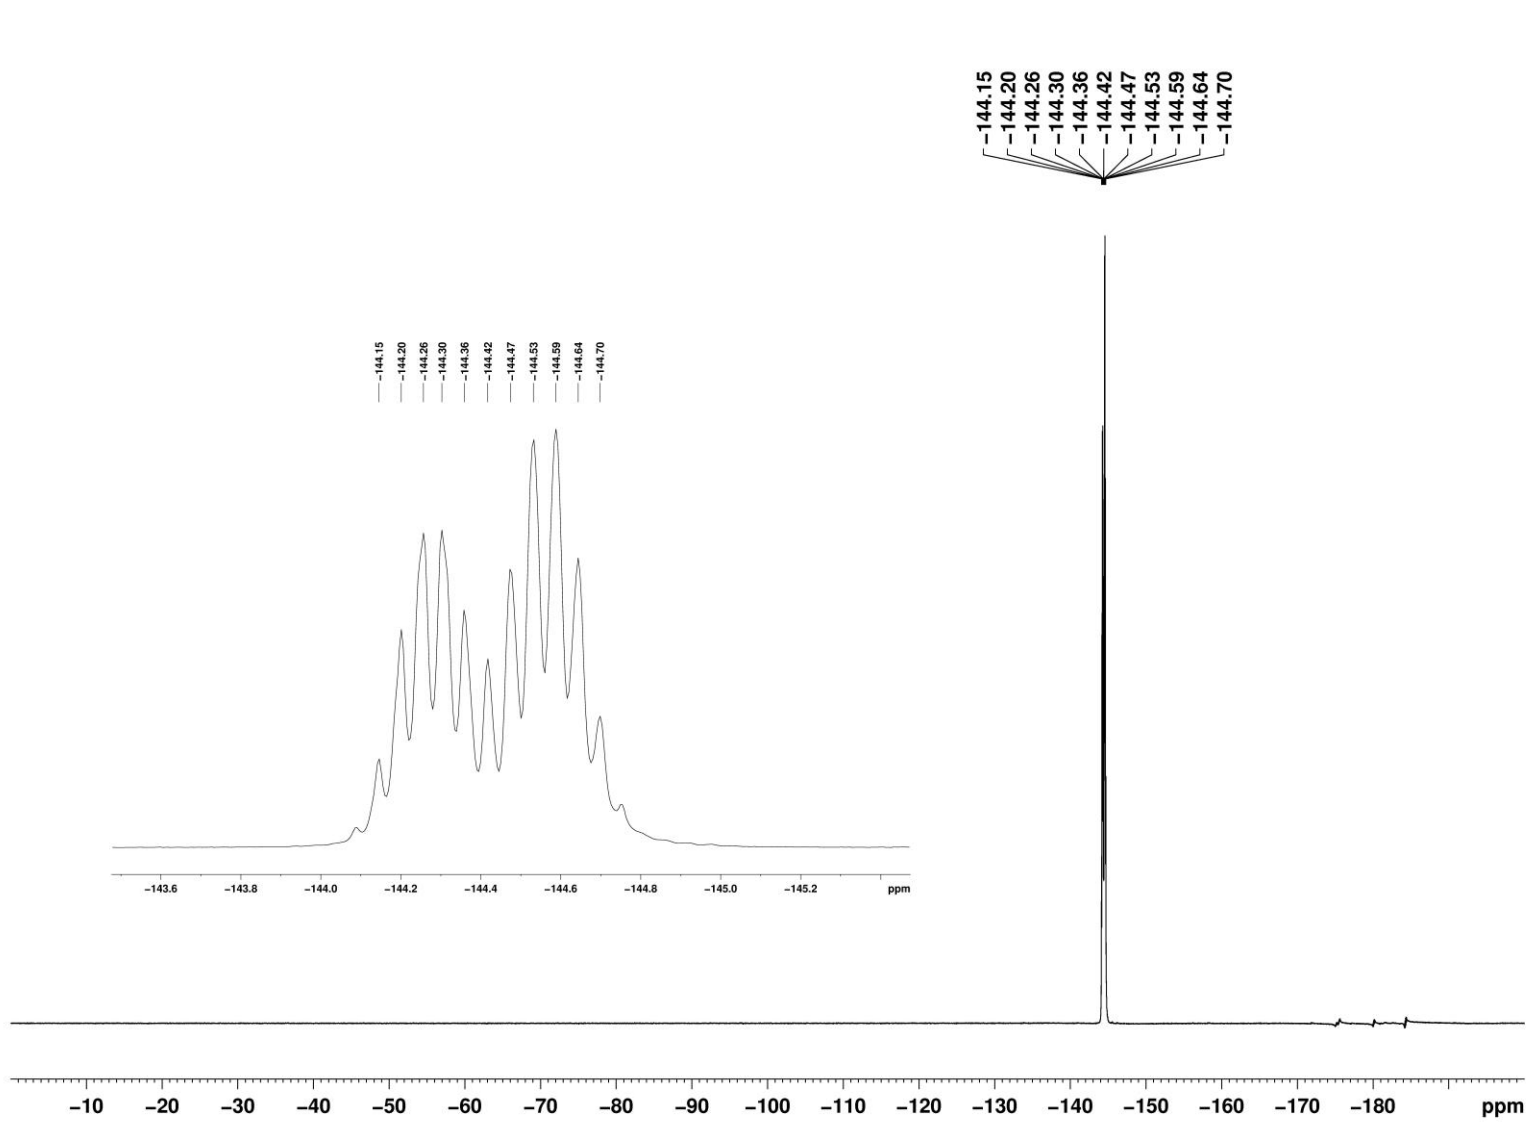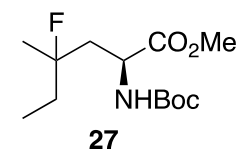

CDCl<sub>3</sub>, 377 MHz

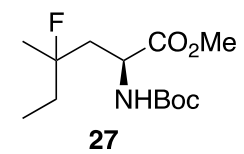

CDCl<sub>3</sub>, {<sup>1</sup>H} 377 MHz

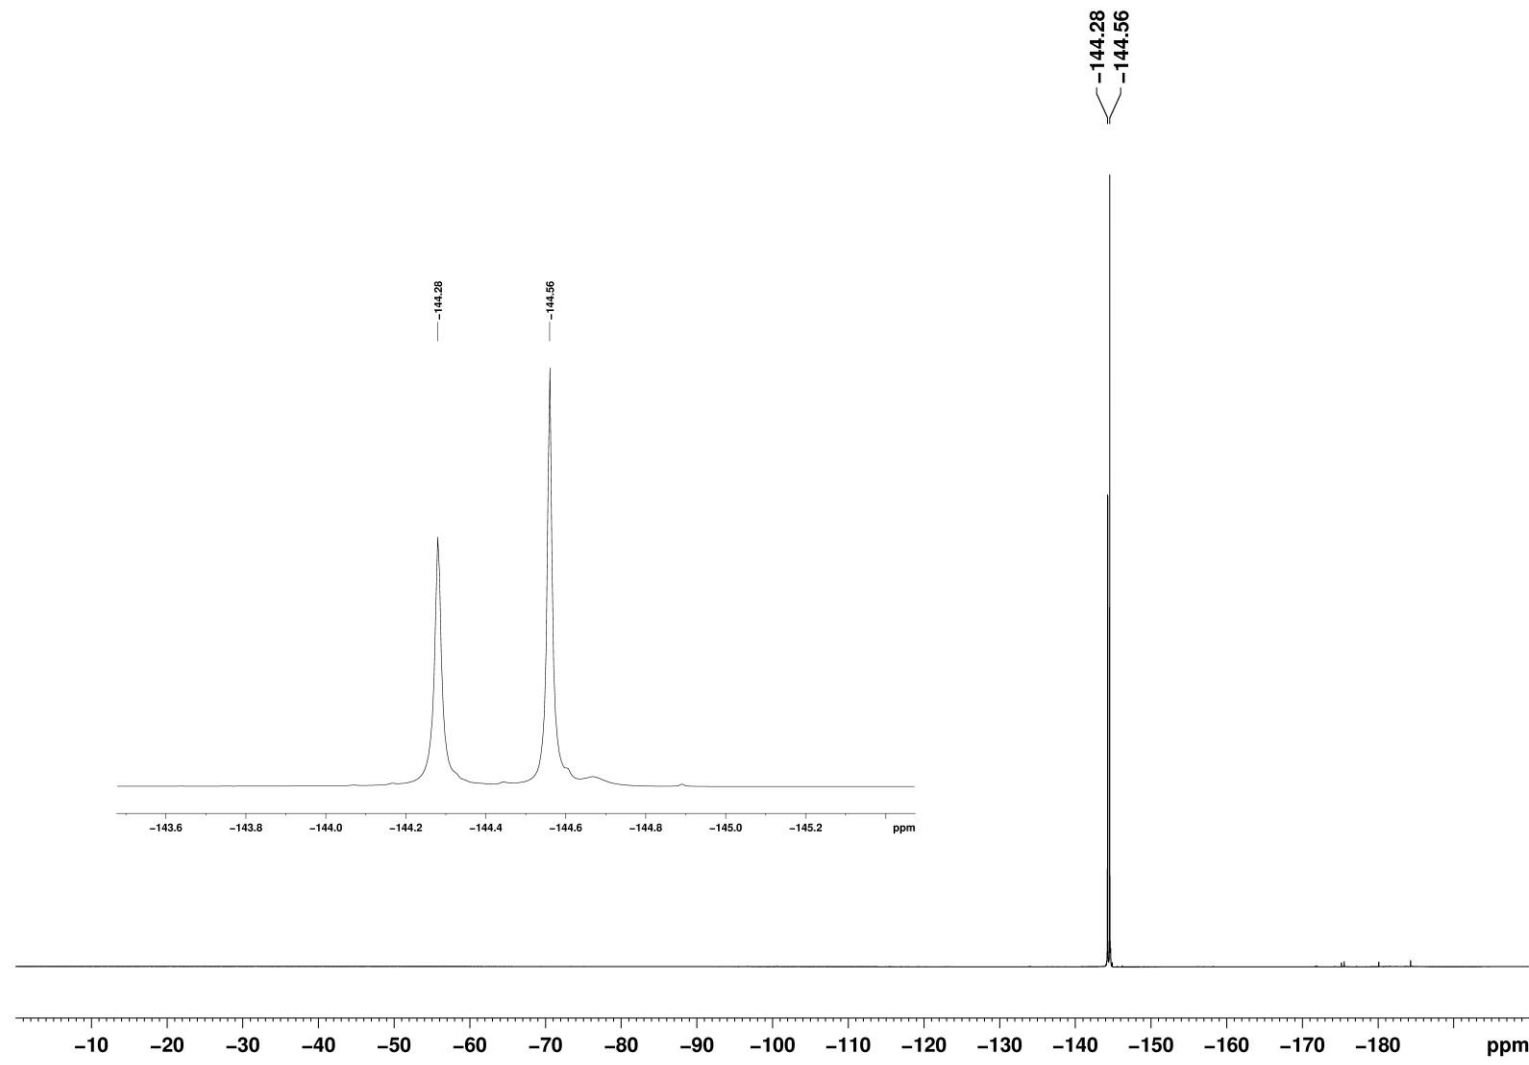



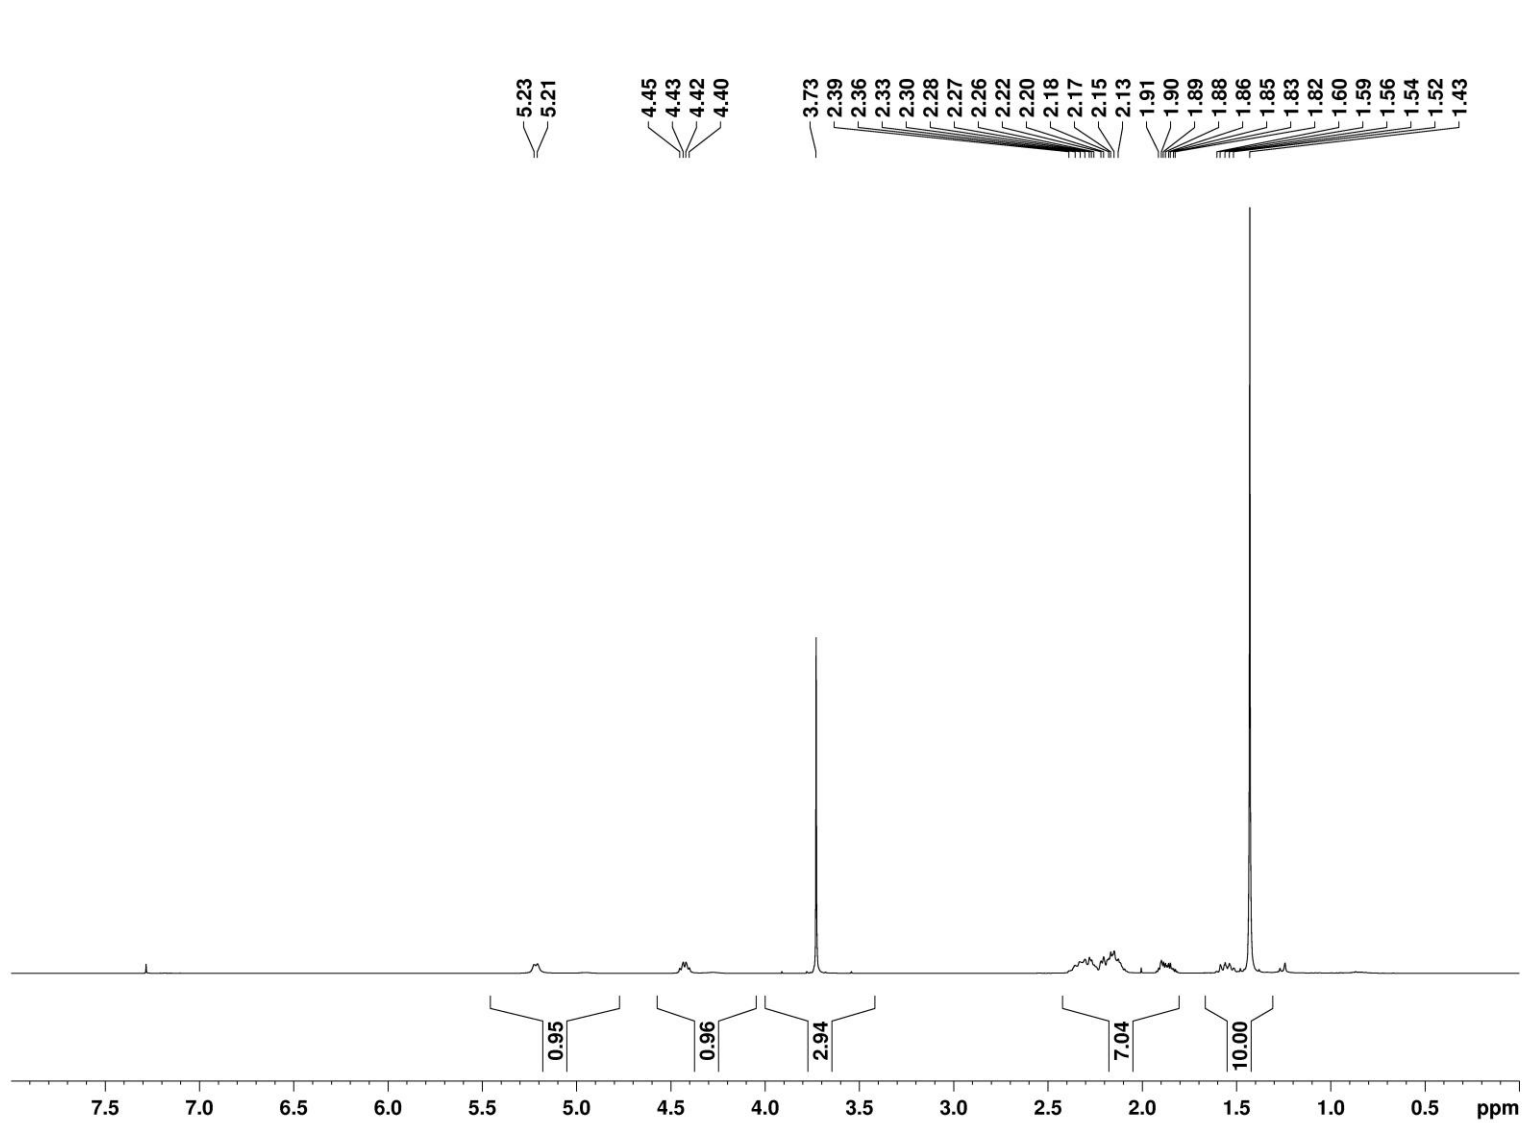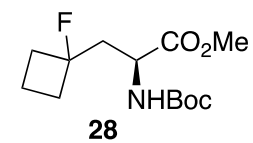

CDCl<sub>3</sub>, 400 MHz

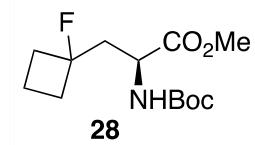

CDCl<sub>3</sub>, 100 MHz

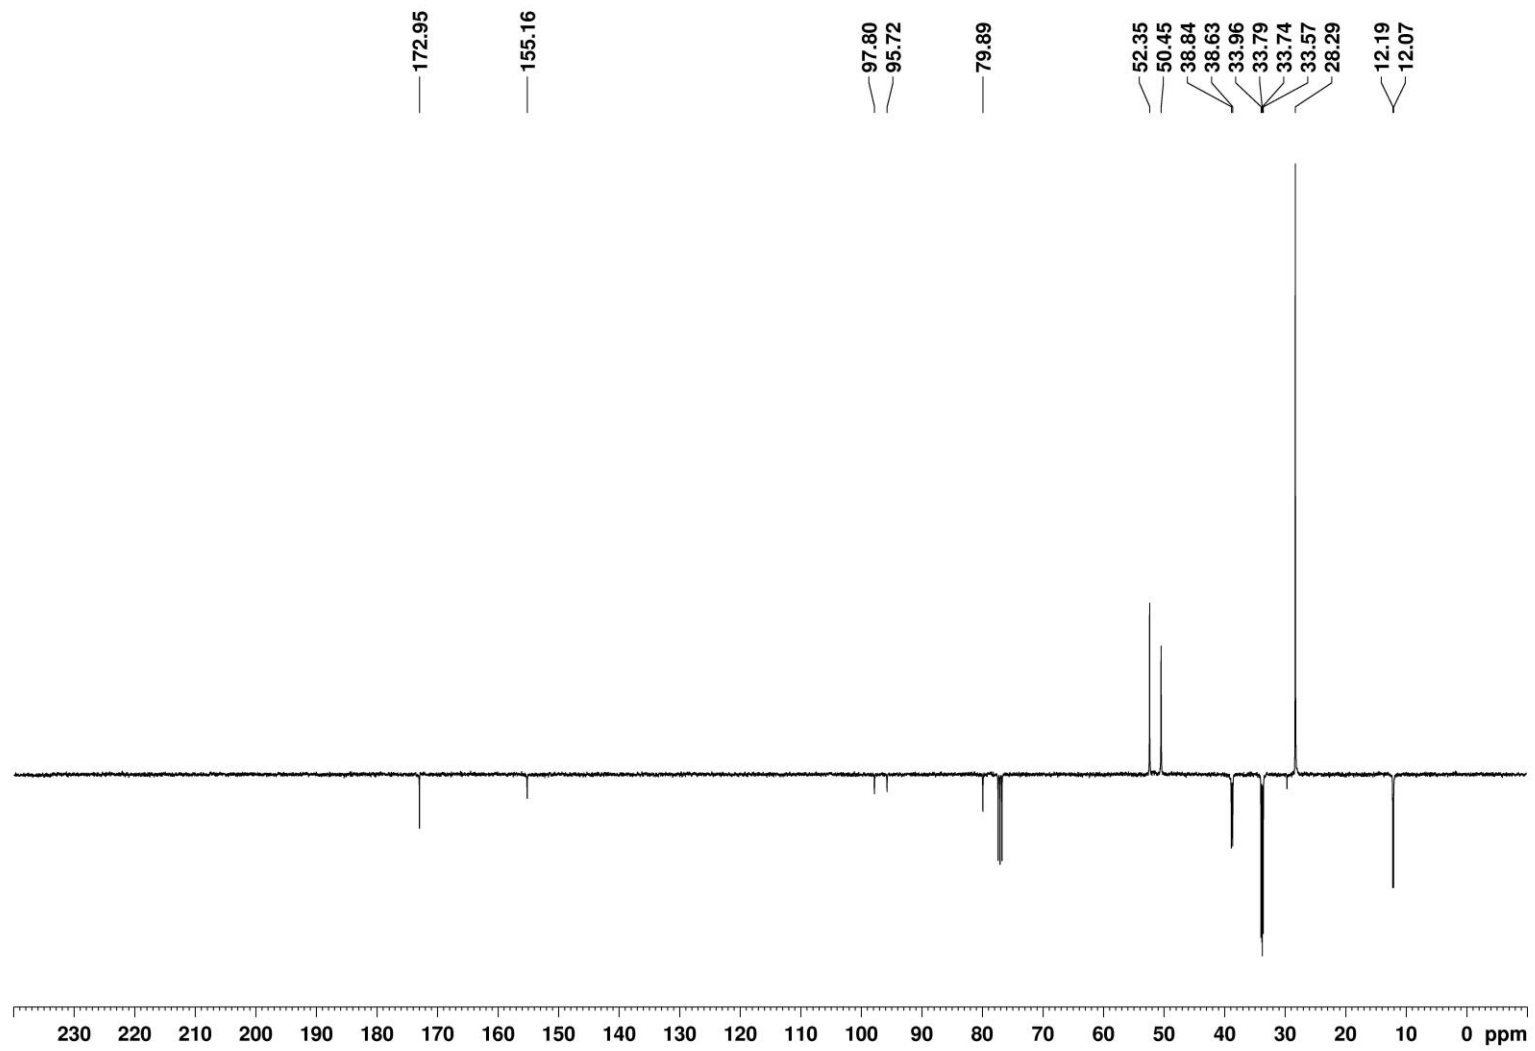

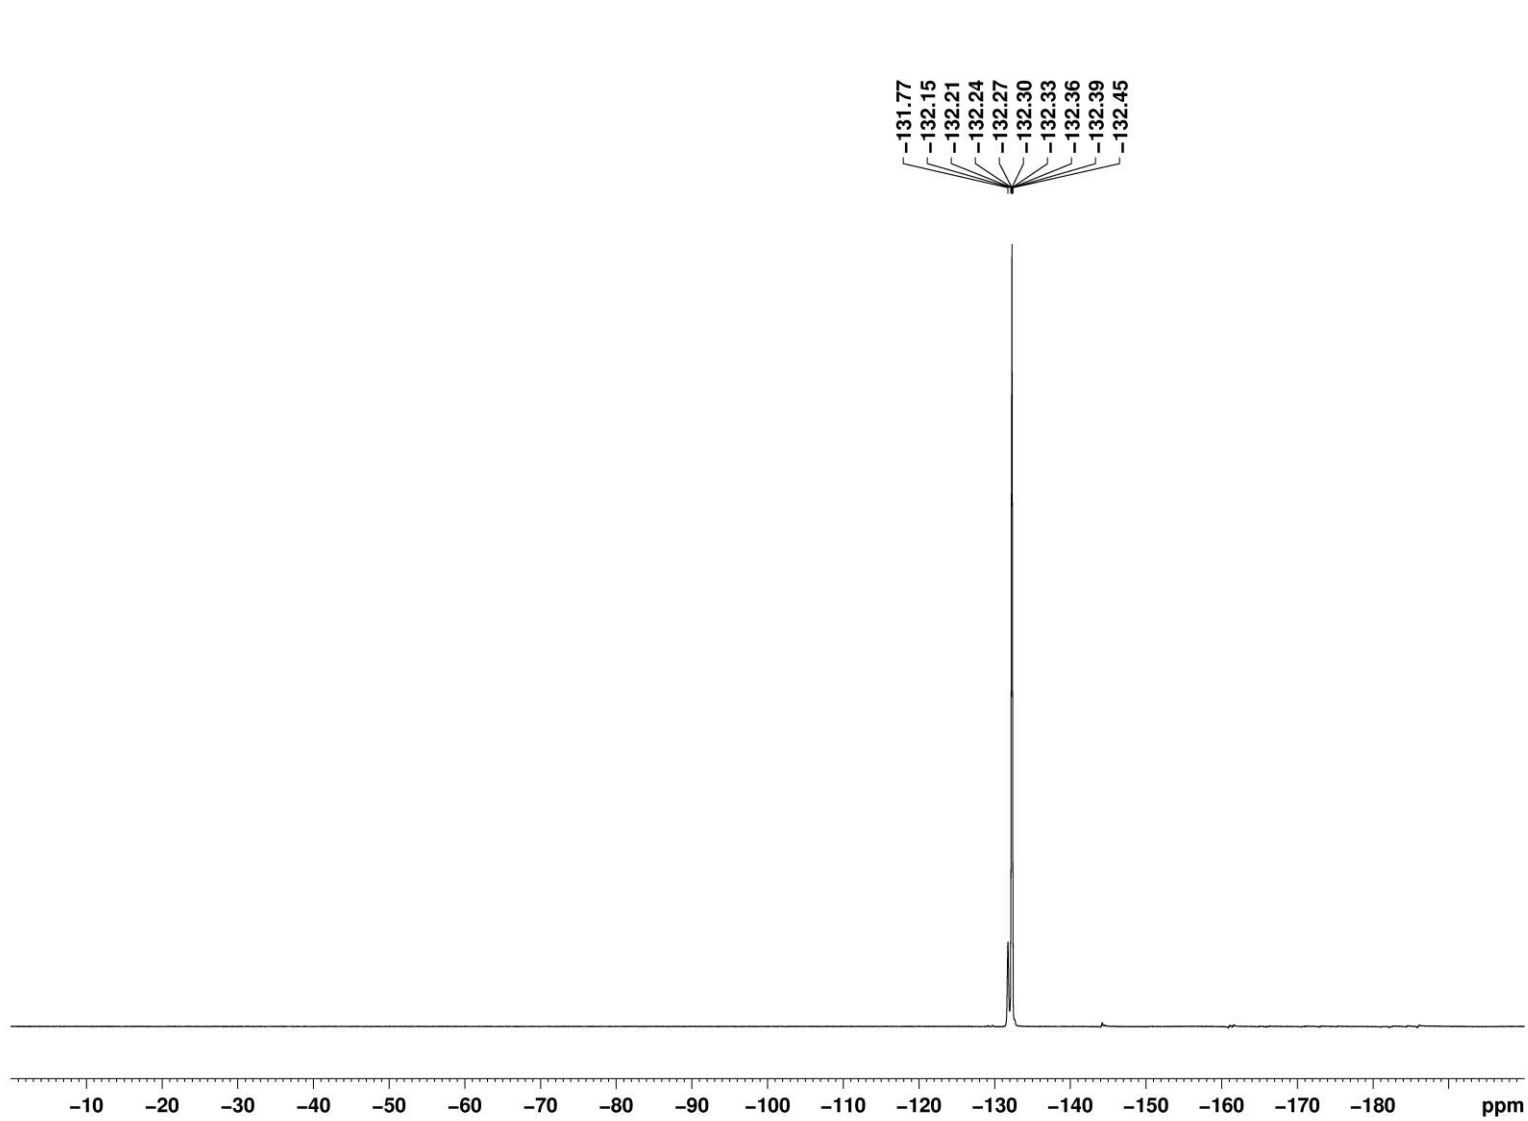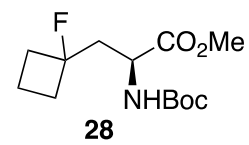

CDCl<sub>3</sub>, 377 MHz

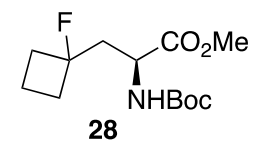

CDCl<sub>3</sub>, {<sup>1</sup>H} 377 MHz

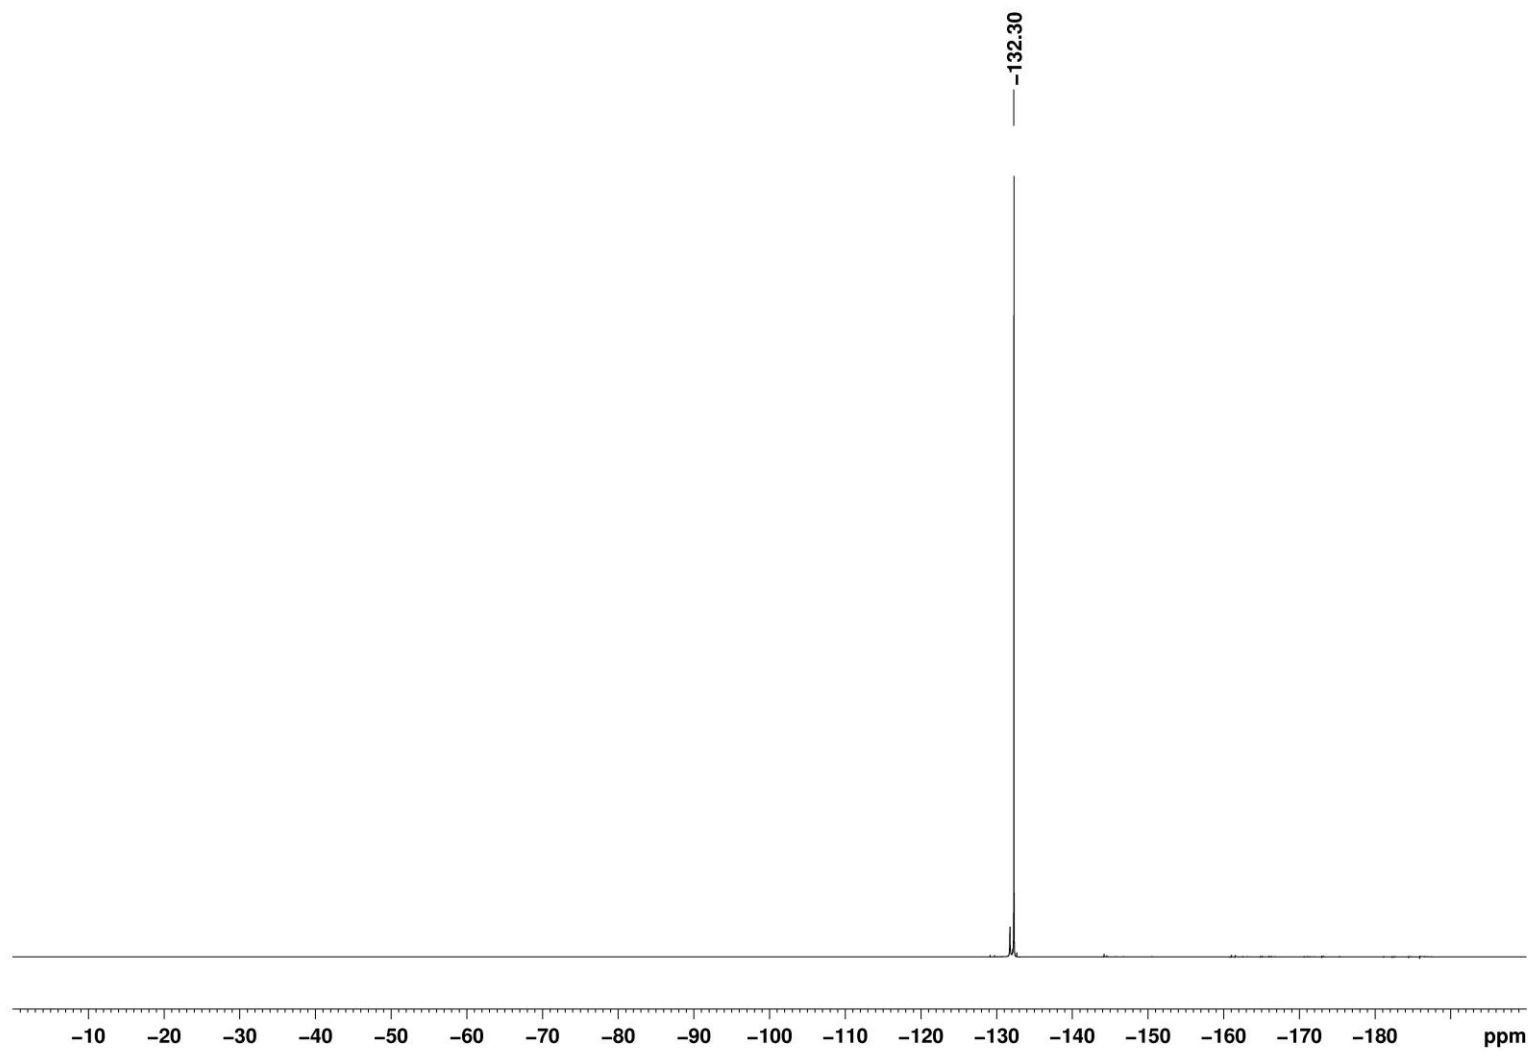

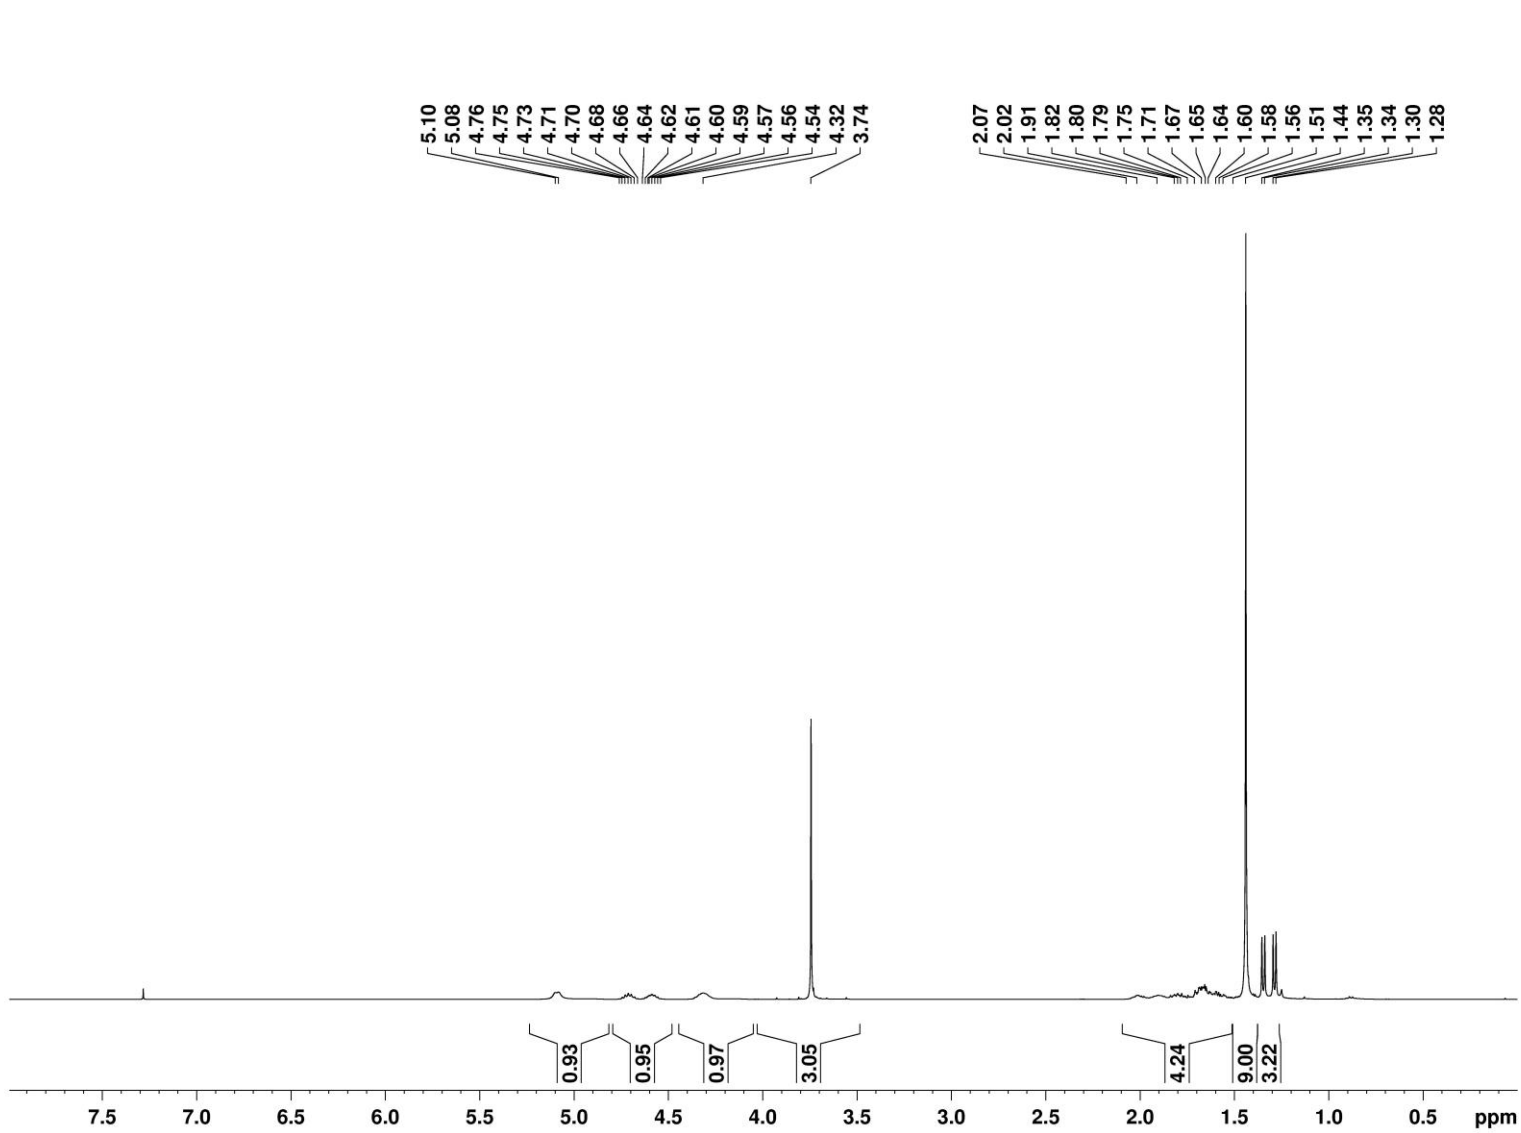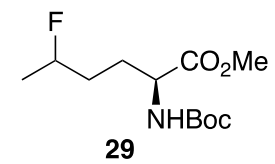

CDCl<sub>3</sub>, 400 MHz

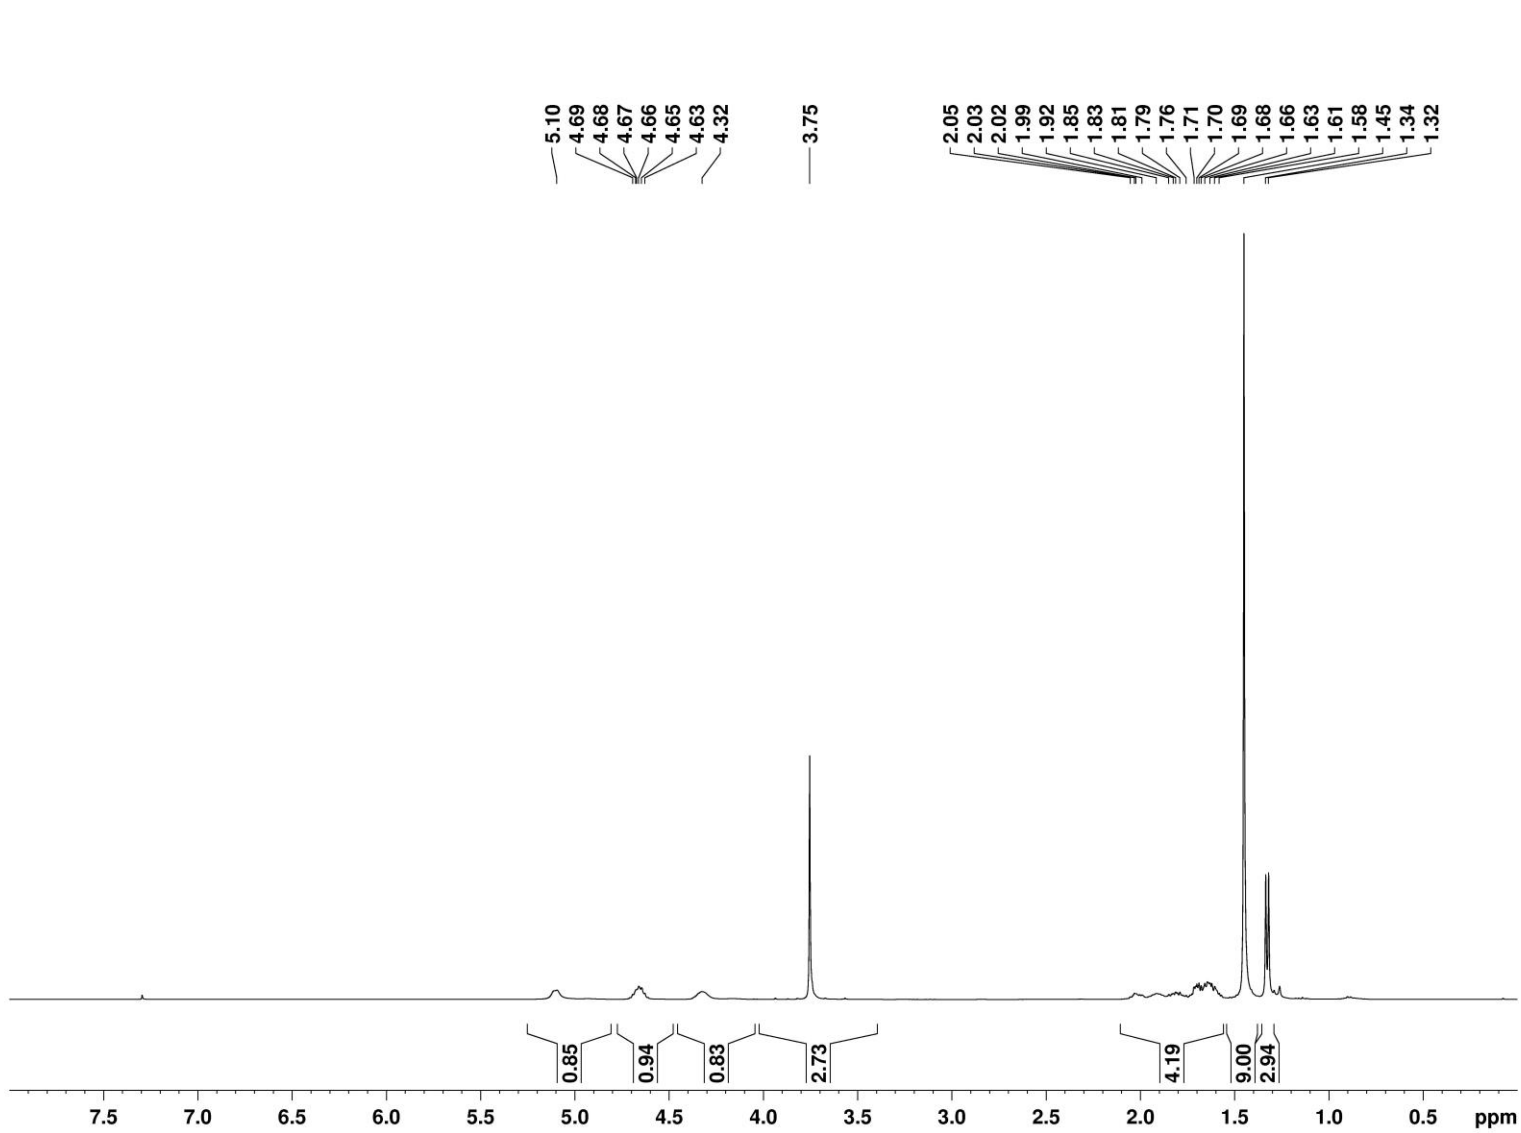

CDCl<sub>3</sub>, {<sup>19</sup>F} 400 MHz

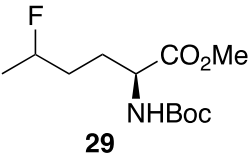

CDCl<sub>3</sub>, 100 MHz

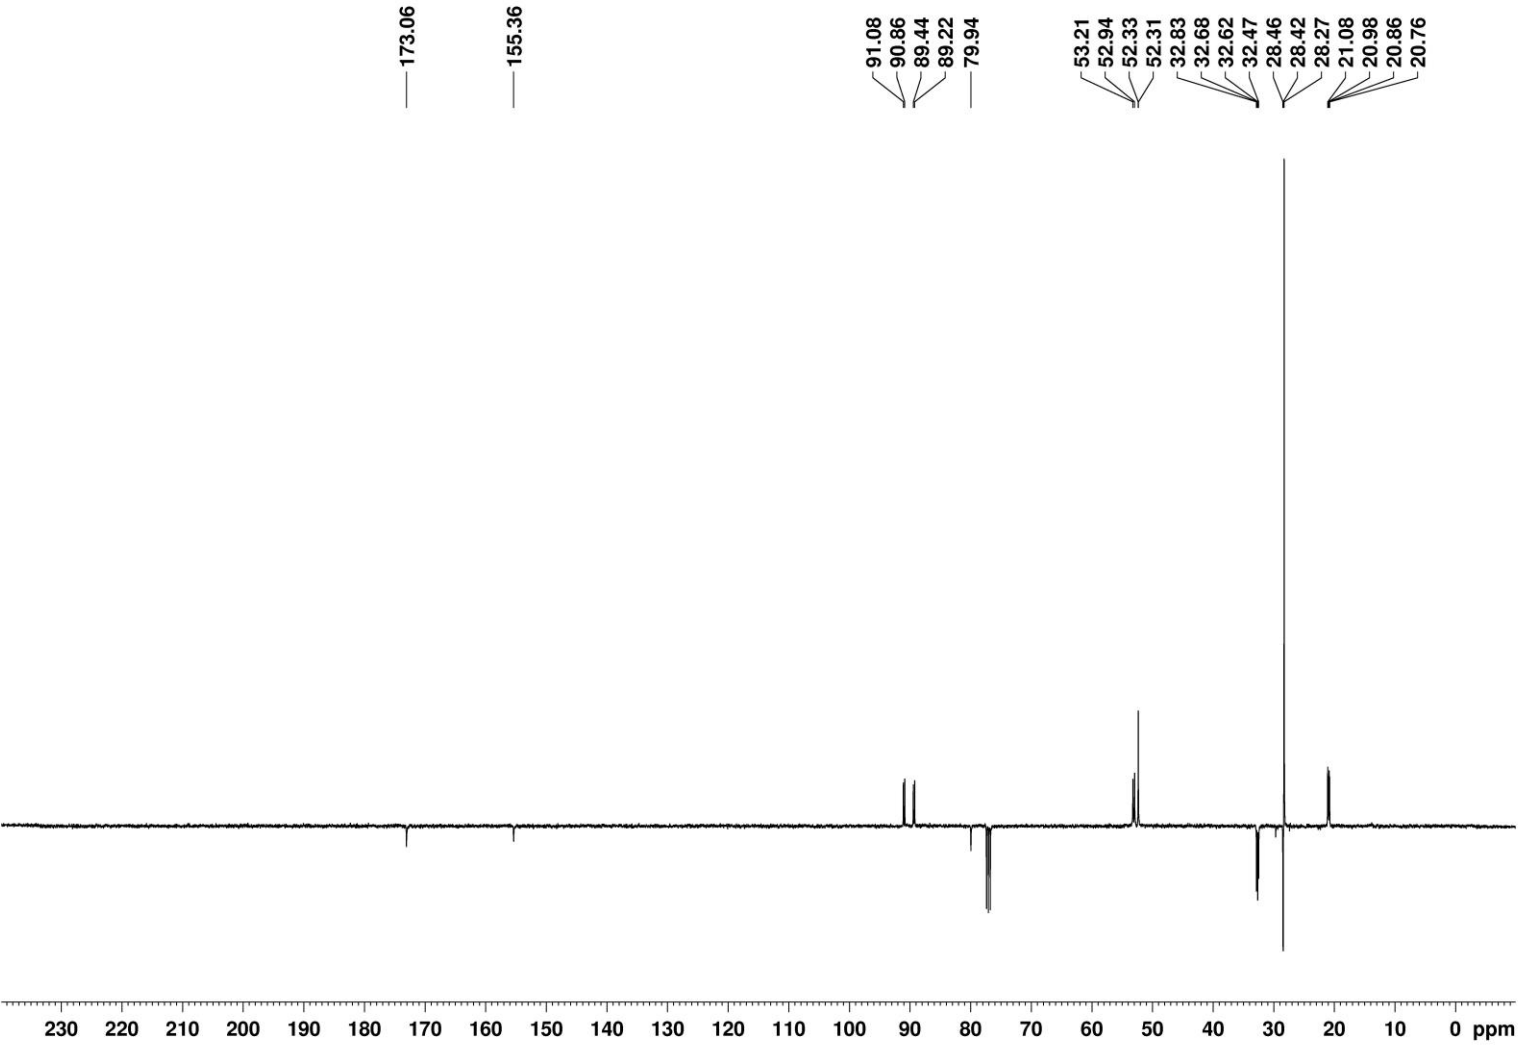

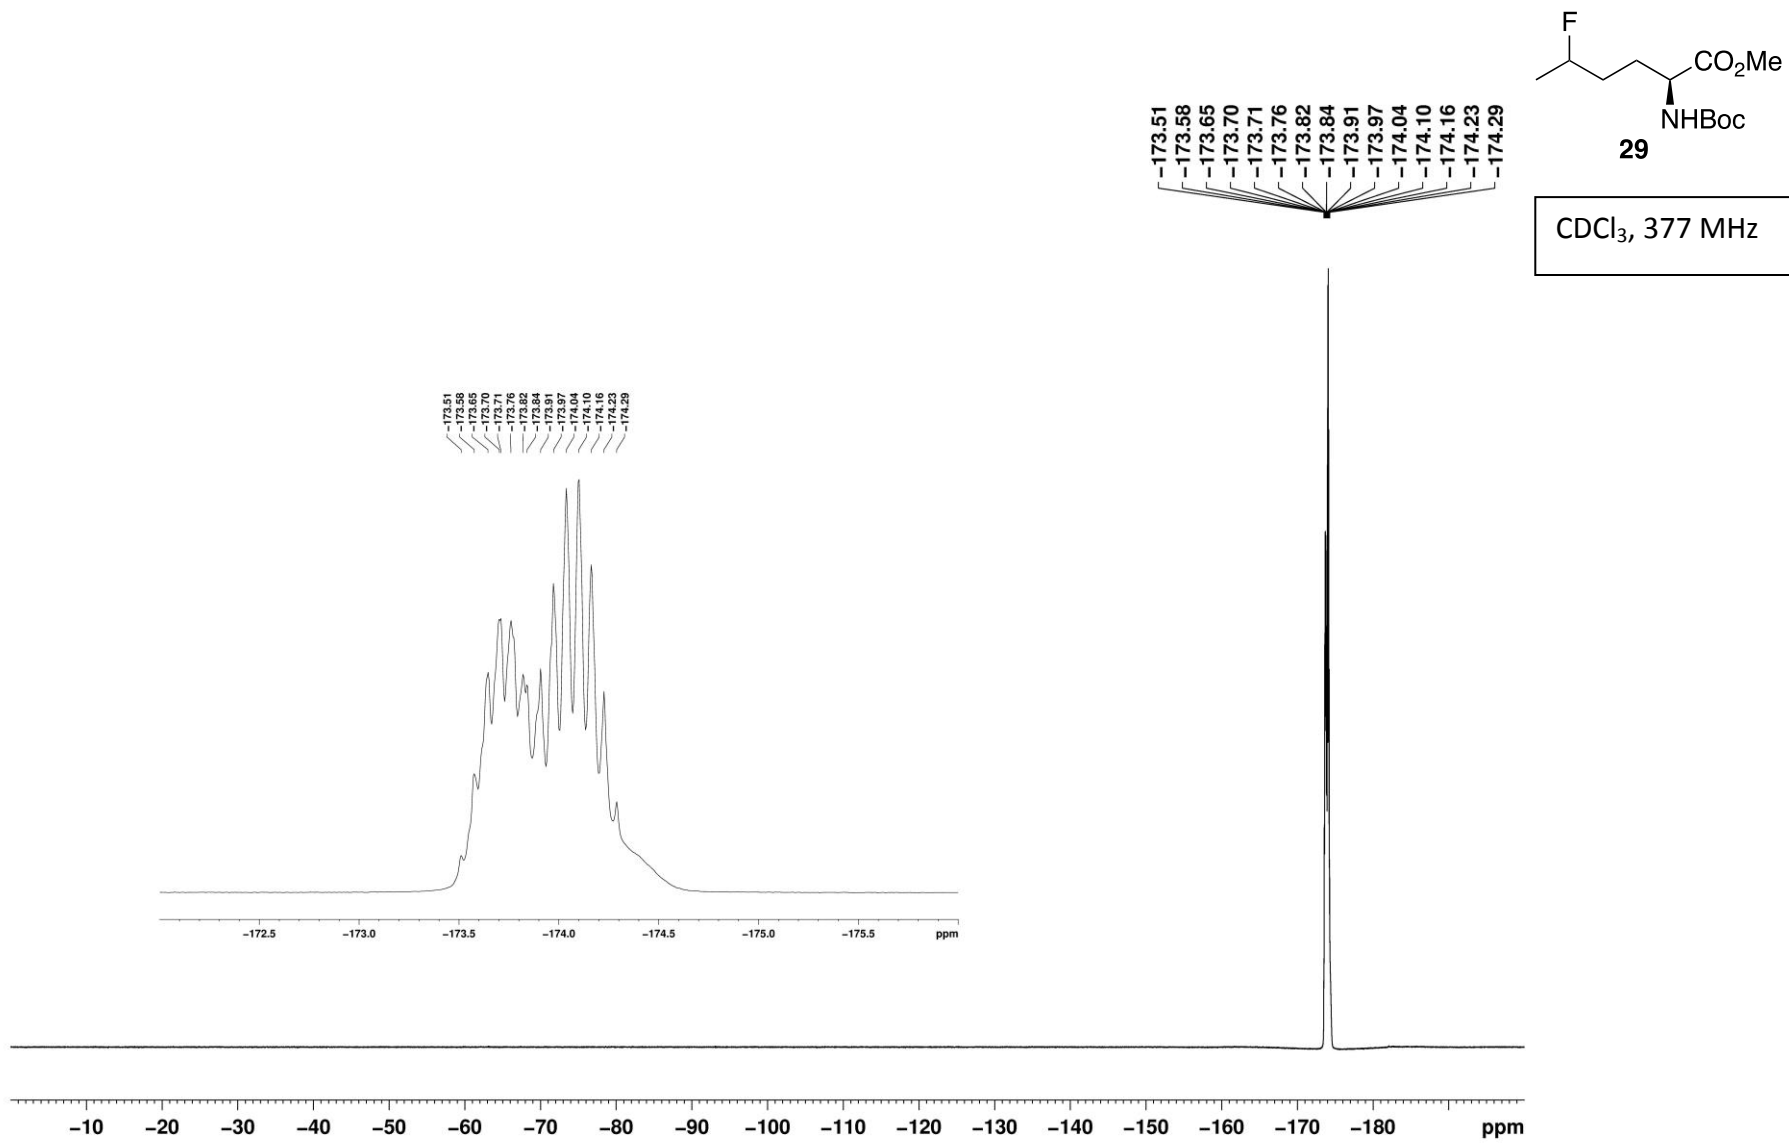



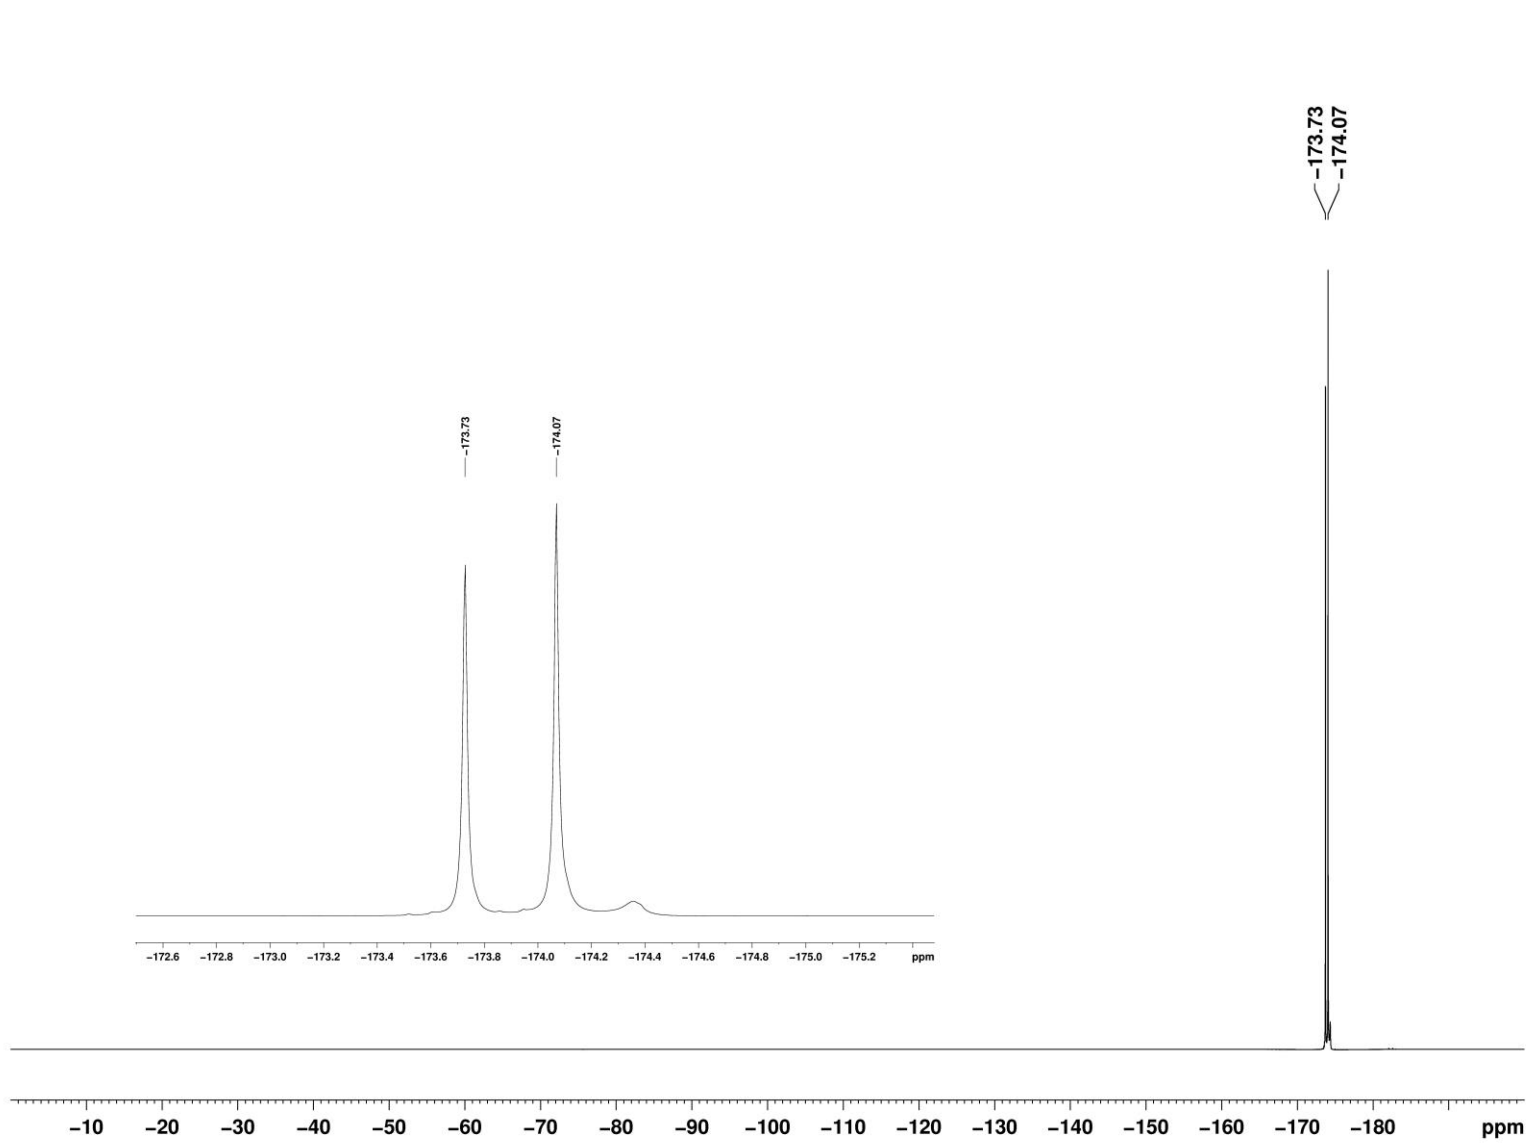

$\text{CDCl}_3, \{^1\text{H}\} 377 \text{ MHz}$

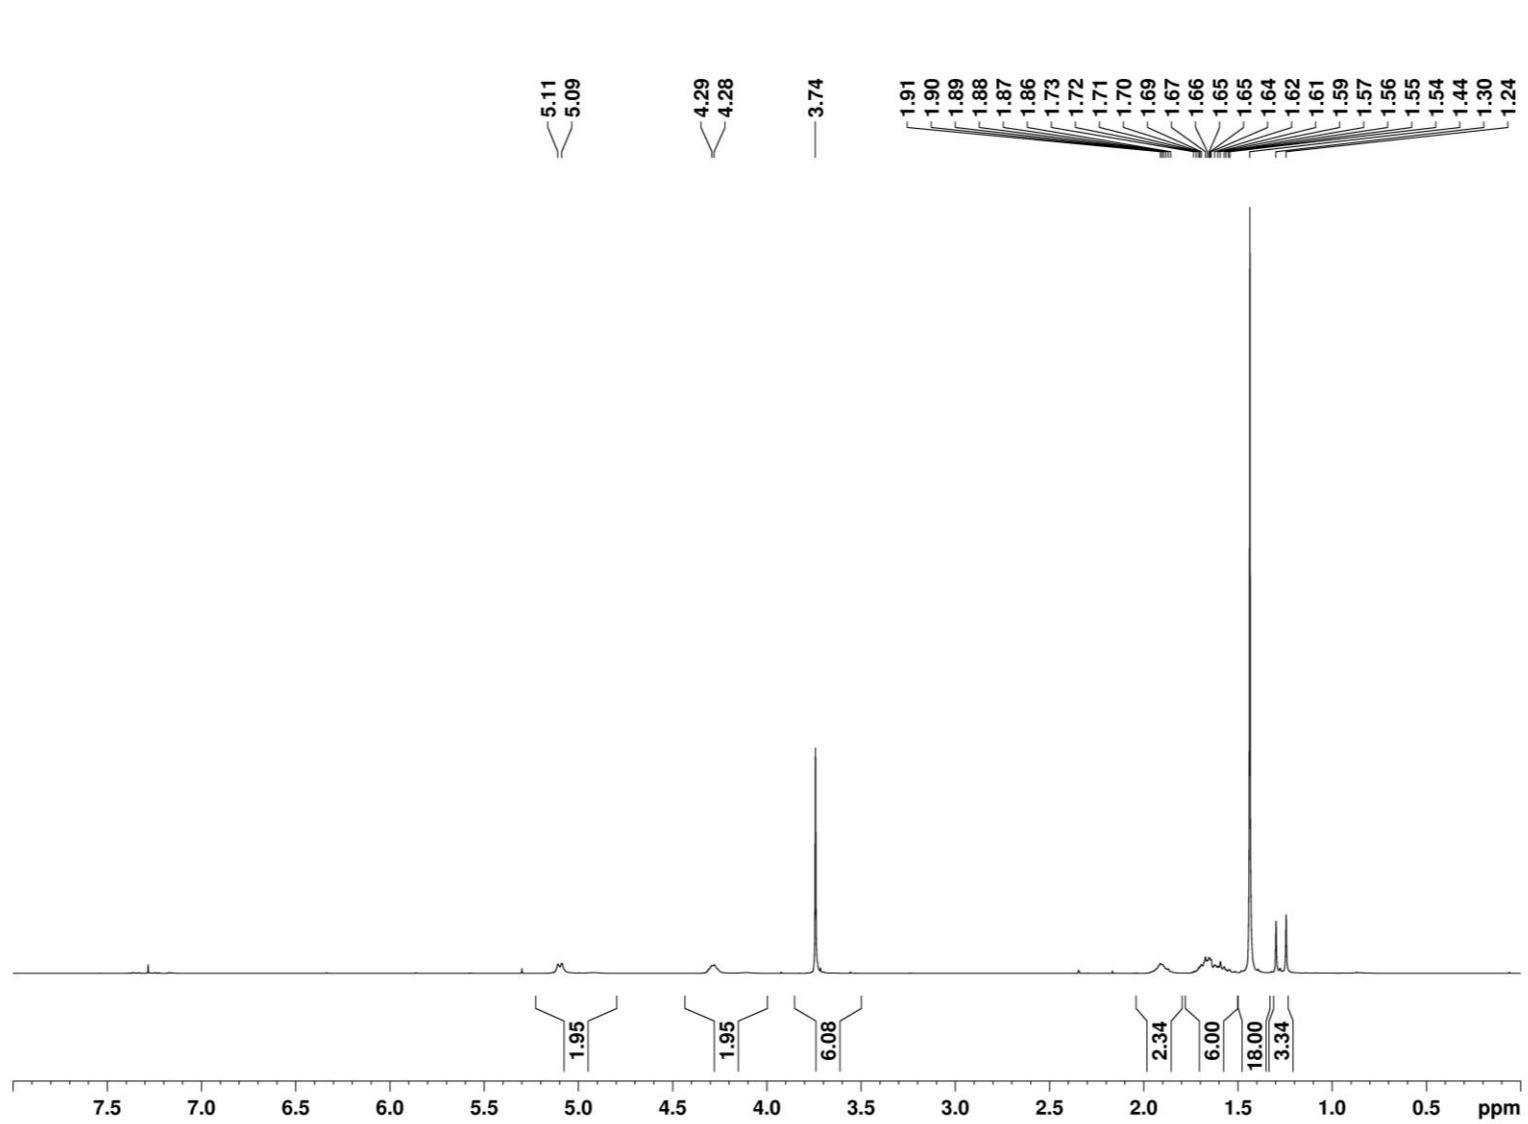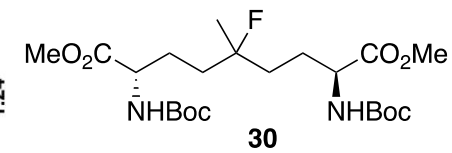

$\text{CDCl}_3$ , 400 MHz

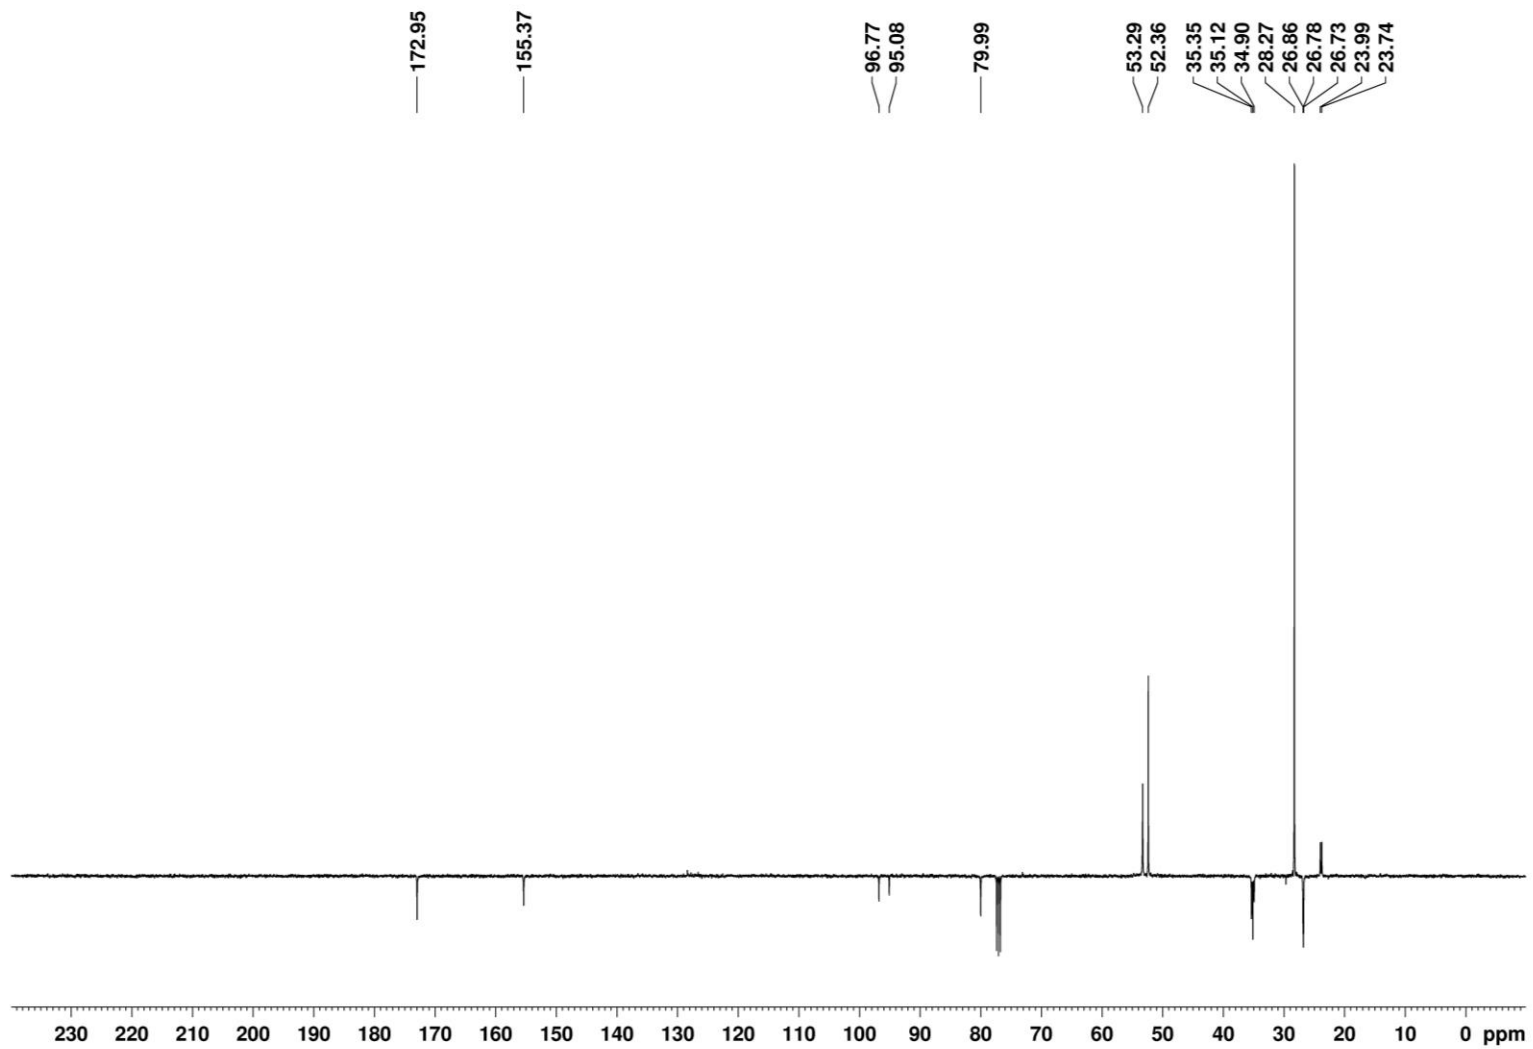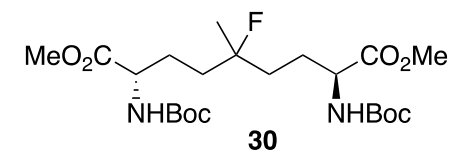

CDCl<sub>3</sub>, 100 MHz

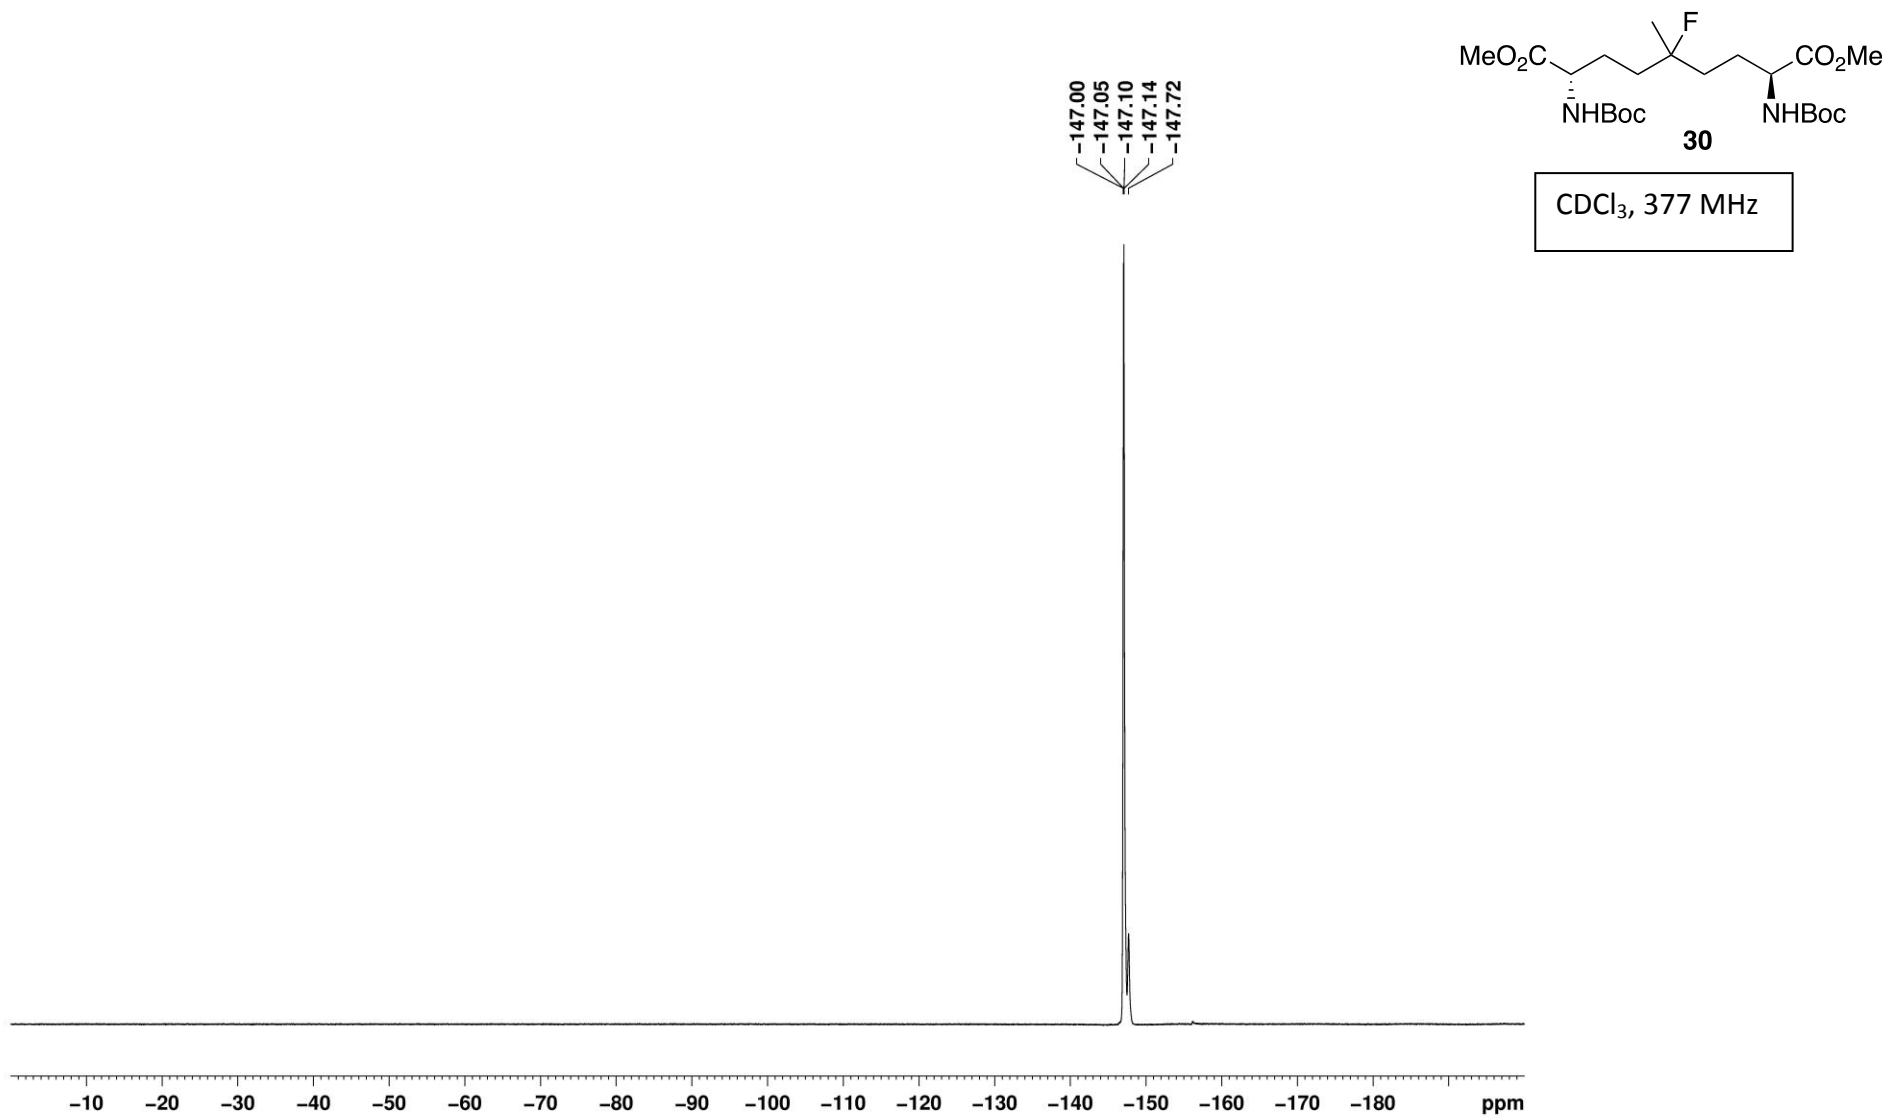

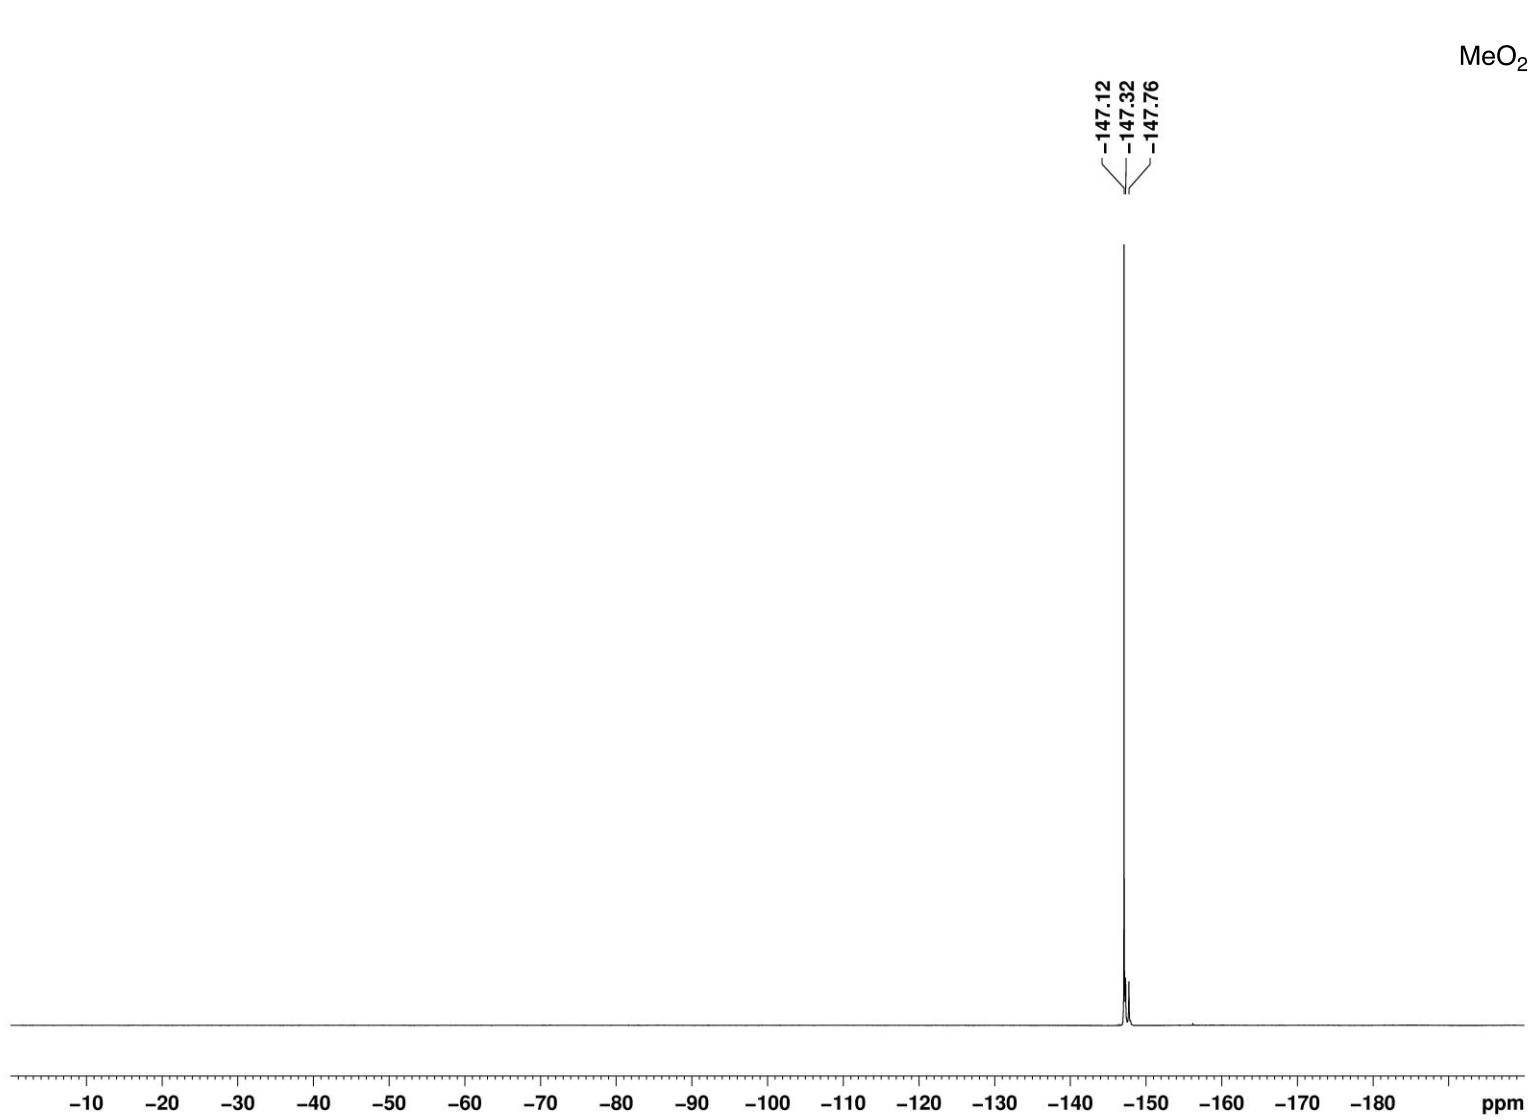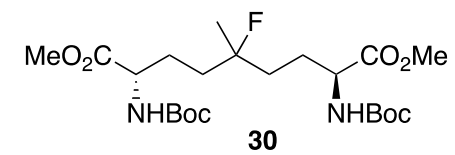

CDCl<sub>3</sub>, {<sup>1</sup>H} 377 MHz

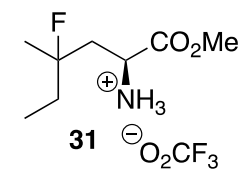

CDCl<sub>3</sub>, 400 MHz

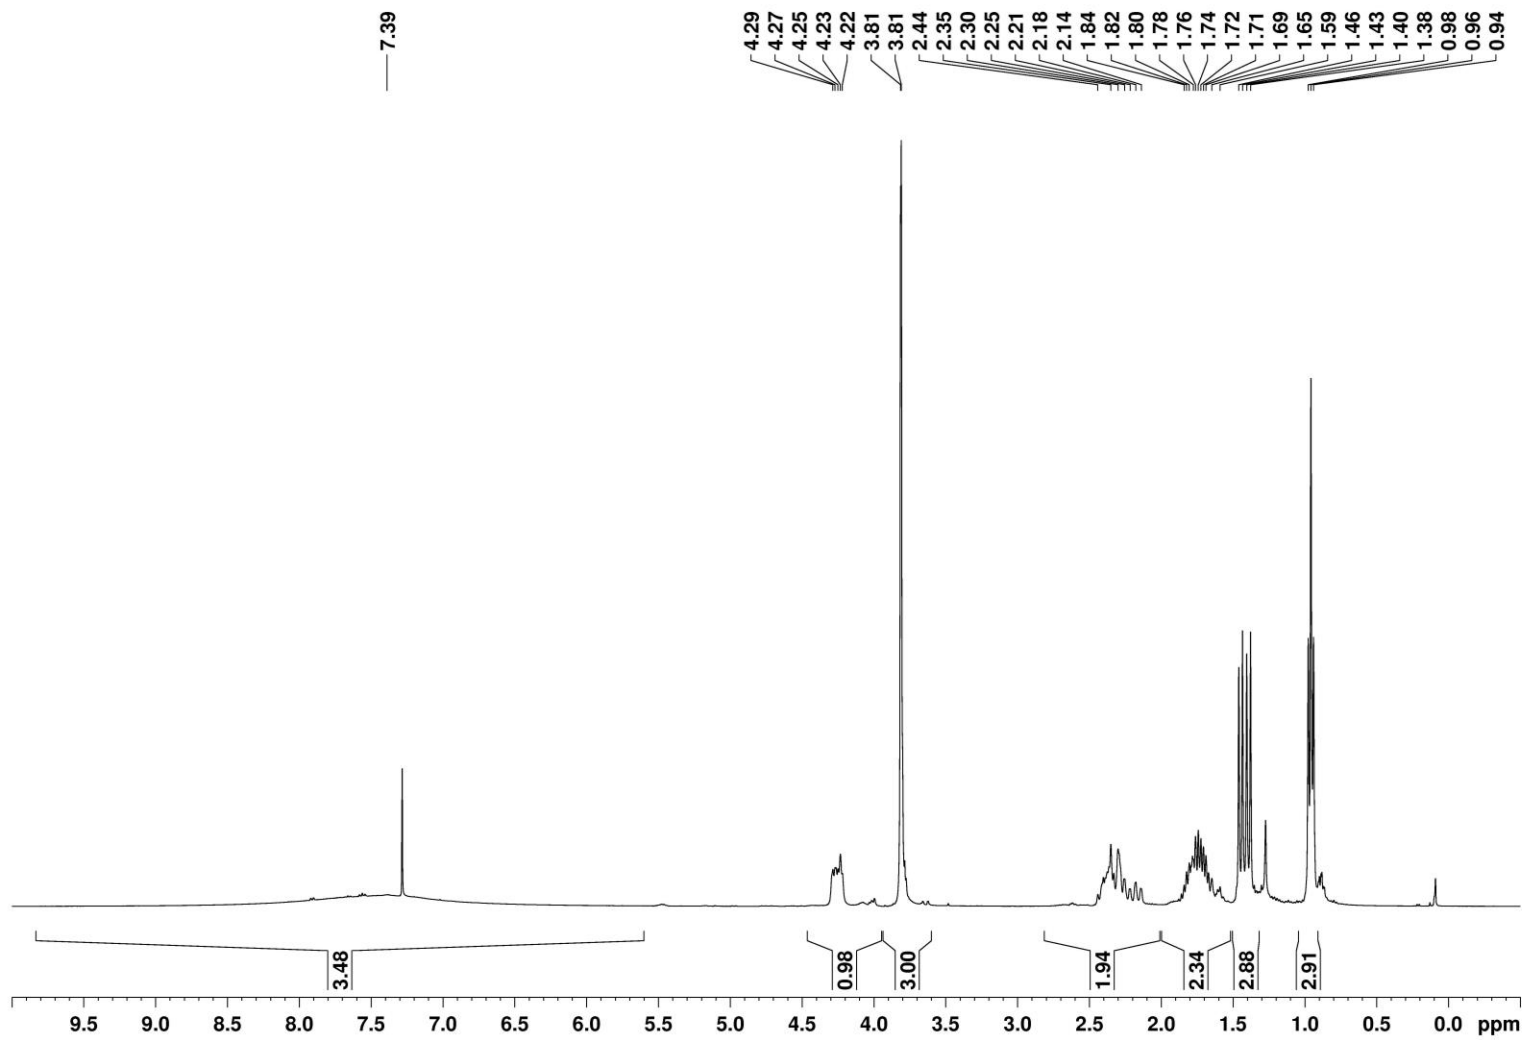

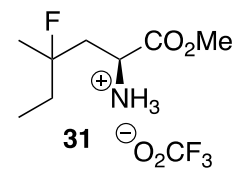

CDCl<sub>3</sub>, 100 MHz

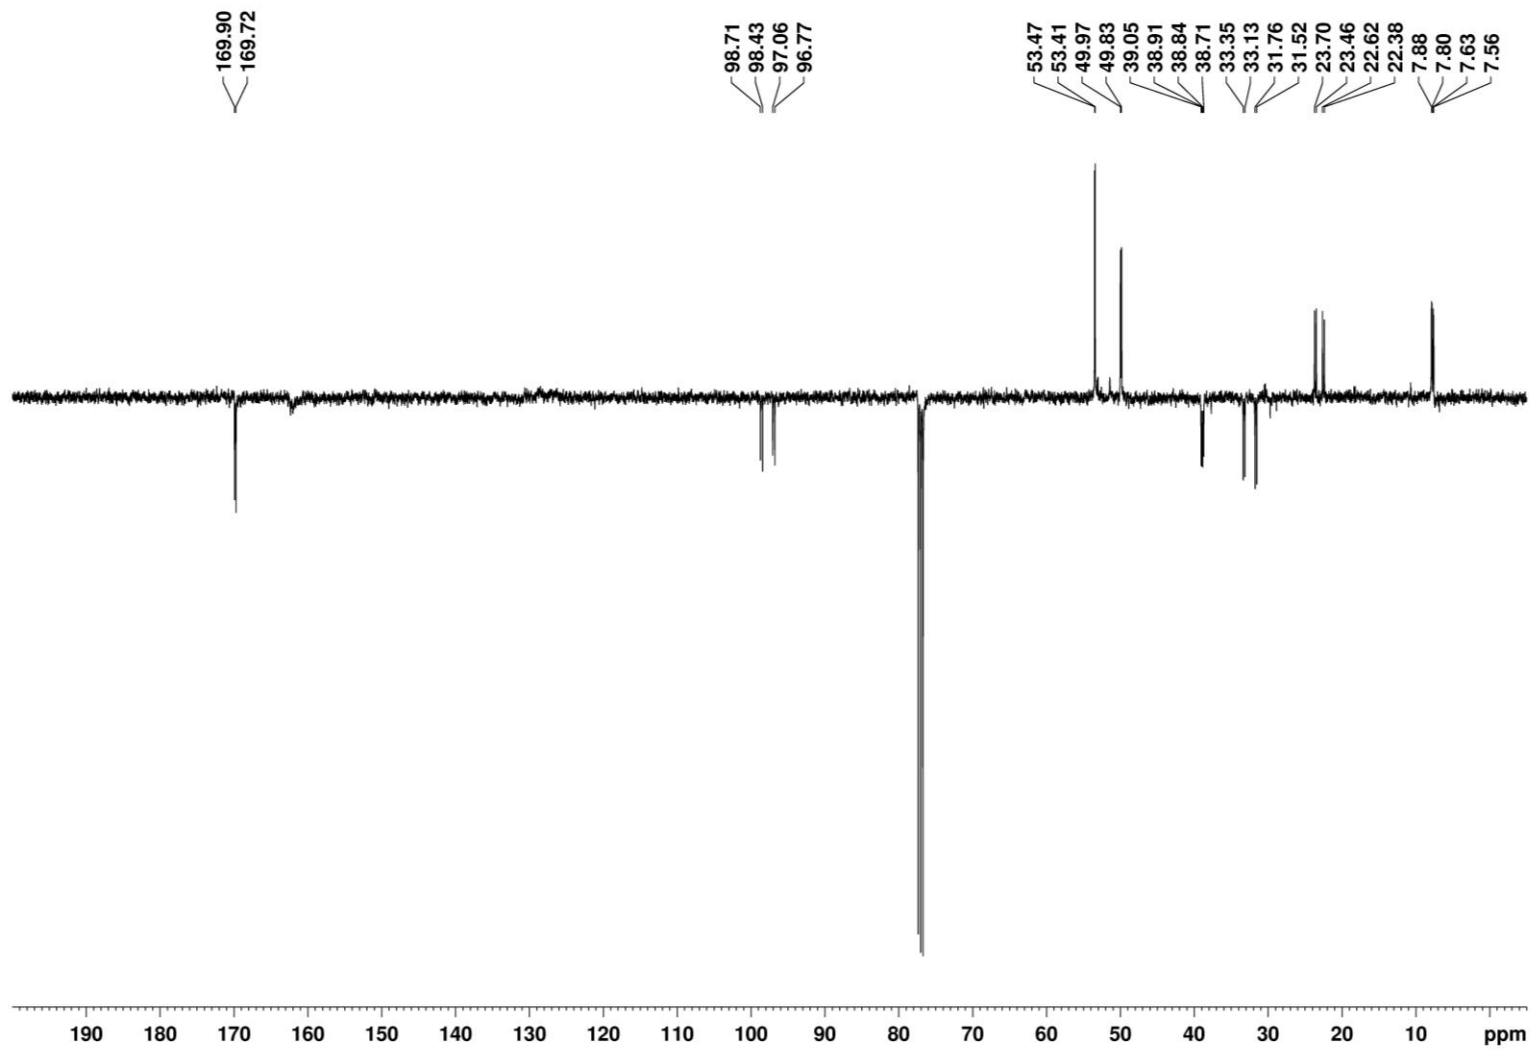

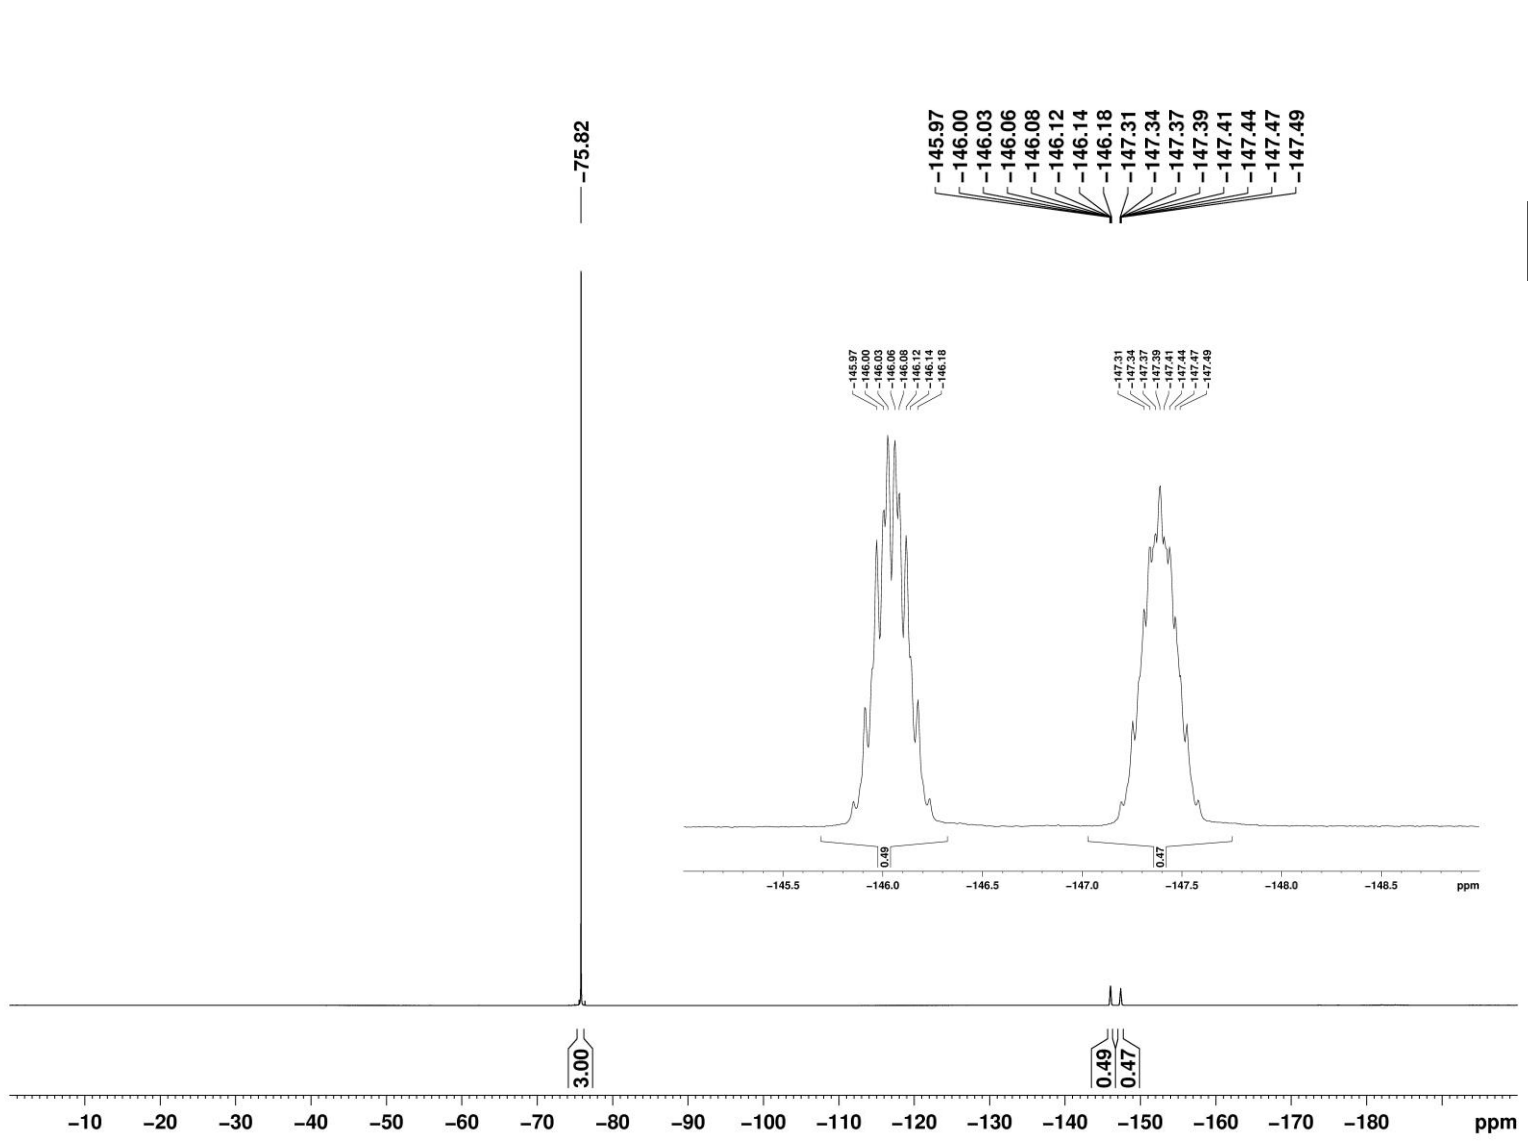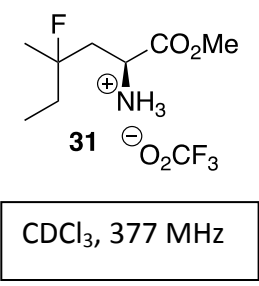



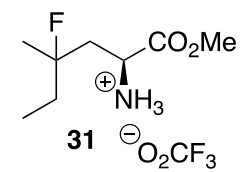

CDCl<sub>3</sub>, {<sup>1</sup>H} 377 MHz

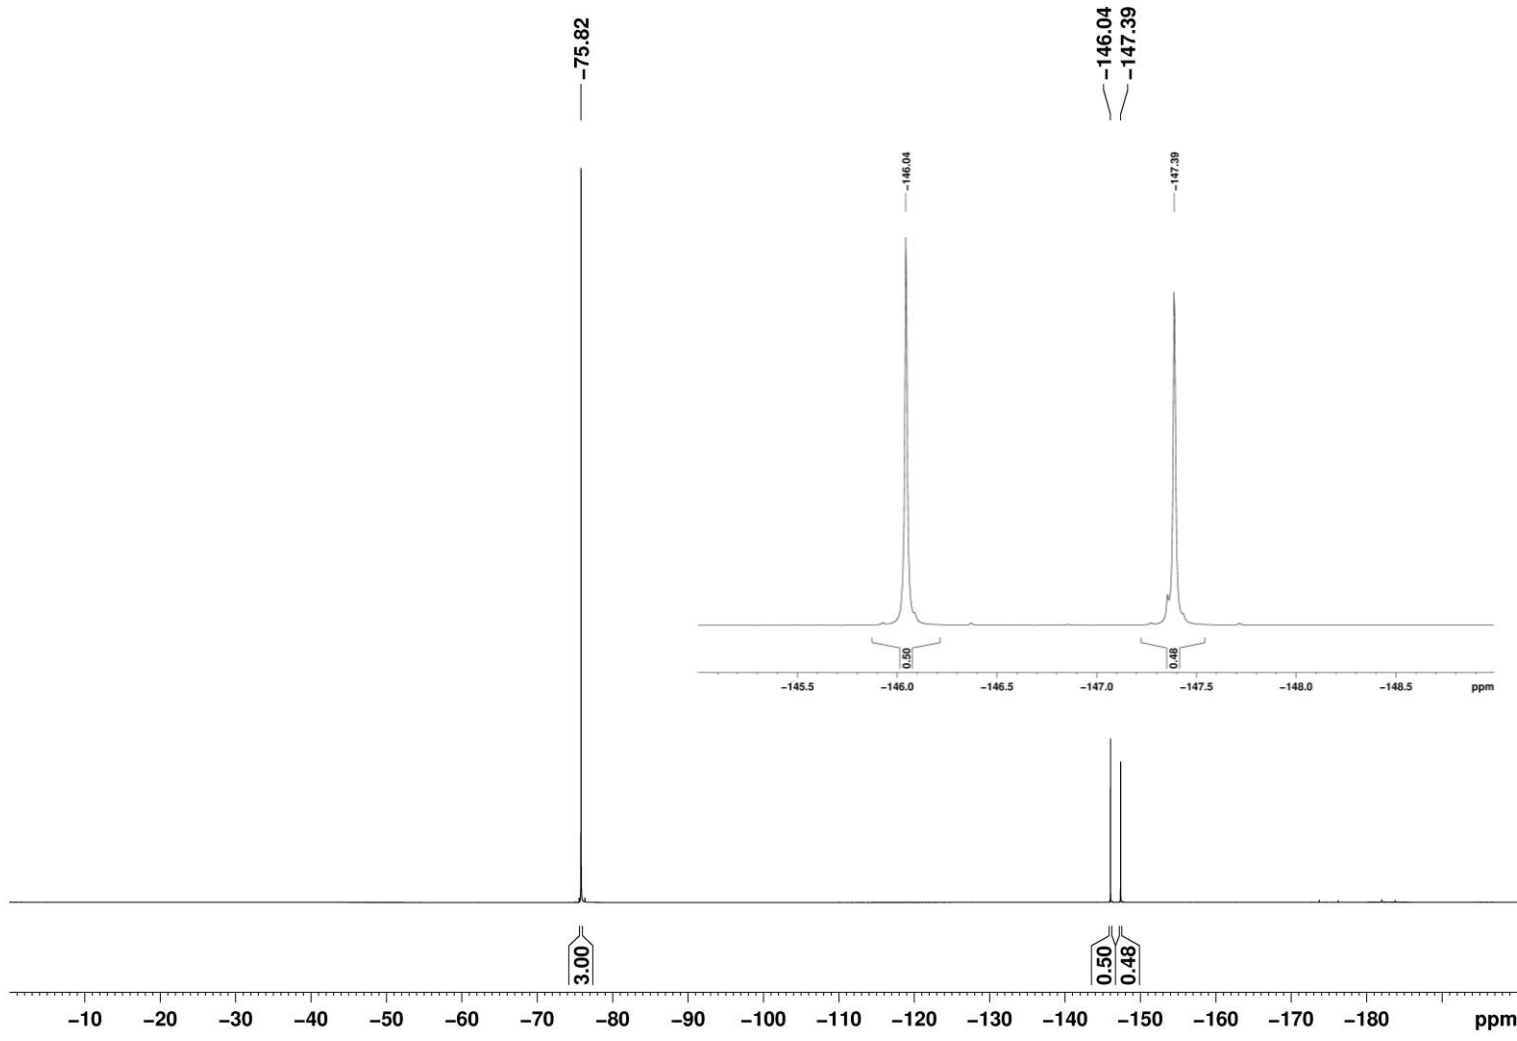

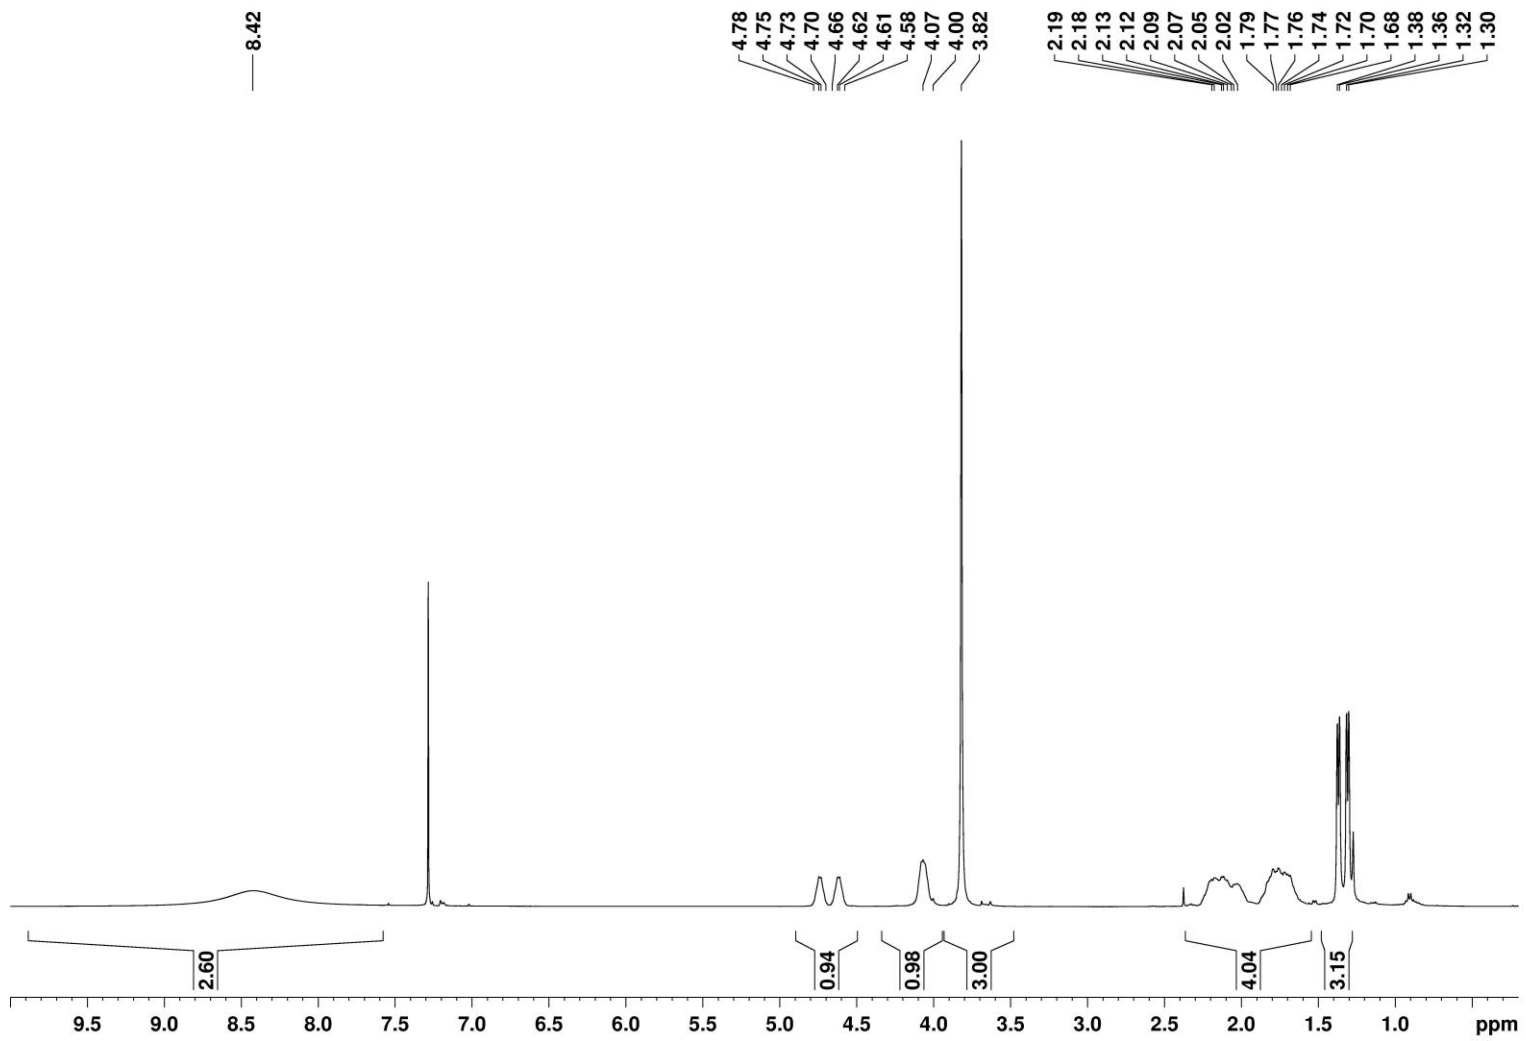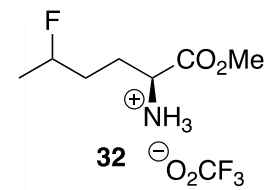

CDCl<sub>3</sub>, 400 MHz

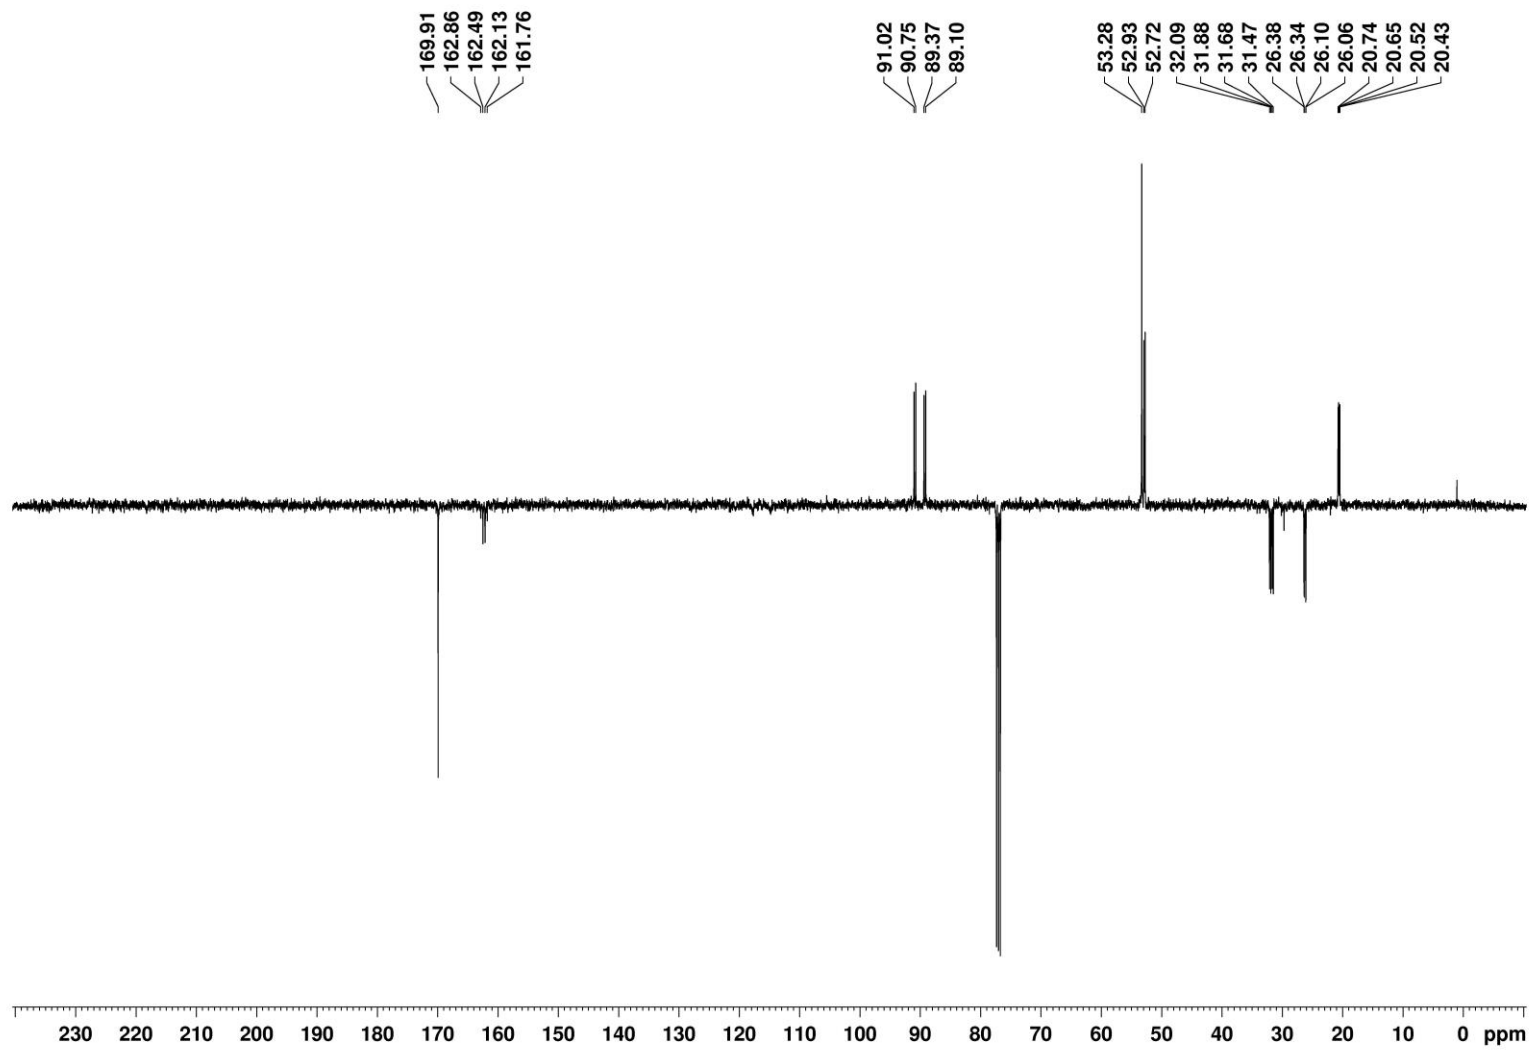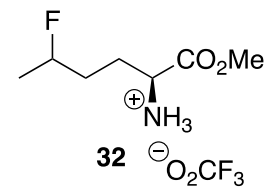

CDCl<sub>3</sub>, 100 MHz

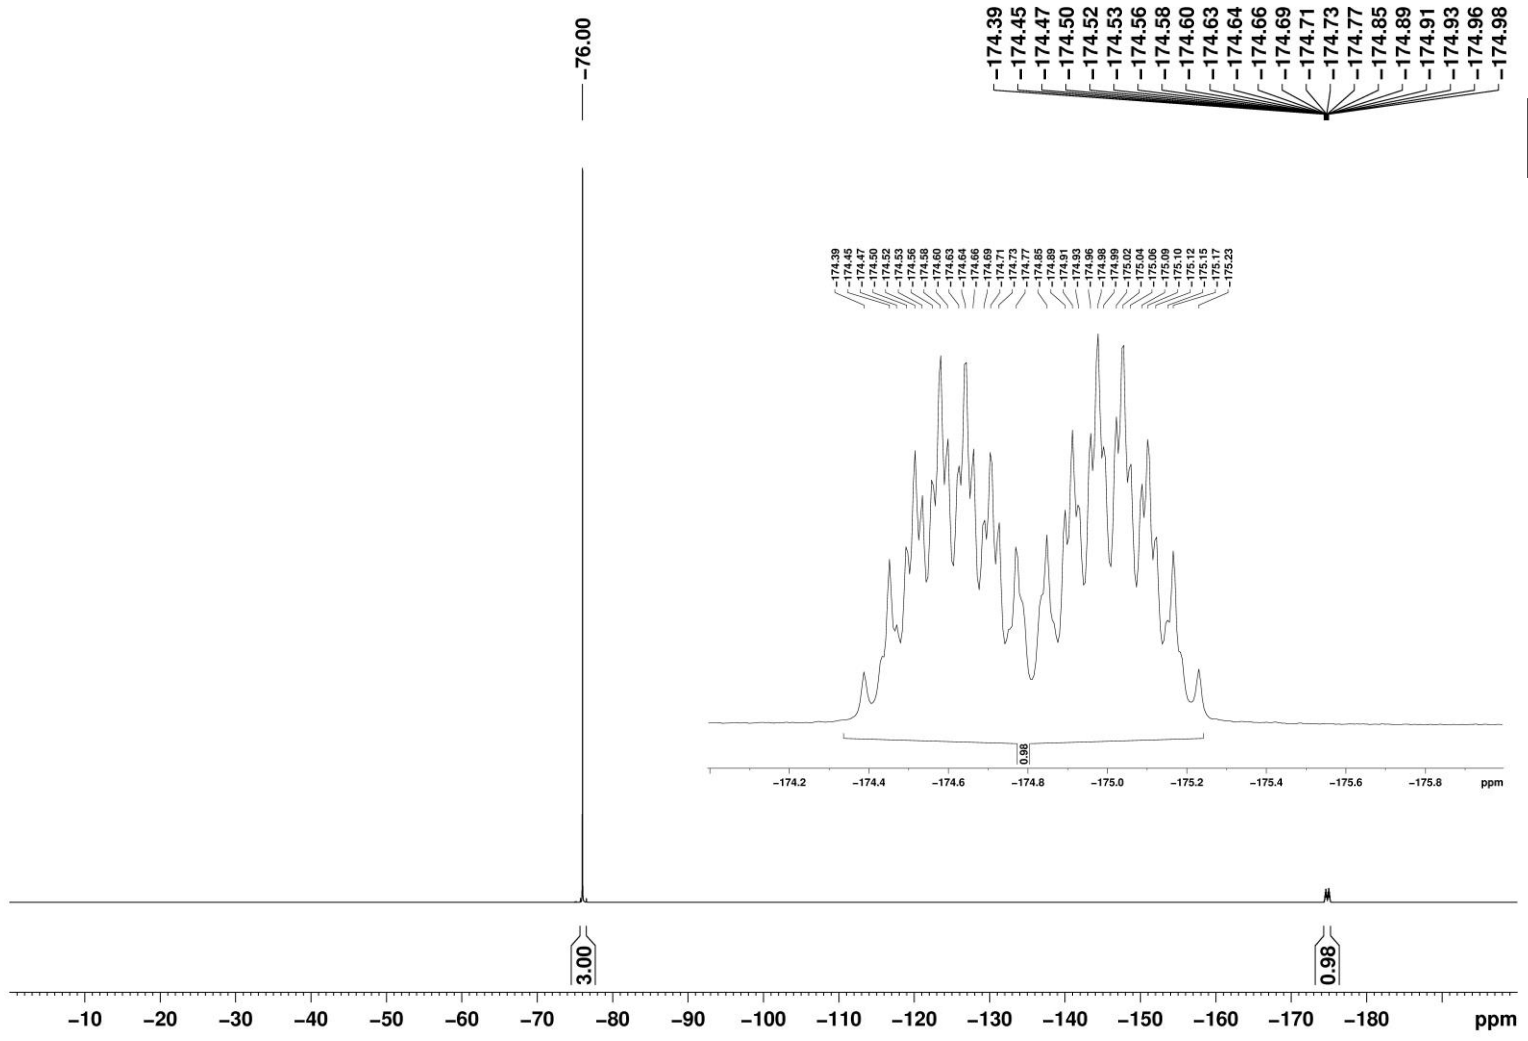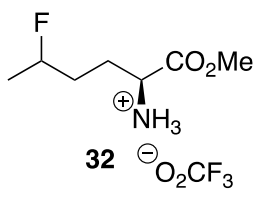

CDCl<sub>3</sub>, 377 MHz

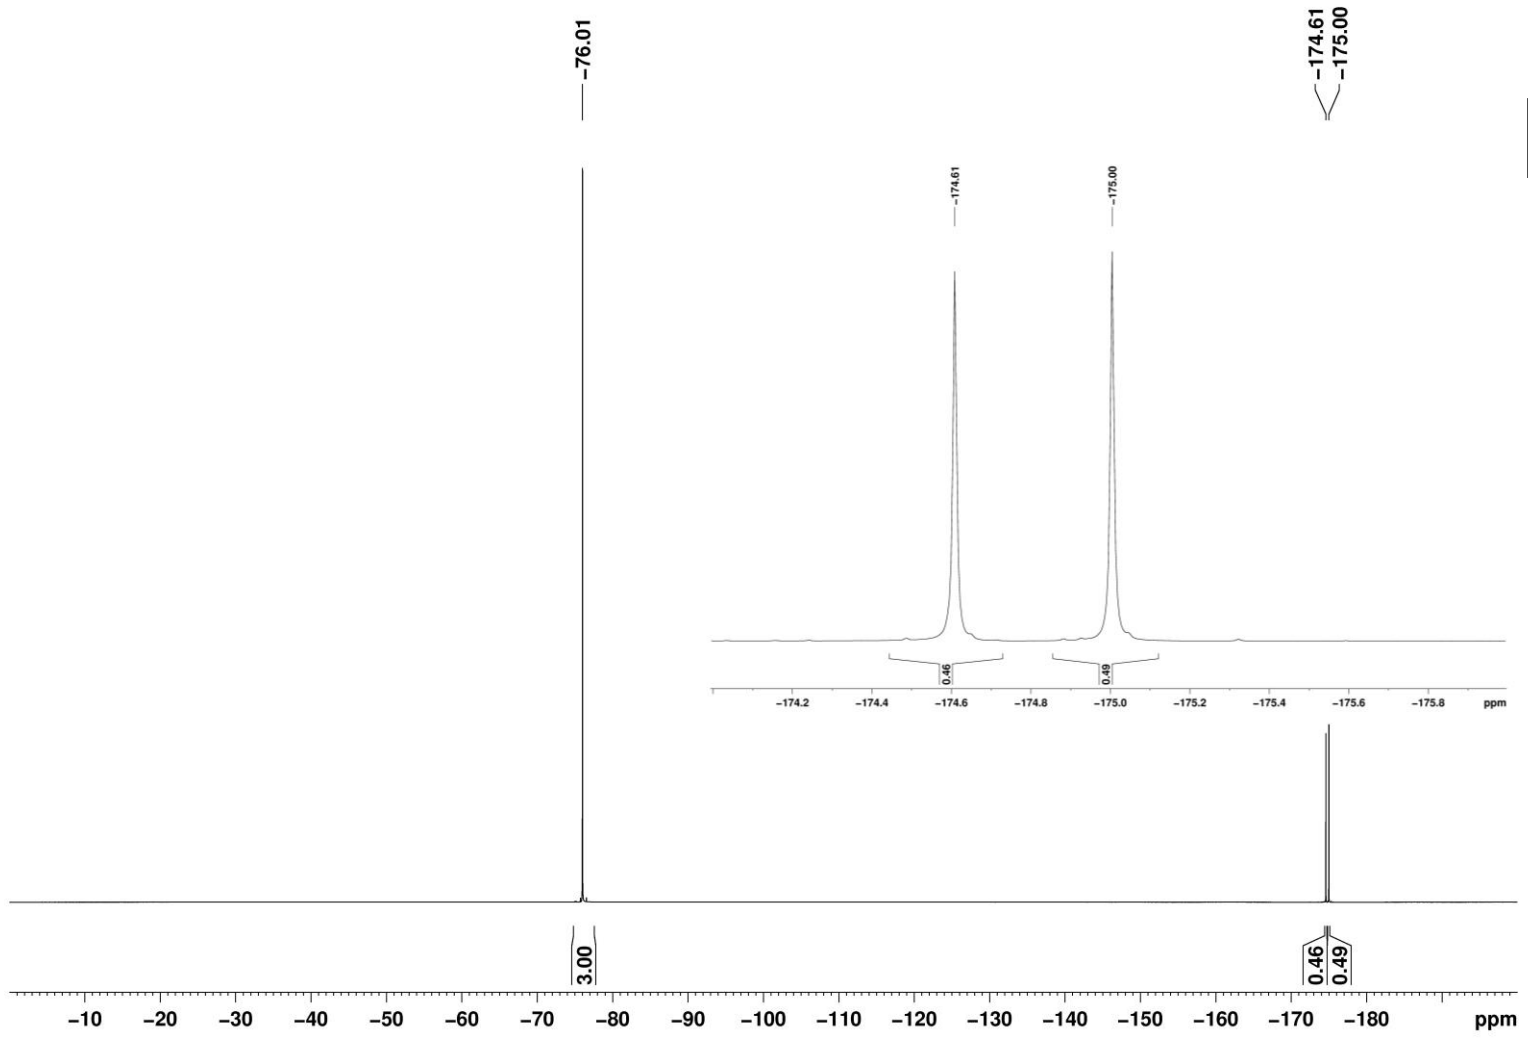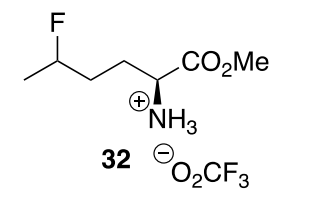

CDCl<sub>3</sub>, {<sup>1</sup>H} 377 MHz

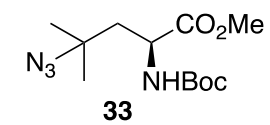

CDCl<sub>3</sub>, 400 MHz

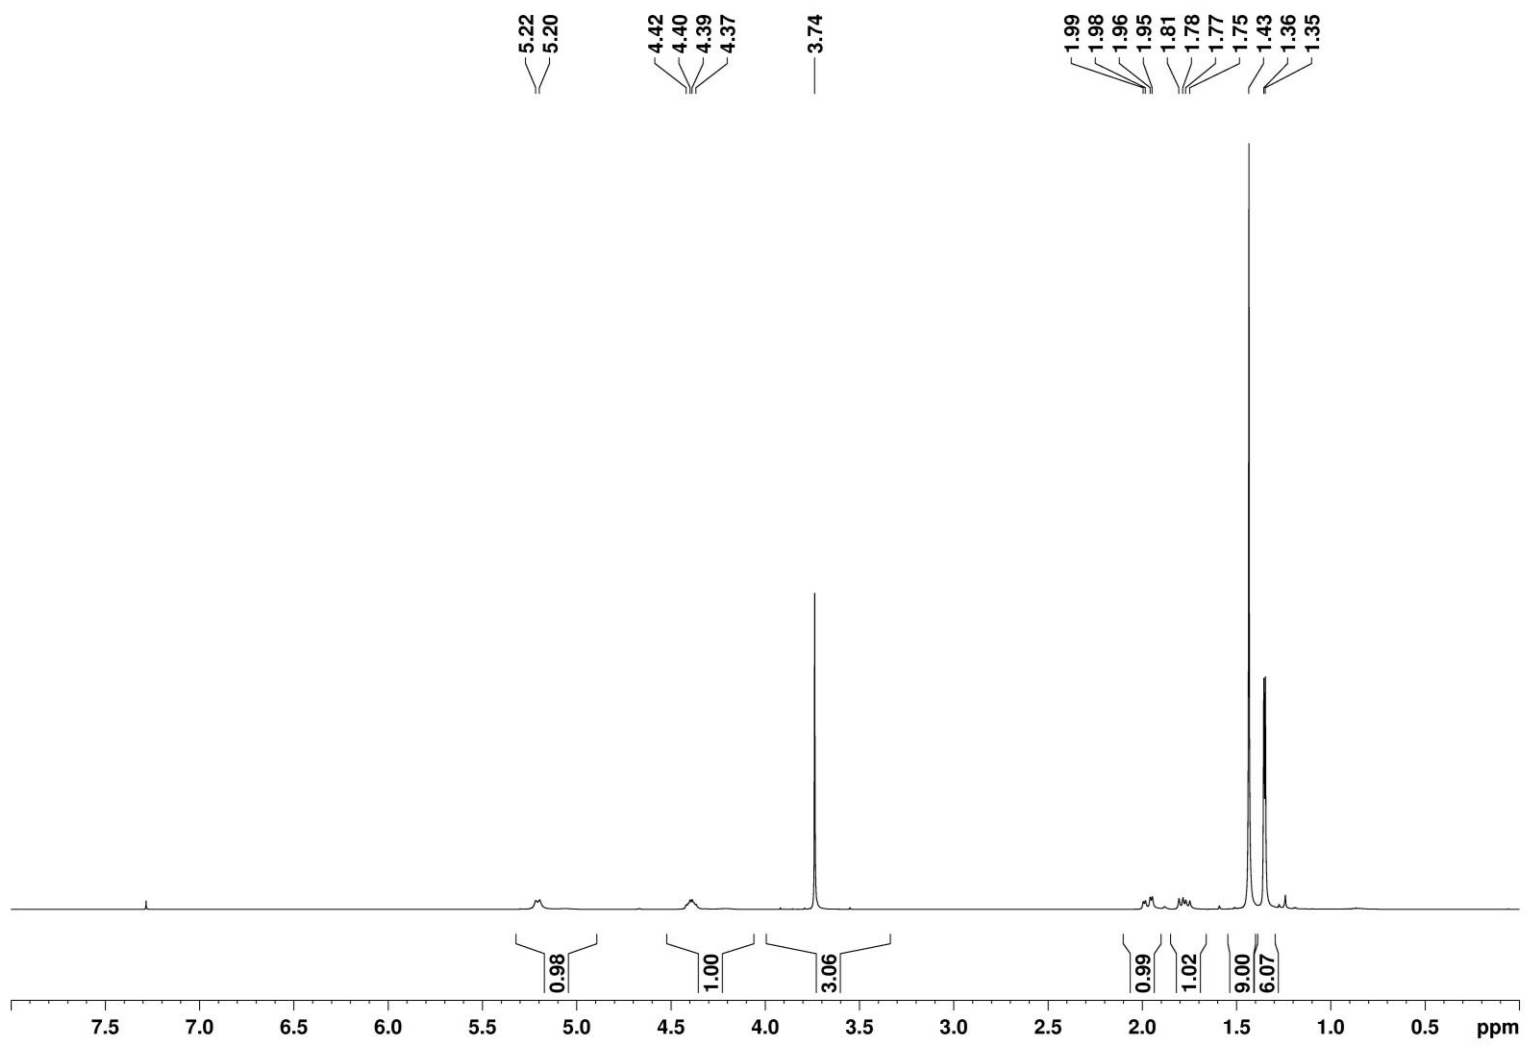

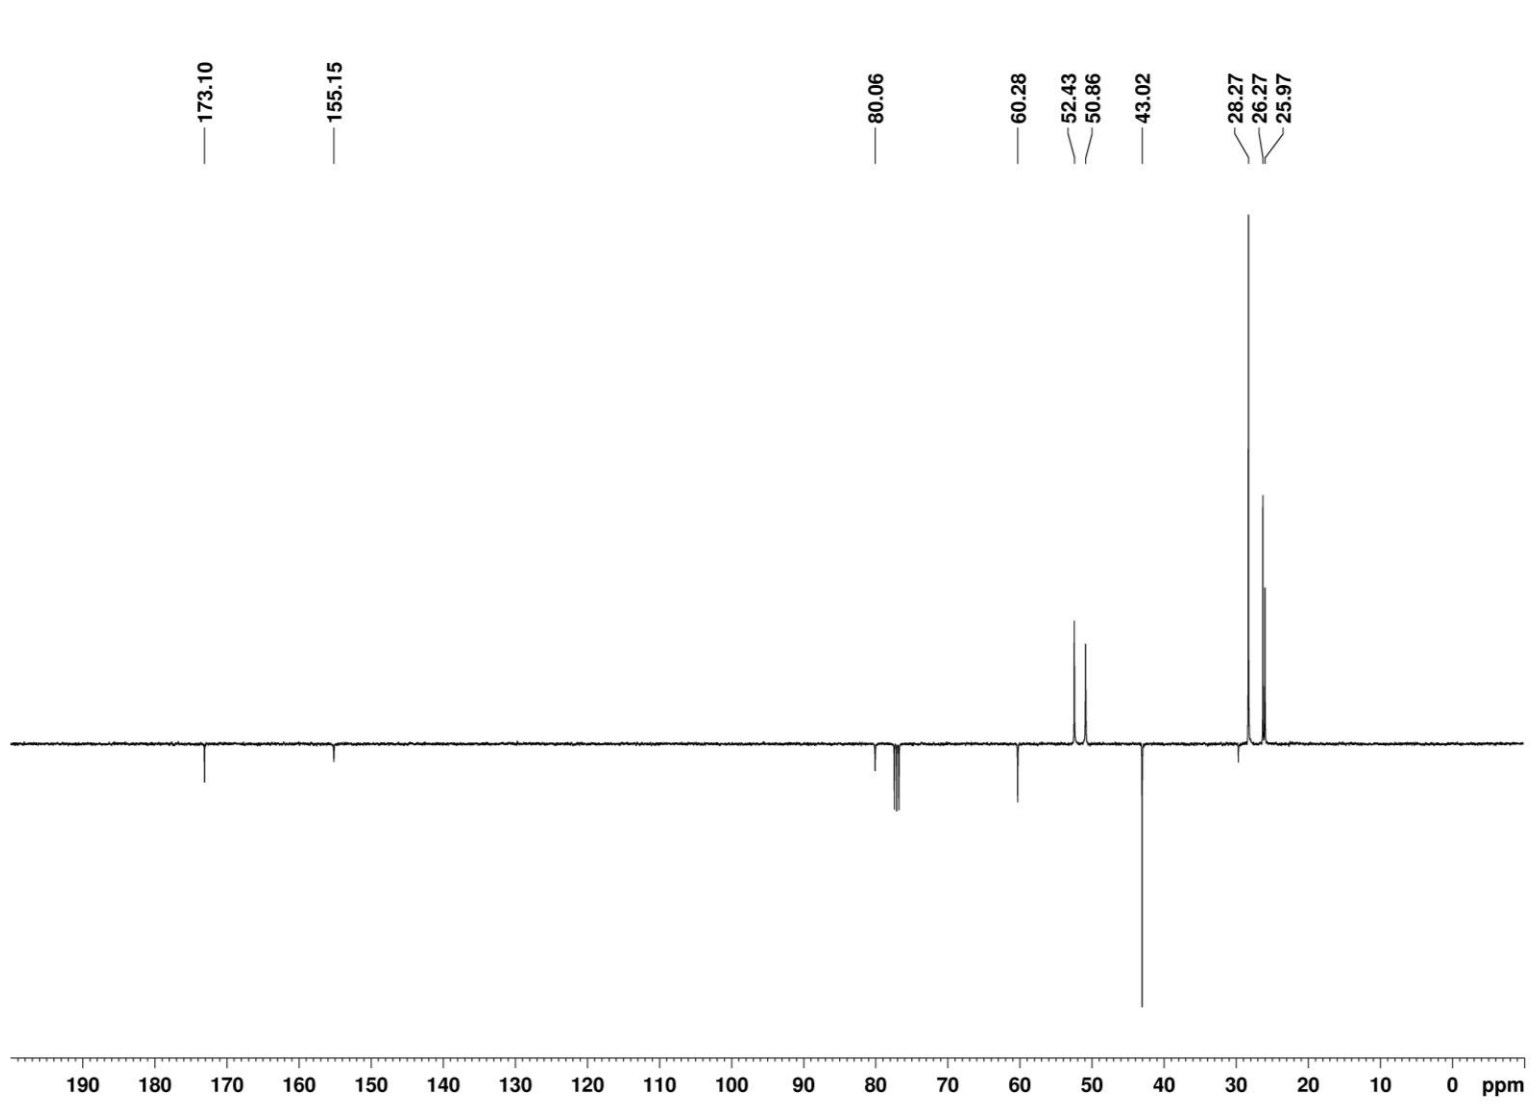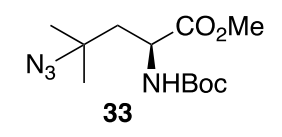

CDCl<sub>3</sub>, 100 MHz

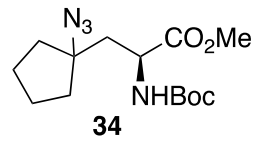

CDCl<sub>3</sub>, 400 MHz

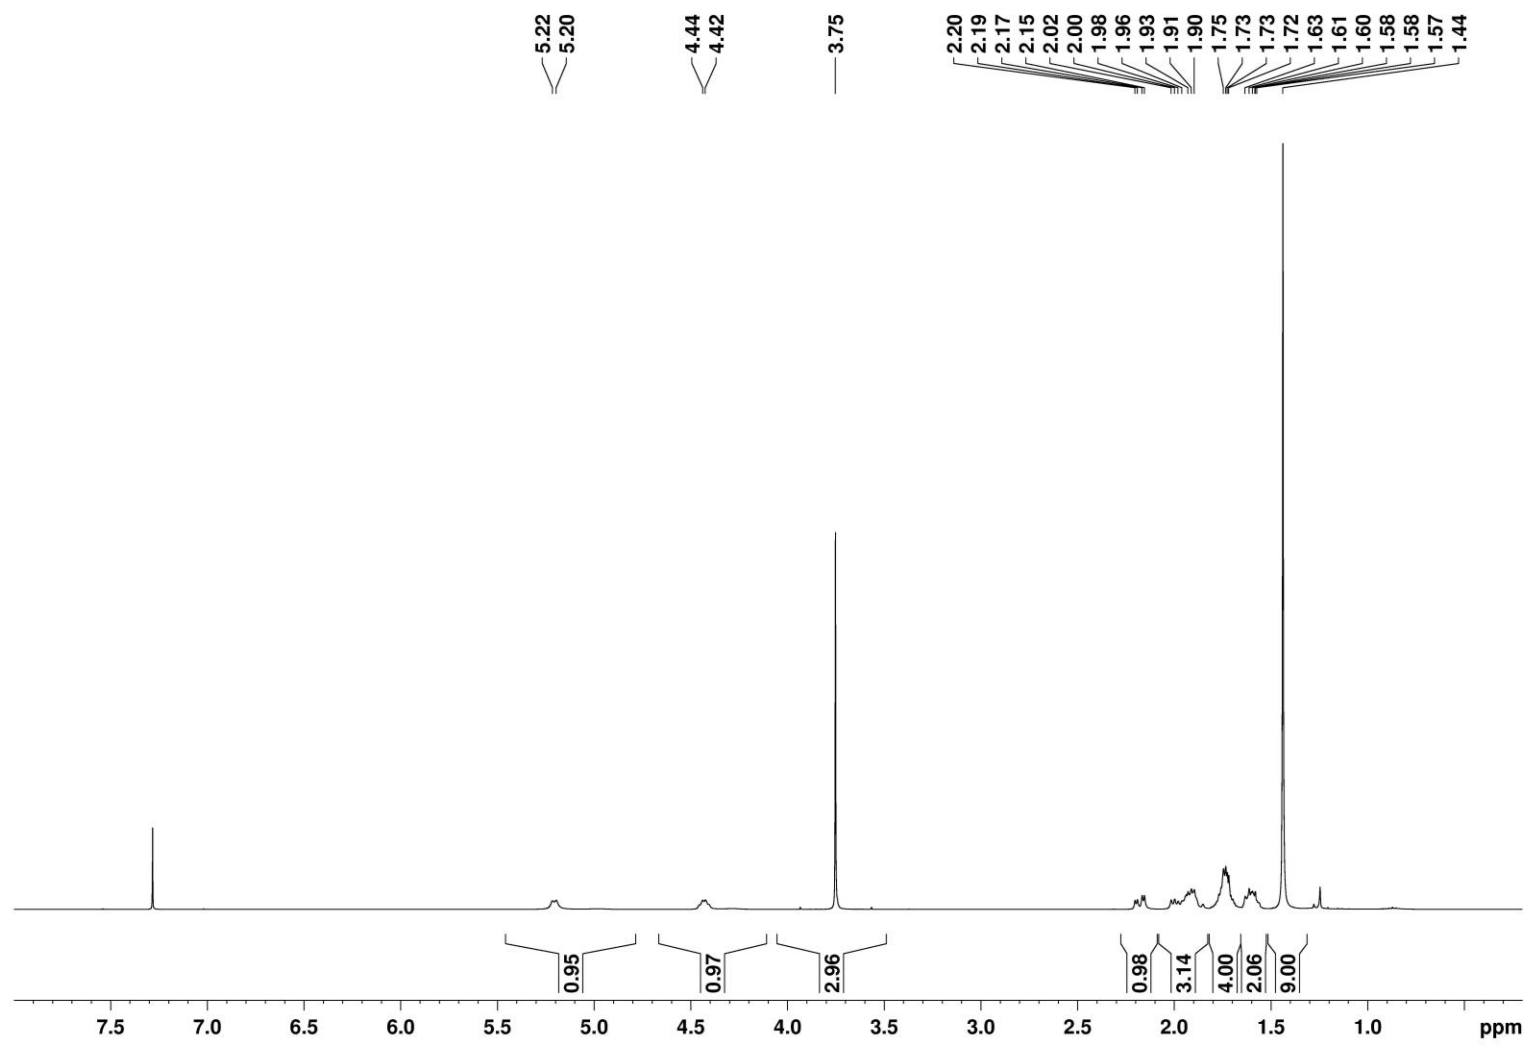



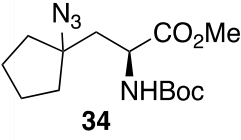

CDCl<sub>3</sub>, 100 MHz

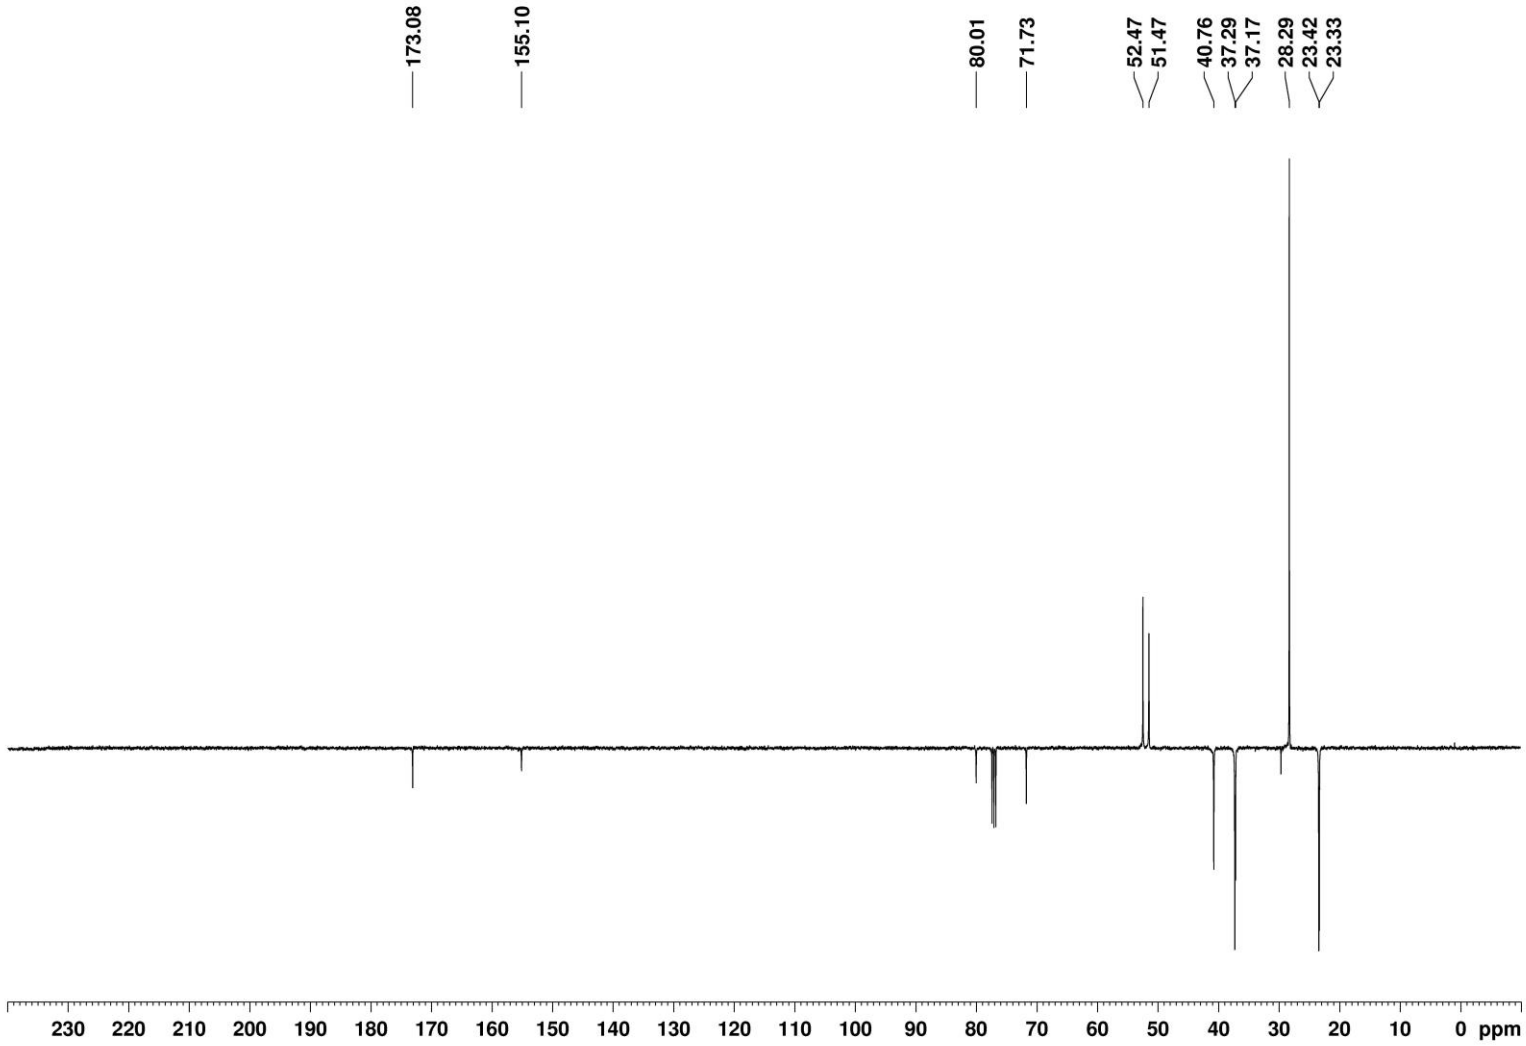

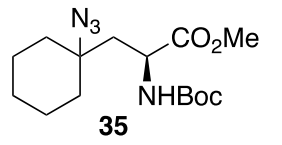

CDCl<sub>3</sub>, 400 MHz

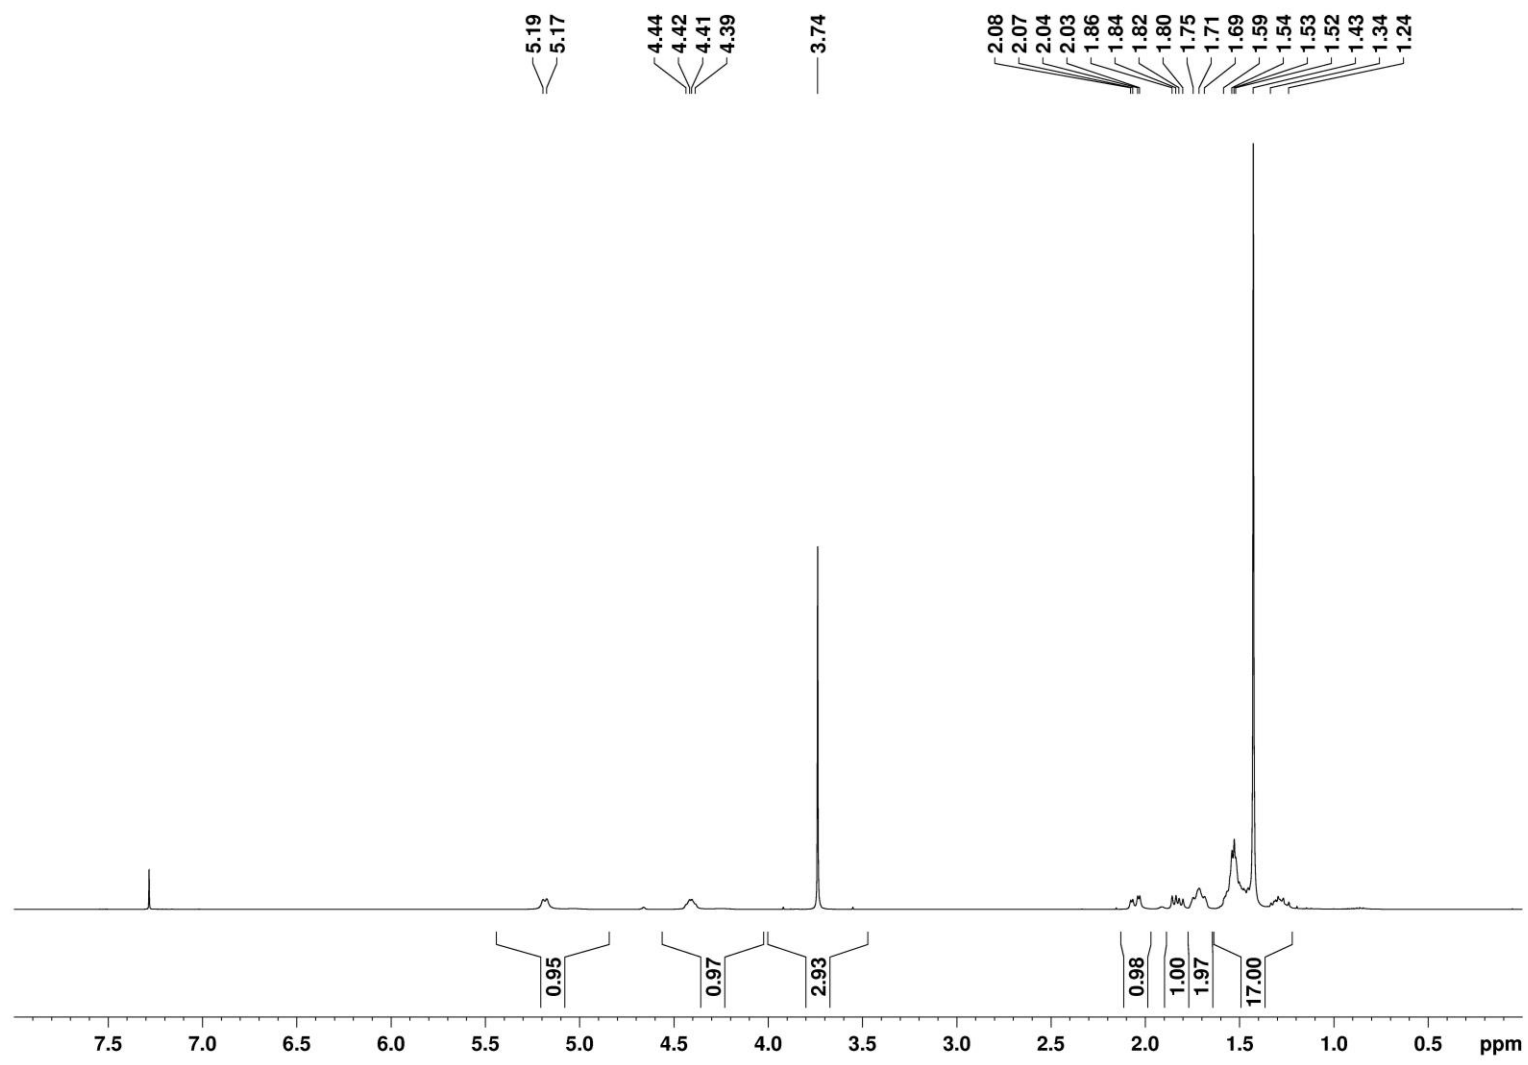

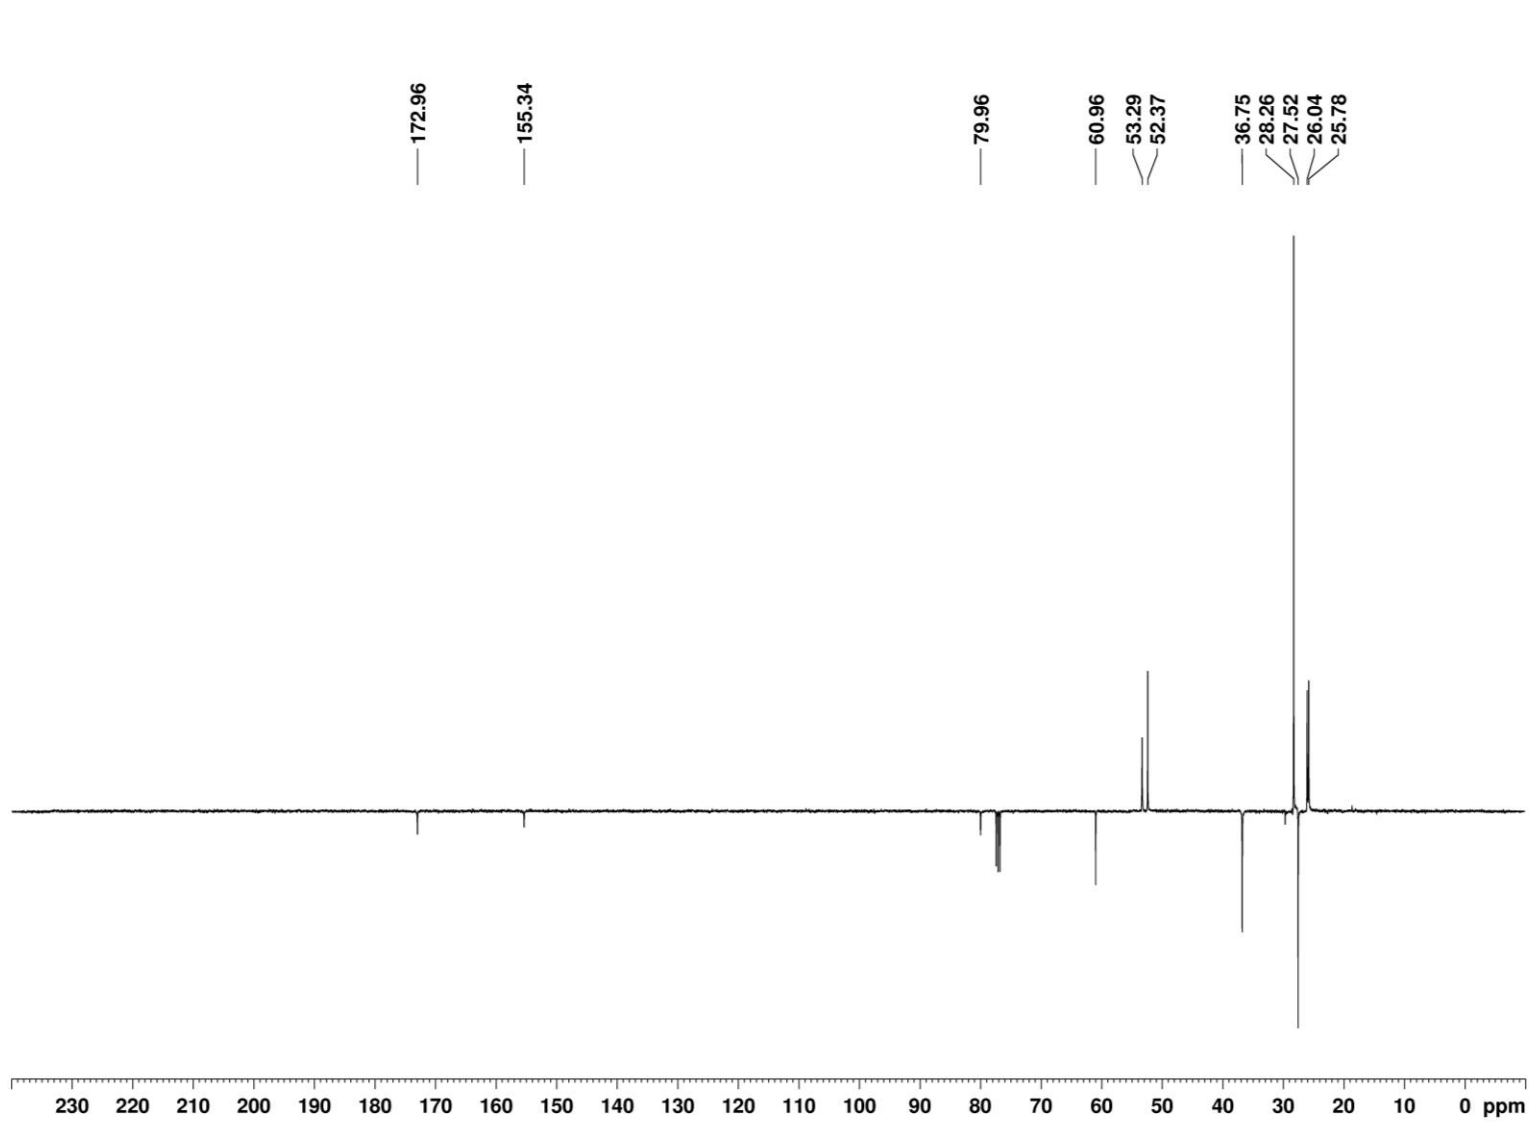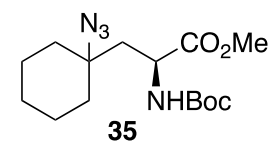

CDCl<sub>3</sub>, 100 MHz

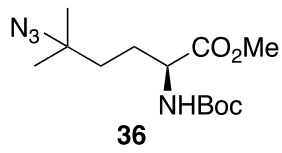

CDCl<sub>3</sub>, 400 MHz

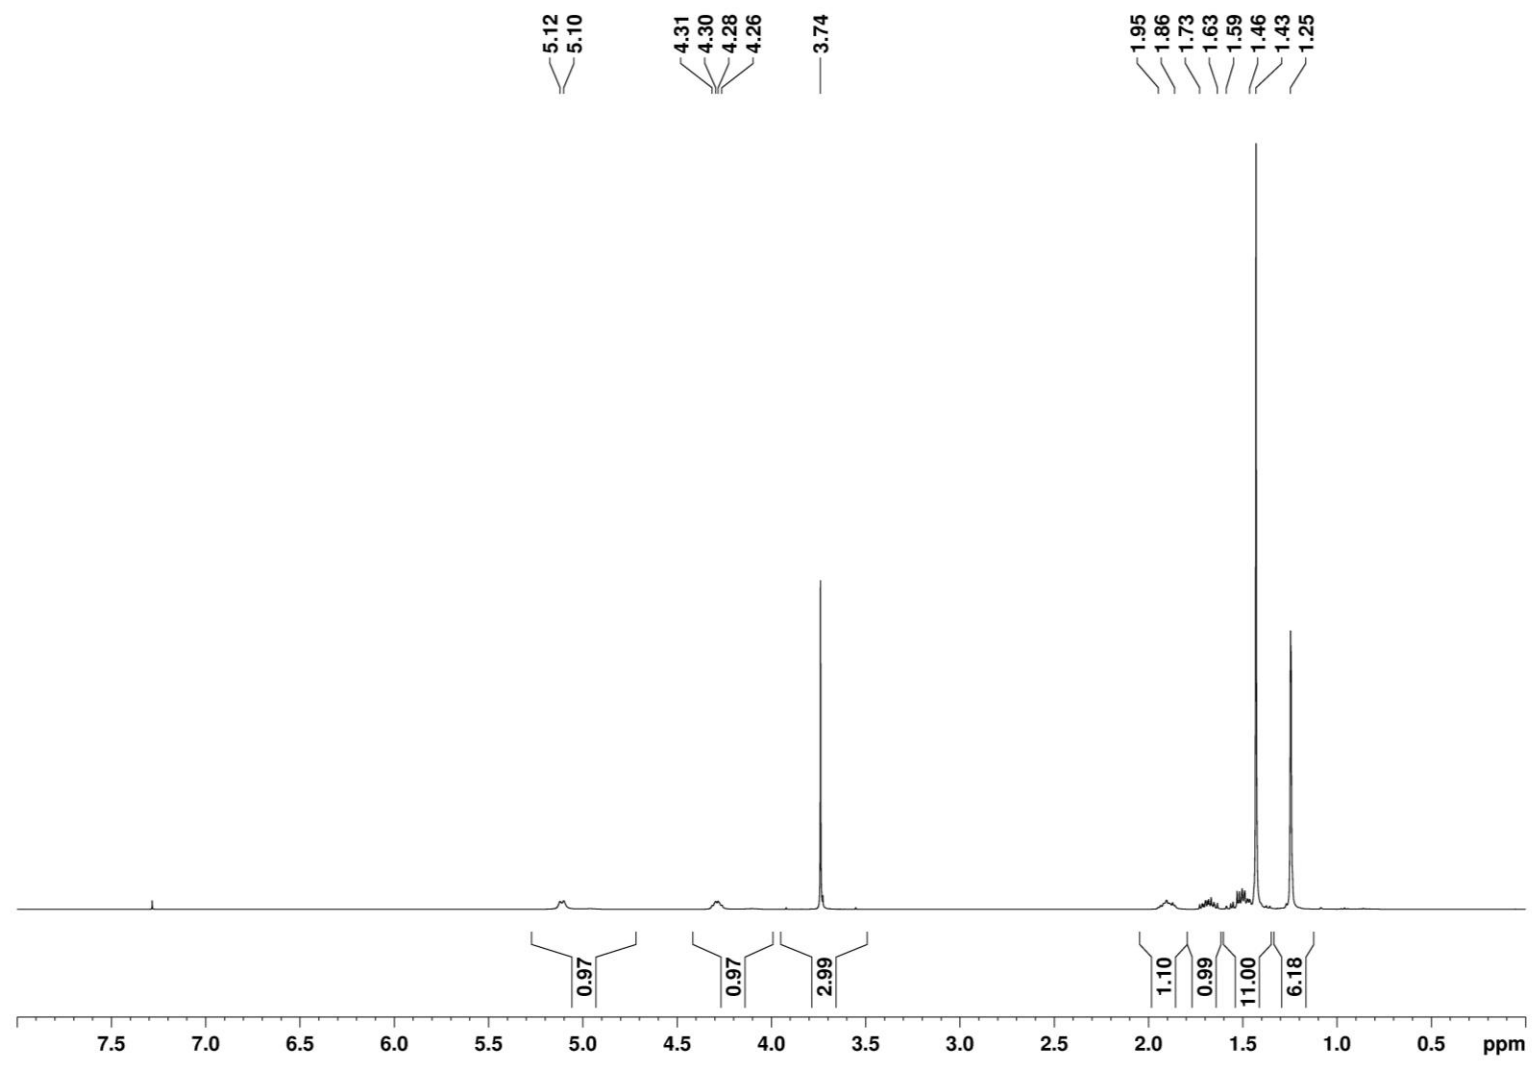

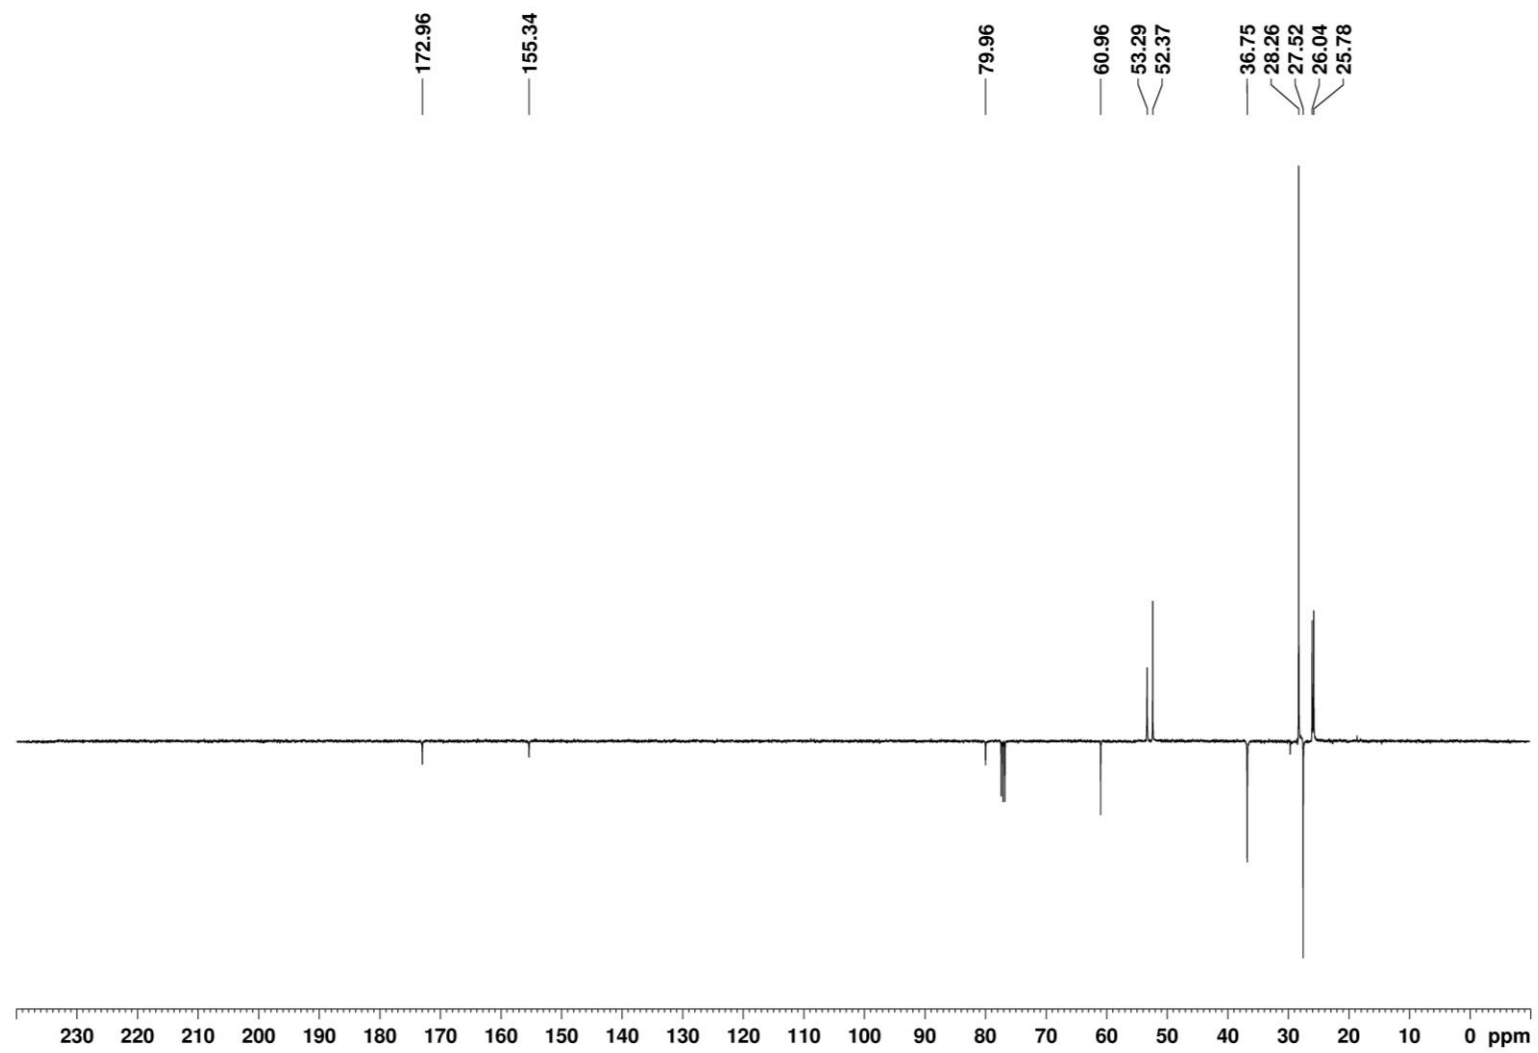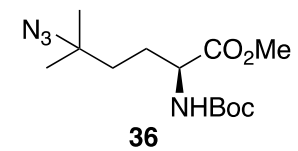

CDCl<sub>3</sub>, 100 MHz

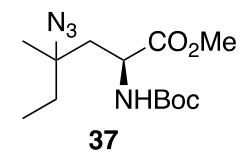

CDCl<sub>3</sub>, 400 MHz

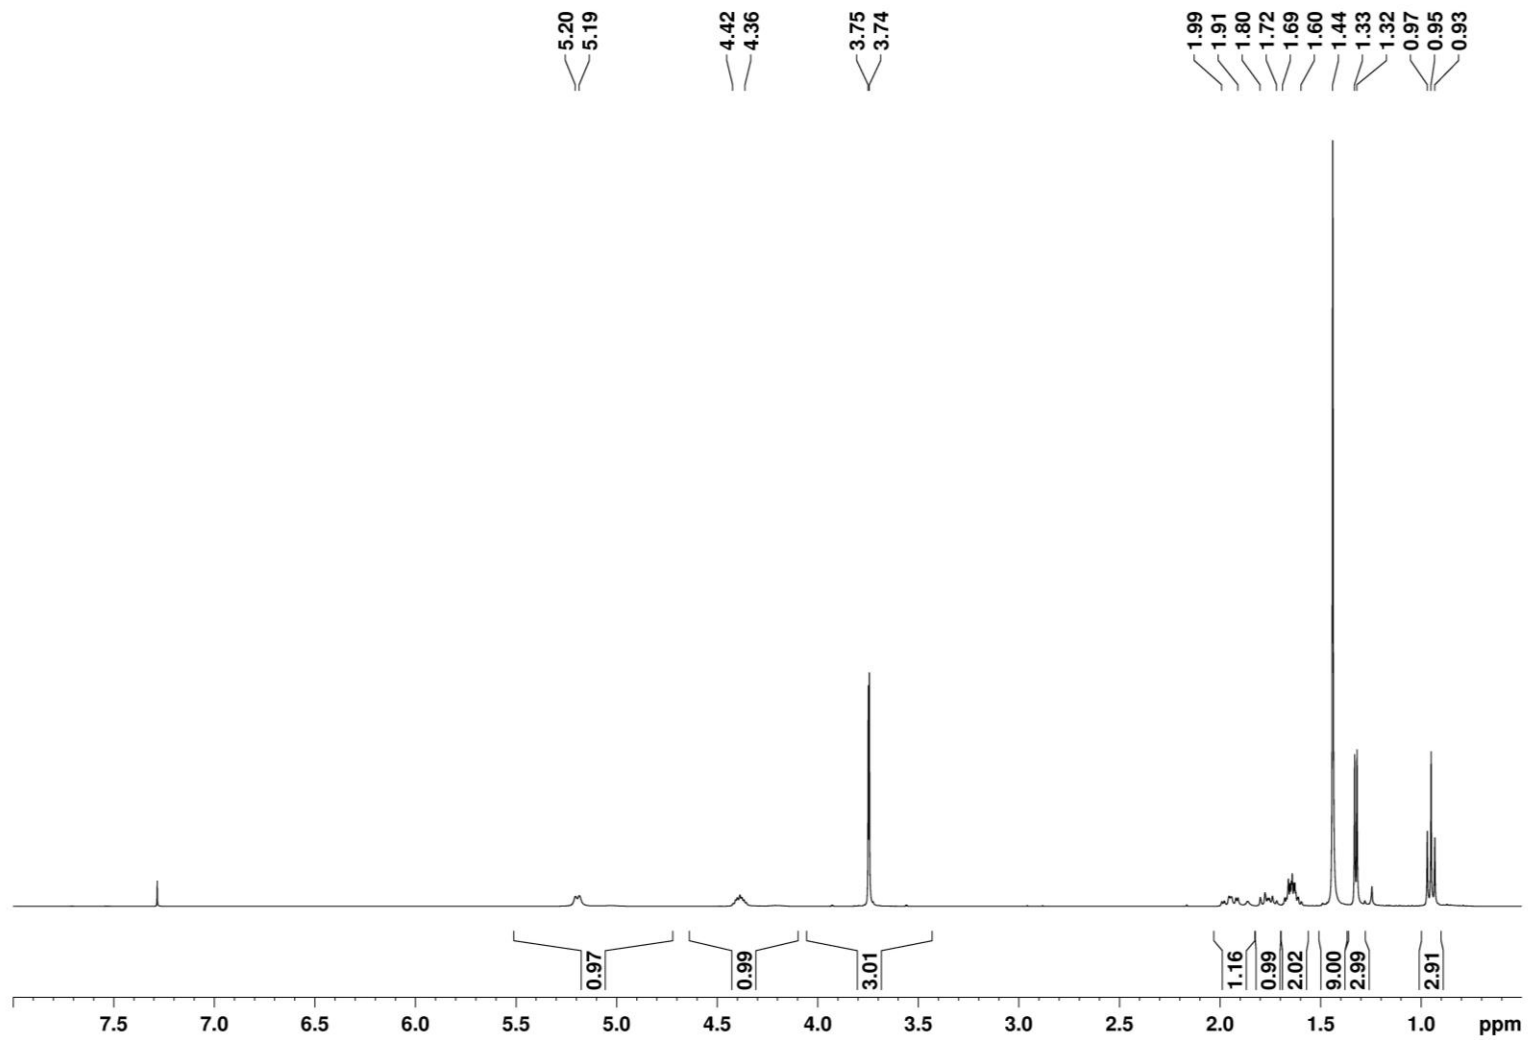

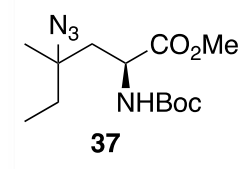

CDCl<sub>3</sub>, 100 MHz

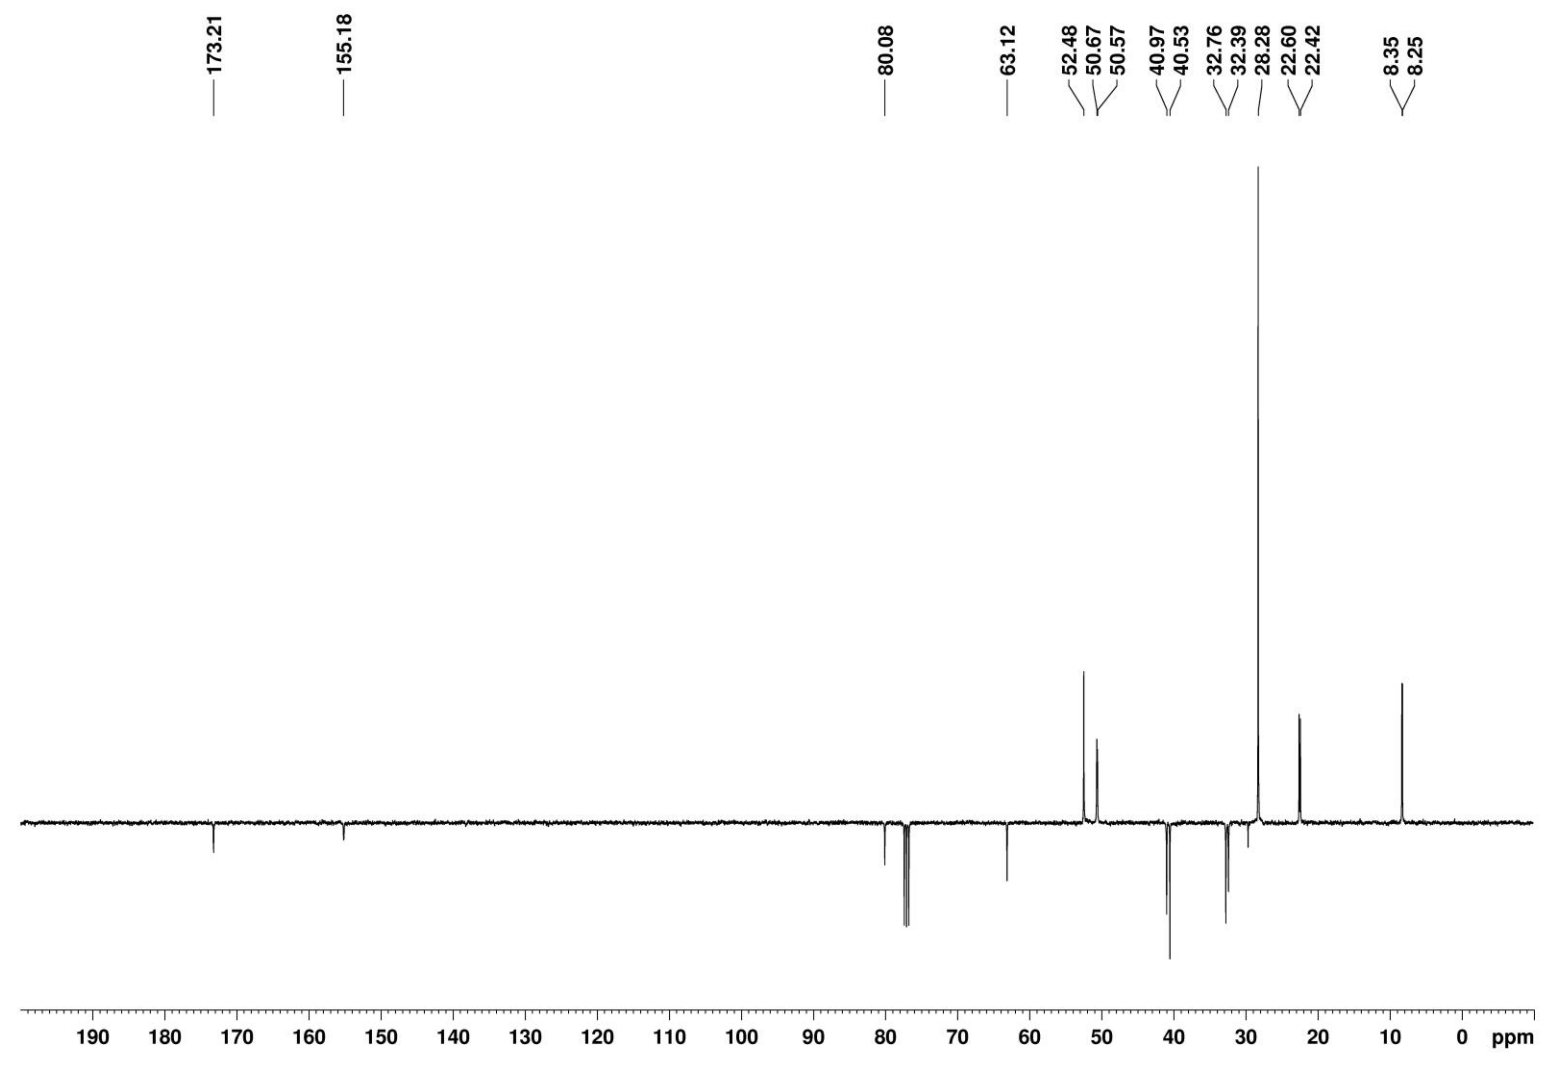

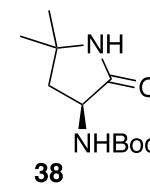

CDCl<sub>3</sub>, 400 MHz

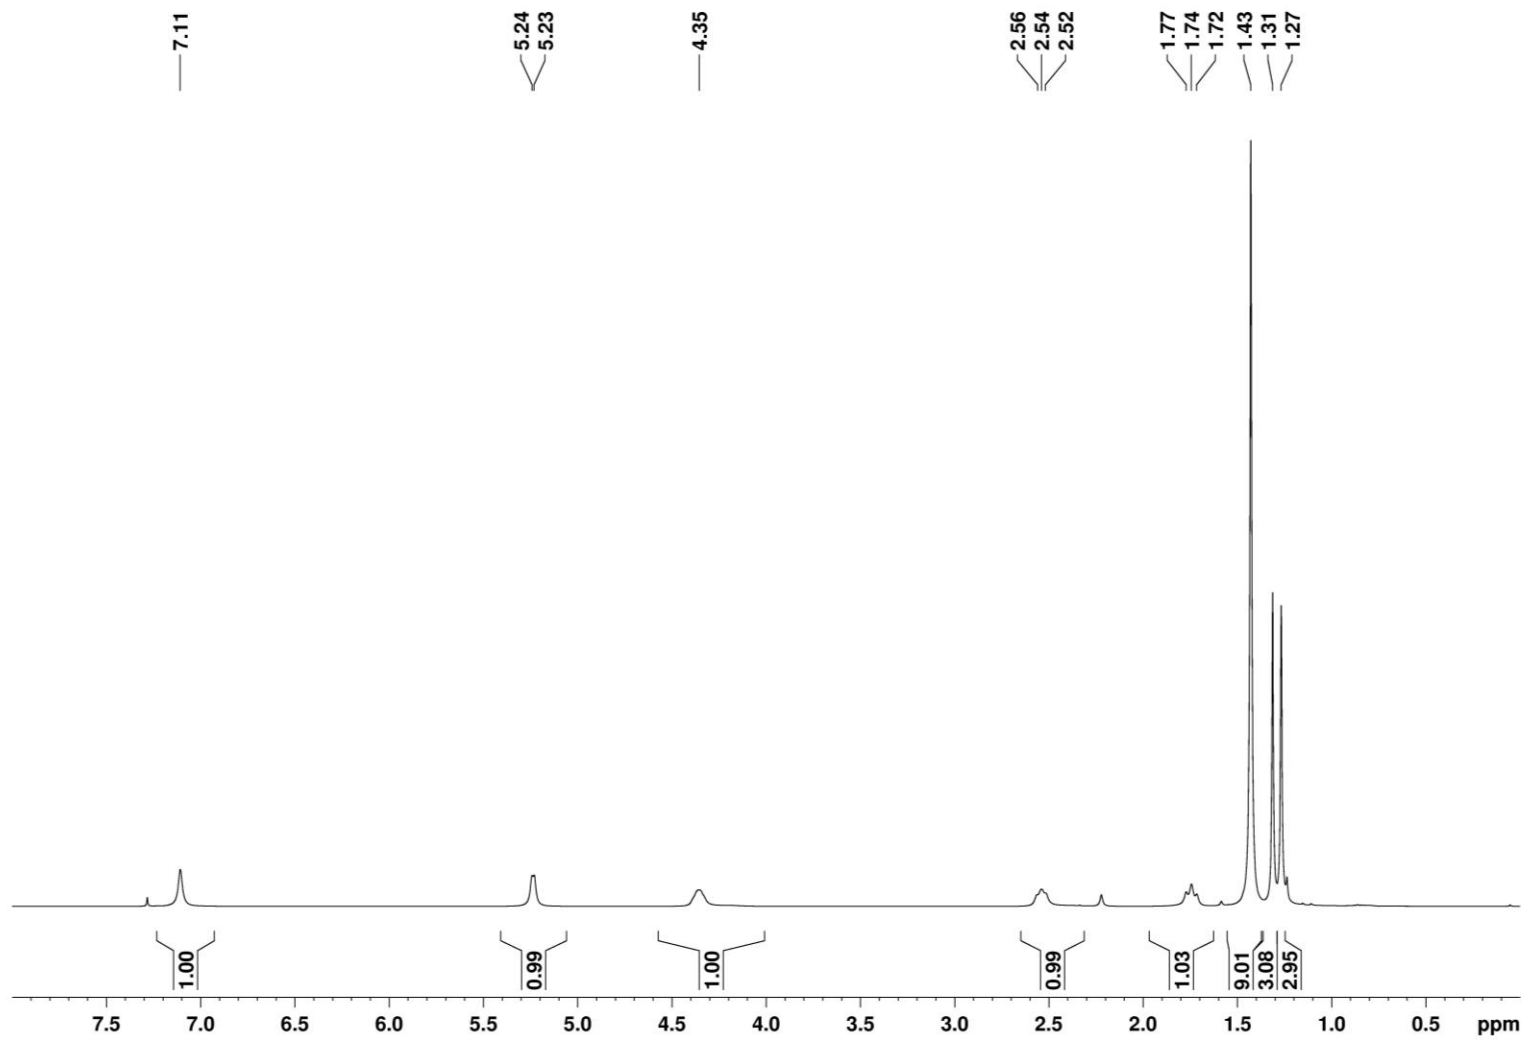





CDCl<sub>3</sub>, 100 MHz

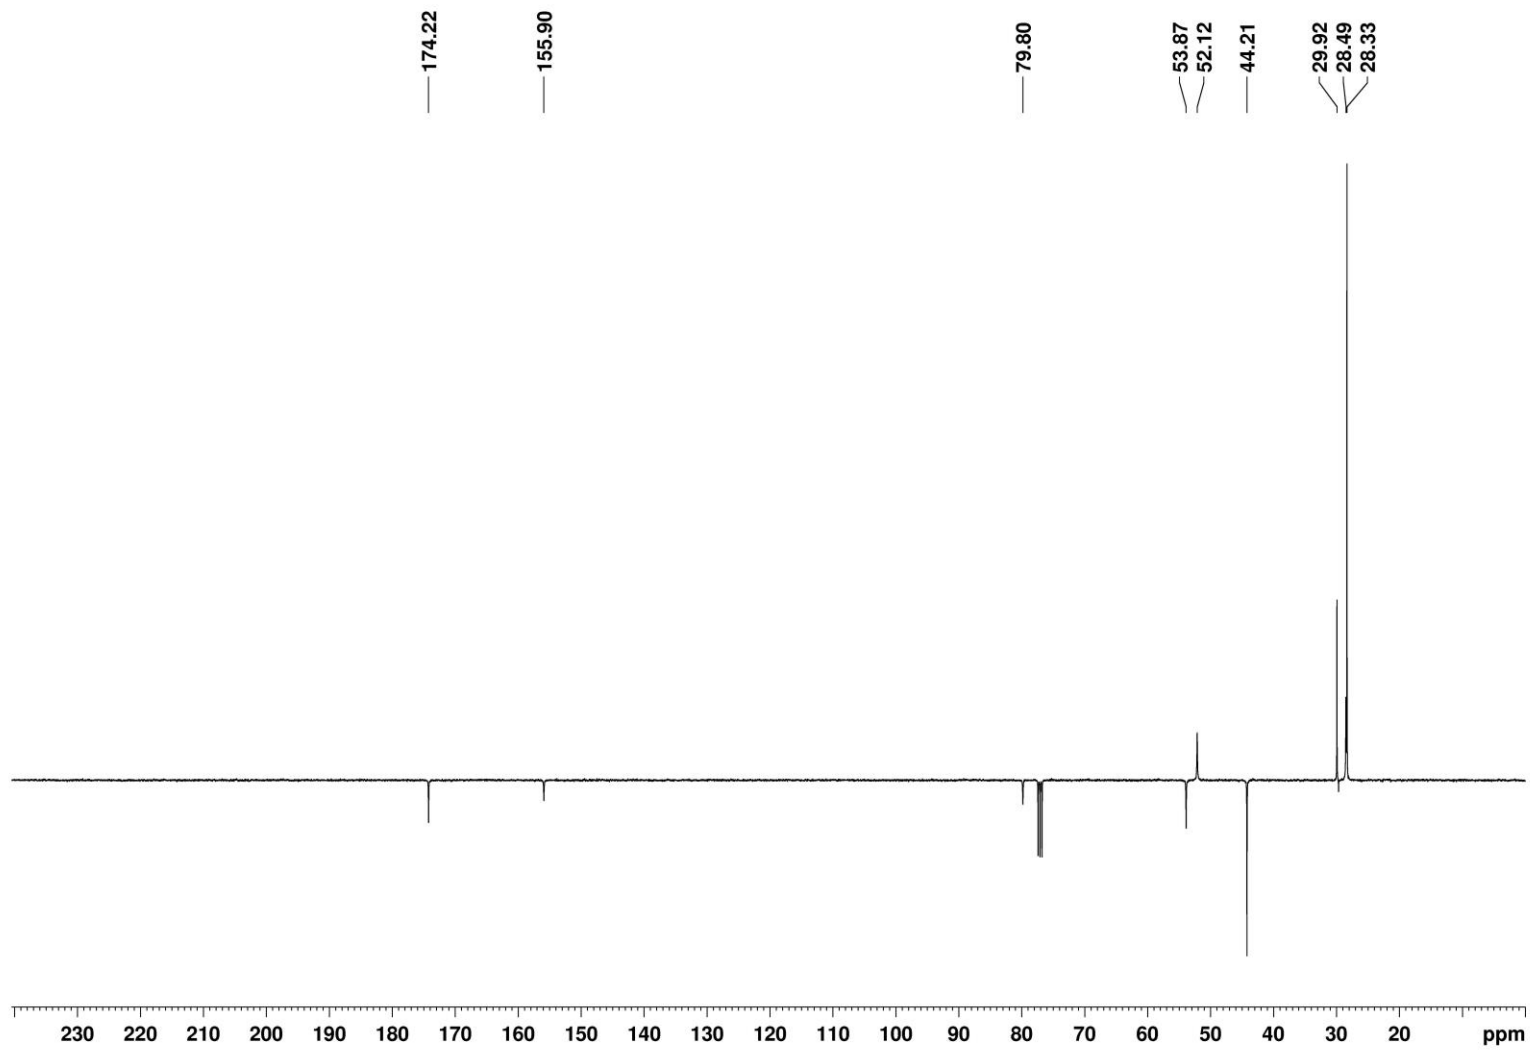

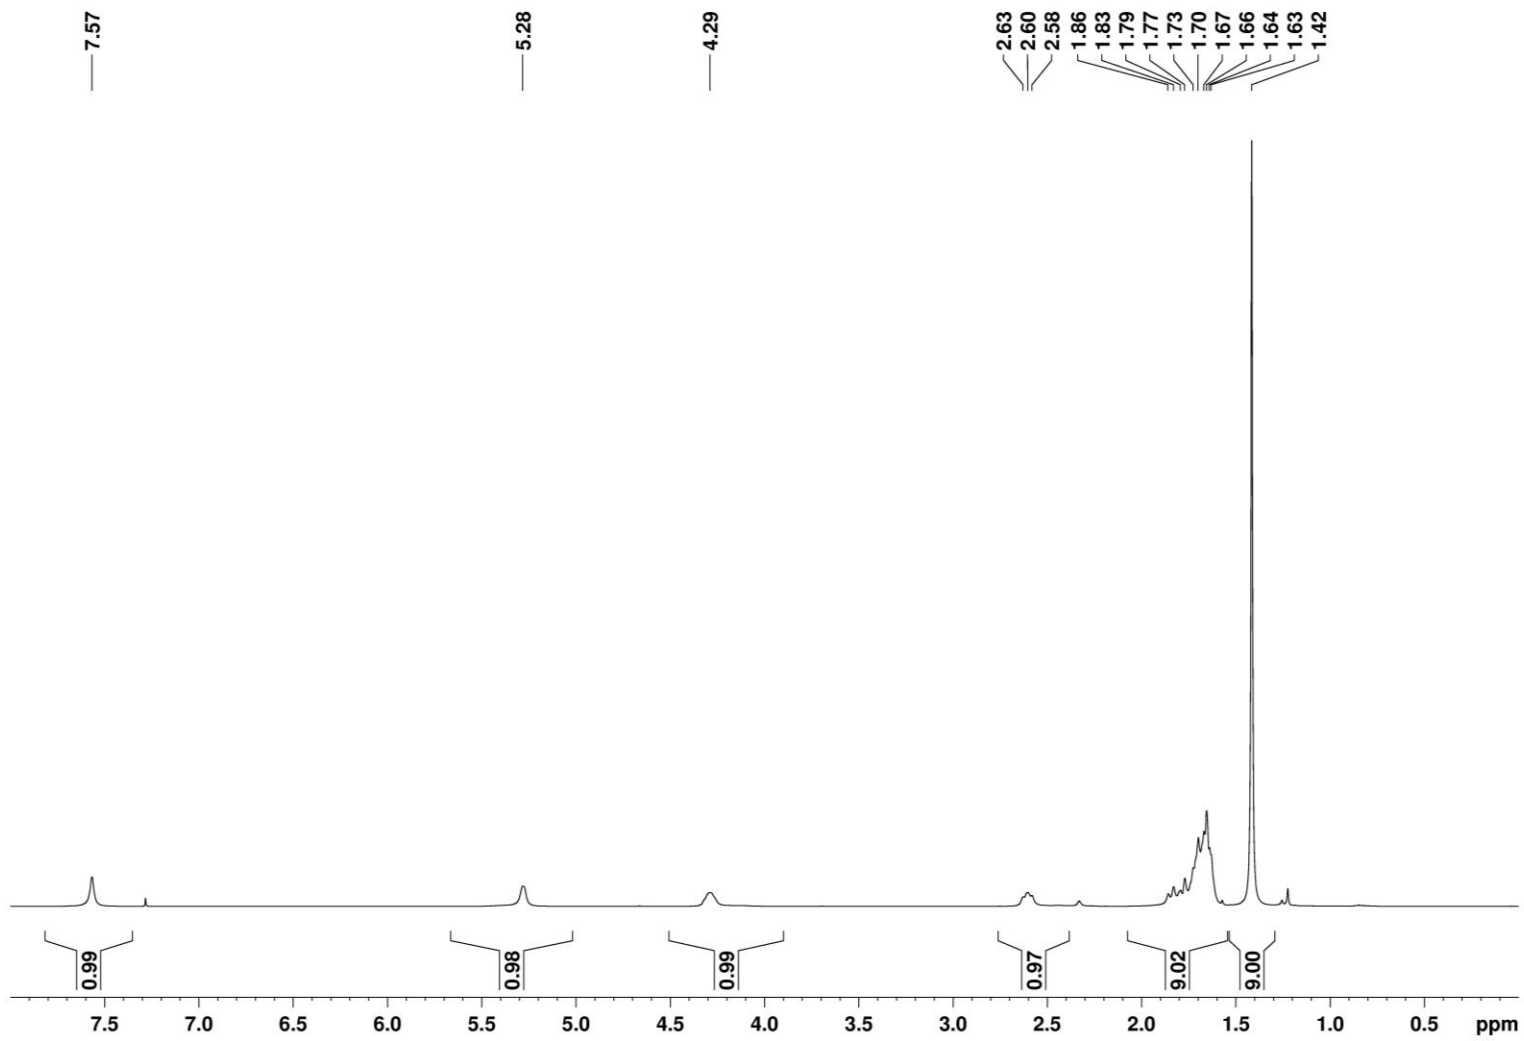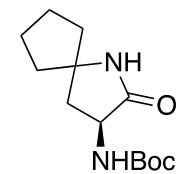

39

CDCl<sub>3</sub>, 400 MHz

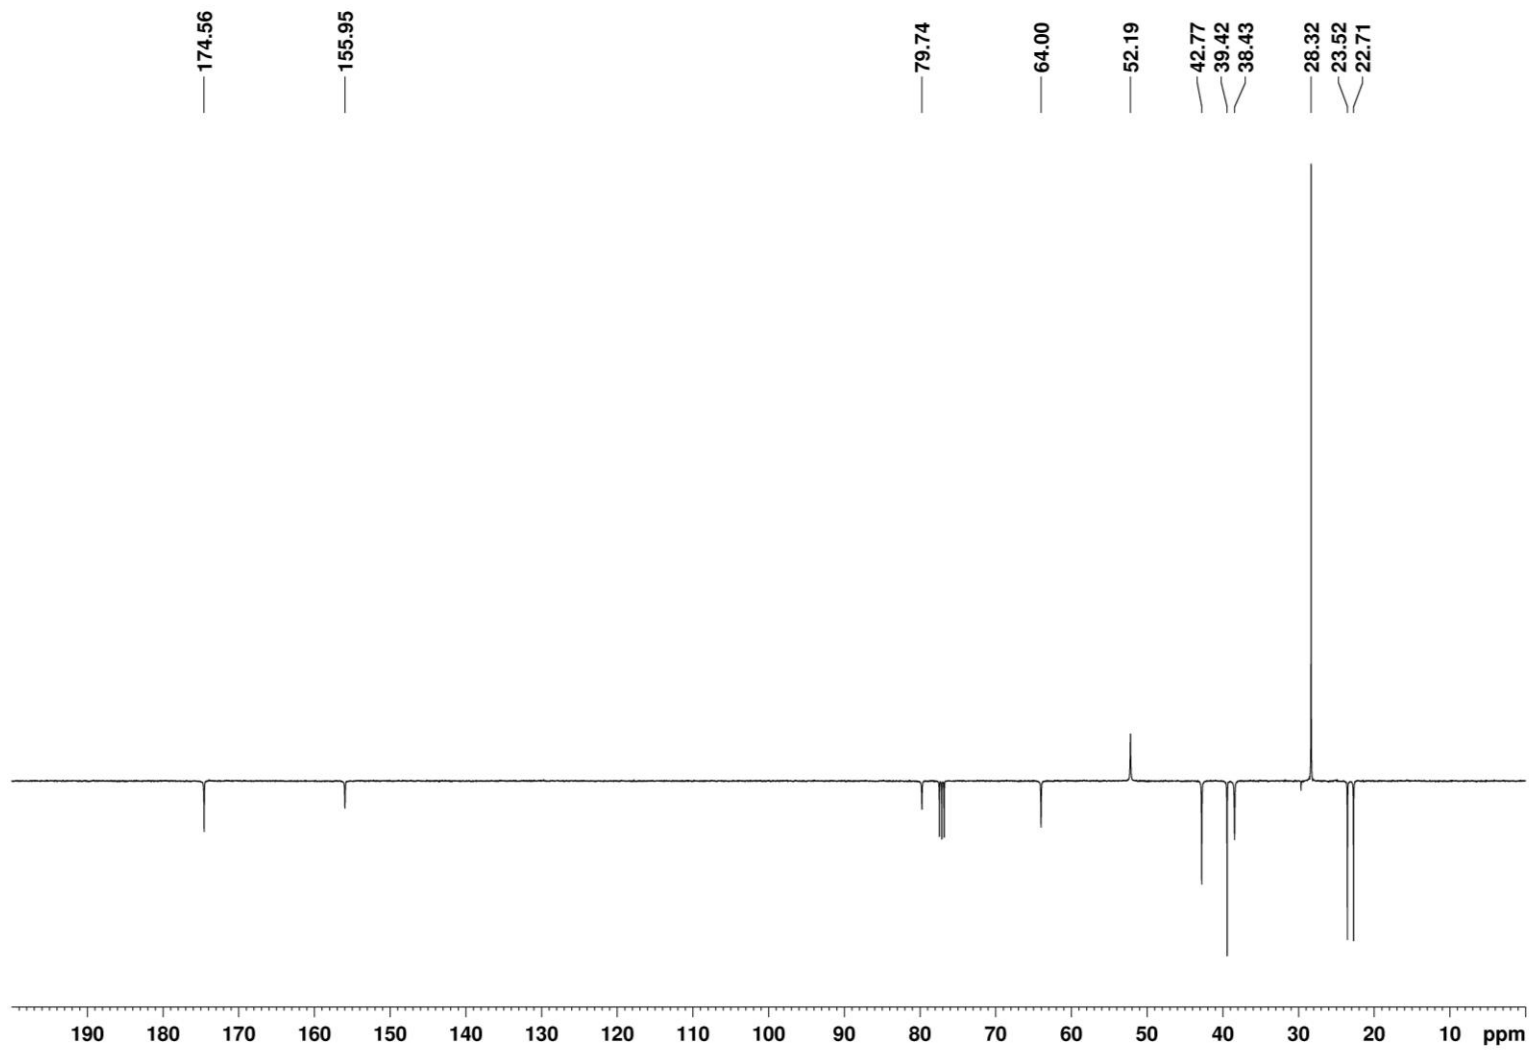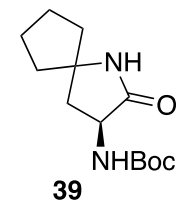

CDCl<sub>3</sub>, 100 MHz

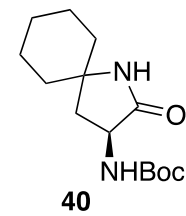

CDCl<sub>3</sub>, 400 MHz

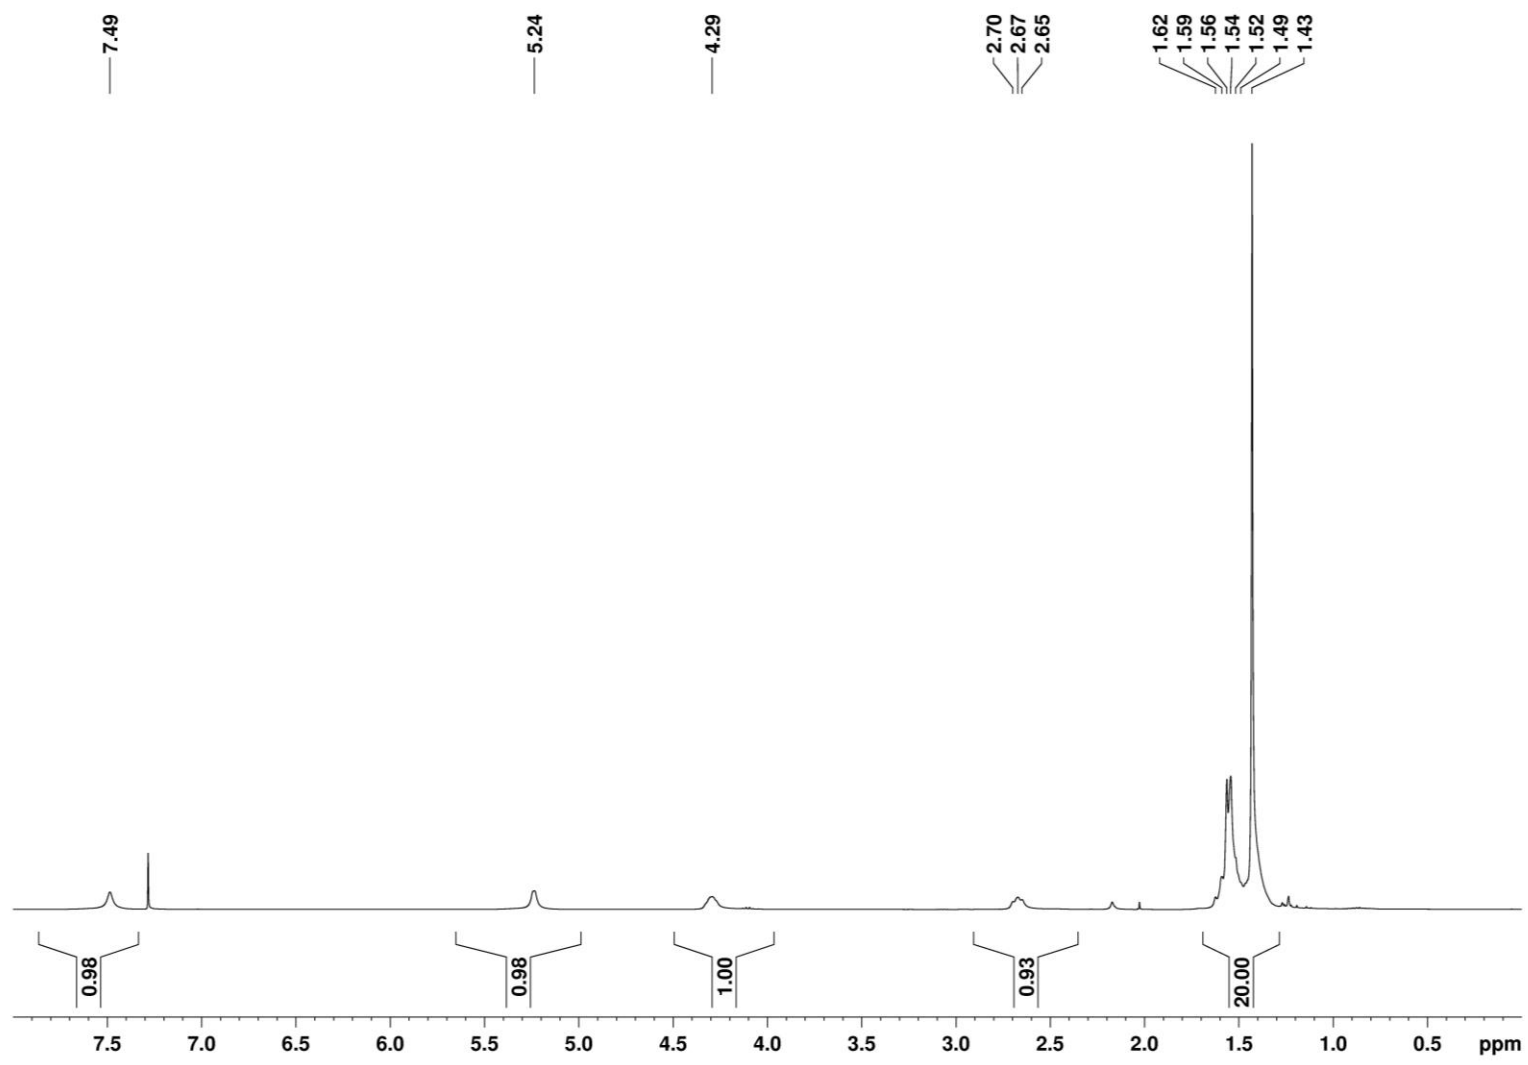

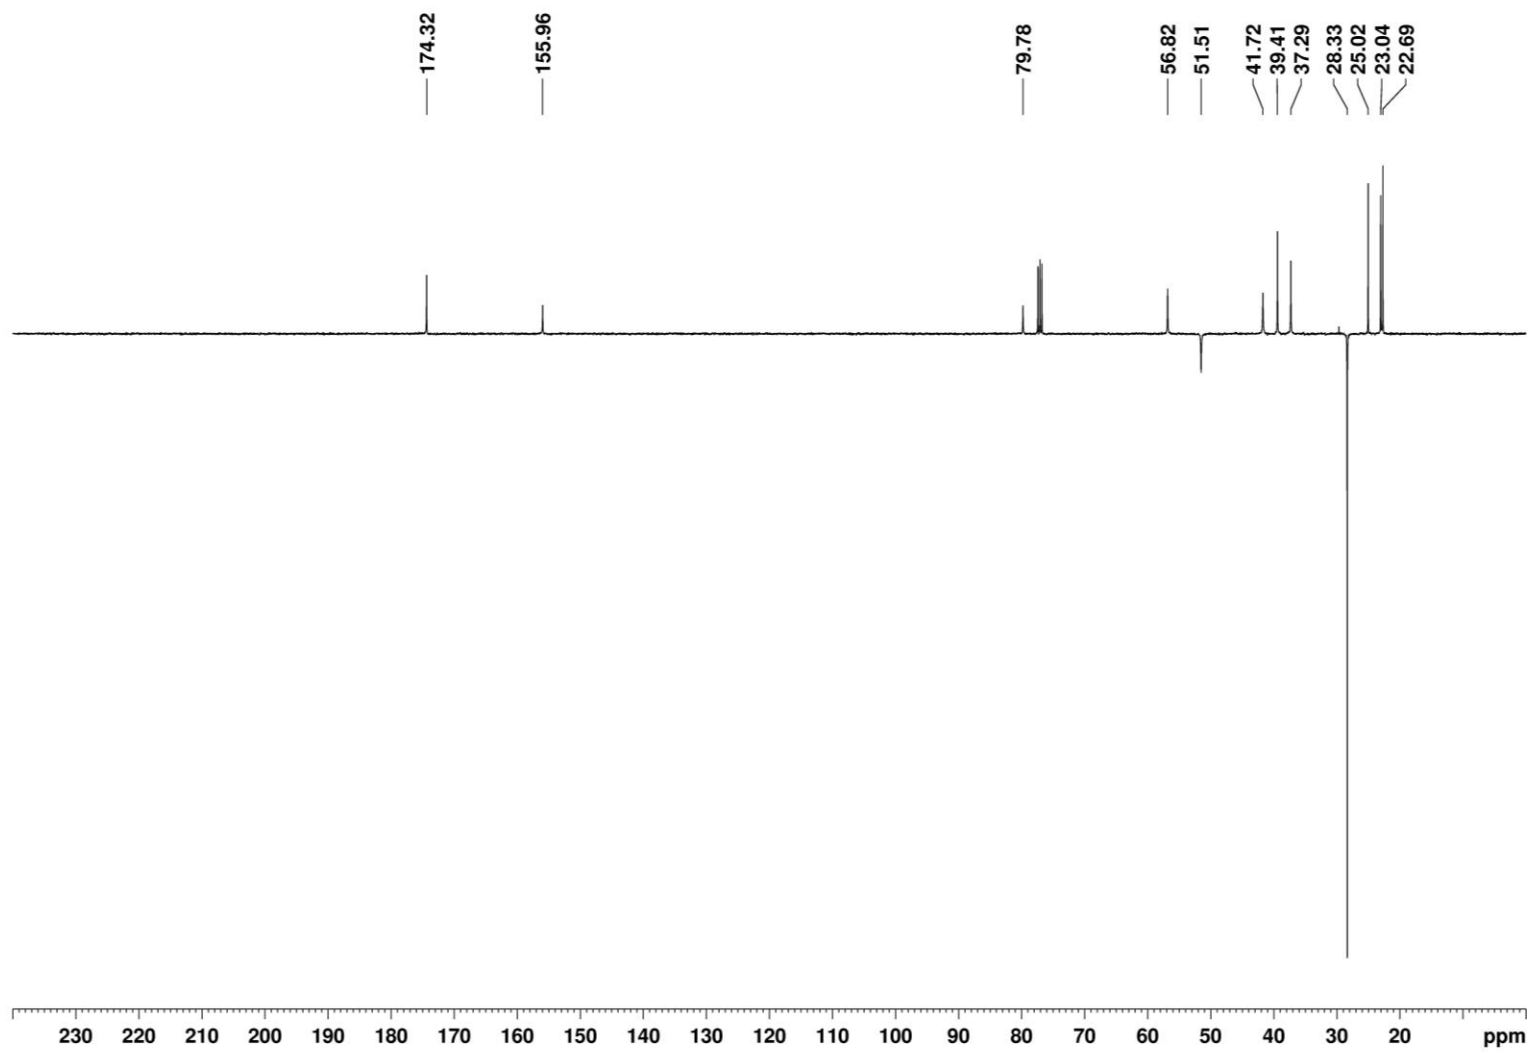

CDCl<sub>3</sub>, 100 MHz

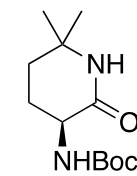

41

CDCl<sub>3</sub>, 400 MHz

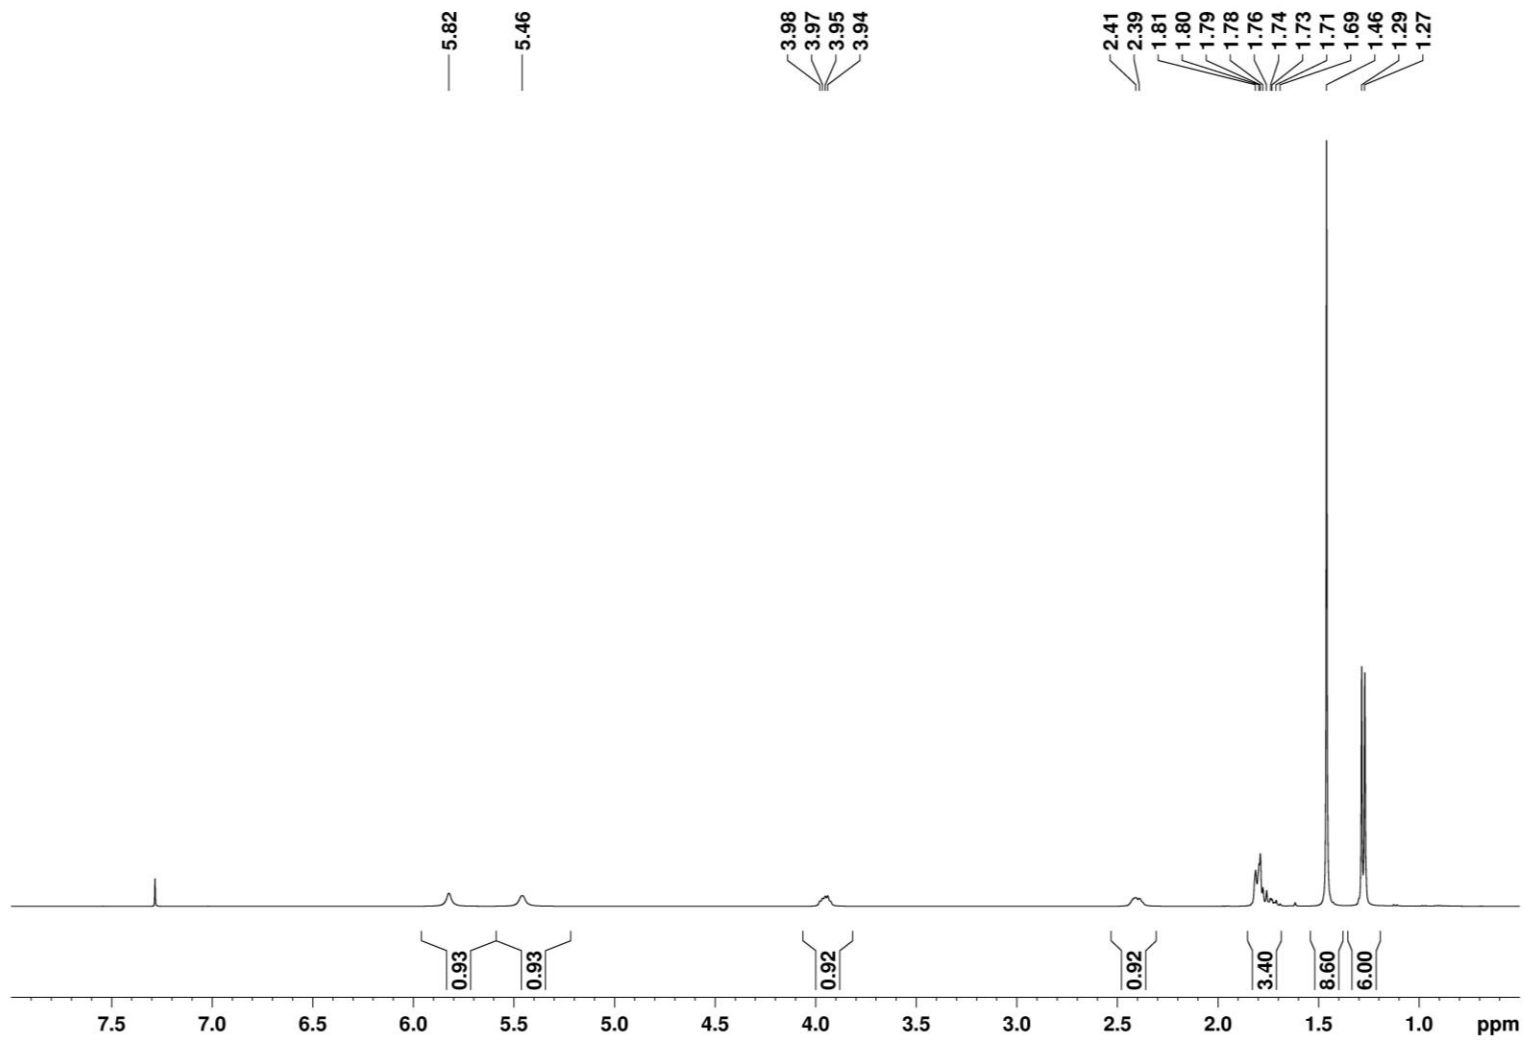

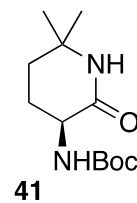

CDCl<sub>3</sub>, 100 MHz

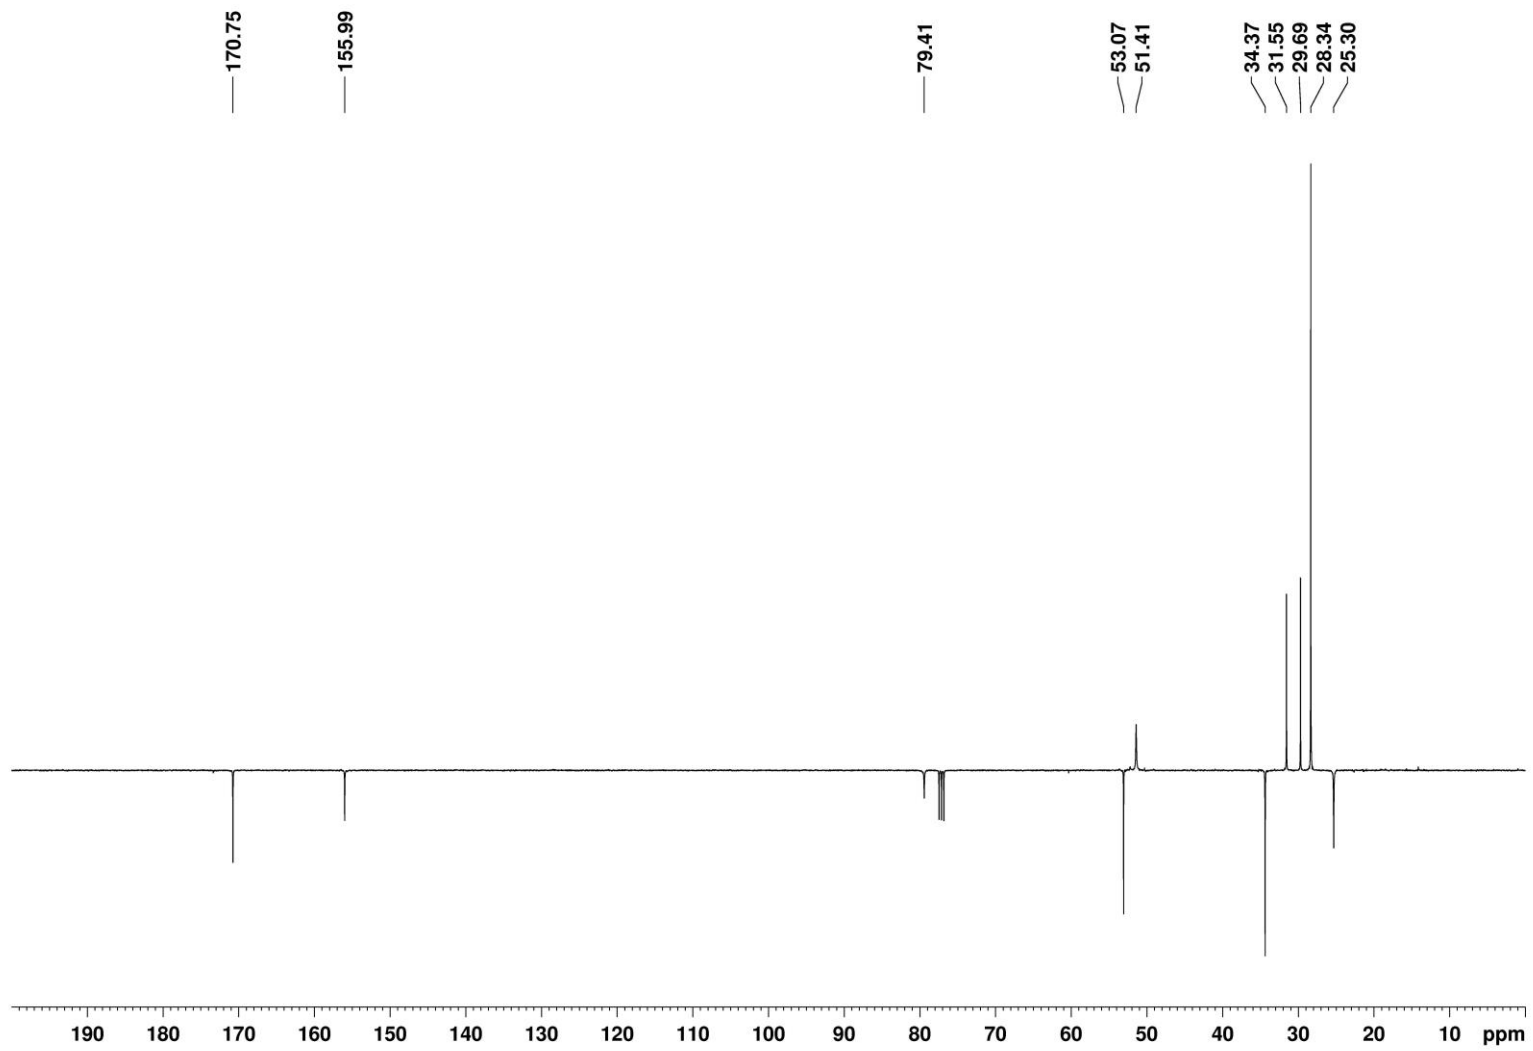

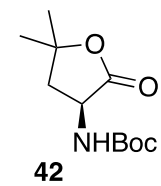

CDCl<sub>3</sub>, 400 MHz

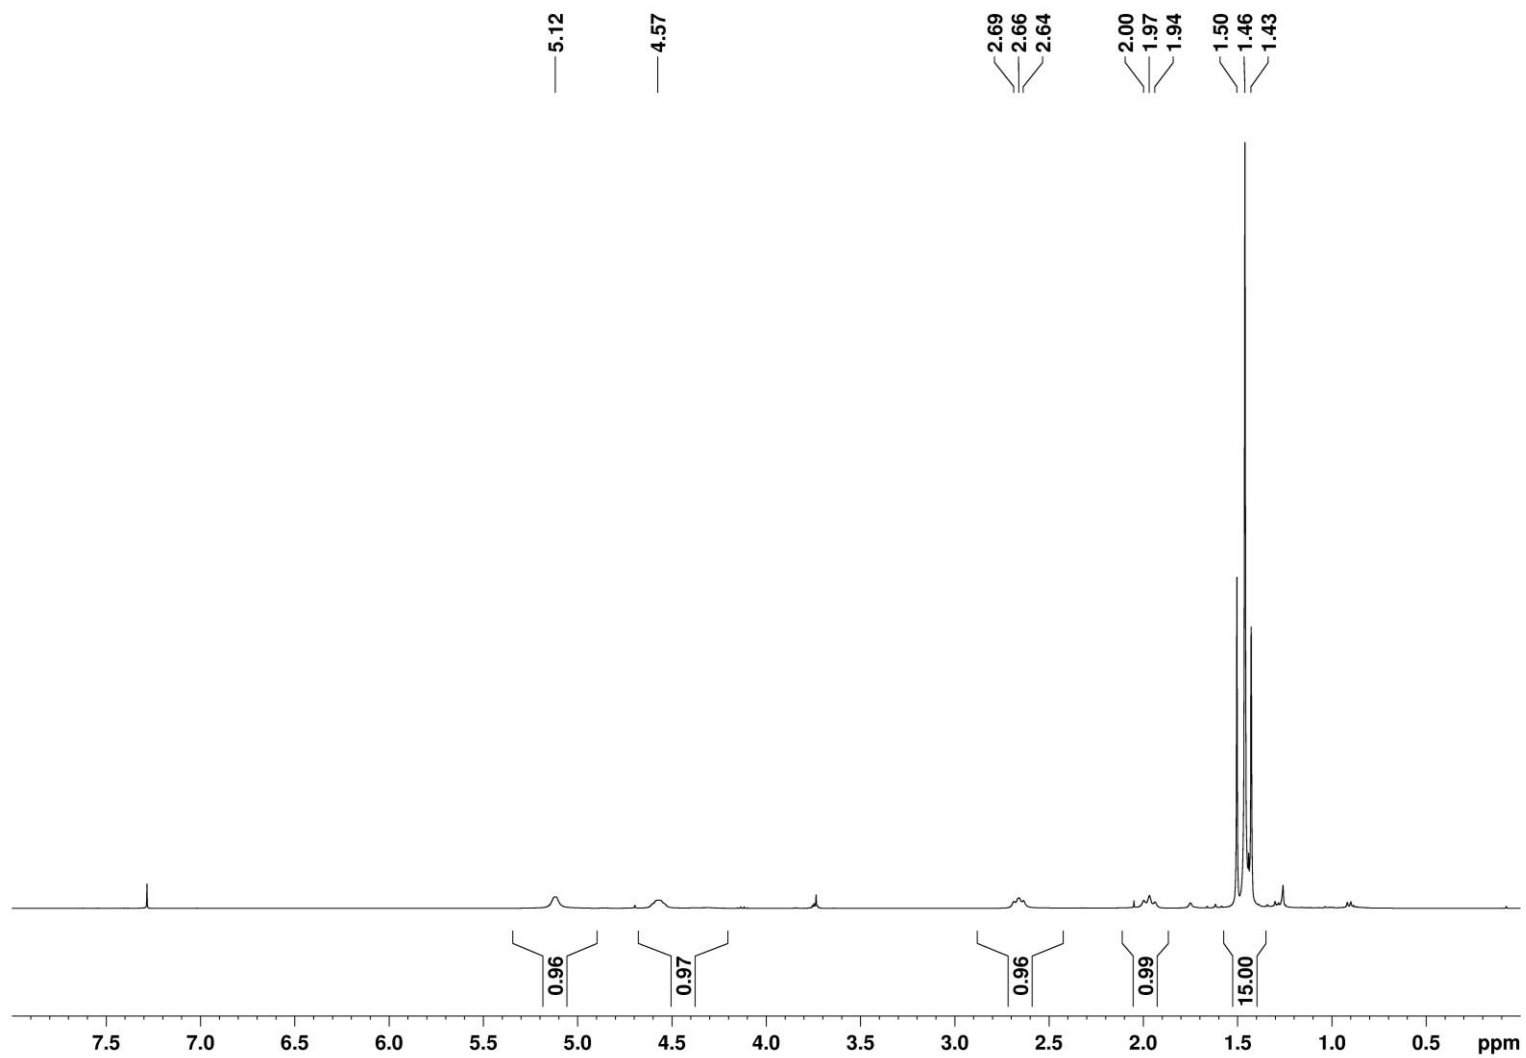





CDCl<sub>3</sub>, 100 MHz

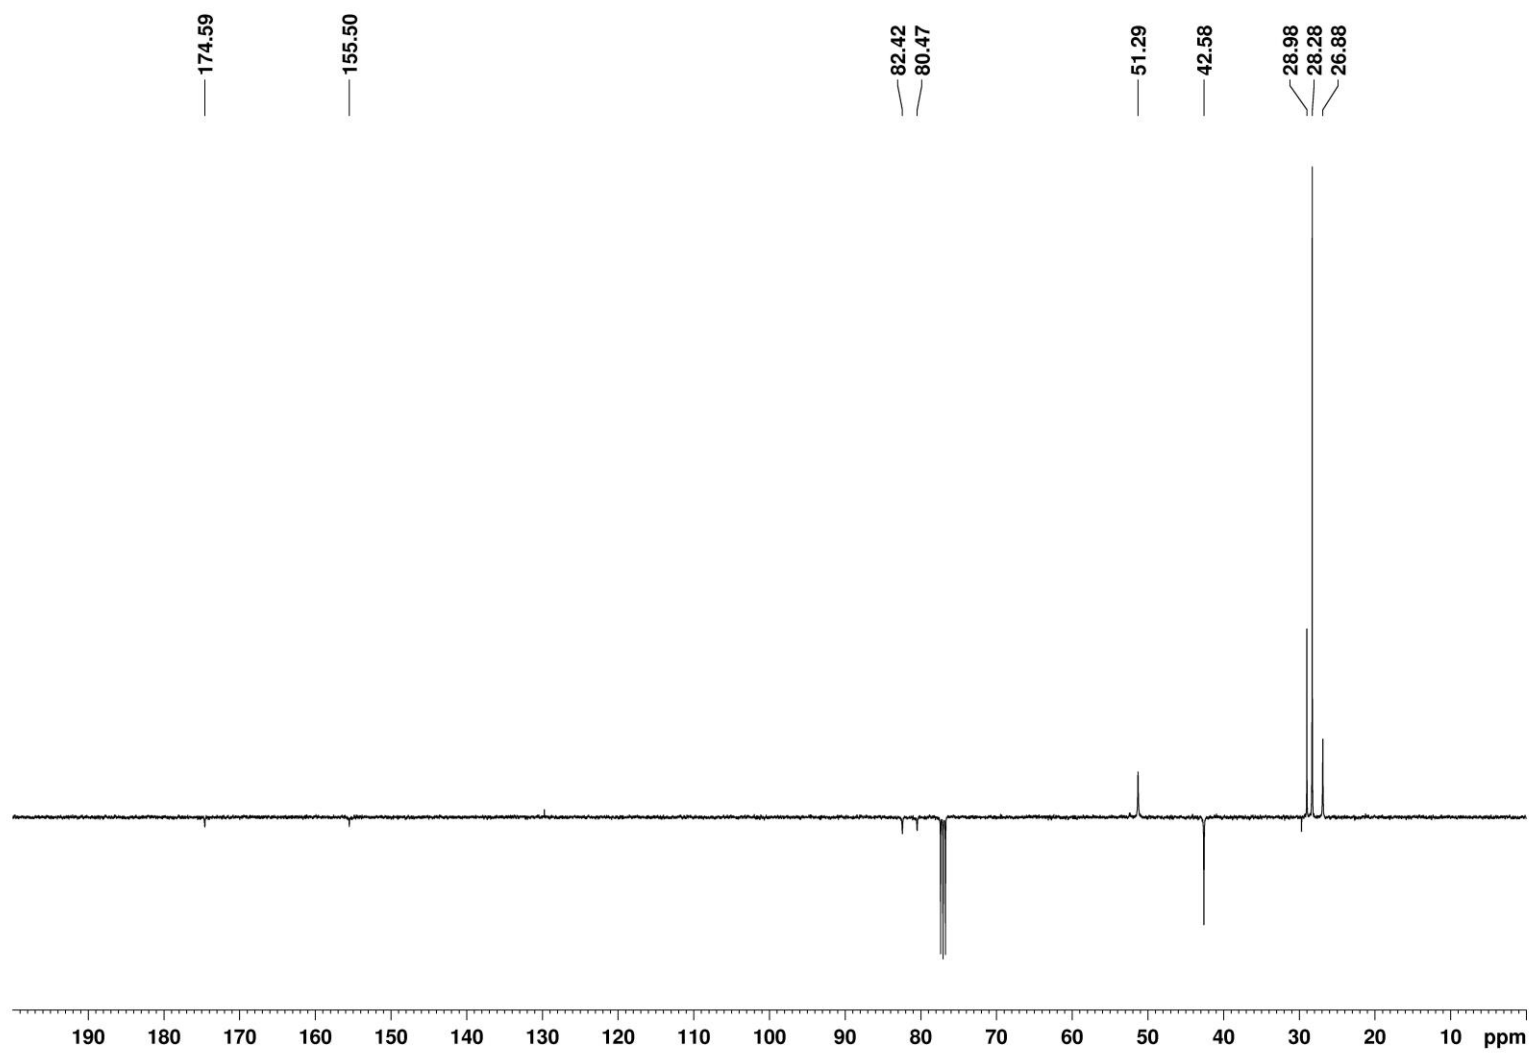

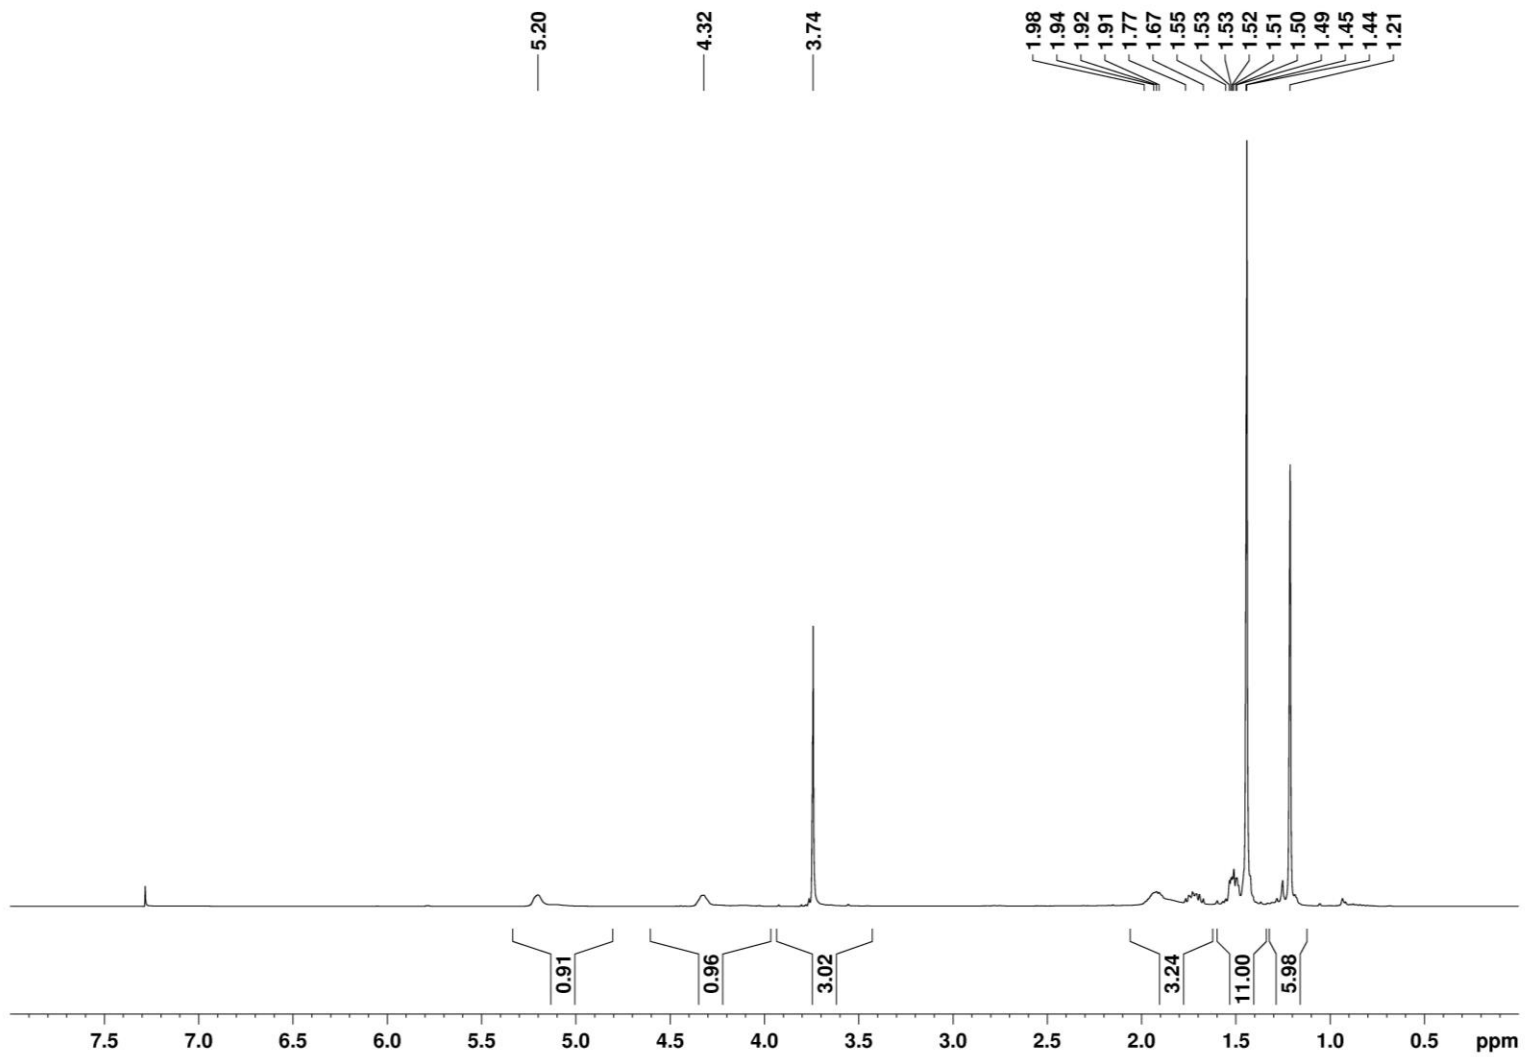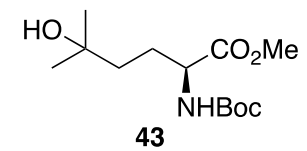

CDCl<sub>3</sub>, 400 MHz

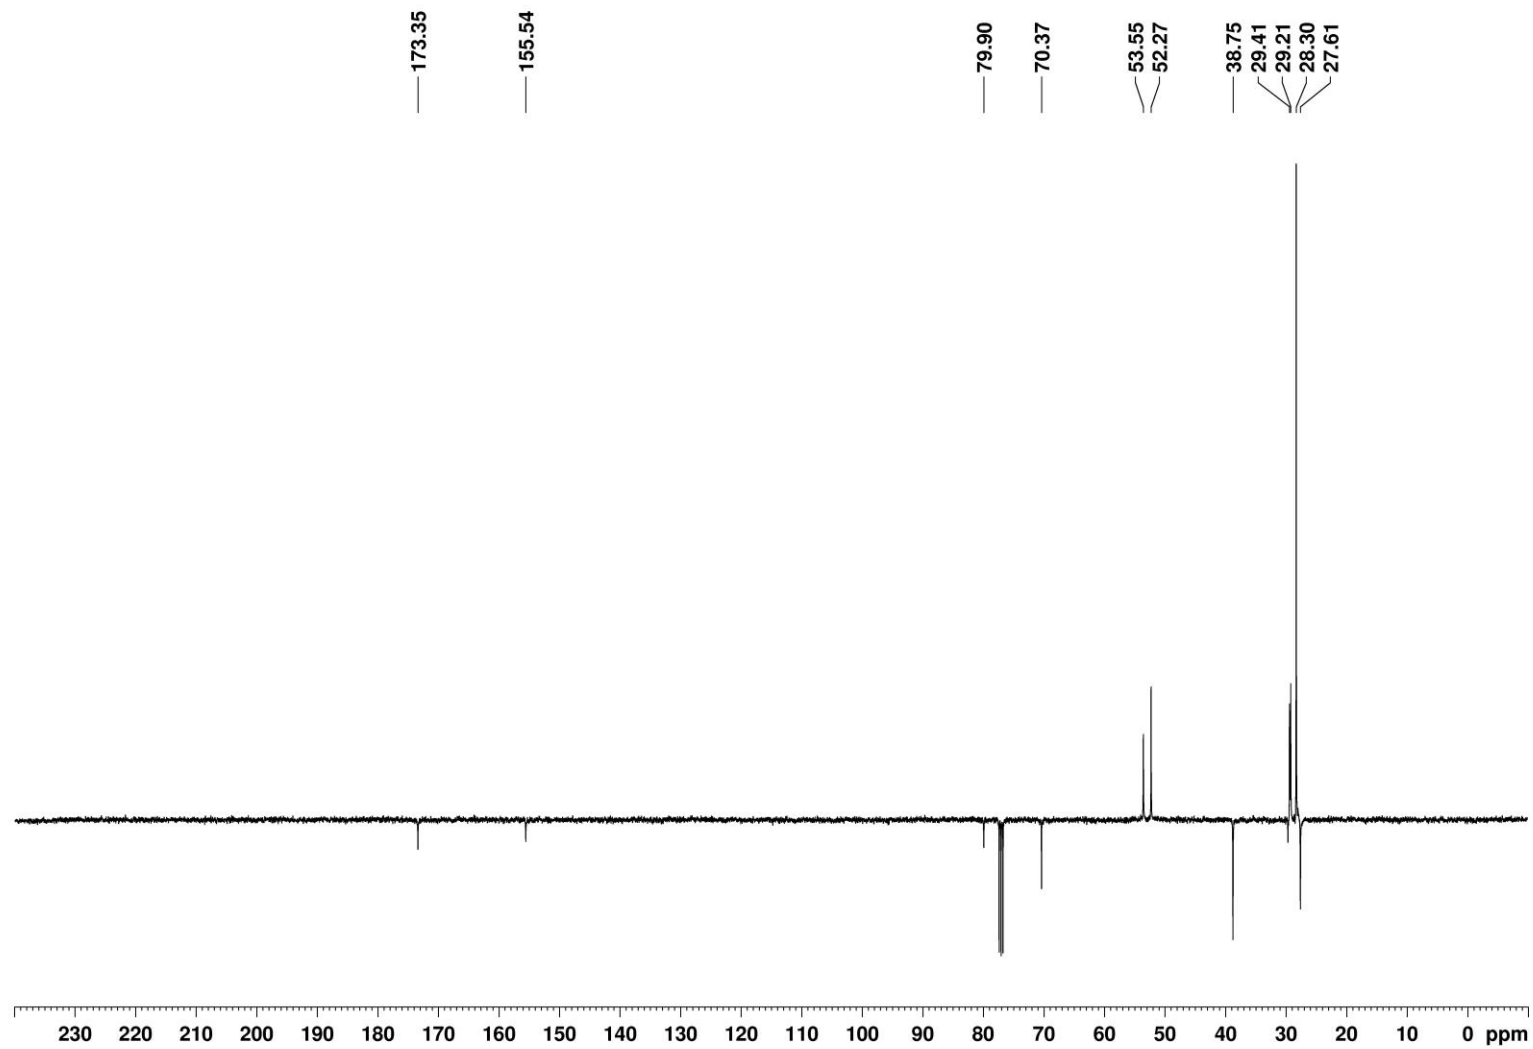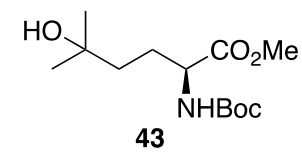

CDCl<sub>3</sub>, 100 MHz

Chiral HPLC was carried out using a Lux-3u Cellulose-1 250 x 4.6 mm column at room temperature in 3 % isopropanol in hexane with a flow rate of 1 mL min<sup>-1</sup>. The traces for the 1 : 2 mixture of **ent-25** : **25** (Plot 1), enantiomerically pure **ent-25** (Plot 2) and enantiomerically pure **25** (Plot 3) are shown.

Plot 1. HPLC trace for a 1 : 2 mixture of **ent-25** : **25**.

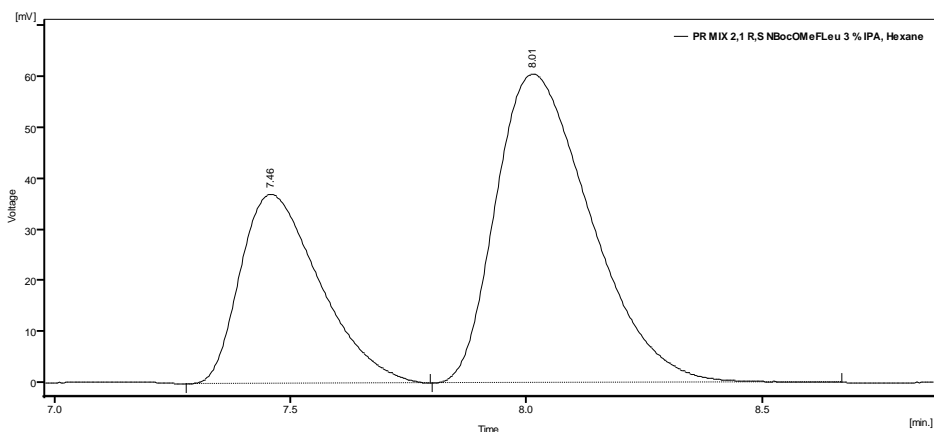

Plot 2. Chiral HPLC trace for **ent-25**.

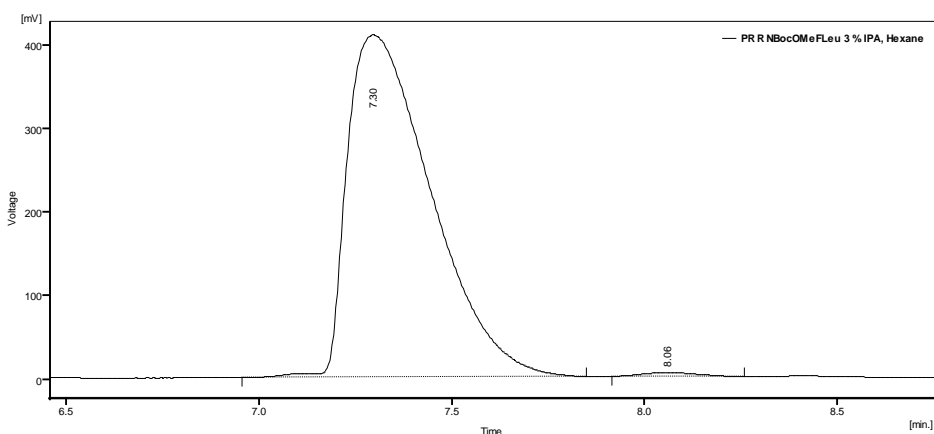

Plot 3. Chiral HPLC trace for **25**.

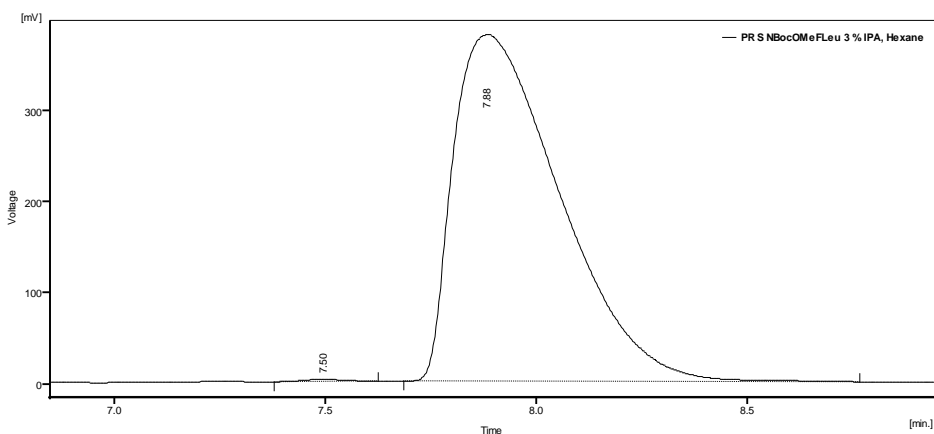

Supplement: ao9b01509_si_001.pdf [file ao9b01509_si_001.pdf]
